# Supplementary material for: Detecting de novo mitochondrial mutations in angiosperms with highly divergent evolutionary rates
Source: bioRxiv preprint, doi:10.1101/2020.12.09.418582, version 2 (2021-02-10)
Supplement: File S1 [file 418582_file02.xlsx]

## Sheet: SNVs
Species	Bio Rep	Library	Duplex UMI	SSCS Family Sizes	Reference Chromosome	Ref Position	Substitution Type	Read Sequence
Silene conica	2	cp	ACGCCGCGGAACCGGTCATAACTC	18-9	Silene_conica_mito_1	4819	A>G	CAAATGGCAAAATAAAATTTCTTTCTTCCCTCTGCCTTTTTGGCACAAATTGTCGAAGCTGGAAGTTGATTGGCTGTAGCTGCTCTTTCTATAGACATAAATTTAGCATTTAAATTAGTACGTACCTTTAATAACTAACCGAAAATCTAACTCACAAACGGTATGTATCTTCTGCTTCAATTGAAGTGGAGCTTTCCCCTATAAAAGAAGCT
Silene conica	2	cp	AGACGAATCTGCCTTTAGCATATT	10-9	Silene_conica_mito_1	26552	A>G	ATAAGAGTAAAACAGAAGAAAAGTAAAGTCTGCCTCCTTTGTATGTATTCAGGATAAGGAGTCCGCAGAAAGGAGCAACATTCTTTCTCTATTTAATTTAGGGCGCTTCCTCTTAAGGATTCTGTGGAAGTTAATTCTTTATAGTA
Silene conica	1	mt	ATATAAAAGTCATTCACGGAACAA	17-9	Silene_conica_mito_1	42630	A>G	ATTTCGCTTAGATTGGGCTGATCTATGTTCCACTTGTCGCGGGCAGTCTTGTCCTCTCTACTCTCGCTTTTCAAGTAGATGCCACTTTTCAAAAAAGGCACAATTTCCGCTAAAAAATGCAAGAAAAGCTACCAAATTAAGAGGGAAGCTAGAGAAAAAGCACGAAACACGCTGAATTAAATAAGCCCGTTTCAACCAA
Silene conica	1	mt	CGCTATTCGTAATGGCAGCCCCAC	15-14	Silene_conica_mito_1	42630	A>G	AAAAAGGCACAATTTCCGCTAAAAAATGCAAGAAAAGCTACCAAATTAAGAGGGAAGCTAGAGAAAAAGCACGAAACACGCTGAATTAAATAAGCCCGTTTCAACCAAATAAGCGTCTCACCTTTCATTTTGAAAAAACAGTAAAATTTCATCGACCCAAAAGAGACTCTTTCGGCTCT
Silene conica	1	mt	ATTATCGTCAATGTGGCTGGCAAC[R1]	9-8	Silene_conica_mito_1	57782	A>G	CTCGCTTTCGTGATAACCGCGCTTTATTCATCCCAACCAAAGAAACGCCCCATAACCATAACAATGGCTTAACCGGGGTGAGTCCTTCCCTTTCTCCGAGGCTTGACAATTCATATCGGCAAGTAAAAGGGAA
Silene conica	1	mt	AGCTAAAAAGAGGGACCGAGTTAT	17-3	Silene_conica_mito_1	71026	A>G	CTTGACTGGCTTAATTAAGGAACTCTGATAGCACTGCTTCCCTTGCCTCTTCCAAGCATCTCGTGGGATGGGTAACGACCTTTCTTTTCAAAGGAACCTCCCCGGTCTAGTTCAATTCATATTAGCGTCTGCTTACACTTCTTCTTATTTTGGAAACGCTGAG
Silene conica	2	cp	GCTAGCTAAGACTTGCTCTTCAGC[R2]	9-6	Silene_conica_mito_1	71026	A>G	ATAGCACTGCTTCCCTTGCCTCTTCCAAGCATCTCGTGGGATGGGTAACGACCTTTCTTTTCAAAGGAACCTCCCCGGTCTAGTTCAATTCATATTAGCGTCTGCTTACACTTCTTCTTATTTTGGAAACGCT
Silene conica	3	cp	CTCATCGAAATGGCAGCCTAATAA	15-12	Silene_conica_mito_1	71026	A>G	TGCATGCAACTTTCTAATCGACAGGGGGATAGAGAACCTAGAAAGCTTGACTGGCTTAATTAAGGAACTCTGATAGCACTGCTTCCCTTGCCTCTTCCAAGCATCTCGTGGGATGGGTAACGACCTTTCTTTTCAAAGGAACCTCCCCGGTCTAGTTCA
Silene conica	3	cp	ACTCCCAGCGCAATAAAGAATACA	11-8	Silene_conica_mito_1	71026	A>G	TGCCTCTTCCAAGCATCTCGTGGGATGGGTAACGACCTTTCTTTTCAAAGGAACCTCCCCGGTCTAGTTCAATTCATATTAGCGTCTGCTTACACTTCTTCTTATTTTGGAAACGCTGAGATTTATAGATTTATATTAAACAACGGATTGGATGCTCTGGCTGGATCCGAAGAAAGAATCTAGGAAGCCTGCTTGAT
Silene conica	1	cp	CGTAGTTGCGGCTGAATCACACTC	27-20	Silene_conica_mito_1	114652	A>G	AAGAAGATCAAAACAGTACAGGTGAAAATCTTCTTTCACCTGTGCATATGTTAGACCTCTCGCTTTACTCATCCCTACCCTCTTACCAGACTTAGACTCCTACTCGTGCTTTCTTTTCCAAGACCAGTTGTACCGCCGCAGTCACTCCCACGAGAGCCGGAAAGCAGGTGGGATTCTGGGATTATCAGTTCGAATTAAAGAGCCAAACCTGACTAGAGGAAGGTTAGGAG
Silene conica	1	cp	ACATCGAAAAAGCACCATTAACAA[R2]	19-13	Silene_conica_mito_1	123792	A>C	TAAGGAGTGGGGCTTATAGCTCGACCGTGAGGAGATAGAGATGAGGTTTAGCTCTCTTTTTTCATAGGGAGAGCCTGATAAATCTCCTGAGGAGAGATAGACCGTAAGGCATGACATGACACGAGTGCCGGCG
Silene conica	1	mt	CCCAGTTTCCTCCGTCCGACGCAA	18-14	Silene_conica_mito_1	123792	A>C	TGGGGCTTATAGCTCGACCGTGAGGAGATAGAGATGAGGTTTAGCTCTCTTTTTTCATAGGGAGAGCCTGATAAATCTCCTGAGGAGAGATAGACCGTAAGGCATGACATGACACGAGTGCCGGCGAGAGGGAAGGGTGCAAAGTGGGACTTGACTTCCAAGGAA
Silene conica	2	cp	AACCCACTGCCCGACCAGCCAAGC[R2]	15-8	Silene_conica_mito_1	123792	A>C	TGCGGGCGAGGGGTGGAGAGGTTACGAGGTCGACTGCTAAGGAGTGGGGCTTATAGCTCGACCGTGAGGAGATAGAGATGAGGTTTAGCTCTCTTTTTTCATAGGGAGAGCCTGATAAATCTCCTGAGGAGAG
Silene conica	2	cp	GGTCGTTCTTAATATAAGAGAATC[R2]	26-11	Silene_conica_mito_1	123792	A>C	CTTTTTTCATAGGGAGAGCCTGATAAATCTCCTGAGGAGAGATAGACCGTAAGGCATGACATGACACGAGTGCCGGCGAGAGGGAAGGGTGCAAAGTGGGACTTGACTTCCAAGGAAAGGAGACTCGGGTACG
Silene conica	3	cp	AAAACAACAGCATGTGCGCAAGAA[R2]	12-10	Silene_conica_mito_1	123792	A>C	GAGGTCGACTGCTAAGGAGTGGGGCTTATAGCTCGACCGTGAGGAGATAGAGATGAGGTTTAGCTCTCTTTTTTCATAGGGAGAGCCTGATAAATCTCCTGAGGAGAGATAGACCGTAAGGCATGACATGACA
Silene conica	2	cp	ACAACTGAGACATCCATATAGTTT[R1]	11-7	Silene_conica_mito_10	29801	A>G	CTTTAATAGCTAGGGTTTCAACCAACGAGAACCAAGTGTAAAAAAAATGTTAACCTTTCTCCTATAGGGGGCCAGCAAGCTTCTTCCACGGGTGCTGCATCTATTTAACCGGGCATCAGTGCGTCCTTGATTG
Silene conica	1	mt	CCTTGTACGTAGTTAAGAGGAAAA[R1]	16-11	Silene_conica_mito_10	61746	C>T	CTTTTTAAGTAAGTAAGAAAGCGCCTTCCTTCTGTTAAAAGTGTGGGGATTCTAATTAGAAGAATAGGACGCTTGCCGAAATAGGTTCCTTATGTATGAAACCGCGCGAATGAAGATCTCCCTGAGATGAAGT
Silene conica	2	cp	ACCTGGTTGAAGCCGATCGCAACC	14-4	Silene_conica_mito_10	95005	C>A	ACTGACAAGGAGATAGGATGCAGACTGTTGACCGTAGGGAATTTATTCCTCGTTCTACCCGAAGTGGGACTCGAGTGTTAGCGAGAGGGAGATAGCCCAGGACGGGATTGATCCTGTCGACCGTGAGGGAGATTAGCCCTTTAGGGAGGAGCCTGAGGTACGAAGGTGAGGGGGGATCGAATGACAAGGAG
Silene conica	2	cp	ATTTGACACAACGACCCACAACTA[R2]	11-11	Silene_conica_mito_10	96425	A>T	TGCTCTTGGCTTCAGATTGAACTGATCTTTTGCTTCATCTTGGACTGATCTTTCTCTTCTATTCTTTTGTCTTTGTCTTCTGAACTTAGGGCTGAATTGGGACTGAGCCTAGGCAAATTGATCTGTCCGAGCT
Silene conica	3	cp	TCCACCCGCGGATTGTAATAACAA	14-8	Silene_conica_mito_10	96786	A>C	ATCCTGTCGGCTATTTCGACTTGCTTTCACTTCATCTTTCACTTCTCGAGGCAAAGAAAAACTGCTCTCATTCTCTTAACTTTTCTTGGATTGGAGTCAGAATTTCAGGCAAAAAGCTAGTCCCAGGGGCAAGGCAAGCAAGGGGTTCGTGCCTTGGAAGTGTGATAGAATTGTCTGACCTTTTCCAAATTAAAGTCTACGA
Silene conica	1	mt	CCCCTTGATACCGGCGTTGACCTC[R2]	17-4	Silene_conica_mito_10	120625	A>G	CGACTAAGAAAAGGAAAGAAGAGAGTTATCTGAATAGAATATAAGGAAGACTTCTAAGTCCTAGCCAGTCTTTTTAGAGACTCCGCTGCTGGTTCTTAGGGGAGTTCCTATATTATAGGTGGCAAGTCTAATT
Silene conica	1	mt	CAAGGGCATAAGGCCAATCAAAAT[R1]	13-10	Silene_conica_mito_10	120625	A>G	GATCGACTAAGAAAAGGAAAGAAGAGAGTTATCTGAATAGAATATAAGGAAGACTTCTAAGTCCTAGCCAGTCTTTTTAGAGACTCCGCTGCTGGTTCTTAGGGGAGTTCCTATATTATAGGTGGCAAGTCTA
Silene conica	1	mt	CCCAAACAAACCTTGTACTGATGA	13-10	Silene_conica_mito_10	120625	A>G	AGGGCTCTAATGAGGTGTTCGTCCGATCGACTAAGAAAAGGAAAGAAGAGAGTTATCTGAATAGAATATAAGGAAGACTTCTAAGTCCTAGCCAGTCTTTTTAGAGACTCCGCTGCTGGTTCTTAGGGGAGTTCCTATATTATAGGTGGCAAGTCTAATTCT
Silene conica	1	mt	CCATGGCTTCGACTGAGGAGATTG[R2]	13-11	Silene_conica_mito_10	120625	A>G	CTGGTTCTTAGGGGAGTTCCTATATTATAGGTGGCAAGTCTAATTCTGTATTAAACAAGACAATAGTACTAAAAGAATTCTCGTCAAAGGCTTCTCTGATGAAGGGGCGCCCTCGTTATCTTTCCTCCTCTCC
Silene conica	2	cp	AAGCCGGACAACTCACAACTTTAA	18-9	Silene_conica_mito_10	120625	A>G	AAGAGAGTTATCTGAATAGAATATAAGGAAGACTTCTAAGTCCTAGCCAGTCTTTTTAGAGACTCCGCTGCTGGTTCTTAGGGGAGTTCCTATATTATAGGTGGCAAGTCTAATTCTGTATTAAACAAGACAATAGTACTAAAAGAATTCTCGTCAAAGGCTTCTCTGATGAAGGGGCGCCCTC
Silene conica	2	cp	AATTGCTTTCGCCTACGTTCACGC	9-9	Silene_conica_mito_10	120625	A>G	AGAAAAGGAAAGAAGAGAGTTATCTGAATAGAATATAAGGAAGACTTCTAAGTCCTAGCCAGTCTTTTTAGAGACTCCGCTGCTGGTTCTTAGGGGAGTTCCTATATTATAGGTGGCAAGTCTAATTCTGTATTAAACAAGACAATAGTACTAAAAGAATTCTCGTC
Silene conica	2	cp	AAAGATTAGAGTCATTGATTCTAG	14-3	Silene_conica_mito_10	120625	A>G	CGATCGACTAAGAAAAGGAAAGAAGAGAGTTATCTGAATAGAATATAAGGAAGACTTCTAAGTCCTAGCCAGTCTTTTTAGAGACTCCGCTGCTGGTTCTTAGGGGAGTTCCTATATTATAGGTGGCAAGTCTAATTCTGTATTAAACAAGACAATAGTACTAAAAGAATTCTCGTCAAAGGCTTCTCTGATGAAGGGG
Silene conica	2	cp	CGTAAGCTAAGATTGCATATCGCA	12-11	Silene_conica_mito_10	120625	A>G	AGTCCTAGCCAGTCTTTTTAGAGACTCCGCTGCTGGTTCTTAGGGGAGTTCCTATATTATAGGTGGCAAGTCTAATTCTGTATTAAACAAGACAATAGTACTAAAAGAATTCTCGTCAAAGGCTTCTCTGATGAAGGGGCGCCCTCGTTATCTTTCCTCCTCTCCTTAGCGCCTTAGTCTTTCCTATCTCCTATCGCTAGCGTTCGACCTCTTTCAACAGTAAAGTCAAGTC
Silene conica	2	cp	CTGCTTTAAATATCTGCAGAAATG[R2]	10-8	Silene_conica_mito_10	120625	A>G	TTTAGAGACTCCGCTGCTGGTTCTTAGGGGAGTTCCTATATTATAGGTGGCAAGTCTAATTCTGTATTAAACAAGACAATAGTACTAAAAGAATTCTCGTCAAAGGCTTCTCTGATGAAGGGGCGCCCTCGTT
Silene conica	2	cp	GGGTAGCACCTTTAGCTGGGAAGT	13-5	Silene_conica_mito_10	120625	A>G	AGACTTCTAAGTCCTAGCCAGTCTTTTTAGAGACTCCGCTGCTGGTTCTTAGGGGAGTTCCTATATTATAGGTGGCAAGTCTAATTCTGTATTAAACAAGACAATAGTACTAAAAGAATTCTCGTCAAAGGCTTCTCTGATG
Silene conica	3	cp	GCTTACACGGCATCGCGAAGGCAT[R1]	17-13	Silene_conica_mito_10	120625	A>G	AGGTGTTCGTCCGATCGACTAAGAAAAGGAAAGAAGAGAGTTATCTGAATAGAATATAAGGAAGACTTCTAAGTCCTAGCCAGTCTTTTTAGAGACTCCGCTGCTGGTTCTTAGGGGAGTTCCTATATTATAG
Silene conica	3	cp	ATAATAAAGAAACATTGAGCTCAC[R2]	12-4	Silene_conica_mito_10	120625	A>G	CGATCGACTAAGAAAAGGAAAGAAGAGAGTTATCTGAATAGAATATAAGGAAGACTTCTAAGTCCTAGCCAGTCTTTTTAGAGACTCCGCTGCTGGTTCTTAGGGGAGTTCCTATATTATAGGTGGCAAGTCT
Silene conica	3	cp	AAGGCGCAATATTAATTAGTAGAG	17-12	Silene_conica_mito_10	120625	A>G	CAGTCTTTTTAGAGACTCCGCTGCTGGTTCTTAGGGGAGTTCCTATATTATAGGTGGCAAGTCTAATTCTGTATTAAACAAGACAATAGTACTAAAAGAATTCTCGTCAAAGGCTTCTCTGATGAAGGGGCGCCCTCGTTATCTTTCCTCCTCTCCTTAGCGCCTTAGTCTTTCCTATCTCCT
Silene conica	3	cp	ACACTGCGATCGGTATTCGGCCAT	17-9	Silene_conica_mito_10	120625	A>G	TTCCTATAAGTAGGTCCATACGGCGAGGGCTCTAATGAGGTGTTCGTCCGATCGACTAAGAAAAGGAAAGAAGAGAGTTATCTGAATAGAATATAAGGAAGACTTCTAAGTCCTAGCCAGTCTTTTTAGAGACTCCGCTGCTGGTTCTTAGGGGAGTTCCTATATTATAGGTGGCAAGTCTAATTCTGTATTAAACAAGACAATAGTACTAAAAGAATTCTC
Silene conica	3	cp	ACCGAAATTGAAGTACTATGCAGT	17-7	Silene_conica_mito_10	120625	A>G	GGCTCTAATGAGGTGTTCGTCCGATCGACTAAGAAAAGGAAAGAAGAGAGTTATCTGAATAGAATATAAGGAAGACTTCTAAGTCCTAGCCAGTCTTTTTAGAGACTCCGCTGCTGGTTCTTAGGGGAGTTCCTATATTATAGGTGGCAAGTCTAATTCTGTATTA
Silene conica	3	cp	CTCCTTGGGACCTTCAAACTGATT	14-5	Silene_conica_mito_10	120625	A>G	AAAAGGAAAGAAGAGAGTTATCTGAATAGAATATAAGGAAGACTTCTAAGTCCTAGCCAGTCTTTTTAGAGACTCCGCTGCTGGTTCTTAGGGGAGTTCCTATATTATAGGTGGCAAGTCTAATTCTGTATTAAACAAGACAA
Silene conica	3	cp	GACACCAAAGCTTTCCGTGCTTGA	17-12	Silene_conica_mito_10	120625	A>G	CATACGGCGAGGGCTCTAATGAGGTGTTCGTCCGATCGACTAAGAAAAGGAAAGAAGAGAGTTATCTGAATAGAATATAAGGAAGACTTCTAAGTCCTAGCCAGTCTTTTTAGAGACTCCGCTGCTGGTTCTTAGGGGAGTTCCTATATTATAGGTGGCAAGTCTAATTCTG
Silene conica	3	mt	AAATAGGAAGACCGTCCATCTCTT[R1]	19-18	Silene_conica_mito_10	120625	A>G	TTTTTAGAGACTCCGCTGCTGGTTCTTAGGGGAGTTCCTATATTATAGGTGGCAAGTCTAATTCTGTATTAAACAAGACAATAGTACTAAAAGAATTCTCGTCAAAGGCTTCTCTGATGAAGGGGCGCCCTCG
Silene conica	3	mt	AACCCAGATAATGATAATAATAGA[R2]	12-11	Silene_conica_mito_10	120625	A>G	TGTTCGTCCGATCGACTAAGAAAAGGAAAGAAGAGAGTTATCTGAATAGAATATAAGGAAGACTTCTAAGTCCTAGCCAGTCTTTTTAGAGACTCCGCTGCTGGTTCTTAGGGGAGTTCCTATATTATAGGTG
Silene conica	1	mt	CACAATACTCACCATCTTTTCACA[R2]	17-4	Silene_conica_mito_100	59524	A>C	CCTACGGTCGCTTGTAACCCCCCTTGTCAGTCGTTCGCCCGGGGTTATCTCCTTGGCAGTCGATCCTCGTAAACTCTCCTTTGCTCGAGCCTTTTTCCTCTTTGGGCTTATCTCCCCTCCGGTCGACAGGCTA
Silene conica	3	mt	GGTTGGGAGAGCTACTAAAAAAAA	25-20	Silene_conica_mito_100	59524	A>C	CTGCTCCATCGTACCTCTCCTGTTAGTCGAGCCTAACTCCTCTCCCTCGTACCTCGGTCAATCCCCCTTCGGGCCCTCCCCTTTACAGTCTTCTCCCTGTCTCTACTTTACCTCCTCTCCCTCGTACCTCGGTCAATCCCCCGTCCTGGCTATCTCCCTACGGTCGCTTGTAACCCCCCTTGTCAGTCGTTCGCCCGGGGTTATCTCCTTGGCAGTCGATCCTCGTAAACTCTC
Silene conica	1	cp	AAAATAAAAGATCAACGGCAGTAT[R1]	24-21	Silene_conica_mito_100	59622	A>G	CGAGCCTTTTTCCTCTTTGGGCTTATCTCCCCCCCGGTCGACAGGCTACGCTCCTCTTTCTATATGCTCGAGCCTTTTCTCCTTATCCTCTCCTTACCAGTCGAGCCAATCTCCTAAAGTTCCCACACGGCTA
Silene conica	1	cp	CACTTATTCCATCGTCGGGGAACC[R1]	27-24	Silene_conica_mito_100	59622	A>G	GGGGTTATCTCCTTGGCAGTCGATCCTCGTAAACTCTCCTTTGCTCGAGCCTTTTTCCTCTTTGGGCTTATCTCCCCCCCGGTCGACAGGCTACGCTCCTCTTTCTATATGCTCGAGCCTTTTCTCCTTATCC
Silene conica	3	cp	AGATTCACACACTCAATATTCAAC[R2]	22-21	Silene_conica_mito_100	59622	A>G	CAGTCGATCCTCGTAAACTCTCCTTTGCTCGAGCCTTTTTCCTCTTTGGGCTTATCTCCCCCCCGGTCGACAGGCTACGCTCCTCTTTCTATATGCTCGAGCCTTTTCTCCTTATCCTCTCCTTACCAGTCGA
Silene conica	3	mt	GTCATGATAAAATAAGCCCAAAGC	18-10	Silene_conica_mito_100	59622	A>G	GGGGTTATCTCCTTGGCAGTCGATCCTCGTAAACTCTCCTTTGCTCGAGCCTTTTTCCTCTTTGGGCTTATCTCCCCCCCGGTCGACAGGCTACGCTCCTCTTTCTATATGCTCGAGCCTTTTCTCCTTATCCTCTCCTTACCAGTCGAGCCAATCTCCTAAAGTTCCCACACGGCTACGCTCCTCTTTCTATATGCCCTCT
Silene conica	3	mt	GCAAGACCCCACTTACCGGAGACT	16-15	Silene_conica_mito_101	720	A>G	AGTCACAAAGAACTTGTTCATCTCAGAAACTTCTCTTCTATTATATATATATCTTTATAAAAGAATTTACTTCCGCCCTTCTTGGTGGTCTTAAAGTCTTTTTATATTTGTAAGAGACCCCCATTGTATAAGTATACAGGCAGTGAAAGTTGTTTGAGCCCTCTCTTTCTCGGAGA
Silene conica	1	cp	CACCATGATTACTAGGAGTCATTA	19-7	Silene_conica_mito_101	8784	A>G	CGAGTTCTTCACAGACCTCTCGTATGCACTCGACCTTGTTTCTTTGCTCGACCCCCTCTACCTCACGGTCGAGTCCACAAGTCTCGTTTCTACTCTATCTCCTCGGCCTGTTCTCCCTGCCTCTAGTTGACCTTCCCACTAGCCTTCGACCCCACCCTCCTC
Silene conica	1	cp	CACCTTAGCAGATCTGAAAAAGAA[R1]	24-21	Silene_conica_mito_101	8784	A>G	CTCACGGTCGAGTCCACAAGTCTCGTTTCTACTCTATCTCCTCGGCCTGTTCTCCCTGCCTCTAGTTGACCTTCCCACTAGCCTTCGACCCCACCCTCCTCTTGTATGAACTTGTACCCTCTTATGCAGCCTT
Silene conica	1	cp	AGTCCCTCCGAACTACTTGCCCCC[R2]	27-19	Silene_conica_mito_101	8784	A>G	CTCCTCGGCCTGTTCTCCCTGCCTCTAGTTGACCTTCCCACTAGCCTTCGACCCCACCCTCCTCTTGTATGAACTTGTACCCTCTTATGCAGCCTTGATGATGGGTGATCATTTCTGATATTCTGACTTTTGC
Silene conica	1	mt	CAGCGCCGAATATTTGCCCTCAAT[R1]	13-13	Silene_conica_mito_101	8784	A>G	TTGTTTCTTTGCTCGACCCCCTCTACCTCACGGTCGAGTCCACAAGTCTCGTTTCTACTCTATCTCCTCGGCCTGTTCTCCCTGCCTCTAGTTGACCTTCCCACTAGCCTTCGACCCCACCCTCCTCTTGTAT
Silene conica	1	mt	ACCAAAAATGTATTAATTCCATGC	14-12	Silene_conica_mito_101	8784	A>G	CCTCTCGTATGCACTCGACCTTGTTTCTTTGCTCGACCCCCTCTACCTCACGGTCGAGTCCACAAGTCTCGTTTCTACTCTATCTCCTCGGCCTGTTCTCCCTGCCTCTAGTTGACCTTCCCACTAGCCTTCGACCCCACCCTCCTCTTGTATGAACTTGTACCCTCTTATGCAGCCTT
Silene conica	1	mt	CCACCCTTCTTATCTTCCTGATAA	10-5	Silene_conica_mito_101	8784	A>G	CACGGTCGAGTCCACAAGTCTCGTTTCTACTCTATCTCCTCGGCCTGTTCTCCCTGCCTCTAGTTGACCTTCCCACTAGCCTTCGACCCCACCCTCCTCTTGTATGAACTTGTACCCTCTTATGCAG
Silene conica	1	mt	GACGCCATTAATTCAAATGGCTGA[R2]	12-11	Silene_conica_mito_101	8784	A>G	CTTTGCTCGACCCCCTCTACCTCACGGTCGAGTCCACAAGTCTCGTTTCTACTCTATCTCCTCGGCCTGTTCTCCCTGCCTCTAGTTGACCTTCCCACTAGCCTTCGACCCCACCCTCCTCTTGTATGAACTT
Silene conica	1	mt	CTAGTTTAACGTGCAATAAAATTT	23-16	Silene_conica_mito_101	8784	A>G	GCCTCTCGCCTTCTAGTCTCATCCCTCTCCTTTTCAGTCGAGTTCTTCACAGACCTCTCGTATGCACTCGACCTTGTTTCTTTGCTCGACCCCCTCTACCTCACGGTCGAGTCCACAAGTCTCGTTTCTACTCTATCTCCTCGGCCTGTTCTCCCTGCCTCTAGTTGACCTTCCCACTAGCCTTCGACCCCACCCTCCTCTTGTATGA
Silene conica	1	mt	GCCCAGCAACCTTCTTGTGGGATT	25-19	Silene_conica_mito_101	8784	A>G	CTCCCTGCCTCTAGTTGACCTTCCCACTAGCCTTCGACCCCACCCTCCTCTTGTATGAACTTGTACCCTCTTATGCAGCCTTGATGATGGGTGATCATTTCTGATATTCTGACTTTTGCATAACGATAAAACCAAAGAAAAGAGAAAAGGACGGTATTAAAAGAGACAAAACTCACCCGAGACGCCTTCTTTCGGGCT
Silene conica	2	cp	GCCTATCAATATTGATCTTTCGAA[R1]	14-6	Silene_conica_mito_101	8784	A>G	CCCTCTACCTCACGGTCGAGTCCACAAGTCTCGTTTCTACTCTATCTCCTCGGCCTGTTCTCCCTGCCTCTAGTTGACCTTCCCACTAGCCTTCGACCCCACCCTCCTCTTGTATGAACTTGTACCCTCTTAT
Silene conica	2	cp	TGAGAATAGAGATGGGAATCTGCC[R2]	13-12	Silene_conica_mito_101	8784	A>G	CCTCGGCCTGTTCTCCCTGCCTCTAGTTGACCTTCCCACTAGCCTTCGACCCCACCCTCCTCTTGTATGAACTTGTACCCTCTTATGCAGCCTTGATGATGGGTGATCATTTCTGATATTCTGACTTTTGCAT
Silene conica	2	cp	CATAAAGACAACGTTTTTTATCAA[R1]	13-7	Silene_conica_mito_101	8784	A>G	ATCTCCTCGGCCTGTTCTCCCTGCCTCTAGTTGACCTTCCCACTAGCCTTCGACCCCACCCTCCTCTTGTATGAACTTGTACCCTCTTATGCAGCCTTGATGATGGGTGATCATTTCTGATATTCTGACTTTT
Silene conica	3	cp	CGCTTAGGAATGTCGAATTAATAC[R1]	10-3	Silene_conica_mito_101	8784	A>G	CACTAGCCTTCGACCCCACCCTCCTCTTGTATGAACTTGTACCCTCTTATGCAGCCTTGATGATGGGTGATCATTTCTGATATTCTGACTTTTGCATAACGATAAAACCAAAGAAAAGAGAAAAGGACGGTAT
Silene conica	3	cp	CGTAGACAGCAATTAGACTAATTA[R2]	19-11	Silene_conica_mito_101	8784	A>G	GTCCACAAGTCTCGTTTCTACTCTATCTCCTCGGCCTGTTCTCCCTGCCTCTAGTTGACCTTCCCACTAGCCTTCGACCCCACCCTCCTCTTGTATGAACTTGTACCCTCTTATGCAGCCTTGATGATGGGTG
Silene conica	3	cp	AGAAATATCCTGTAACTTGTGGCT	10-7	Silene_conica_mito_101	8784	A>G	CTCCCGCATACTTTGGACGAGCCTCTCGCCTTCTAGTCTCATCCCTCTCCTTTTCAGTCGAGTTCTTCACAGACCTCTCGTATGCACTCGACCTTGTTTCTTTGCTCGACCCCCTCTACCTCACGGTCGAGTCCACAAGTCTCGTTTCTACTCTATCTCCTCGGCCTGTTCTCCCTGCCTCTAGTTGACCTTCCCACTAGCCTTCGACCCCACCCTCCTCTTGTATG
Silene conica	3	mt	CTTCTTTTGCGTCTTTCTACCCCA	12-11	Silene_conica_mito_101	8784	A>G	TGGACGAGCCTCTCGCCTTCTAGTCTCATCCCTCTCCTTTTCAGTCGAGTTCTTCACAGACCTCTCGTATGCACTCGACCTTGTTTCTTTGCTCGACCCCCTCTACCTCACGGTCGAGTCCACAAGTCTCGTTTCTACTCTATCTCCTCGGCCTGTTCTCCCTGCCTCTAGTTGACCTTCCCACTAGCCTTCGACCCCACCCTCCTCT
Silene conica	3	mt	GATGGCACATGTTGCGGGCTGAAT[R2]	24-14	Silene_conica_mito_101	8784	A>G	ACCTTGTTTCTTTGCTCGACCCCCTCTACCTCACGGTCGAGTCCACAAGTCTCGTTTCTACTCTATCTCCTCGGCCTGTTCTCCCTGCCTCTAGTTGACCTTCCCACTAGCCTTCGACCCCACCCTCCTCTTG
Silene conica	3	mt	AATTGGCAGGCTCATTAACAGCTT	25-10	Silene_conica_mito_101	8784	A>G	CGCATACTTTGGACGAGCCTCTCGCCTTCTAGTCTCATCCCTCTCCTTTTCAGTCGAGTTCTTCACAGACCTCTCGTATGCACTCGACCTTGTTTCTTTGCTCGACCCCCTCTACCTCACGGTCGAGTCCACAAGTCTCGTTTCTACTCTATCTCCTCGGCCTGTTCTCCCTGCCTCTAGTTGACCTTCCCACTAGCCTTCGACCCCACCCTCCTCTTG
Silene conica	3	mt	CCCTAAAATTACCGGTTTGAACTA[R2]	16-6	Silene_conica_mito_101	8784	A>G	ACGGTCGAGTCCACAAGTCTCGTTTCTACTCTATCTCCTCGGCCTGTTCTCCCTGCCTCTAGTTGACCTTCCCACTAGCCTTCGACCCCACCCTCCTCTTGTATGAACTTGTACCCTCTTATGCAGCCTTGAT
Silene conica	3	mt	CGACAGGTGCGTGAAAGATAAACA	26-13	Silene_conica_mito_101	8784	A>G	TACTCTATCTCCTCGGCCTGTTCTCCCTGCCTCTAGTTGACCTTCCCACTAGCCTTCGACCCCACCCTCCTCTTGTATGAACTTGTACCCTCTTATGCAGCCTTGATGATGGGTGATCATTTCTGATATTCTGACTTTTGCATAACGATAAAACCAAAGAAAAGAGAAAAGGACGGT
Silene conica	3	mt	GGTCCACATGAATTCACCAACTTC[R2]	18-11	Silene_conica_mito_101	8784	A>G	AGTCCACAAGTCTCGTTTCTACTCTATCTCCTCGGCCTGTTCTCCCTGCCTCTAGTTGACCTTCCCACTAGCCTTCGACCCCACCCTCCTCTTGTATGAACTTGTACCCTCTTATGCAGCCTTGATGATGGGT
Silene conica	3	mt	TGGCGCTAATCCTTTGCCTAATAC	15-12	Silene_conica_mito_101	8784	A>G	GAGTTCTTCACAGACCTCTCGTATGCACTCGACCTTGTTTCTTTGCTCGACCCCCTCTACCTCACGGTCGAGTCCACAAGTCTCGTTTCTACTCTATCTCCTCGGCCTGTTCTCCCTGCCTCTAGTTGACCTTCCCACTAGCCTTCGACCCCACCCTCCTCTTGTATGAACTTGTACCCTCTTATGCAGCCTT
Silene conica	2	cp	GCACAAATGTAGTACCACCGACCA	14-3	Silene_conica_mito_101	11785	A>C	CTAACAAGCTGGATGAACCCTAAACTCATAGGATGAATTGTACCAAAGCATACTCAATCAACTCTCCTCGCCCGCATACTTTGGACGAGCCTCTTTCCTTAACTTAACAGTCTCACCAGCCCCTCTCCCTATGGTCGAGCATTAAACCCCCCTTGGCACTCGAGCCTTTCT
Silene conica	2	cp	GTTTGCTGAGAATAAAAAGAGATC[R1]	12-3	Silene_conica_mito_101	11785	A>C	TTCCACTCAGCCTAACAAGCTGGATGAACCCTAAACTCATAGGATGAATTGTACCAAAGCATACTCAATCAACTCTCCTCGCCCGCATACTTTGGACGAGCCTCTTTCCTTAACTTAACAGTCTCACCAGCCC
Silene conica	3	cp	CTCAAGACGTGTGCTCCACCTTCT	10-7	Silene_conica_mito_101	11785	A>C	TCCACTCAGCCTAACAAGCTGGATGAACCCTAAACTCATAGGATGAATTGTACCAAAGCATACTCAATCAACTCTCCTCGCCCGCATACTTTGGACGAGCCTCTTTCCTTAACTTAACAGTCTCACCAGCCCCTCTCCCTATGGTCGAGCATTAAACCCCCCTT
Silene conica	1	mt	AAATAAAAGAATATGCGTAAAACC	16-11	Silene_conica_mito_101	37911	A>G	TAATCTTCGTATTCTTTTCCTCGTTGTGAGGCAGGATCCTACTTCCACATTCTTATATACATATATAGTAATGATGCTGTTTTCACGTAAAAAGGTAAGATTAAGGATTTAGCCTCGTCTGCTAAGTAGAGTAGAGA
Silene conica	1	mt	AGTGAATAATGCCGGTCAGAACTA[R2]	27-15	Silene_conica_mito_101	37911	A>G	CGGATGCCCCGTCTTCTTCCGCTTGGAAAGGATTCCTACCAGCATCTTCCGAAGGGAGCTTCTCTTCAGCTTCCTCGGTGTCTTCTTCTTGTTAATCTTCGTATTCTTTTCCTCGTTGTGAGGCAGGATCCTA
Silene conica	2	cp	ACAGCACACCCTGTAGCCCGGAAT[R1]	14-12	Silene_conica_mito_101	37911	A>G	CATAATGGAACGGATGCCCCGTCTTCTTCCGCTTGGAAAGGATTCCTACCAGCATCTTCCGAAGGGAGCTTCTCTTCAGCTTCCTCGGTGTCTTCTTCTTGTTAATCTTCGTATTCTTTTCCTCGTTGTGAGG
Silene conica	3	mt	AAGTACCACAATTCCAGGTAAACA	21-20	Silene_conica_mito_101	37911	A>G	AAGAAATAGTAAAACAGAGAAACAAAAGGGACAAGTAAAGTCATAATGGAACGGATGCCCCGTCTTCTTCCGCTTGGAAAGGATTCCTACCAGCATCTTCCGAAGGGAGCTTCTCTTCAGCTTCCTCGGTGTCTTCTTCTTGTTAATCTTCGTATTCTTTTCCTCGTTGTGAGGCAGGATCCTACTTCCACATTCTTATATACATATATAGTAATGATGCT
Silene conica	3	mt	ACATCCCAGATTAGTGCAAGTGTG	16-10	Silene_conica_mito_101	46473	A>G	TTGGCCCTAGTTTATGTAGTTTTTATTGTATCAATTTAACGCTTGATCGCACACATCAATTTGACATAAAACCCCCTTGCTTGCCCGGGGAGTAGCTTAAATCTTTTCTTCCTCCTCCAACAAGAGAAGCACCATCAACAAAAGTGGAATACGATGAAGCTGAAGAAGACGAGGAAGA
Silene conica	3	mt	AGCTTATATAACTCGCGTTGCGAG[R1]	14-14	Silene_conica_mito_101	46473	A>G	AAGATGCTCTATTTGGCCCTAGTTTATGTAGTTTTTATTGTATCAATTTAACGCTTGATCGCACACATCAATTTGACATAAAACCCCCTTGCTTGCCCGGGGAGTAGCTTAAATCTTTTCTTCCTCCTCCAAC
Silene conica	1	mt	CAACGTCGACACGTAGCACCACTC	25-21	Silene_conica_mito_102	32196	A>G	TAGTAAGTGACAGCCTCACCTTAAAAGCTTCCCCCGCCGCGTCCGTCAAACCCAGAGTATTGCGCTGCCGCTGCCCACAAGCTTGCCTCTTTGATTGAAAACCACCCTAGCTGTTTGTTAGAGTACCGGGGCATTTCCTCTTTTGTTTAGTCGAACGCTGCAGTTTTAGTTTCACCTCGGAGCAACGGGGCTTGATCATCGAGAGACGCCTTTTACGTGGAT
Silene conica	2	cp	AATAGCCCAGATATAGCCAGATCA[R1]	9-6	Silene_conica_mito_103	3774	A>G	TAATAATTTTTATGATTCGTTTACATAAAATACAGTTTGAGACGCTGTTCTGCCTTCGACCCCTTCCTCCTTAGAGGGGCTCTCTACGAAACGAACCACCCACGAAAAGACCACAATCCTACCAGCGAGAAAG
Silene conica	3	mt	AACAATTTATAGTTAAAATTAGAT[R1]	19-11	Silene_conica_mito_103	4931	A>G	GGTTCTCTTTTTTTGTCAAGAATCCCCCAGCTCGGTAAAATCGGACAAGAAAAGAAAGGAGAAAGGCTCGGTTGAAGCATGGAGCCGAGAAGAGGGTCGGGTGCTAAGTGGGGTCGAGTGAATACGAAAGGGG
Silene conica	3	cp	AGGCAAGCCCATCTGACTCAATGT[R1]	10-5	Silene_conica_mito_103	11761	A>G	CCCTGTCCTAACCTTCTTGTAGGTACGCTACTACAGCTACTAATACTATTACATCTTATGGGTCTTTTCTTGCAGCGAACAATTCTTCAGTTTGCCCAATTACCGCGTCTCAAGCAAGGGAGCTTTCTAGGAG
Silene conica	3	mt	AGCCAACTTTGACCAGGTTCCCCC	24-11	Silene_conica_mito_103	11761	A>G	TGTAGGTACGCTACTACAGCTACTAATACTATTACATCTTATGGGTCTTTTCTTGCAGCGAACAATTCTTCAGTTTGCCCAATTACCGCGTCTCAAGCAAGGGAGCTTTCTAGGAGGGGCTTGAAAATGAAGATGAGCCCTGCGCTTATGTTTATGGGATAAGACTTCTTCCTCCAGTGAAGTGAACTCGCTGACTATTTACTGTTACGTCCGTAA
Silene conica	2	cp	CGCAGATTACCTGCCACCTGCACA	17-5	Silene_conica_mito_103	23057	A>T	AATAGTTGTCAAATTCCTCTGACTTTACCATTATACGCTAAAGCAAGCTGCGCCCGTATCGGCATCCGTTCCACCCAACCTCAACAAAAGCAGGATCATAGAAAGACCGCTCATAACAGAGGGCCAAGCTTGGTATGAATCCGTCAGATGAACTCTCCAAAGCCCGGCTGCTCCCTA
Silene conica	2	cp	GAAGGCCCAAAATTCCCGGCCTCA	13-6	Silene_conica_mito_104	36946	A>G	CCAAGGCTAGGCATATAAAGAAGACGGGTATTCTTCTCCCTTAATCTCAGGTGTCTGACGGAGCTCCTCCTCGGCTCCTTTACAAAGTAGGTAGCTTGGGTCTGAATACTCATAGACCAAGAGTCTAGTGAAAGTTTGTTTTGTATTGTTTTTAGGCTAATTATCTCCTCTCTTATACTGACTTATACTT
Silene conica	3	cp	CCCCGTGGCGGTTAAGCCACTACG	12-10	Silene_conica_mito_105	12746	A>T	AACTCGAGCTGCTGAGTTTTGGAAATGAAGTTTTAACTAGGAGCGGCTGAAAAAGGGGTTCTTTATAGAAAGAAGAAGGGACTCCCTCTTAAATAGGTATGTGAATTGAACACCTCGGAAAGACAGG
Silene conica	1	cp	AAACTAGCTACTCCAACTCATGAC[R2]	13-9	Silene_conica_mito_105	23945	A>G	ATATAAGGAGTCGTCTCTGAGCCCTTGTCCACTGCGAAGACGAAAGAAATCTTTTCGTAGCATCTGGTTGGTTGACGCCGTCGAATTTAATTTCTAATCAAAGAGGCGGGGCTTATTGCTGTTATATAACTAC
Silene conica	1	mt	AGAGCTACCAACCATTCACAAAAT	23-11	Silene_conica_mito_105	23945	A>G	ATAAGGAGTCGTCTCTGAGCCCTTGTCCACTGCGAAGACGAAAGAAATCTTTTCGTAGCATCTGGTTGGTTGACGCCGTCGAATTTAATTTCTAATCAAAGAGGCGGGGCTTATTGCTGTTATATAACTACTATAAAGATAAGAAATAGAAGAAGAGCGGTCTTTCCGGTAAGGTTTTGTAAAGAAGCTCCCGTACTATAGTCATATAGAAAGAAACTCTACCTA
Silene conica	1	mt	ATAACATGAGGGCACGAGTTTTAT[R1]	14-14	Silene_conica_mito_105	23945	A>G	TATTTATATAAGGAGTCGTCTCTGAGCCCTTGTCCACTGCGAAGACGAAAGAAATCTTTTCGTAGCATCTGGTTGGTTGACGCCGTCGAATTTAATTTCTAATCAAAGAGGCGGGGCTTATTGCTGTTAT
Silene conica	1	mt	GCCGCCATAGAAGGGCACATCAAC[R1]	15-12	Silene_conica_mito_105	23945	A>G	AGCATCTGGTTGGTTGACGCCGTCGAATTTAATTTCTAATCAAAGAGGCGGGGCTTATTGCTGTTATATAACTACTATAAAGATAAGAAATAGAAGAAGAGCGGTCTTTCCGGTAAGGTTTTGTAAAGAAGCT
Silene conica	2	cp	AGGCCGGTAACTTCCAACTGAAAT	18-11	Silene_conica_mito_105	23945	A>G	GTCCCCTCTTTCTAATGTGCAAAGAAAGTGAGTGGTTCAATACCTTTGCTTTGCCTTTTCCTCTTATTTATATAAGGAGTCGTCTCTGAGCCCTTGTCCACTGCGAAGACGAAAGAAATCTTTTCGTAGCATCTGGTTGGTTGACGCCGTCGAATTTAATTTCTAATCAAAGAG
Silene conica	3	cp	AACAAAGCTAATAGTCAGCATATA[R1]	9-7	Silene_conica_mito_105	23945	A>G	CTTTTCCTCTTATTTATATAAGGAGTCGTCTCTGAGCCCTTGTCCACTGCGAAGACGAAAGAAATCTTTTCGTAGCATCTGGTTGGTTGACGCCGTCGAATTTAATTTCTAATCAAAGAGGCGGGGCTTATTG
Silene conica	3	cp	CGAGAAATTGAACTCGTCAAATAC[R1]	13-6	Silene_conica_mito_105	44996	A>G	CACAAGAAATTCTTATATGCATATATCTGAATCCTTGGACTCGGGGCGCTTTCCAGCCAGGGGGTCTATGAGTGAGATGAAAGCAAGCGCAAAAAAAAAAGACATCTTTTTCATATAAGTAGATAAGAGTCTA
Silene conica	3	cp	AACTATCACAAAGTAGTAAGAATT[R2]	19-16	Silene_conica_mito_106	9454	A>G	GCTAAATCTGCAGTCTAGAGTTAAGGAGTGCCCTAGTTAAACGGAATCCTTCTAGTTTTTCTTTATAGTTGTGCTATAGTTTTCGTGGAATCCCCTTAAGGAAGGAGAGCTTGGGTCAACGAGTGCCCTGTCT
Silene conica	3	mt	AAGCGCCCTAATACACAGGATAGG	24-18	Silene_conica_mito_107	15695	A>G	CAAAGTGTGATTGATCTTACTAACGTATATTATAGCTAGCGCACTGCACTTGCCAACGCGCCACCCTGTACATTGTGTCATTCTTCAAAATTCTTATAATTATAAGACAGCTCGGAACAAAGCATTCTACCCCAACCTATTGTATTAGAAAGAAAGTCATGTTCGCCCAACTACGTTTGATCAAA
Silene conica	1	mt	CCCTACATACCCTAAAAAGAGCAT[R2]	22-15	Silene_conica_mito_107	19597	A>G	GATGGTCCAAGGTCTTTACCTACAAGATACGTACTAGAAGCCCTTACACGGGAGCCTTTCTTGCTTCCATGCGGCAAGGATATCCCCCTTTTTATACTCTAAACTTCCTCTCTGTGGGAATTGAAACATTCTT
Silene conica	2	cp	CACCATAGCCCGTAAACCGACAAA[R1]	11-7	Silene_conica_mito_107	19597	A>G	TACTAGAAGCCCTTACACGGGAGCCTTTCTTGCTTCCATGCGGCAAGGATATCCCCCTTTTTATACTCTAAACTTCCTCTCTGTGGGAATTGAAACATTCTTATACTAGTAGAATACAGCCTTATCTGGGACC
Silene conica	3	mt	AATCTCACTAAGCCAGACAAAGCC[R1]	19-14	Silene_conica_mito_107	19597	A>G	ACGTACTAGAAGCCCTTACACGGGAGCCTTTCTTGCTTCCATGCGGCAAGGATATCCCCCTTTTTATACTCTAAACTTCCTCTCTGTGGGAATTGAAACATTCTTATACTAGTAGAATACAGCCTTATCTGGG
Silene conica	1	mt	AGACAAGATCATTTCTGCTCGAAA[R2]	14-14	Silene_conica_mito_107	23549	A>G	AAAGTCCCTTTCGAGAACAAGAGCCCCCCTTTCCTCTCTTTGCTAACTAGTTGCCAATCCCCGCTCCATCCTTCACGCAATCTCCTTACTTATGGATTAGAGCATTTCGAGTTGCTTTCTCTTGTCTTAATTT
Silene conica	3	cp	AATTTTAAAGCCGTTCTCCGCGTT	11-3	Silene_conica_mito_107	23549	A>G	AGAAGCTAGTCGAACGTGAAAACGAAGTGAGGCAGCATCAAAAGTCCCTTTCGAGAACAAGAGCCCCCCTTTCCTCTCTTTGCTAACTAGTTGCCAATCCCCGCTCCATCCTTCACGCAATCTCCTTACTTATGGATTAGAGCATTTCGAGTT
Silene conica	3	cp	AACTCAAACTCGGGCTGACCATCC[R1]	9-7	Silene_conica_mito_107	34491	A>G	CATAAGTAGCAAAGTCACAAAAAGTCCAAAGAAGGGGGGGCGATAGAACTAAGAGGACCAAGAGAAGAGTCAGCTTGCTAACTTCCATAAGAAGAAGGCGCATACGAAGGGAAAGAGTTTGTTCGTTTCTCAG
Silene conica	3	cp	GGGATCTATTATGGGCCGAAGACT[R2]	9-7	Silene_conica_mito_107	34491	A>G	CCTTTTCATAAGTAGCAAAGTCACAAAAAGTCCAAAGAAGGGGGGGCGATAGAACTAAGAGGACCAAGAGAAGAGTCAGCTTGCTAACTTCCATAAGAAGAAGGCGCATACGAAGGGAAAGAGTTTGTTCGTT
Silene conica	3	mt	AACTGAGTTGTTACGCAGAATCTT[R1]	28-12	Silene_conica_mito_107	34491	A>G	AATAGGTCGAAGCCGTGGAATAGCCATGAATAGGCATCATCTTTTATTATGCCCTTTTCATAAGTAGCAAAGTCACAAAAAGTCCAAAGAAGGGGGGGCGATAGAACTAAGAGGACCAAGAGAAGAGTCAGCT
Silene conica	1	mt	CAGTTATCTTGAGCATAGGAAAAT[R1]	20-18	Silene_conica_mito_107	34626	A>G	AAAGAGTTTGTTCGTTTCTCAGTAGTGGATAGAGGGCTGTCTTTCTTTTCTCGAATAGCGTACCCATATATAAGAATGAAGCAGCATCTTAGACTTTGCACCCGTTCTCGAAGCCTCTTTCTTTTTTCCTGGG
Silene conica	1	mt	ATTAACCAAAAATAAGCTCTCCCG	20-16	Silene_conica_mito_107	34999	A>T	CAAGAATGAGACTCGAGTGCATACGAGAGAAGAGTGAAACGAGGTCGATTTCCAAGGATCAGAGAAGAATTACAAGAGCATCGACAAGCAAGGACCCGGAGGCGAGAGGGCGACTGCCAAGGAGACGGGGTGAAGACTGACAAAGGAAGGAGAGGTTTAAAAAGCTCGTCTTCA
Silene conica	1	cp	AGAGTCTACTCATTCAACCTGACT[R1]	28-13	Silene_conica_mito_108	8526	A>G	TCGGCGGAGCCCCCTTATTTCCTCCACTTCATGCTTCAGCGGAGCCTCCTAATTTCCTCCACCTCGTACCTCGGCAGAGCCTCCTTATCTCCTTTAAAGGTACGTGCTGAGCCGAGTGCTTCTAGAATAA
Silene conica	3	cp	AAAGTTTCCATCACTCAAGCTTAA[R2]	12-11	Silene_conica_mito_108	8526	A>G	CAAAGGTCCTCCCCCCTCCACCTCGTACCTCGGCGGAGCCCCCTTATTTCCTCCACTTCATGCTTCAGCGGAGCCTCCTAATTTCCTCCACCTCGTACCTCGGCAGAGCCTCCTTATCTCCTTTAAAGGTACG
Silene conica	3	mt	GGACTCGAACACTCGCTAGGATCT[R1]	17-13	Silene_conica_mito_108	8526	A>G	CAAAGGTCCTCCCCCCTCCACCTCGTACCTCGGCGGAGCCCCCTTATTTCCTCCACTTCATGCTTCAGCGGAGCCTCCTAATTTCCTCCACCTCGTACCTCGGCAGAGCCTCCTTATCTCCTTTAAAGGTACG
Silene conica	3	mt	GCGTGTCTCAACTAGGACATACAC[R2]	12-8	Silene_conica_mito_108	16728	A>G	TGTAATGGAGAAGATGCTGTGAAAGACGTATGTATTGGAGTCATTGCTTATCCTTGGAATTGTGAATCCTCTACTATGAAGAAAGTTGACCCTAACTTGTCGGAGATGCATAGAGTCACTTCTGCTTTACCTT
Silene conica	1	cp	CCGTTTAATAAACTGTCATGTCAT[R2]	24-17	Silene_conica_mito_108	27229	C>A	CGTTAAGTATTAGCGTATCAATTAGAAGCTCCCCGTCCCCGAGAAAGACGAAACCGAAGTAGACGGTGGTGGGTGGAAAAGTAAGGACGCTAGTTAGGTCGATCTGACTCTAGATTATATAGCAGCATGTTAG
Silene conica	1	mt	AAGCAATAAAGGTTCCGCCCACCC	24-16	Silene_conica_mito_108	27229	C>A	TCCCTCTAGGAGTAAGGACATTCTCCCAACCAGCTTTTATGGAGAGGCGTTTACTGTCTGTTCTGATAGATAAGAGTAAGGGGAGGGAGAAGAACGTTAAGTATTAGCGTATCAATTAGAAGCTCCCCGTCCCCGAGAAAGACGAAACCGAAGTAGACGGTGGTGGGTGGAAAAGTAAGGACGCTAGTTAGGTCGATCTGACTCTAGATTATA
Silene conica	1	mt	ACAGCCTAAGAATAAAAAATAATG	24-13	Silene_conica_mito_108	27229	C>A	TAAGGGGAGGGAGAAGAACGTTAAGTATTAGCGTATCAATTAGAAGCTCCCCGTCCCCGAGAAAGACGAAACCGAAGTAGACGGTGGTGGGTGGAAAAGTAAGGACGCTAGTTAGGTCGATCTGACTCTAGATTATATAGCAGCATGTTAGTCCTAAAATGTACATTGACAAGTCTTCATATATAAGAAAGGAAAGAGAAAAATGCCTATTCTTAAAAGTAACTT
Silene conica	3	mt	AGCGCCTATAGATTGCCGAATAAA	28-17	Silene_conica_mito_108	27229	C>A	AAGAGTAAGGGGAGGGAGAAGAACGTTAAGTATTAGCGTATCAATTAGAAGCTCCCCGTCCCCGAGAAAGACGAAACCGAAGTAGACGGTGGTGGGTGGAAAAGTAAGGACGCTAGTTAGGTCGATCTGACTCTAGATTATATAGCAGCATGTTAGTCCTAAAATGTACATTGACAAGTCTTCATATATAAGAAAGGAAAGAGAAAAAT
Silene conica	1	cp	CACGACCACATCTTCAATAAATAG	28-22	Silene_conica_mito_109	273	C>T	AGGTTAGGAAGATTGACTTTTCTATGTCTTTGGAAATCCGCGCTTACCAATGCAGAGAACAGGACGAGGAAGACGTCGAAGCAGACGTGAGTGTGCCCAGGAAGTAGTTGAGCATGAGAATGGGGCTAAGACTGCCCCGCTTTGAACTCACTTTTCGAAGAAAGACTTAGTAAAAGACGCCTTTTTTATGTTTCTAAAGTGCCCGACTTAGGCTCAATAACGAGATG
Silene conica	1	mt	ACCTGGACCTAAGATGTTGAGAAT	16-10	Silene_conica_mito_109	273	C>T	GGAAGATTGACTTTTCTATGTCTTTGGAAATCCGCGCTTACCAATGCAGAGAACAGGACGAGGAAGACGTCGAAGCAGACGTGAGTGTGCCCAGGAAGTAGTTGAGCATGAGAATGGGGCTAAGACTGCCCCGCTTTGAACTCACTTTTCGAAGAAAG
Silene conica	1	mt	ATACGAGATCCTGGCACAAACCAT	20-8	Silene_conica_mito_109	273	C>T	AAAGGTTAGGAAGATTGACTTTTCTATGTCTTTGGAAATCCGCGCTTACCAATGCAGAGAACAGGACGAGGAAGACGTCGAAGCAGACGTGAGTGTGCCCAGGAAGTAGTTGAGCATGAGAATGGGGCTAAGACTGCCCCGCTTTGAACTCACTTTTCGAAGAAAGACTTAGTAAAAGACGCCTTTTTTATG
Silene conica	1	mt	CCGAACAAATCCCGCCAATCGAAA	14-11	Silene_conica_mito_109	273	C>T	AGTGTGCCCAGGAAGTAGTTGAGCATGAGAATGGGGCTAAGACTGCCCCGCTTTGAACTCACTTTTCGAAGAAAGACTTAGTAAAAGACGCCTTTTTTATGTTTCTAAAGTGCCCGACTTAGGCTCAATAACGAGATGAGCTTACTTACCCTCTTTTTGCTGGCACTCTTACTATGTGGATCAAGTTTGACCATAATGAGAGGATTTACATAAAGGGAAGGG
Silene conica	1	mt	CTGGTCCTGCTTTGCCCCTATGTC[R2]	21-21	Silene_conica_mito_109	273	C>T	ACGTGAGTGTGCCCAGGAAGTAGTTGAGCATGAGAATGGGGCTAAGACTGCCCCGCTTTGAACTCACTTTTCGAAGAAAGACTTAGTAAAAGACGCCTTTTTTATGTTTCTAAAGTGCCCGACTTAGGCTCAA
Silene conica	1	mt	GCAGTCATATACTCTCGATAAGAT	32-17	Silene_conica_mito_109	273	C>T	AATCCGCGCTTACCAATGCAGAGAACAGGACGAGGAAGACGTCGAAGCAGACGTGAGTGTGCCCAGGAAGTAGTTGAGCATGAGAATGGGGCTAAGACTGCCCCGCTTTGAACTCACTTTTCGAAGAAAGACTTAGTAAAAGACGCCTTTTTTATGTTTCTAAAGTGCCCGACTTAGGCTCAATAACGAG
Silene conica	2	cp	GCCCAAGGGGTTTAAAAGCACAAA	16-7	Silene_conica_mito_109	273	C>T	AAATAAAGAGAAAGAAAGGTTAGGAAGATTGACTTTTCTATGTCTTTGGAAATCCGCGCTTACCAATGCAGAGAACAGGACGAGGAAGACGTCGAAGCAGACGTGAGTGTGCCCAGGAAGTAGTTGAGCATGAGAATGGGGCTAAGACTGCCCCGCTTTGAACTCACTTTTCGAAGAAAGACTTAG
Silene conica	2	cp	GTATCAGGAAAATACGACGAGAGT[R1]	18-7	Silene_conica_mito_109	273	C>T	CCCAGGAAGTAGTTGAGCATGAGAATGGGGCTAAGACTGCCCCGCTTTGAACTCACTTTTCGAAGAAAGACTTAGTAAAAGACGCCTTTTTTATGTTTCTAAAGTGCCCGACTTAGGCTCAATAACGAGATGA
Silene conica	3	cp	CCTCCCGTCCGCTCGCTTCATCCT	11-10	Silene_conica_mito_109	273	C>T	TCTATGTCTTTGGAAATCCGCGCTTACCAATGCAGAGAACAGGACGAGGAAGACGTCGAAGCAGACGTGAGTGTGCCCAGGAAGTAGTTGAGCATGAGAATGGGGCTAAGACTGCCCCGCTTTGAACTCACTTTTCGAAGAAAGACTTAGTAAAAGACGCCTTTTTTATGTTTCTAAA
Silene conica	3	cp	TAATCGTTCCTTTTTTAAAAACTT	15-13	Silene_conica_mito_109	273	C>T	AAGAGAAAGAAAGGTTAGGAAGATTGACTTTTCTATGTCTTTGGAAATCCGCGCTTACCAATGCAGAGAACAGGACGAGGAAGACGTCGAAGCAGACGTGAGTGTGCCCAGGAAGTAGTTGAGCATGAGAATGGGGCTAAGACTGCCCCGCTTTGAACTCACTTTTCGAAGAAAGA
Silene conica	3	mt	AAACGTTAATAAAAGGAAAAAAGC[R1]	22-10	Silene_conica_mito_109	273	C>T	AAGCAGACGTGAGTGTGCCCAGGAAGTAGTTGAGCATGAGAATGGGGCTAAGACTGCCCCGCTTTGAACTCACTTTTCGAAGAAAGACTTAGTAAAAGACGCCTTTTTTATGTTTCTAAAGTGCCCGACTTAG
Silene conica	3	mt	ATCGCGACTCCCTTAAGAATTATG[R1]	14-12	Silene_conica_mito_109	273	C>T	AATCCGCGCTTACCAATGCAGAGAACAGGACGAGGAAGACGTCGAAGCAGACGTGAGTGTGCCCAGGAAGTAGTTGAGCATGAGAATGGGGCTAAGACTGCCCCGCTTTGAACTCACTTTTCGAAGAAAGACT
Silene conica	2	cp	AAACTTAGGTCAAGTTTTGGGGAT[R1]	6-3	Silene_conica_mito_109	3223	C>G	CGGCCCGAAACCCTCCTGTCTTTGATGAAGCTCGACTCGTTGGTGCAAAACTACCTCCCAAGTACCCTTCTTGCTTATGTGTATTTACGAACAAATAAACTTAAAGCTGTTTTCTTTTACTTTCTGGCTGGCT
Silene conica	2	cp	CTATTTAGCAGGTAATTCCCAAGA	16-11	Silene_conica_mito_11	30195	C>T	ATCTATTTCTCTTTTTTCTTTTTCAAGTTCAACAACTGCATTTCGTAGAACAGCAGCATTCCTTGAAGGATAGAAACCCGTTAGACGAGAAGGAGAGGATCGGCTGACTTTTCTTATGTATGGAACCTTTGACTTTGAACTGATTTCTTTCCCAAGAGGTCGCGCTGTT
Silene conica	3	mt	GTTGATACAGCGTCGAAAGAAACA[R2]	20-20	Silene_conica_mito_11	88342	A>T	TTGAATAAGCAACTCTTCACTCCAATATAGGGAATCTGTAAAGACAAGGCTGCCCGCTATCCTGCCTTAGAGGCTGTCTTAGTTTATTTGAACTTTCCTGAAGCCTTTATTATTTAAAAAGATTTGAAACTAC
Silene conica	1	cp	AGAGCGAACCGATATCACAACTAT	28-22	Silene_conica_mito_11	104026	A>G	AACCTTGTTTAGCCTAGATGCTTATATGTATGTACGCTCAGGGTCTTCCTTGTGAGATAATCTATGTTATACTTACATTTTTTGAAGGCTAGTCAAGCAAGTCCTGCTTATTGAGATGCGAGATGAGTGAGCTAAATCATTCGACTTTTTTGGAAATACGTTAGTTACAGTTTCGTAGCTGGTTTGTTCTTATGTA
Silene conica	1	mt	ACATCCTGACCAATCTCACAAAAT[R1]	13-11	Silene_conica_mito_11	104026	A>G	TGTCCACGAGAAAGATGGTTCTTTTCTTCTCGTATAATCATATATAAGTCAACCTTGTTTAGCCTAGATGCTTATATGTATGTACGCTCAGGGTCTTCCTTGTGAGATAATCTATGTTATACTTACATTTTTT
Silene conica	1	mt	ACGAATGCCTAATTGCATGCAGAC[R2]	26-20	Silene_conica_mito_11	104026	A>G	ATAAGTCAACCTTGTTTAGCCTAGATGCTTATATGTATGTACGCTCAGGGTCTTCCTTGTGAGATAATCTATGTTATACTTACATTTTTTGAAGGCTAGTCAAGCAAGTCCTGCTTATTGAGATGCGAGATGA
Silene conica	1	mt	ATTAAATTTGAGTTATGTAAATCG[R2]	15-10	Silene_conica_mito_11	104026	A>G	TAGTGGTGTCCACGAGAAAGATGGTTCTTTTCTTCTCGTATAATCATATATAAGTCAACCTTGTTTAGCCTAGATGCTTATATGTATGTACGCTCAGGGTCTTCCTTGTGAGATAATCTATGTTATACTTACA
Silene conica	1	mt	AAGATACCTGCGTTCCGAGCACTA	21-18	Silene_conica_mito_11	104026	A>G	GTACGCTCAGGGTCTTCCTTGTGAGATAATCTATGTTATACTTACATTTTTTGAAGGCTAGTCAAGCAAGTCCTGCTTATTGAGATGCGAGATGAGTGAGCTAAATCATTCGACTTTTTTGGAAATACGTTAGTTACAGTTTCGTAGCTG
Silene conica	2	cp	GACTAAACCTCCTCTCCGCAGGAC	14-10	Silene_conica_mito_11	104026	A>G	TATTGCGGGTAAGCTTCGTATAAGTGTGATCGACCTACCTTCTGTATTGTATTAAGGTATGAGAGACGGCTGCCCCTTCTATTCTTTATTAGTGGTGTCCACGAGAAAGATGGTTCTTTTCTTCTCGTATAATCATATATAAGTCAACCTTGTTTAGCCTAGATGCTTATATGTATGTACGCTCAGGGTCTTCCTTGTGAGATAATCTATGTTATACTTACATTTTTT
Silene conica	3	cp	GACCTGAATGACTATCGCTTCGCA[R1]	16-3	Silene_conica_mito_11	104026	A>G	CCTAGATGCTTATATGTATGTACGCTCAGGGTCTTCCTTGTGAGATAATCTATGTTATACTTACATTTTTTGAAGGCTAGTCAAGCAAGTCCTGCTTATTGAGATGCGAGATGAGTGAGCTAAATCATTCGAC
Silene conica	3	mt	ACCTGGCGACGTGGCCCGGCCCCC	14-14	Silene_conica_mito_11	104026	A>G	ATAAGTCAACCTTGTTTAGCCTAGATGCTTATATGTATGTACGCTCAGGGTCTTCCTTGTGAGATAATCTATGTTATACTTACATTTTTTGAAGGCTAGTCAAGCAAGTCCTGCTTATTGAGATGCGAGATGAGTGAGCTAAATCATTCGACTTTTTTGGAAATACGTTAGTTACAGTTTCGTAG
Silene conica	2	cp	AACGCGATGCAGATAAACCAGCCC	5-5	Silene_conica_mito_110	11571	A>G	CCCGATTCGCCACTGATCTCTTCTTATAGATGGAAAGCCCCCTCTCGTCTGGGTGAAAGAGCCTCGTTTTCGATTGGTAGTAAATCAAAAAAGTAAAGATCTTTTCTAGAGACTACTAAGTTACTGGTGCTACACTCAACATTTCCTTAACTAACTTAAGGACGA
Silene conica	3	mt	GTATCGCGGGCATCCACACCGGCT	27-23	Silene_conica_mito_110	56438	A>G	TTATATTATGCTATGTCTTTCACACACAAACCTACTACTCCGGCTGCTAAATATATATAGAAGAGACCTTCTCCCCTAAATCAAGAGAAGAAAGAGAGAAGAGAGGGGGGAGATTATACAGAAGAAGGAAGATGGCAATGGCAGTAATTTCGGCTTTATGGGGACGGCGACCCTAGTACACGAGA
Silene conica	2	cp	AAAAACCGCCCATGAAAATTGAAA[R1]	13-10	Silene_conica_mito_111	35538	A>G	ACTTGCCGTGCCATCTTTAGTTTAGTGATCATTAATAAGGTAAAGAAAGTGTGTCTAAGGGTTTTCCTCTCTCTTCTTAGCTACGACCAGCCCCCCTCCTTTCTGTCTAGTTGAAGTTTCTTTCTTCTCT
Silene conica	3	cp	TCGTTAATTTGATTCCCCGCAATA	9-8	Silene_conica_mito_111	35538	A>G	CTCTTCTTAGCTACGACCAGCCCCCCTCCTTTCTGTCTAGTTGAAGTTTCTTTCTTCTCTTTATATAGGATAAGAGCCGACGACGAATCCCCGCCCTTTAGCAAGCGGGGTAGAACGGGTGTGAGCTGGCCTATTGCTAGACTTCTTTAAAGCTGCGAAAT
Silene conica	1	cp	CAAGACCTATAGGCGTTACGAAAG[R1]	20-15	Silene_conica_mito_112	40376	A>G	AAGGCTCGGTTGAAGCATGATGCCGAGGAGAGGACGAGGAGAGGGCGGAGTGAGACTGATTTTAGTCGAGCCTGTTTCATTTCTTTGCAAACCAAATAGAGCCCACCTACCATTTTGCTTTCTTTTCATCTCT
Silene conica	1	cp	AGGCCCCCCAAGCACATGGATTCA[R2]	20-18	Silene_conica_mito_112	40376	A>G	AGTGCAAGTAATGAGGAGATAGGCTCGACTAAAAGGAGAAAGAAATGAGACTCGAGTGGTAACGAGAGGAGAAAGGCTCGGTTGAAGCATGATGCCGAGGAGAGGACGAGGAGAGGGCGGAGTGAGACTGATT
Silene conica	1	mt	AATGCGGTGACTAGCCAGCACTTT	23-22	Silene_conica_mito_112	40376	A>G	AGACTCGAGTGGTAACGAGAGGAGAAAGGCTCGGTTGAAGCATGATGCCGAGGAGAGGACGAGGAGAGGGCGGAGTGAGACTGATTTTAGTCGAGCCTGTTTCATTTCTTTGCAAACCAAATAGAGCCCACCTACCATTTTGCTTTCTTTTCATCTCTGCTCTT
Silene conica	1	mt	ACAAAGGCAGAAGCCAAAATTTTA[R1]	23-16	Silene_conica_mito_112	40376	A>G	AGGCTCGACTAAAAGGAGAAAGAAATGAGACTCGAGTGGTAACGAGAGGAGAAAGGCTCGGTTGAAGCATGATGCCGAGGAGAGGACGAGGAGAGGGCGGAGTGAGACTGATTTTAGTCGAGCCTGTTTCATT
Silene conica	1	mt	AATTCCTATACTTCAAGCGCATGA[R2]	23-17	Silene_conica_mito_112	40376	A>G	ATGAGACTCGAGTGGTAACGAGAGGAGAAAGGCTCGGTTGAAGCATGATGCCGAGGAGAGGACGAGGAGAGGGCGGAGTGAGACTGATTTTAGTCGAGCCTGTTTCATTTCTTTGCAAACCAAATAGAGCCCA
Silene conica	2	cp	GACATAACCTGTTAAGCTTAAATG[R1]	9-7	Silene_conica_mito_112	40376	A>G	AGTGGTAACGAGAGGAGAAAGGCTCGGTTGAAGCATGATGCCGAGGAGAGGACGAGGAGAGGGCGGAGTGAGACTGATTTTAGTCGAGCCTGTTTCATTTCTTTGCAAACCAAATAGAGCCCACCTACCATTT
Silene conica	2	cp	CATCCAGAATGACTAATAAAAAAC	10-3	Silene_conica_mito_112	40376	A>G	AGGAGAAAGAAATGAGACTCGAGTGGTAACGAGAGGAGAAAGGCTCGGTTGAAGCATGATGCCGAGGAGAGGACGAGGAGAGGGCGGAGTGAGACTGATTTTAGTCGAGCCTGTTTCATTTCTTTGCAAACCAAATAGAGCCCACC
Silene conica	2	cp	GTTTCTTGAATTTAAGCGGGACCT[R2]	11-7	Silene_conica_mito_112	40376	A>G	AGAGGACGAGGAGAGGGCGGAGTGAGACTGATTTTAGTCGAGCCTGTTTCATTTCTTTGCAAACCAAATAGAGCCCACCTACCATTTTGCTTTCTTTTCATCTCTGCTCTTGCTTTCCCTATGTATTTAGCAG
Silene conica	3	mt	AGATTAGCTGTATATTCGCAAATA[R1]	14-12	Silene_conica_mito_112	40376	A>G	GGCTCGGTTGAAGCATGATGCCGAGGAGAGGACGAGGAGAGGGCGGAGTGAGACTGATTTTAGTCGAGCCTGTTTCATTTCTTTGCAAACCAAATAGAGCCCACCTACCATTTTGCTTTCTTTTCATCTCTGC
Silene conica	3	mt	GCCCAAAGTGCCTGCTGGCGCAGC[R1]	18-16	Silene_conica_mito_112	40376	A>G	CGACTAAAAGGAGAAAGAAATGAGACTCGAGTGGTAACGAGAGGAGAAAGGCTCGGTTGAAGCATGATGCCGAGGAGAGGACGAGGAGAGGGCGGAGTGAGACTGATTTTAGTCGAGCCTGTTTCATTTCTTT
Silene conica	3	mt	CACATTACTCACCCACAATTGACG[R1]	18-16	Silene_conica_mito_112	40376	A>G	TCGAGTGGTAACGAGAGGAGAAAGGCTCGGTTGAAGCATGATGCCGAGGAGAGGACGAGGAGAGGGCGGAGTGAGACTGATTTTAGTCGAGCCTGTTTCATTTCTTTGCAAACCAAATAGAGCCCACCTACCA
Silene conica	1	mt	TCTCGGGAGCACTTAGTAATTGTG	22-11	Silene_conica_mito_112	42016	C>A	TGTTTATATGCGAGCCAACTTCGTCCCTCTTTGAACTTCTCTTTGGCTACAGATTAGACTGACGGGGAGACGGATCTATGGACTCAGCTAGAAAAAAGGTTTGTTAGAATTTCGTGCTTTACCTTTCTTTTCTCTATTCGCCTTTTAGTT
Silene conica	3	cp	CCCAGTGACCGAGGCCCAGAATAA	19-11	Silene_conica_mito_113	1247	A>G	CTTAGTTTGTAACGAATCTTCCAGCCCGGGAAAACGGGACAAGAAAGGCAAGGGATGGGTGCTAGATGGGACAGTCCGTCTGGGTGGTAAGCCCGGGGTGGGTCTAGAGATTGTTGCGGAGAGTTTGCCTTTG
Silene conica	2	cp	AAGCCTCCCACATCCCCGCAACAT	16-3	Silene_conica_mito_113	2993	A>G	AGACTCGACTGTTAACGAGAATAGTAGGAGAAAAGGCTCGAACGTTAGTGATGAGGATAAGGAGGCTCTGCCGAAGTATGAGGTGGAGGACCAGAAATGTAGATGAAAGAGCTCGACCAGAGGTTGAAGGTAAGGGGTGGCGGGATCGCGTGCCAAGGAGACAGGGAGAAGACTCTAGTAACAAAGAGACAAGTAAAGTA
Silene conica	3	mt	ACATCCAGACGCGCAAAGGACAAA[R1]	17-14	Silene_conica_mito_113	2993	A>G	AAGGAGGCTCTGCCGAAGTATGAGGTGGAGGACCAGAAATGTAGATGAAAGAGCTCGACCAGAGGTTGAAGGTAAGGGGTGGCGGGATCGCGTGCCAAGGAGACAGGGAGAAGACTCTAGTAACAAAGAGACA
Silene conica	3	mt	AGGCAAACCCCCCCACGTAGCCGT	21-17	Silene_conica_mito_113	2993	A>G	TGTTAACGAGAATAGTAGGAGAAAAGGCTCGAACGTTAGTGATGAGGATAAGGAGGCTCTGCCGAAGTATGAGGTGGAGGACCAGAAATGTAGATGAAAGAGCTCGACCAGAGGTTGAAGGTAAGGGGTGGCGGGATCGCGTGCCAAGGAGACAGGGAGAAGACTCTAGTAACAAAGAGACAA
Silene conica	3	mt	CTAGTAGTTTCGGAAACGATGGAG	19-14	Silene_conica_mito_113	7147	A>C	TCATACAGAGAGGCATCTTTAGACAGAAAAGTGGCAATGTGAACTGCCTTAGTCTGACTTTTCTTCTCCTCTCGCTAACACCTCCATCCCACAAGTGTCGTTTCTCTAGCTTTTCCCCGGGAAACCACCTGCGTA
Silene conica	3	mt	ATCAAAAAGTATTCCGCTCTCAAT[R2]	30-23	Silene_conica_mito_113	7147	A>C	ACTGCCTTAGTCTGACTTTTCTTCTCCTCTCGCTAACACCTCCATCCCACAAGTGTCGTTTCTCTAGCTTTTCCCCGGGAAACCACCTGCGTACTTCTCCGCTCCCTCTGGTCTTTCTCGTCTCGTATGAACT
Silene conica	3	mt	CAATTAATGAGACACAACGCCACC	18-18	Silene_conica_mito_113	7147	A>C	CTCCATCCCACAAGTGTCGTTTCTCTAGCTTTTCCCCGGGAAACCACCTGCGTACTTCTCCGCTCCCTCTGGTCTTTCTCGTCTCGTATGAACTCGAGCCTTTTTCCTCTTAAAATGCGTGAAATTGATACAATCTAAACGAAGAAACTAGGTCAAAATATAGCACAGGACATGGAGTGGGGTCGGCTAGAAGGGAGAGTTTACGAGGTCGA
Silene conica	2	cp	GGCCCCGCGGAATACGGGAGGAAT	13-6	Silene_conica_mito_113	32503	C>T	AAAAAGAAAGAAAAAGTACGACAGACCAAAGAATGAGCGAATGAGCACTCTACTTAGACGACTTCTACTCGCTCTGATATCGAGCCTTCTACTCGCTCTTCTATAGGAAAAGCTTTACTTTGAACAGTCTCTTACCCGAAGATTAGACGACTTCTCTTGGCTGCAGATTGGACTGATGAAGAGGCGAAGACTTGGCTGACGATGCAACTTCTATAGGGAAGACTCCCTTTG
Silene conica	1	cp	CACAACGATACAGCCCCAACGCCT[R2]	27-20	Silene_conica_mito_113	38171	A>G	CTTGCCAGGGGAACTCGCCTTAGCAAGCAGCACTAGACTTCGCCCCCTTCTCTCTCCTCTCCTATGCAGTCTTCTCCCCGTCTCCTCATCACTTACGTTCGAGCCTCTCTCCTTGGCAGCCGCCCTTTCGCCT
Silene conica	1	cp	CGCAAGGGCACCTAGCAGCCGTGT[R2]	24-22	Silene_conica_mito_113	38171	A>G	TATGGAAGGAAGTTATCAAACTGACTCTTGTCTATTCTCAAGCTGAGTCTTGCCAGGGGAACTCGCCTTAGCAAGCAGCACTAGACTTCGCCCCCTTCTCTCTCCTCTCCTATGCAGTCTTCTCCCCGTCTCC
Silene conica	1	mt	GCAACACGCAAATACTGAACAACT[R2]	21-20	Silene_conica_mito_113	38171	A>G	TCGCCTTAGCAAGCAGCACTAGACTTCGCCCCCTTCTCTCTCCTCTCCTATGCAGTCTTCTCCCCGTCTCCTCATCACTTACGTTCGAGCCTCTCTCCTTGGCAGCCGCCCTTTCGCCTCCGAGTCCTCATCT
Silene conica	1	mt	CGAGTTGTTAAGCGGAAACAAGAG[R2]	14-6	Silene_conica_mito_113	38171	A>G	TCAAACTGACTCTTGTCTATTCTCAAGCTGAGTCTTGCCAGGGGAACTCGCCTTAGCAAGCAGCACTAGACTTCGCCCCCTTCTCTCTCCTCTCCTATGCAGTCTTCTCCCCGTCTCCTCATCACTTACGTTC
Silene conica	2	cp	CGGCACTATATGTGGCGAAATTAT[R2]	18-11	Silene_conica_mito_113	38171	A>G	ACTTTGTCTTCGTATGGAAGGAAGTTATCAAACTGACTCTTGTCTATTCTCAAGCTGAGTCTTGCCAGGGGAACTCGCCTTAGCAAGCAGCACTAGACTTCGCCCCCTTCTCTCTCCTCTCCTATGCAGTCTT
Silene conica	2	cp	AAGAGAATGTACTTCTAAATGAAC[R1]	13-9	Silene_conica_mito_113	38171	A>G	GAACTCGCCTTAGCAAGCAGCACTAGACTTCGCCCCCTTCTCTCTCCTCTCCTATGCAGTCTTCTCCCCGTCTCCTCATCACTTACGTTCGAGCCTCTCTCCTTGGCAGCCGCCCTTTCGCCTCCGAGTCCTC
Silene conica	3	cp	AGGAATTTTTTACTCGATACTCAA	13-7	Silene_conica_mito_113	38171	A>G	TTGCCAGGGGAACTCGCCTTAGCAAGCAGCACTAGACTTCGCCCCCTTCTCTCTCCTCTCCTATGCAGTCTTCTCCCCGTCTCCTCATCACTTACGTTCGAGCCTCTCTCCTTGGCAGCCGCCCTT
Silene conica	3	mt	AAATAAATATCCATCTCGAGAAAC	24-16	Silene_conica_mito_113	38171	A>G	TCGTATGGAAGGAAGTTATCAAACTGACTCTTGTCTATTCTCAAGCTGAGTCTTGCCAGGGGAACTCGCCTTAGCAAGCAGCACTAGACTTCGCCCCCTTCTCTCTCCTCTCCTATGCAGTCTTCTCCCCGTCTCCTCATCACTTACGTTCGAGCCTCTCTCCTTGGCAGCCGCCCTTTCGCCTCCGAG
Silene conica	3	mt	AAATCCCGCCGCTGAAACTAGTTT[R1]	22-17	Silene_conica_mito_113	38171	A>G	TGCCAGGGGAACTCGCCTTAGCAAGCAGCACTAGACTTCGCCCCCTTCTCTCTCCTCTCCTATGCAGTCTTCTCCCCGTCTCCTCATCACTTACGTTCGAGCCTCTCTCCTTGGCAGCCGCCCTTTCGCCTCC
Silene conica	3	mt	CACCCGCGCATAGCTTTCTGTCTA[R2]	19-6	Silene_conica_mito_113	38171	A>G	TGACTCTTGTCTATTCTCAAGCTGAGTCTTGCCAGGGGAACTCGCCTTAGCAAGCAGCACTAGACTTCGCCCCCTTCTCTCTCCTCTCCTATGCAGTCTTCTCCCCGTCTCCTCATCACTTACGTTCGAGCCT
Silene conica	1	cp	CGGCTCATTCAGGACTAAGCACAT	19-11	Silene_conica_mito_115	53070	A>G	TACTCGGATCTCCTCTTCTTTACAATTTAGTAGTAGAATAAGGCAAAGGCTTCTATACCATCTGGAATGGTCGTCTCATAATCTAAGCATGTCCTTGAAGGTTCCCATTAACCCAAGGGTAGCGGGCGTATCATTTTCTCGTACTACTCAGTTTAGGCTGCCCATTATTACTAGAATCGTAGTGGACGATTGCATTCATAGTCTCCATCCACTGACTACG
Silene conica	1	mt	AATCATGCCAACCGCTAAACAGAA[R2]	22-22	Silene_conica_mito_115	53070	A>G	CTTCTTTACAATTTAGTAGTAGAATAAGGCAAAGGCTTCTATACCATCTGGAATGGTCGTCTCATAATCTAAGCATGTCCTTGAAGGTTCCCATTAACCCAAGGGTAGCGGGCGTATCATTTTCTCGTACTAC
Silene conica	1	mt	AAACCTATCTCCGCGATAACATAG	21-13	Silene_conica_mito_115	53070	A>G	AGTAGAATAAGGCAAAGGCTTCTATACCATCTGGAATGGTCGTCTCATAATCTAAGCATGTCCTTGAAGGTTCCCATTAACCCAAGGGTAGCGGGCGTATCATTTTCTCGTACTACTCAGTTTAGGCTGCCCATTATTACTAGAATCGTAGTGGACGATTGCATTCATAGTCTCCATCCACTGACTACGAAGACATAAAGTATTCTTCCTCTGTCCTCT
Silene conica	1	mt	CGAGATCCTGTTGTATCAAACTAA[R2]	12-11	Silene_conica_mito_115	53070	A>G	TACAATTTAGTAGTAGAATAAGGCAAAGGCTTCTATACCATCTGGAATGGTCGTCTCATAATCTAAGCATGTCCTTGAAGGTTCCCATTAACCCAAGGGTAGCGGGCGTATCATTTTCTCGTACTACTCAGTT
Silene conica	2	cp	AAATTAAAAAGACGTATCATTCTA	6-6	Silene_conica_mito_115	53070	A>G	AAAGGCGGGGATAAGGTATTCTTTACTCTATTACGCAACTTCTTGCCGAAGAGCAGCAGTTTTCTGTAATCGAAGCCGTCTTTGAAATACAGTTAGTTACTCGGATCTCCTCTTCTTTACAATTTAGTAGTAGAATAAGGCAAAGGCTTCTATACCATCTGGAATGGTCGTCTCATAATCTAAGCATGTCCT
Silene conica	2	cp	ACGAAACATCCGCGCGCCGCCGTA	13-10	Silene_conica_mito_115	53070	A>G	GGATAAGGTATTCTTTACTCTATTACGCAACTTCTTGCCGAAGAGCAGCAGTTTTCTGTAATCGAAGCCGTCTTTGAAATACAGTTAGTTACTCGGATCTCCTCTTCTTTACAATTTAGTAGTAGAATAAGGCAAAGGCTTCTATACCATCTGGAATGGTCGTCTCATAATCTAAGCATGTCCTTGAAGGTTCCCATTAACCCAAGG
Silene conica	2	cp	ACGAAGGGCCGCTACGTGTGGATT	9-3	Silene_conica_mito_115	53070	A>G	AAGGCTTCTATACCATCTGGAATGGTCGTCTCATAATCTAAGCATGTCCTTGAAGGTTCCCATTAACCCAAGGGTAGCGGGCGTATCATTTTCTCGTACTACTCAGTTTAGGCTGCCCATTATTACTAGAATCGTAGTGGACGATTGCATTCATAGTCTCCATCCACTGACTACGAAGACATAAAGTATTCTT
Silene conica	2	cp	AGGAGTTACAGACCGGGATCGTAG[R2]	18-11	Silene_conica_mito_115	53070	A>G	AAAGGCTTCTATACCATCTGGAATGGTCGTCTCATAATCTAAGCATGTCCTTGAAGGTTCCCATTAACCCAAGGGTAGCGGGCGTATCATTTTCTCGTACTACTCAGTTTAGGCTGCCCATTATTACTAGAAT
Silene conica	2	cp	CCACCCAACACCTGTTTATTGATT	13-7	Silene_conica_mito_115	53070	A>G	TCCTCTTCTTTACAATTTAGTAGTAGAATAAGGCAAAGGCTTCTATACCATCTGGAATGGTCGTCTCATAATCTAAGCATGTCCTTGAAGGTTCCCATTAACCCAAGGGTAGCGGGCGTATCATTTTCTCGTACTACTCAGTTTAGGCTGCCCATTAT
Silene conica	2	cp	AATCGGTCCACAGAATAATTGGAA	5-4	Silene_conica_mito_115	53070	A>G	AAGGCAAAGGCTTCTATACCATCTGGAATGGTCGTCTCATAATCTAAGCATGTCCTTGAAGGTTCCCATTAACCCAAGGGTAGCGGGCGTATCATTTTCTCGTACTACTCAGTTTAGGCTGCCCATTATTACTAGAATCGTAGTGGACGATTGCATTCATAGTCTCCATCCACTGACTACGAAGACATAAAG
Silene conica	2	cp	AGCCAGTGACTATACACCATAAAG[R1]	23-9	Silene_conica_mito_115	53070	A>G	CCGAAGAGCAGCAGTTTTCTGTAATCGAAGCCGTCTTTGAAATACAGTTAGTTACTCGGATCTCCTCTTCTTTACAATTTAGTAGTAGAATAAGGCAAAGGCTTCTATACCATCTGGAATGGTCGTCTCATAA
Silene conica	2	cp	ACGAGAAGGTATCATACCCCGCCA	17-6	Silene_conica_mito_115	53070	A>G	TATACCATCTGGAATGGTCGTCTCATAATCTAAGCATGTCCTTGAAGGTTCCCATTAACCCAAGGGTAGCGGGCGTATCATTTTCTCGTACTACTCAGTTTAGGCTGCCCATTATTACTAGAATCGTAGTGGACGATTGCATTCATAGTCTCCATCCACTGA
Silene conica	3	cp	ACGGAATAAAAGTGAAATAATTCT	14-13	Silene_conica_mito_115	53070	A>G	TACCTTTGAGCTTAAAGGCGGGGATAAGGTATTCTTTACTCTATTACGCAACTTCTTGCCGAAGAGCAGCAGTTTTCTGTAATCGAAGCCGTCTTTGAAATACAGTTAGTTACTCGGATCTCCTCTTCTTTACAATTTAGTAGTAGAATAAGGCAAAGGCTTCTATACCATCTGGAATGGTCGTCTCATAATCTAAGCATG
Silene conica	3	cp	AGGCTTGAAGATCGCGACCTCGCC[R1]	14-6	Silene_conica_mito_115	53070	A>G	TGCCGAAGAGCAGCAGTTTTCTGTAATCGAAGCCGTCTTTGAAATACAGTTAGTTACTCGGATCTCCTCTTCTTTACAATTTAGTAGTAGAATAAGGCAAAGGCTTCTATACCATCTGGAATGGTCGTCTCAT
Silene conica	3	cp	GATGGGCACGAGTAAGTGTGACAA	16-9	Silene_conica_mito_115	53070	A>G	CTCTATTACGCAACTTCTTGCCGAAGAGCAGCAGTTTTCTGTAATCGAAGCCGTCTTTGAAATACAGTTAGTTACTCGGATCTCCTCTTCTTTACAATTTAGTAGTAGAATAAGGCAAAGGCTTCTATACCATCTGGAATGGTCGTCTCATAATCTAAGCATGTCCTT
Silene conica	3	mt	AGCTTGCCAAGGGAGCAGACTCAA[R1]	18-16	Silene_conica_mito_115	53070	A>G	CTTTACAATTTAGTAGTAGAATAAGGCAAAGGCTTCTATACCATCTGGAATGGTCGTCTCATAATCTAAGCATGTCCTTGAAGGTTCCCATTAACCCAAGGGTAGCGGGCGTATCATTTTCTCGTACTACTCA
Silene conica	3	mt	ACGATACAAAGAGCCAACCGCAAC	28-18	Silene_conica_mito_115	53070	A>G	TAATCGAAGCCGTCTTTGAAATACAGTTAGTTACTCGGATCTCCTCTTCTTTACAATTTAGTAGTAGAATAAGGCAAAGGCTTCTATACCATCTGGAATGGTCGTCTCATAATCTAAGCATGTCCTTGAAGGTTCCCATTAACCCAAGGGTA
Silene conica	3	mt	CCCTACAAATAGGACAAATGCTGA	32-27	Silene_conica_mito_115	53070	A>G	TTGAAATACAGTTAGTTACTCGGATCTCCTCTTCTTTACAATTTAGTAGTAGAATAAGGCAAAGGCTTCTATACCATCTGGAATGGTCGTCTCATAATCTAAGCATGTCCTTGAAGGTTCCCATTAACCCAAGGGTAGCGGGCGTATCATTTTCTCGTACTACTCAGTTTAGGCTGCCCATT
Silene conica	3	mt	CGTATTAACACCTATCGAGAAGAC	11-6	Silene_conica_mito_115	53070	A>G	TAGTAGTAGAATAAGGCAAAGGCTTCTATACCATCTGGAATGGTCGTCTCATAATCTAAGCATGTCCTTGAAGGTTCCCATTAACCCAAGGGTAGCGGGCGTATCATTTTCTCGTACTACTCAGTTTAGGCTGCCCATTATTACTAGAATCGTAGTGGACGATTGCATTCATAGTCTCCATCCACT
Silene conica	3	mt	CCGAAATAAACAGATGGTGGCAAT[R1]	20-15	Silene_conica_mito_115	53070	A>G	TTGCCGAAGAGCAGCAGTTTTCTGTAATCGAAGCCGTCTTTGAAATACAGTTAGTTACTCGGATCTCCTCTTCTTTACAATTTAGTAGTAGAATAAGGCAAAGGCTTCTATACCATCTGGAATGGTCGTCTCA
Silene conica	3	mt	CTCAACTGGACAGATAGGTGCCGA[R1]	19-15	Silene_conica_mito_115	53070	A>G	AGGCTTCTATACCATCTGGAATGGTCGTCTCATAATCTAAGCATGTCCTTGAAGGTTCCCATTAACCCAAGGGTAGCGGGCGTATCATTTTCTCGTACTACTCAGTTTAGGCTGCCCATTATTACTAGAATCG
Silene conica	3	mt	AAGAATTGAGATCTGTTTTTCTAT	28-10	Silene_conica_mito_115	53070	A>G	CTATACCATCTGGAATGGTCGTCTCATAATCTAAGCATGTCCTTGAAGGTTCCCATTAACCCAAGGGTAGCGGGCGTATCATTTTCTCGTACTACTCAGTTTAGGCTGCCCATTATTACTAGAATCGTAGTGGACGATTGCATTCATAGTCTCCATCCAC
Silene conica	1	cp	ACACGCTGCCACTAATCCCACCTA[R1]	22-10	Silene_conica_mito_116	27264	A>G	GGGCTGCTAATGAGCCTTGTTTTTCTTTTCTTATATAGGAAGAAGTCAGGCCCGTTCCCAGTCTTCCCCGCGTTTCTTGCGATTAGTGATCGCTCGCATACTAAAAGAGCCGCGGCATTCATCTAAGGGCTTG
Silene conica	1	cp	CACGCTACGCGCGACGCCCCCGCA	28-25	Silene_conica_mito_116	27264	A>G	CTATTATTTGGGCTGCTAATGAGCCTTGTTTTTCTTTTCTTATATAGGAAGAAGTCAGGCCCGTTCCCAGTCTTCCCCGCGTTTCTTGCGATTAGTGATCGCTCGCATACTAAAAGAGCCGCGGCATTCATCTAAGGGCTTGCCCCTTTTTACTGATACCTCACATCTACCTGCCATCTTAGCAAGGACGACCCT
Silene conica	1	cp	CCCCACAGAAGCGCCTCCCTGTCA[R1]	25-21	Silene_conica_mito_116	27264	A>G	GAAGAAGTCAGGCCCGTTCCCAGTCTTCCCCGCGTTTCTTGCGATTAGTGATCGCTCGCATACTAAAAGAGCCGCGGCATTCATCTAAGGGCTTGCCCCTTTTTACTGATACCTCACATCTACCTGCCATCTT
Silene conica	1	cp	GAAAAAACTCAGGGCGTCCCGAAT	19-13	Silene_conica_mito_116	27264	A>G	AGAAAGCCCCTCCTTTTCTCGTTCTCGCAATGTTCTAATAGAATGCCTTCTAATTTAGCATTTTGTAGGAATAGCTCTTTATTTTGCCTATTATTTGGGCTGCTAATGAGCCTTGTTTTTCTTTTCTTATATAGGAAGAAGTCAGGCCCGTTCCCAGTCTTCCCC
Silene conica	1	cp	CCTCCGCCGAAGTGTAGGAGCGAA	30-27	Silene_conica_mito_116	27264	A>G	AAAAAGTAGAAAAAGAAAGCCCCTCCTTTTCTCGTTCTCGCAATGTTCTAATAGAATGCCTTCTAATTTAGCATTTTGTAGGAATAGCTCTTTATTTTGCCTATTATTTGGGCTGCTAATGAGCCTTGTTTTTCTTTTCTTATATAGGAAGAAGTCAGGCCCGTTCCCAGTCTTCCCCGCGTTTCTTGCGATTAGTGATCGCTCGCATACTAAAAGAG
Silene conica	1	cp	GAAATTTAAACTGGAATCGTAAGA[R2]	27-14	Silene_conica_mito_116	27264	A>G	CTCTTTATTTTGCCTATTATTTGGGCTGCTAATGAGCCTTGTTTTTCTTTTCTTATATAGGAAGAAGTCAGGCCCGTTCCCAGTCTTCCCCGCGTTTCTTGCGATTAGTGATCGCTCGCATACTAAAAGAGCC
Silene conica	1	mt	AGGACGATGATCTACAAACCACGC[R1]	18-8	Silene_conica_mito_116	27264	A>G	CTCTTTATTTTGCCTATTATTTGGGCTGCTAATGAGCCTTGTTTTTCTTTTCTTATATAGGAAGAAGTCAGGCCCGTTCCCAGTCTTCCCCGCGTTTCTTGCGATTAGTGATCGCTCGCATACTAAAAGAGCC
Silene conica	1	mt	CGCCCAGTTAAAGCATTCCGACCC	18-7	Silene_conica_mito_116	27264	A>G	TGGGCTGCTAATGAGCCTTGTTTTTCTTTTCTTATATAGGAAGAAGTCAGGCCCGTTCCCAGTCTTCCCCGCGTTTCTTGCGATTAGTGATCGCTCGCATACTAAAAGAGCCGCGGCATTCATCTAAGGGCTTGCCCCTTTTTACTGATACCTCACATCTACCTGCCATCTT
Silene conica	1	mt	GATCTCGAGGGATTAAACCACCCG	18-7	Silene_conica_mito_116	27264	A>G	GGGCTGCTAATGAGCCTTGTTTTTCTTTTCTTATATAGGAAGAAGTCAGGCCCGTTCCCAGTCTTCCCCGCGTTTCTTGCGATTAGTGATCGCTCGCATACTAAAAGAGCCGCGGCATTCATCTAAGGGCTTGCCCCTTTTTACTGATACCTCACATCTACCTGCCATCTTAGCAAGGACGACCCTAGAGCGCAGCACCTAGATAGCTCGTTGATCCGGCTGAGGCTTTTTCCCTT
Silene conica	1	mt	ACCGCCCAATACTCACCTCCCAAC	22-11	Silene_conica_mito_116	27264	A>G	CCTCCTTTTCTCGTTCTCGCAATGTTCTAATAGAATGCCTTCTAATTTAGCATTTTGTAGGAATAGCTCTTTATTTTGCCTATTATTTGGGCTGCTAATGAGCCTTGTTTTTCTTTTCTTATATAGGAAGAAGTCAGGCCCGTTCCCAGTCTTCCCCGCGTTTCTTGCGATTAGTGATCGCTCGCATACTAAAAGAG
Silene conica	1	mt	ATGTAAAATCCGTAATTCTCGCCA[R2]	11-7	Silene_conica_mito_116	27264	A>G	GGGCTGCTAATGAGCCTTGTTTTTCTTTTCTTATATAGGAAGAAGTCAGGCCCGTTCCCAGTCTTCCCCGCGTTTCTTGCGATTAGTGATCGCTCGCATACTAAAAGAGCCGCGGCATTCATCTAAGGGCTTG
Silene conica	2	cp	AGCAATCGAAACGTTCAGCCCTAC[R1]	11-4	Silene_conica_mito_116	27264	A>G	TGCTAATGAGCCTTGTTTTTCTTTTCTTATATAGGAAGAAGTCAGGCCCGTTCCCAGTCTTCCCCGCGTTTCTTGCGATTAGTGATCGCTCGCATACTAAAAGAGCCGCGGCATTCATCTAAGGGCTTGCCCC
Silene conica	2	cp	ACCACTACCCAAGGCCCAAAAAAG	13-13	Silene_conica_mito_116	27264	A>G	GGGCTGCTAATGAGCCTTGTTTTTCTTTTCTTATATAGGAAGAAGTCAGGCCCGTTCCCAGTCTTCCCCGCGTTTCTTGCGATTAGTGATCGCTCGCATACTAAAAGAGCCGCGGCATTCATCTAAGGGCTTGCCCCTTTTTACTGATACCTCACATCTACCTGCCATCTTAGCAAGGACGACCCTAGAGCGCAGCACCTAGATAGCTCGTTGATCCGGCT
Silene conica	3	cp	AAATGTTGTTTTTAAATAAAAACG[R1]	14-4	Silene_conica_mito_116	27264	A>G	TATTTGGGCTGCTAATGAGCCTTGTTTTTCTTTTCTTATATAGGAAGAAGTCAGGCCCGTTCCCAGTCTTCCCCGCGTTTCTTGCGATTAGTGATCGCTCGCATACTAAAAGAGCCGCGGCATTCATCTAAGG
Silene conica	3	cp	CCGACTGGCTAGGCGACCTACTGG	11-10	Silene_conica_mito_116	27264	A>G	TGAGCCTTGTTTTTCTTTTCTTATATAGGAAGAAGTCAGGCCCGTTCCCAGTCTTCCCCGCGTTTCTTGCGATTAGTGATCGCTCGCATACTAAAAGAGCCGCGGCATTCATCTAAGGGCTTGCCCCTTTTTACTGATACCTCACATCTACCTGCCATCTTAGCAAGGACGACC
Silene conica	3	mt	ATGAGAGCAGCCGATTCCGCGATT	34-21	Silene_conica_mito_116	27264	A>G	GCAATGTTCTAATAGAATGCCTTCTAATTTAGCATTTTGTAGGAATAGCTCTTTATTTTGCCTATTATTTGGGCTGCTAATGAGCCTTGTTTTTCTTTTCTTATATAGGAAGAAGTCAGGCCCGTTCCCAGTCTTCCCCGCG
Silene conica	3	mt	AACGAATGCCATTACGATGCAGAC	23-21	Silene_conica_mito_116	27264	A>G	ATAAATAAGGGATGGGATGAATAAACCGCAAAAACGAAAAAGTAGAAAAAGAAAGCCCCTCCTTTTCTCGTTCTCGCAATGTTCTAATAGAATGCCTTCTAATTTAGCATTTTGTAGGAATAGCTCTTTATTTTGCCTATTATTTGGGCTGCTAATGAGCCTTGTTTTTCTTTTCTTATATAGGAAGAAGTCAGGCCCGTTCCCAGTCTTCCCCGCGTTTCTTGCGATTA
Silene conica	3	mt	ATTGAAATATATGATACTTCCCTA	27-8	Silene_conica_mito_116	27264	A>G	CTATTATTTGGGCTGCTAATGAGCCTTGTTTTTCTTTTCTTATATAGGAAGAAGTCAGGCCCGTTCCCAGTCTTCCCCGCGTTTCTTGCGATTAGTGATCGCTCGCATACTAAAAGAGCCGCGGCATTCATCTAAGGGCTTGCCCCTTTTTACTGATACCTCACATCTACCTGCCATCTTAGCAAGGACGACCCTA
Silene conica	3	mt	CACTAGGTCCACCTCACTCACAAA[R2]	22-18	Silene_conica_mito_116	27264	A>G	TTTCTTATATAGGAAGAAGTCAGGCCCGTTCCCAGTCTTCCCCGCGTTTCTTGCGATTAGTGATCGCTCGCATACTAAAAGAGCCGCGGCATTCATCTAAGGGCTTGCCCCTTTTTACTGATACCTCACATCT
Silene conica	3	mt	CCACTACACAAGTGGCCGCCATAG[R1]	14-12	Silene_conica_mito_116	27264	A>G	TTATTTTGCCTATTATTTGGGCTGCTAATGAGCCTTGTTTTTCTTTTCTTATATAGGAAGAAGTCAGGCCCGTTCCCAGTCTTCCCCGCGTTTCTTGCGATTAGTGATCGCTCGCATACTAAAAGAGCCG
Silene conica	1	cp	ACCGCCTACCATGACTCACAAAAA[R2]	22-19	Silene_conica_mito_116	57781	A>G	GGATCAATAGCAACAAAAGAGGAGGTCTCTCTGGGTAAGCAAGCGTAAGCCAGGCTCTCCGCGGAAGAAGCAGCTTCAGAACTTCCAGATTAAGAAGAAGACGAGGAATAGGGCGAAGCAGGTGGATGATGCG
Silene conica	2	cp	CACCGAACCGGGGCAAATTTATTA	12-9	Silene_conica_mito_117	3957	A>G	GCTGCTACATCCCGGGCCCTTACAGGATTATATGAAAATTTATAGGGACATATTCATAAATGATACGTCCAGTCGCTAATACTACTAGTTGGGTCGTCCAAGATTGCATAACCAAAGAATAATTTTAAGCCAAAACACTTTGGAGTTTTCAAACATAAAACATAAAGTGCGCAAGTAGGTAGAGT
Silene conica	1	cp	AGAGCCGAACCACCTAAAGAGACT[R2]	26-5	Silene_conica_mito_117	30147	C>A	CAAAATGTTTAAAAAGATTAAATTAGGCACAAGATTTGGTTTTTGTTTTCTTCTTTGAAGTTAGACTGCAGCCACAGTCGATTACGCTCAATATAAAGGGAAGACTCTCGAGTCGGGCCCACGCATAGGAGAG
Silene conica	2	cp	AGGAAAGCAGCAGGACATGGAAAG	12-8	Silene_conica_mito_117	30147	C>A	AGATTTGGTTTTTGTTTTCTTCTTTGAAGTTAGACTGCAGCCACAGTCGATTACGCTCAATATAAAGGGAAGACTCTCGAGTCGGGCCCACGCATAGGAGAGGAAAGTAATATAAGAAGGAAGAGCGTTAACTGAGGAAAGGAAGACAGTATAAAGATGAA
Silene conica	3	cp	GAAAAGGAGAAAGCCTACTGGACG[R1]	11-5	Silene_conica_mito_117	30147	C>A	TGGGTTGGCTCTTTTGACACAAAATGTTTAAAAAGATTAAATTAGGCACAAGATTTGGTTTTTGTTTTCTTCTTTGAAGTTAGACTGCAGCCACAGTCGATTACGCTCAATATAAAGGGAAGACTCTCGAGTC
Silene conica	2	cp	AAGCCACTGGATCCCCTGCAATGC	19-16	Silene_conica_mito_117	38228	C>G	CCCCCCATTTTTAAAGAGTTTCTAGAACTTGGGTAAGACAGGTCAATTATCTTTCGTTCACATACATAGTAAGATATAGGATGAGGGAGTTTACTGTCTTTTTCGTTATACCTTTCTCATCAGACATCCATCCAAAAGACAAAAAACCCTCCCTTTGACCAAAGGCATGCGCGCCTTGCAACCAAAACT
Silene conica	1	mt	ACCAACGAAATACATAATTAACCA[R1]	19-18	Silene_conica_mito_118	2491	A>G	TGGAACCTCGTCTTCTTCGCCTTATCCGTATTCTTCAGCTTCTTTTCTTGTTTTCTGTAGTTTAAGGCGAGCTCGGCAGGCGGATAAATCTCCTGAGGGGAAAGACCCAAGGTCGAACGTTAGCGCGAGGAAA
Silene conica	1	mt	CAAACAACAAAGGGATTCGCCATG	32-23	Silene_conica_mito_118	2491	A>G	CGAATTACTATTGATGGAACCTCGTCTTCTTCGCCTTATCCGTATTCTTCAGCTTCTTTTCTTGTTTTCTGTAGTTTAAGGCGAGCTCGGCAGGCGGATAAATCTCCTGAGGGGAAAGACCCAAGGTCGAACGTTAGCGCGAGGAAAGAAGGTGAGGGGAGGTAGAA
Silene conica	3	cp	AGACTAAATACACCAACGTATCAT[R2]	10-4	Silene_conica_mito_118	2491	A>G	TGCCTTGACCGAATTACTATTGATGGAACCTCGTCTTCTTCGCCTTATCCGTATTCTTCAGCTTCTTTTCTTGTTTTCTGTAGTTTAAGGCGAGCTCGGCAGGCGGATAAATCTCCTGAGGGGAAAGACCCAA
Silene conica	3	mt	ATGGCGCCTCCCCGTTAGTAATAC[R2]	20-7	Silene_conica_mito_118	2491	A>G	CGCTTTCCTATTCGTCTTCTTAGTAAGGCTCCCTATGCTTATGCCTTGACCGAATTACTATTGATGGAACCTCGTCTTCTTCGCCTTATCCGTATTCTTCAGCTTCTTTTCTTGTTTTCTGTAGTTTAAGGCG
Silene conica	3	mt	CACAATTCGCCATTATGATCGCGC[R2]	24-14	Silene_conica_mito_118	2491	A>G	CCTTGACCGAATTACTATTGATGGAACCTCGTCTTCTTCGCCTTATCCGTATTCTTCAGCTTCTTTTCTTGTTTTCTGTAGTTTAAGGCGAGCTCGGCAGGCGGATAAATCTCCTGAGGGGAAAGACCCAAGG
Silene conica	2	cp	CCGCGCAACCCTGTTCAACTCTAA	17-17	Silene_conica_mito_118	52064	A>G	ATTATATCTGATTGTCAGTCGATCCCACCTCGACTTTAAACTGAAGAAGAAGCATAAGCTGAATACGAGTAAATTGAGTTCCCTTAGGAAGGGAGGTCAAAGACGAAGGACCAACAAAAGAAGAATAGGAATAAGCTGGGCTTCCCTCGGAAGAAGCAAAAGAAGGGGGTCTTTACCAGAGGATGAGTTACCTTCGGTCA
Silene conica	1	mt	AGTAAGCCATATCGATAGGCTCTT[R2]	22-18	Silene_conica_mito_119	17536	A>C	AATCAACGAGAAAAAGAAGGTTCTTGGAATTGCTTTCTTTATCTTACTTTTTGCCTCTTCCATTTCTAGTTCCCTATCTTATGGTTTTCAAAGAAAAGAGCCACCTTTGCCAGTTGCGCCAACTTCTACCTTT
Silene conica	1	cp	TGTTTTCTAAAATTGGCTGTCGAT[R2]	25-5	Silene_conica_mito_119	29698	A>G	CTCGCTTCTTCCAGCCCCGTTACATTTAGTATCCCCCTACGTTCGAGAGCCCTTTTTTCTCCTCCCCGGTTGGTCGAGTCGTCTTATATCTCCACTTGTCAGTCGAGCTCTCCCCTCCTATACTCTTGCTTGT
Silene conica	2	cp	AATCGGTTATAGATCCTGCGACGA	9-4	Silene_conica_mito_12	8533	C>G	CTAATTCTCACCCTAACCCACGAAGATGCTCACTTCGTCTTTGTGTTTTCTACTTAGTAAGCGCAATTCTCCATTTCCACGGACAGTGCTTCCGTTTGCGAGGAAGGAATCCCCTTTATGAATTCCATTCGTCTATAAGAATTCTGGGCTTTTCTTTATTACAGCCCTACCTAGCTTTTCTCTCGTAATGGGCCAGATTAAACA
Silene conica	3	cp	AGGCTTCTTCTAGGTAAAACTTCA	11-9	Silene_conica_mito_12	42667	A>G	CATTTTTCCGTTGAAAGAGCACGTCCCAAAGAAGAAAAGCACTAGGCAAGTGCACTAAAGAAAAAGGGAAGGAAAAGCAGGTAGAACGCGCTTTCTTTTTGCGTGCTGCACTGACGCGGTACTTCTGGTCAGAGACTTGAGTAAGGAAAGATTTTGACGTTCATCGGGTGGAAAGTGAAA
Silene conica	3	cp	TAGCACCTTCATTTAACAACTCAA[R2]	11-6	Silene_conica_mito_12	43683	A>G	GAAAAGCAAAGTGTACAACCCTCACATACTAAAAGGCAAAGCAAGCAAGGAGAAGAAAAGCACTATAGAAGGCTTTCGTGTTGGTTCAATTCTCGAACGAAAGTCAAGCTTTGTAAAGAGGGCGGCACCAAAG
Silene conica	2	cp	CAATTTCAGTCGGCATAGGGAGGC	20-8	Silene_conica_mito_12	63068	A>G	ACCAAGAAAAGAGGCTCGACTGACAAAGAGAGGGACCAAGAAAAGAAAATGGGATCCTCCCCAAAGAGGTAACGAGGTCGAACGTTAGTGAGGCAGGGCGAAGACTGTAAAGGATCGGGTGAAAGAGCGACTGAAGAATGAAGGAGAAAGACTCAGCTGTTAAGTTGAGGAGATAGCCCGAACCGGGGGATTGACTGAGGAACGAAGGAGAGGAGAGAGAAATGCGACTAGA
Silene conica	3	mt	AGATGCTGGACCCTCGCGAGGGTG[R2]	22-10	Silene_conica_mito_12	110696	A>G	CTCCTCTCGTATGCACTAGATCCTATTTCCTTTGGTAGAGGCGTTCCCCGCTTCCTCTGGTCGAGTCATTGTTATACCTCGGCCTCATGCTTCAACCGAGCCTCTTTCCTTAGCAGCCGTCCACCCTTCGTCT
Silene conica	1	mt	GTCCAGGATGGGTGATTACCAAAC	24-12	Silene_conica_mito_12	118708	A>T	AAGCACGCCCTTCTTTCTTGAGGACGTTACAGAGGTTACAAATCCCCGGCGAATATAGGCAAAAGGTACTGCTGAGACGAAATCTCCATCTAGTCAGTAGTATCTAGGTTAGAAGCTCCACAAGCAGGACAGAACCAGGAAACTTTTGGATAGACATGTAAAGTAAAGATCACACCAAGCGAAAGAAAGGAAAAGGGCC
Silene conica	1	mt	AAAAGAATTACTGTAGGCCCGCTT	18-11	Silene_conica_mito_120	16108	A>G	CGAGTCTCTTTTAAATCTCCTCCACCTCGTACCTCTCGCTAACACTCGACCTCGTTTATCTTTCCTCAGTATTCGCCTCCGCTCCTTGGCAGTCTCCCCCACGTTCGTGCTTGCTATCTCCTTAGCAGTCTCGTTTCTCTCTCCTCGCCATCATT
Silene conica	2	cp	ACCCATTCCCTCCCCCAATCCATT[R2]	10-7	Silene_conica_mito_120	16108	A>G	ACCTCGTACCTCTCGCTAACACTCGACCTCGTTTATCTTTCCTCAGTATTCGCCTCCGCTCCTTGGCAGTCTCCCCCACGTTCGTGCTTGCTATCTCCTTAGCAGTCTCGTTTCTCTCTCCTCGCCATCATTC
Silene conica	2	cp	AAAAAACAAACGCTTCGGCCGCCC[R1]	18-8	Silene_conica_mito_120	16108	A>G	CGTACCTCTCGCTAACACTCGACCTCGTTTATCTTTCCTCAGTATTCGCCTCCGCTCCTTGGCAGTCTCCCCCACGTTCGTGCTTGCTATCTCCTTAGCAGTCTCGTTTCTCTCTCCTCGCCATCATTCTTCA
Silene conica	3	cp	AGTACAGACGAGCGACTTTACCAT[R2]	10-5	Silene_conica_mito_120	16108	A>G	CGAGTCTCTTTTAAATCTCCTCCACCTCGTACCTCTCGCTAACACTCGACCTCGTTTATCTTTCCTCAGTATTCGCCTCCGCTCCTTGGCAGTCTCCCCCACGTTCGTGCTTGCTATCTCCTTAGCAGTCTCG
Silene conica	3	cp	CTCGATTTAGCGTCGGCTTGTTCC[R2]	10-7	Silene_conica_mito_120	16108	A>G	CTCGTACCTCTCGCTAACACTCGACCTCGTTTATCTTTCCTCAGTATTCGCCTCCGCTCCTTGGCAGTCTCCCCCACGTTCGTGCTTGCTATCTCCTTAGCAGTCTCGTTTCTCTCTCCTCGCCATCATTCTT
Silene conica	3	mt	ACACTCCAGGTGTCGCTAAATGTG[R2]	27-10	Silene_conica_mito_120	16108	A>G	GTACCTCTCGCTAACACTCGACCTCGTTTATCTTTCCTCAGTATTCGCCTCCGCTCCTTGGCAGTCTCCCCCACGTTCGTGCTTGCTATCTCCTTAGCAGTCTCGTTTCTCTCTCCTCGCCATCATTCTTCAG
Silene conica	3	mt	GACATTCCGCAGGCCTAGAGCGCG[R1]	24-15	Silene_conica_mito_120	16108	A>G	CGTTTATCTTTCCTCAGTATTCGCCTCCGCTCCTTGGCAGTCTCCCCCACGTTCGTGCTTGCTATCTCCTTAGCAGTCTCGTTTCTCTCTCCTCGCCATCATTCTTCAGACGAGCTATTTATTAAAACCTTAG
Silene conica	3	mt	CACAGCCTTATCTAGGCAATGTCC[R1]	15-12	Silene_conica_mito_120	16108	A>G	CCTCGTTTATCTTTCCTCAGTATTCGCCTCCGCTCCTTGGCAGTCTCCCCCACGTTCGTGCTTGCTATCTCCTTAGCAGTCTCGTTTCTCTCTCCTCGCCATCATTCTTCAGACGAGCTATTTATTAAAACCT
Silene conica	2	cp	TAAATGACCGAATCCTAGCCTATA	14-10	Silene_conica_mito_120	22407	A>G	TAAGAGCTTTCTAATCATCCTACCTACCTTACTAGAAGAAGGTTTGGCTCTTTAATTCGAACTCGACTTCCTAGAATCCCACCCGCCTGTCGGCTCTCGTGGGAGTGTCTGCGGCGGTACAACTGGTCTTGGATTTGCAAGTTCGTTAGGGAGACTCTACCTGGTAAGAGGACC
Silene conica	3	mt	GTTTAGAACCAATAGACCCGAGTC[R2]	18-18	Silene_conica_mito_120	22449	A>G	GGATTTGCAAGTTCGTTAGAGAGACTCTACCTGGTAAGAGGACCCGGAGGCGAAAGGGCGGGCGGTAGTGAGACGGGGAGAAGACCATAGGAGAAGGAGGCTCACCTTTTCCTTAAAGGGGAGGATAGGGGCT
Silene conica	2	cp	CAGATACCACGAGTGCCAGAGCCG[R1]	23-11	Silene_conica_mito_120	25318	A>G	GGGCGAACCTTATGAATTCTGAAAGAGAGAGGCCCTCCTGTTAATCATTCGATCTCATACCTCGCATTACGGCTACCTTTAGGGTGTATATCTGTTCAAGAGAAAGTCAATGAACTAGGCCTTTCTCAGTATT
Silene conica	1	cp	CCCGGGCCTGAACGGTCGTAGGAT[R1]	31-15	Silene_conica_mito_121	7830	C>G	GAAGTCTCTCCGAGCCTCAATTATATCTCCTCCCGTATTCACTCGAGCCCACTTCCCACTATATCCTTGGCAGTCGCCCTTTCGCCTCCGGTAAACCGCCTAAGGTCGAGCCTTTTCTCCTTATCCTCGTCTT
Silene conica	1	cp	ACCGGCGTTTAAGCTAATACCAAA	22-11	Silene_conica_mito_121	30561	A>C	TAAGTGCAAATTAAACATACTTATTATGGTTATCTCCCCCAATCCCCATGGAACCACGCCCGACGAGCTATACACGGCCGGGCCTCCAGTTACCACTCACATCTAGTTACCTGTCTCTCTCGTTCGCTCCCACTACTCTCTTTGAAATCTATCTCCTCGCCCTCTCCTCGCCTTCATACTTCA
Silene conica	1	cp	GCGGGCCCAAGATCCTCGCGCAGA[R2]	18-15	Silene_conica_mito_121	30561	A>C	CCTCCAGTTACCACTCACATCTAGTTACCTGTCTCTCTCGTTCGCTCCCACTACTCTCTTTGAAATCTATCTCCTCGCCCTCTCCTCGCCTTCATACTTCAGTTGAGCCCCATTTCTGGGCGTATGCACTCGA
Silene conica	1	mt	CTGCAATTTTGCGGATATAAACGC	25-18	Silene_conica_mito_121	30561	A>C	CCCCCAATCCCCATGGAACCACGCCCGACGAGCTATACACGGCCGGGCCTCCAGTTACCACTCACATCTAGTTACCTGTCTCTCTCGTTCGCTCCCACTACTCTCTTTGAAATCTATCTCCTCGCCCTCTCCTCG
Silene conica	2	cp	AGCCTCCAGTAAGACCAATACAAT	11-6	Silene_conica_mito_121	30561	A>C	CCCCATGGAACCACGCCCGACGAGCTATACACGGCCGGGCCTCCAGTTACCACTCACATCTAGTTACCTGTCTCTCTCGTTCGCTCCCACTACTCTCTTTGAAATCTATCTCCTCGCCCTCTCCTCGCCTTCATACTTCAGTTGAGCCCCATTTCTGGGCGTATGCACTCGAGCCTATTTCCTCCGGTCGAGCCTATTCTCCTCTCCTT
Silene conica	3	mt	AACTAACTCCACACAGAAACGTGT[R1]	23-18	Silene_conica_mito_121	30561	A>C	CGGGCCTCCAGTTACCACTCACATCTAGTTACCTGTCTCTCTCGTTCGCTCCCACTACTCTCTTTGAAATCTATCTCCTCGCCCTCTCCTCGCCTTCATACTTCAGTTGAGCCCCATTTCTGGGCGTATGCAC
Silene conica	3	mt	AATGTAAGCTGTATTAGTTGACCC[R1]	17-12	Silene_conica_mito_122	5824	A>G	CATCAGCAGAGGCATGTTATACCTTCGATGCCTTCACATGCTATAGTACAGTACGCGCGTGAGGGCGAAGATGGCTATAGTATATATATAAACAAGAGGGGGAGCAGACTCGGGGGGAAGACTGGGAGAAGAG
Silene conica	3	mt	AGATCCCGAAAAGAAGTAAATCGT	20-6	Silene_conica_mito_122	5824	A>G	AGTACGCGCGTGAGGGCGAAGATGGCTATAGTATATATATAAACAAGAGGGGGAGCAGACTCGGGGGGAAGACTGGGAGAAGAGGGCATTCCAGTAGAGTCCTTTTTCTCCTCTCGTACCTGCCTGGGGCAAACAAAGGTAA
Silene conica	3	mt	ATTCCCGTCACTGTTGAAAACGAT	20-14	Silene_conica_mito_122	5824	A>G	GTACGCGCGTGAGGGCGAAGATGGCTATAGTATATATATAAACAAGAGGGGGAGCAGACTCGGGGGGAAGACTGGGAGAAGAGGGCATTCCAGTAGAGTCCTTTTTCTCCTCTCGTACCTGCCTGGGGCAAACAAAGGTAAAAAGACTCCCTTAATTAGGAGTGGAACGGAAGTTAAGATAATGAGGATTGACACCTGCGCTCACCTTACTTAAAG
Silene conica	3	mt	GAACAAGAATCGTTGGACCTAGAT	21-20	Silene_conica_mito_122	5824	A>G	AGGCATGTTATACCTTCGATGCCTTCACATGCTATAGTACAGTACGCGCGTGAGGGCGAAGATGGCTATAGTATATATATAAACAAGAGGGGGAGCAGACTCGGGGGGAAGACTGGGAGAAGAGGGCATTCCAGTAGAGTCCTTTTTCTCCTCTCGTACCTGCCTG
Silene conica	2	cp	CGTTCCCAATGTGCAGCCAGGGCT[R2]	17-11	Silene_conica_mito_122	15475	A>T	TGCTTTCGCATCTTTCTTTAGATATTCTCGCCCTATCGCCCAGCCAATCCAAAGGGTCGTCGATCTTGTCTTGCCAGCGCTCACCACAACTTCGAACCAGCGCCATGCTCCTCGTACTCATCCCAGACTGCCT
Silene conica	2	cp	GCTCCACAGCCTTACGAAGATCCC[R1]	29-15	Silene_conica_mito_122	21549	A>G	CTAATGCATGGATAAAAGAAAGAGAAGGGCGTACATTCTGCCCGAAGGGCTTCCGGTGCCTTGAAAAAGAAAGCGAAGAATTAGGTCTTCAAGGGAGAGAGTCGAAGAAGCCTACGTTGAGGGTAGCTCGTCT
Silene conica	2	cp	AAGCAGAGTGCCCTTTAAGCATTG[R2]	14-11	Silene_conica_mito_122	37853	A>G	GTTTTAAATATGAATGAAGGCTTGTTGTTGAATGACGACTCCCAAATGCTAATAGTATAGAAAGAGGACCCCCTTGGTCCGACTACAAGTCTTTAAGGATCATACGCAGCGCTTGCATTTCTGAAAATGAGAA
Silene conica	1	mt	AACCGAAGTACAGGCCGGTCCCTG	11-7	Silene_conica_mito_123	3831	A>G	CTGCTCGGATAGCAGCCAAACACAGGGGCGGATACATCCACAAAACAAAGGAATAGCGCAGGCCCAGCTTAGTCCCCCCCCTTGTCAGTCGAGTCAGTAAACTCCCAGCTCTTTTCACTTATCAGTAGCTGCTACGTCGTAGGTTTGGAGAGAAGTTGAAACCGCCGGCCTGTTATACTTGTTTAAGCCCAAACTTCCCACCTGCTCGGTTGA
Silene conica	3	cp	TCGCCTCTAATTTTAGATCGTAAC	14-11	Silene_conica_mito_123	3831	A>G	AAAGGAATAGCGCAGGCCCAGCTTAGTCCCCCCCCTTGTCAGTCGAGTCAGTAAACTCCCAGCTCTTTTCACTTATCAGTAGCTGCTACGTCGTAGGTTTGGAGAGAAGTTGAAACCGCCGGCCTGTTATACTTGTTTAAGCCCAAACTTCCCACCTGCTCGGTTGAAAAAATACTAACG
Silene conica	3	mt	GACTATCCCAACGCAAACAAAAAT[R2]	18-9	Silene_conica_mito_123	3831	A>G	TCCCCGGCTTATATAGTAACTGCTCGGATAGCAGCCAAACACAGGGGCGGATACATCCACAAAACAAAGGAATAGCGCAGGCCCAGCTTAGTCCCCCCCCTTGTCAGTCGAGTCAGTAAACTCCCAGCTCTTT
Silene conica	3	mt	AAATAGACATCCCAGAAGTTAAAG	27-11	Silene_conica_mito_123	25308	A>C	CAAGAGGAAAAAGAAAGGAAAGGACTCCTCTCATCAGCAAAAAGGGGAGCTTCTCTCCTTGGCAGTGGAGCTCCTTCCAGGCTCTCTCCTTTATCTTCTTCTTTCATGGAACTCCTCCCATCGACCTGCCTTCGGCTTCTCTCCTCTCACTATTGATCTTCACCCCGCTCGCTAGGCTCGAGGCATTTCT
Silene conica	3	cp	ATAGACTCAACTGCGAAAACAAAG	16-13	Silene_conica_mito_123	49020	A>G	CTATTTAAGGGCAAGCCCCCGAGCAGACTAAGAGGACAGACGCATAGAAGGGGTTTTCCCATTCCATAAGGTTTCATCACACGAGATCCTCTTCTTTCTTTATAGATCGGGTATAGAATGTAGCATGCGTCTTTGCCGCCTCCCTGCTGATGGAAAAGCTGGCCACTTGAGCCAGCAATTGAATA
Silene conica	1	mt	GCTGAAGATTTGTAGACATATTAA	15-8	Silene_conica_mito_124	839	C>A	CGGATTGTAGTTCTTTGCCCTCTTACTTTAGCCTCTATTTTGCCGAGTTTATGGTTTGATGGAATTACTTTCTTTTTCGTGCTTTTGCCTATTCTATTTTAAGTTCTATGTCCTTACGTGTGTCAAAGAAAAGAGCCTCCTTTACACCTTTGCCAGCTCATGAAACTTCAGATTGGAATTCTTTCTAGACTTTTTCTTCTTTATATAGTATGTTTG
Silene conica	3	mt	AATCCGACCCCCATGGGTGCTGCC	5-4	Silene_conica_mito_124	1268	A>G	AGAATTTAAGCGAAAAAGACTATCTTTTAACTGCACTATATAGATTAGCTCCCCTCACCCCACTCCATCGTACCGAAGTCCTCCCCCCTCGTCTTCGTGCCTCAGCCCCCCCCCTAAAGGGCCACAAGTGGGCC
Silene conica	3	mt	GAATGTTCAGTTGTGTGATGGTCT[R2]	24-21	Silene_conica_mito_124	46387	A>G	AAGCGAGGAACGACTAGAGGGAGGTATAGTTATAGAGGTGGGGGAGAGTGAAACTAGGTCGAGTGCCAAGTTGAGGGGGACTTGTCCCTGTTAGTTAGTAGTCGGTCTTCCGTGGAAAGACTCAATCTTGCGT
Silene conica	1	mt	ACAGAGCCTGAACGAGGTACCAGG	17-14	Silene_conica_mito_125	13610	C>A	AAATTCTACTGCCCCGATATGACTAAAGTCCACTCTCTAATGAGAGCCGACAGGCGGGTGGGATTCTTAGGATTAGCAGTTCGAAGTAAAGACCCAAAACTGACTTGAAAACAGGCTCTTGGAGCGGAGTCGAATTCATCAAATT
Silene conica	1	cp	AACAGCTTTGATGCTGACTAAAAA[R1]	34-12	Silene_conica_mito_125	32049	A>G	GACGGACTGTCCCATCTAGCACCCATCCCTTGCCTTTCTTGTCCCGTTTTCCCGGGCTGGAAGATTCGTTACAAACTAAGAGAACCTTGCCTCTTTGAAAACCAATTCTTCCCAAAATCCCCAGGAAAGACAC
Silene conica	1	mt	ACCTAGGGACATTGGCACCGCATA[R2]	20-8	Silene_conica_mito_125	32049	A>G	CACCCCGGGCTTACCACCCAGACGGACTGTCCCATCTAGCACCCATCCCTTGCCTTTCTTGTCCCGTTTTCCCGGGCTGGAAGATTCGTTACAAACTAAGAGAACCTTGCCTCTTTGAAAACCAATTCTTCCC
Silene conica	2	cp	GAACCGAAAAAATTAAATTAATCT[R2]	11-9	Silene_conica_mito_125	32049	A>G	TAGACCCACCCCGGGCTTACCACCCAGACGGACTGTCCCATCTAGCACCCATCCCTTGCCTTTCTTGTCCCGTTTTCCCGGGCTGGAAGATTCGTTACAAACTAAGAGAACCTTGCCTCTTTGAAAACCAATT
Silene conica	3	mt	GCCACATATACAGGTTTGCAGTAG	21-17	Silene_conica_mito_126	33237	A>G	TATAAGGGAACTCTCCCTGTTGGGCCACGAATGCGCGCCTACCCATAGTAGACACTACAATCTTTTCATGTGTGAGCTCTCTGATATACCCTGAAGCAGCTAGTATATCAGATTCTTCTACGGATTTTAGGAATAATGGAGTAAAATGACGGGCGAGATAACTCCTTGGCCTGTGTAGTGGGTCTTGGAAAGCTTTCTCTGCTAAAGCAGCTTGTGGGGCTT
Silene conica	1	cp	AAAAAAATAGGACAGGCTCACACT	28-15	Silene_conica_mito_126	39299	A>G	AAAGAAGTCACTAATAGGGATTGGTGGGGTACTTCGCTCTACTGCTGAATAAACCCCTAAAGAAAAGAAGGGCATTAAGTGGTAGATTTCGAGGCGGCTTTCGATCTCTTATCGTACCAAGCCAAAAATGCTGCTAATTAAATAGAGTATATAAAAGAAAGCAAAGCCCCTTTAAGAATAAAGCGTAAAGTGAGAGACTTATATTAACGCTTGCT
Silene conica	1	mt	AGAAAGCGTGGGGAAACGGACGCG	11-8	Silene_conica_mito_126	39299	A>G	CTCTTTCAAGGGTAGGCGCGGCTGTTTCTGGCTTATAGTACAGACTACTTTCCTTTGACTTCTCGCTTAACTAAGACATCCACATGAGCATAGGTAAAGAAGTCACTAATAGGGATTGGTGGGGTACTTCGCTCTACTGCTGAATAAACCCCTAAAGAAAAGAAGG
Silene conica	3	cp	GCATCCGTCGTGTTTCCGCGATCT	9-7	Silene_conica_mito_126	39299	A>G	ATGAGCATAGGTAAAGAAGTCACTAATAGGGATTGGTGGGGTACTTCGCTCTACTGCTGAATAAACCCCTAAAGAAAAGAAGGGCATTAAGTGGTAGATTTCGAGGCGGCTTTCGATCTCTTATCGTACCAAGCCAAAAATGCTGCTAATTAAATAGAGTATATAAAAGAAAGCAA
Silene conica	3	mt	CAGCTTATGGGCTGCTACAAAAAA[R1]	22-19	Silene_conica_mito_126	39299	A>G	TGGGGTACTTCGCTCTACTGCTGAATAAACCCCTAAAGAAAAGAAGGGCATTAAGTGGTAGATTTCGAGGCGGCTTTCGATCTCTTATCGTACCAAGCCAAAAATGCTGCTAATTAAATAGAGTATATAAAAG
Silene conica	3	mt	CAAGACGTTATCTACTCCAACCCT[R1]	26-13	Silene_conica_mito_126	39299	A>G	TTCTCGCTTAACTAAGACATCCACATGAGCATAGGTAAAGAAGTCACTAATAGGGATTGGTGGGGTACTTCGCTCTACTGCTGAATAAACCCCTAAAGAAAAGAAGGGCATTAAGTGGTAGATTTCGAGGCGG
Silene conica	3	mt	GATGTTATCCCCTCGCAAGCACTT[R1]	21-14	Silene_conica_mito_126	39299	A>G	GAAGTCACTAATAGGGATTGGTGGGGTACTTCGCTCTACTGCTGAATAAACCCCTAAAGAAAAGAAGGGCATTAAGTGGTAGATTTCGAGGCGGCTTTCGATCTCTTATCGTACCAAGCCAAAAATGCTGCTA
Silene conica	2	cp	CGCGTTAATGCTTTCCGACGGCCC	8-8	Silene_conica_mito_127	22033	C>G	AGTCCCAGAGGCGGAAATTTCTGCAATTGAAGCTTGTTCTGATGATGTAAAGTGCAGTCCTTCTACTATAAATTATTTTTAGATTGTAGGAAGCGACTTGATTCCTCCTTCGGCTGGTCAGTCAAGAGGAAAGGGCA
Silene conica	3	mt	ATTTGGGAGACTTGCTTTGAGGGC	28-13	Silene_conica_mito_128	27422	A>T	CTTAAGAGTCGGAGAGGACTTTGCAACACAAGTCCAGTGCTTCGGTTTGTATTTTGCGTTCTTGGTATCCACCCCAATAATTCAAGTTCAATCAGAAATGGTGGATCTTTCTTTCTTTTATAGGGCGGCACGTCTCTCTTTTTATTTAAATCGTTTAACTTCATCTTGTCGAAATGTCTTGTATGTGCGGCGGCGATAAACCTCCTT
Silene conica	3	mt	CTCCTACCACAGGAAGCGGATCAA[R2]	30-11	Silene_conica_mito_128	33370	A>G	CCTTCTGATGGAGAGGAAGATTGGCTCGTAAAATAAAAAAGGTTCACAAACAAGGTTGAGAAAAGTGCCTTAAAAACTTAGAAGGGGTTTCTGTTCCTGGACCCTGCTGTAAGGTTTGCAATCCTTAGTCTAG
Silene conica	1	cp	CCACATCAATTGTTGGGTTATGAA[R1]	25-17	Silene_conica_mito_13	45854	A>G	CTAGAGTAACTTTCGCTGCTTCGAATCCTTAAGCGCAGGTAGAGCCCACCTCAGCACCCACATTACGTGCAAGTGAAACCCGCCCCTTTCTTAGTAAGTCCGCCCCCCTAGGGGCAGGCAATCCCTCTGACGC
Silene conica	1	mt	AGCCCTTACCATGCCTCAAAGTGA[R2]	15-10	Silene_conica_mito_13	45854	A>G	AGCCCACCTCAGCACCCACATTACGTGCAAGTGAAACCCGCCCCTTTCTTAGTAAGTCCGCCCCCCTAGGGGCAGGCAATCCCTCTGACGCTTCTGTTTCAGTTCAGATGGGAAATCCCCCCTTCATGTCAAC
Silene conica	1	mt	AATTGGCATTCCCTAATGGAGATC	15-10	Silene_conica_mito_13	45854	A>G	CTTTCTTAGTAAGTCCGCCCCCCTAGGGGCAGGCAATCCCTCTGACGCTTCTGTTTCAGTTCAGATGGGAAATCCCCCCTTCATGTCAACACTCATTATAGAGACCTTTAACTTTATTAAAGTCAGTTTAGGCACTTCCTCCGTTTCGTGGGTACTTCTTCAAAAAGGAAGGATCCGTCGAAACAACTCCTTCAACG
Silene conica	1	mt	ATACTATCTAGCCCCAGCTATTTC	24-20	Silene_conica_mito_13	45854	A>G	ACTTACTTTTCTATAAATGGAGGATAACAACTTTACTCACTTCACTTCTAGAGTAACTTTCGCTGCTTCGAATCCTTAAGCGCAGGTAGAGCCCACCTCAGCACCCACATTACGTGCAAGTGAAACCCGCCCCTTTCTTAGTAAGTCCGCCCCCCTAGGGGCAGGCAATCCCTCTGACGCTTCTGTTTCAGTTCAGATG
Silene conica	2	cp	CGAAATCAATACTTATTAAAATAA[R1]	15-10	Silene_conica_mito_13	45854	A>G	TAACTTTCGCTGCTTCGAATCCTTAAGCGCAGGTAGAGCCCACCTCAGCACCCACATTACGTGCAAGTGAAACCCGCCCCTTTCTTAGTAAGTCCGCCCCCCTAGGGGCAGGCAATCCCTCTGACGCTTCTGT
Silene conica	3	cp	GTGGGTAGGGCTTCACCTTAAACA	17-10	Silene_conica_mito_13	45854	A>G	GCTTGTGATTTTGGGTGGCAAGCTATACTTACTTTTCTATAAATGGAGGATAACAACTTTACTCACTTCACTTCTAGAGTAACTTTCGCTGCTTCGAATCCTTAAGCGCAGGTAGAGCCCACCTCAGCACCCACATTACGTGCAAGTGAAACCCGCCCCTTTCTTAGTAAGTCCGCCCCCCTAGGGGCAGGCA
Silene conica	3	mt	GTTACAACATTGTCGACATGAATG	26-22	Silene_conica_mito_13	45854	A>G	AATGGAGGATAACAACTTTACTCACTTCACTTCTAGAGTAACTTTCGCTGCTTCGAATCCTTAAGCGCAGGTAGAGCCCACCTCAGCACCCACATTACGTGCAAGTGAAACCCGCCCCTTTCTTAGTAAGTCCGCCCCCCTAGGGGCAGGCAATCCCTCTGACGCTTCTGTTTCAGTTCAGATGGGAAATCCCCCCTTCATGTCAACACTCATTATAGAGACCTT
Silene conica	3	mt	AAGATGGTAAAAAATTTTAGATCA[R1]	17-13	Silene_conica_mito_13	45854	A>G	GAATCCTTAAGCGCAGGTAGAGCCCACCTCAGCACCCACATTACGTGCAAGTGAAACCCGCCCCTTTCTTAGTAAGTCCGCCCCCCTAGGGGCAGGCAATCCCTCTGACGCTTCTGTTTCAGTTC
Silene conica	3	mt	AATCAGCAAGTTCCAACGTTGCTG	28-19	Silene_conica_mito_13	45854	A>G	CAGGTAGAGCCCACCTCAGCACCCACATTACGTGCAAGTGAAACCCGCCCCTTTCTTAGTAAGTCCGCCCCCCTAGGGGCAGGCAATCCCTCTGACGCTTCTGTTTCAGTTCAGATGGGAAATCCCCCCTTCATGTCAAC
Silene conica	1	mt	AGTAGTGGTCATTCAGGACAATGT[R1]	12-12	Silene_conica_mito_13	47722	C>T	AGAAGCAAAATACGACTCCCCGGGAAAGAAGGGAAGAAACCCCGTCAGAATGGAACGAACGCCTTGCCCGAGGGGATTCCATCTTATGCTCCCGAAGGAAACTTGACTTCTTAGTCGTATTCTACTTCGTATT
Silene conica	3	mt	CTAGAATCCTAGTCGCAGGTCTCA	14-6	Silene_conica_mito_13	65815	A>T	TATGGGAGCACGTCTTGTTATTTAAGAGACGCAAAAAGACTTCTTTTTCTATATTTAAGAACTAGAACTAGTAAAGTGACTCTACGGGATTGAACTAGATCCCTCTACTATAATGTACTCCCGGCTGGAACTTTAACCTTCACCTGTGGTTGCTTTCTTTCGGAAAGTCCCTT
Silene conica	1	mt	TAAACGCCTCCCTAATCCTCCCTA[R2]	21-17	Silene_conica_mito_13	110041	A>G	GGATGCTCCAATTAGTCTTCACCCTGCTCTTCTCTCTTCAACCGGGGTTCTCTCTTTCCTCTCGTATCAACGAGAGTCTCTCTTTTCTACCAGTCTTGTCCCTGTCTCCTCATCACTTACGTTCTTCACCCTT
Silene conica	2	cp	AATAGTTCTCACCTTAAACCCAGT	12-4	Silene_conica_mito_13	112669	A>G	AGGAGAGGAAAGAAGGTGAGGAGAGATAAGCCCAGAGAAAGCGGGGCTGAGGAACGAAGGATGAAAAAGACGGAAGAATTGGAGTTTAAGGTTCCTTTGTTTTGGTTTAGCATCGCGCACCCTCTCCTTAAGCAGTCGAGCCTTCTTAATTCCTTTACATTCTTGGTGCAATCCTCTTTTCTTTCTTTAGAAATCCTTTCTTTTTAGTCTCACCTC
Silene conica	3	mt	TAGACAGAAAGATTCCCGAGACTA[R1]	22-12	Silene_conica_mito_13	112669	A>G	AGACTTTATAAAGGCTGTAAAGGAGAGGAAAGAAGGTGAGGAGAGATAAGCCCAGAGAAAGCGGGGCTGAGGAACGAAGGATGAAAAAGACGGAAGAATTGGAGTTTAAGGTTCCTTTGTTTTGGTTTAGCAT
Silene conica	3	mt	GCCAAACGTGAATTAAGGCTGATG	27-13	Silene_conica_mito_14	97877	A>C	CCCTATGTATAAGTTTAAGACAAGACTAACTAAGTAGTATTCGATTCCACCTAACCTTTTTTAACTACTTAAGCGAAAGATTTATTAACTTAAGAAAGGCGAGTAGGTGCATCAAGAGCAAGGGCGTCGCGCTTTAAGTATAAGTAGTGGGTAGCGTGGAGGTTACAGGCCTGTAGGAAAAGCTCCGCTGTAAAAGGAGAGAATGGATGAGGTAAGAGATTTATCG
Silene conica	1	cp	AAAGATAATTGCAGACTCCACAGG	24-24	Silene_conica_mito_14	118262	A>G	TAGGGCGGCTGGCTAGATATAAAGAATTCCCCCGCTATTCTAGTCCTTATTCTTATAAAGAAAGAAGTCTTTAGAAGTCGAATAAAGAGGATTGATTATCTTGGACTAAGCTACATAAGAGCTGACTCCCCCTCTTATGCCAATTCACTTGCGGATAAGTAAACTTAGATCCTATAATGCTCTAATGCGCCT
Silene conica	1	cp	AAGAGTAGCAATGAGAGCGTGACA	16-9	Silene_conica_mito_14	118262	A>G	AAAAGCAAGATTGACATTAGCATTAGGGCGGCTGGCTAGATATAAAGAATTCCCCCGCTATTCTAGTCCTTATTCTTATAAAGAAAGAAGTCTTTAGAAGTCGAATAAAGAGGATTGATTATCTTGGACTAA
Silene conica	1	cp	ATATCTAGCCCATCCATTCGCGAT[R1]	24-4	Silene_conica_mito_14	118262	A>G	TTCGTTCGGGTACAGAAGAAAGATGAGATTCAACGGATAGAGCATCTTCTAATACAGGCAAAAGCAAGATTGACATTAGCATTAGGGCGGCTGGCTAGATATAAAGAATTCCCCCGCTATTCTAGTCCTTATT
Silene conica	1	mt	AAAGCAATCACTTACCTCAACCAG[R1]	19-13	Silene_conica_mito_14	118262	A>G	CAAGATTGACATTAGCATTAGGGCGGCTGGCTAGATATAAAGAATTCCCCCGCTATTCTAGTCCTTATTCTTATAAAGAAAGAAGTCTTTAGAAGTCGAATAAAGAGGATTGATTATCTTGGACTAAGCTACA
Silene conica	1	mt	AGGCCCAAGGAACGAGATAGATGC[R2]	17-16	Silene_conica_mito_14	118262	A>G	GGATAGAGCATCTTCTAATACAGGCAAAAGCAAGATTGACATTAGCATTAGGGCGGCTGGCTAGATATAAAGAATTCCCCCGCTATTCTAGTCCTTATTCTTATAAAGAAAGAAGTCTTTAGAAGTCGAATAA
Silene conica	1	mt	CCCTGAAGTACCGATAAGTATTTA	16-8	Silene_conica_mito_14	118262	A>G	CTTCGTTCGGGTACAGAAGAAAGATGAGATTCAACGGATAGAGCATCTTCTAATACAGGCAAAAGCAAGATTGACATTAGCATTAGGGCGGCTGGCTAGATATAAAGAATTCCCCCGCTATTCTAGTCCTTATTCTTATAAAGAAAGAAGTCTTTAGAAGTCGAATAAAGAGGAT
Silene conica	1	mt	GACAAAATTAAATAACACATCTAT[R2]	7-6	Silene_conica_mito_14	118262	A>G	AGATTCAACGGATAGAGCATCTTCTAATACAGGCAAAAGCAAGATTGACATTAGCATTAGGGCGGCTGGCTAGATATAAAGAATTCCCCCGCTATTCTAGTCCTTATTCTTATAAAGAAAGAAGTCTTTAGAA
Silene conica	2	cp	CAATTAAAATGTCACCTATTATGT	13-9	Silene_conica_mito_14	118262	A>G	AGGGCGGCTGGCTAGATATAAAGAATTCCCCCGCTATTCTAGTCCTTATTCTTATAAAGAAAGAAGTCTTTAGAAGTCGAATAAAGAGGATTGATTATCTTGGACTAAGCTACATAAGAGCTGACTCCCCCTCTTATGCCAATTCACTTGCGGATAAGTAAACTTAGATCCTATAATGCTCTAATGCGCCTGTCATTGAAGAGCTTTA
Silene conica	2	cp	AAAGAGCCATTGTATAAGACTAAG[R1]	10-8	Silene_conica_mito_14	118262	A>G	AGCATTAGGGCGGCTGGCTAGATATAAAGAATTCCCCCGCTATTCTAGTCCTTATTCTTATAAAGAAAGAAGTCTTTAGAAGTCGAATAAAGAGGATTGATTATCTTGGACTAAGCTACATAAGAGCTGACTC
Silene conica	2	cp	AATAGTAGCTGACCCCGAATTCCG[R2]	12-7	Silene_conica_mito_14	118262	A>G	TGAGATTCAACGGATAGAGCATCTTCTAATACAGGCAAAAGCAAGATTGACATTAGCATTAGGGCGGCTGGCTAGATATAAAGAATTCCCCCGCTATTCTAGTCCTTATTCTTATAAAGAAAGAAGTCTTTAG
Silene conica	2	cp	ACTCCGGCACGATAGCAAGCATTC[R1]	11-9	Silene_conica_mito_14	118262	A>G	ATCTTCTAATACAGGCAAAAGCAAGATTGACATTAGCATTAGGGCGGCTGGCTAGATATAAAGAATTCCCCCGCTATTCTAGTCCTTATTCTTATAAAGAAAGAAGTCTTTAGAAGTCGAATAAAGAGGATTG
Silene conica	3	cp	CAAGCTCTTTGCGTCGACAATGAT	14-11	Silene_conica_mito_14	118262	A>G	TCTTCTAATACAGGCAAAAGCAAGATTGACATTAGCATTAGGGCGGCTGGCTAGATATAAAGAATTCCCCCGCTATTCTAGTCCTTATTCTTATAAAGAAAGAAGTCTTTAGAAGTCGAATAAAGAGGATTGATTATCTTGGACT
Silene conica	3	cp	AATTACTAACCTTATTCCTACTAT[R2]	6-4	Silene_conica_mito_14	118262	A>G	TAGATATAAAGAATTCCCCCGCTATTCTAGTCCTTATTCTTATAAAGAAAGAAGTCTTTAGAAGTCGAATAAAGAGGATTGATTATCTTGGACTAAGCTACATAAGAGCTGACTCCCCCTCTTATGCCAATTC
Silene conica	3	cp	CCCACAAAAGCGGAGCCTCCGGAA[R2]	15-7	Silene_conica_mito_14	118262	A>G	CGGCTGGCTAGATATAAAGAATTCCCCCGCTATTCTAGTCCTTATTCTTATAAAGAAAGAAGTCTTTAGAAGTCGAATAAAGAGGATTGATTATCTTGGACTAAGCTACATAAGAGCTGACTCCCCCTCTTAT
Silene conica	3	cp	CGCACGCTGCGCTCAAAACTAATT[R1]	12-3	Silene_conica_mito_14	118262	A>G	CATTAGGGCGGCTGGCTAGATATAAAGAATTCCCCCGCTATTCTAGTCCTTATTCTTATAAAGAAAGAAGTCTTTAGAAGTCGAATAAAGAGGATTGATTATCTTGGACTAAGCTACATAAGAGCTGACTCCC
Silene conica	3	mt	AAGCAACATGCTTTCTCGATTTGA	29-17	Silene_conica_mito_14	118262	A>G	TAGAAATAGCTTCGTTCGGGTACAGAAGAAAGATGAGATTCAACGGATAGAGCATCTTCTAATACAGGCAAAAGCAAGATTGACATTAGCATTAGGGCGGCTGGCTAGATATAAAGAATTCCCCCGCTATTCTAGTCCTTATTCTTATAAAGAAAGAAGTCTTTAGAAGTCGAATAAAGAGGATTGATTATCTTGGACTAAGCTACATAAGAGCTGACTCCCCCTCTTATGCC
Silene conica	3	mt	ATAGCTGTTCGGGACGCCCCAACA[R1]	15-14	Silene_conica_mito_14	118262	A>G	AGAGCATCTTCTAATACAGGCAAAAGCAAGATTGACATTAGCATTAGGGCGGCTGGCTAGATATAAAGAATTCCCCCGCTATTCTAGTCCTTATTCTTATAAAGAAAGAAGTCTTTAGAAGTCGAATAAAGAG
Silene conica	3	mt	CGGAATTTCGTACTAGCTCACATC[R1]	29-17	Silene_conica_mito_14	118262	A>G	GGCTAGATATAAAGAATTCCCCCGCTATTCTAGTCCTTATTCTTATAAAGAAAGAAGTCTTTAGAAGTCGAATAAAGAGGATTGATTATCTTGGACTAAGCTACATAAGAGCTGACTCCCCCTCTTATGCCAA
Silene conica	3	mt	ATGCGTTAAGACCAACCCTCGACA[R1]	21-7	Silene_conica_mito_15	24932	A>G	TGATACATAACAACAACTCTACCTGCACCCTCTGTCTTTTCTTAGGCTGTATCGGAATAACTTTAGATTCGAAGATAATAACCCCCTCGCCACCTCTGTTTAAGAATAGACTAATGCCAGGACGGACTATTCT
Silene conica	1	mt	AAGACACAAACCCTTAGTCTGCTT	18-10	Silene_conica_mito_15	27012	A>G	CGTAGCACACTTCCGGTGTAGACTTCGCCTAAAAGCTAACCCCCCAAAAGTTACCAATCAACTAAGGAAAAAGCGGGTGGTTGCGCACTTATAGGGAAAGAGAGTAGGAGAGAGTTTCCTTTCTTTCTTTAAATTAAAGAGGCCTCCTTGTTGACTTGGCTTGAAAGAAGGCATAGGAGTAC
Silene conica	3	cp	GACATCATAACGTCGTGTCCTCAG[R1]	10-8	Silene_conica_mito_15	27012	A>G	TGTAGACTTCGCCTAAAAGCTAACCCCCCAAAAGTTACCAATCAACTAAGGAAAAAGCGGGTGGTTGCGCACTTATAGGGAAAGAGAGTAGGAGAGAGTTTCCTTTCTTTCTTTAAATTAAAGAGGCCTCCTT
Silene conica	3	cp	AACAAAATAACAGAGCAGCGACTC	11-6	Silene_conica_mito_15	27012	A>G	TTATAGGCCGACATATTGCATTATAGCGCCTGCGGTCCATTCAACGAAATGGAGCAAACTTCCCAACTCGACATGCCGTAGCACACTTCCGGTGTAGACTTCGCCTAAAAGCTAACCCCCCAAAAGTTACCAATCAACTAAGGAAAAAGCGGGTGGTTGCGCACTTATAGGGAAAGAGAGTAGGAGAGAGTTTCCTTTC
Silene conica	3	cp	CCCGCCCTTCCTGTGGTTTCGCAA	13-12	Silene_conica_mito_15	27012	A>G	ACAAGGAATGAGAAAACTTTCCCACGAGGGTGGTGTTTGTTATAGGCCGACATATTGCATTATAGCGCCTGCGGTCCATTCAACGAAATGGAGCAAACTTCCCAACTCGACATGCCGTAGCACACTTCCGGTGTAGACTTCGCCTAAAAGCTAACCCCCCAAAAGTTACCAATCAACTAAGGAAAAAGCGGGTGGTTGC
Silene conica	3	mt	TGTACACACAACTTTTCAGAATTA[R1]	20-11	Silene_conica_mito_16	3753	A>G	AAGAAATTAATAAGTAGGTATATGTAGGAGAGAGTCCACCAGTCTATCAAAGGGAATCTTCTACCTTTAGAGCTCCTTCCTTTGCTCGCTTCATCAGTTCTGATCGCCATTCGAAACCCCCTTTTTCCTTTTG
Silene conica	2	cp	ATGAAAACGCGACGGTTCTCCCCA[R1]	9-5	Silene_conica_mito_16	19050	A>G	TCTCTCCTCGAATTTTAGGAAATAGGATCTCCCAGGTGAGCTCCTTTTTTTCTTGTTTGTCAGAACGAACGGCATCCTATCAAAAGACAAGTTGTTCGTGACGTACGGCTCCGGCCACTGGTGGGAAACTTAA
Silene conica	3	mt	AAATCCTGACGTGATTATACCACG	19-10	Silene_conica_mito_16	51886	A>C	TAGCTCGACTAAAAGGAGAGGCGCGTAGCCTGGCGACCGTAGGAGATTTATCTGTCGACCGGGAGGCCCCTTGTGGTGATGAATTCGCTCGACTGGTAAGGAGAGGGATGAGAGTGTTAGCGAGAGGGAGAGAACCTGAAAAGGGGGGGACTGAGGAACGAAGGAGCGGGGAGATAAGCCCGGGGGATTGACCGAGGATTTAGGGAGAGGAGATAGAGTAGAGAAGAGGT
Silene conica	1	mt	CACAGCCTTACCTTATCTAAATCA[R1]	14-14	Silene_conica_mito_16	61407	A>G	GCCTTTATACTCACGCGCGTACTTTAATATATCTGTGTTCTTTCGAACTTGTTTACCCCGATCCATCGTACCTTAGCAGTCTCATCCCGGTCCTTCTAACCCCTCCGGCCCTCCCCTTTTAATCGAGTCTCAT
Silene conica	1	mt	CATCTGCCGAACCTCGGTCGACTA[R2]	12-12	Silene_conica_mito_16	67308	C>T	TTAGAATCAAAATAGATTTCGCATCAGTTCGAATAGGCAGTTTTCAAGTCAGAAGTTGATCTCGGGAATGCCTTTCAATGTATTTCTCTTTCAAGCAGCTCTCGACTTACCACTGACCCTAGGCAGAGGAGCG
Silene conica	1	mt	CAGGAACAAACTCCCCCGCATTTA[R1]	14-5	Silene_conica_mito_16	85278	A>G	CTTTGCTCAGTCGCGAAATCACAAGCGTGGAAGAAAAAAGTCAGGAAAAAGTGGGCCCTCAAGGCGGAAAACGGTTTCAGTCGCCAAATCACATATGTGGAAAGAATTTTTTCATAAAAAAGTACCACTCATT
Silene conica	3	mt	ACGCAAATATTCGACGAACTTCCG	21-18	Silene_conica_mito_16	85278	A>G	TCTCCTCTCGCTTTGCTCAGTCGCGAAATCACAAGCGTGGAAGAAAAAAGTCAGGAAAAAGTGGGCCCTCAAGGCGGAAAACGGTTTCAGTCGCCAAATCACATATGTGGAAAGAATTTTTTCATAAAAAAGTACCACTCATTAGTGAAATTCGGGTTCAGTCACGAATTCCCCGGTTGGGAGAACCTTTTCGCTCGTTTTTGCCCATTTTCAAGCCCAGACAAAGGGG
Silene conica	3	mt	CTGTTCTACCACTCTTAACGAAGG[R1]	27-5	Silene_conica_mito_16	85278	A>G	AAGGCCCTCTCCTCTCGCTTTGCTCAGTCGCGAAATCACAAGCGTGGAAGAAAAAAGTCAGGAAAAAGTGGGCCCTCAAGGCGGAAAACGGTTTCAGTCGCCAAATCACATATGTGGAAAGAATTTTTTCATA
Silene conica	1	mt	ACCTTCTTGTTCCCCGCCACGTAA[R1]	23-10	Silene_conica_mito_16	87724	A>G	TCCCGTATACCTTCTTTATTAATAACAACTAGAAAAATAGCGGAAAGACTGGGGATTGGGAGCTTAAGTTGGCCAGCACTAACTGAGGTTGCATTCAACAGGGCATCCCCCCTTCAAGCACAATCTTGTAATA
Silene conica	3	cp	CGTACCCTACTCTGAAGACTAAAG[R2]	13-12	Silene_conica_mito_16	87724	A>G	ATTAATAACAACTAGAAAAATAGCGGAAAGACTGGGGATTGGGAGCTTAAGTTGGCCAGCACTAACTGAGGTTGCATTCAACAGGGCATCCCCCCTTCAAGCACAATCTTGTAATATAAAGAAGGTCCCGTAT
Silene conica	3	cp	CAACCCTCTTTTGTACCCACTAAA[R1]	15-4	Silene_conica_mito_16	87724	A>G	TATTAATAACAACTAGAAAAATAGCGGAAAGACTGGGGATTGGGAGCTTAAGTTGGCCAGCACTAACTGAGGTTGCATTCAACAGGGCATCCCCCCTTCAAGCACAATCTTGTAATATAAAGAAGGTCCCGTA
Silene conica	3	cp	GCCGTAGCTCCCTACAAGGCGGAA	9-8	Silene_conica_mito_16	87724	A>G	TATTAATAACAACTAGAAAAATAGCGGAAAGACTGGGGATTGGGAGCTTAAGTTGGCCAGCACTAACTGAGGTTGCATTCAACAGGGCATCCCCCCTTCAAGCACAATCTTGTAATATAAAGAAGGTCCCGTATAAATGGAATCTTCTTTTTCTC
Silene conica	3	cp	GTCGCCCAGGCGTGTACCCCGCGC[R2]	11-11	Silene_conica_mito_16	87724	A>G	TGGGGATTGGGAGCTTAAGTTGGCCAGCACTAACTGAGGTTGCATTCAACAGGGCATCCCCCCTTCAAGCACAATCTTGTAATATAAAGAAGGTCCCGTATAAATGGAATCTTCTTTTTCTCTTAAGGTCTAC
Silene conica	3	mt	CAATACTCCGTCGGCGTGTTGTCG	29-21	Silene_conica_mito_16	87724	A>G	AGCACTAACTGAGGTTGCATTCAACAGGGCATCCCCCCTTCAAGCACAATCTTGTAATATAAAGAAGGTCCCGTATAAATGGAATCTTCTTTTTCTCTTAAGGTCTACTAGCAGTGCTTTGCTACTTGCTTCTTAGTTGACAGAATGAGACGTTCCCCGGCCTTTGCCTTTTCTTTCTCTAGAGATACGGGCCTTAAGAAGC
Silene conica	3	mt	CGTTGCTGACCATATCGACGCTTG[R1]	10-10	Silene_conica_mito_16	87724	A>G	AAGACTGGGGATTGGGAGCTTAAGTTGGCCAGCACTAACTGAGGTTGCATTCAACAGGGCATCCCCCCTTCAAGCACAATCTTGTAATATAAAGAAGGTCCCGTATAAATGGAATCTTCTTTTTCTCTTAAGG
Silene conica	3	mt	CGGTGGTCCAGTGACGAAATATTC[R1]	24-13	Silene_conica_mito_16	87724	A>G	ACTGAGGTTGCATTCAACAGGGCATCCCCCCTTCAAGCACAATCTTGTAATATAAAGAAGGTCCCGTATAAATGGAATCTTCTTTTTCTCTTAAGGTCTACTAGCAGTGCTTTGCTACTTGCTTCTTAGTTGA
Silene conica	2	cp	ACCTATCCGTCAAGCAACGAGCAG	16-6	Silene_conica_mito_16	89113	A>C	CTATTGTTCTAATTAGAGCAAAAAGCGCTTAAGAGAGTGAATGAGACTGGGCTTAATACCCAAGGAAGCTCGCCCCATACATAAGGAGAAAGGAGGAACGAGGGCGCACGTTAGTGAGAGGAATGAGACTGAGATACGAGGAGCGTAGCCTTGTTGTTCTATCCGCGGCGGCACTTGGCCAGAGAGAGAGGGCGATGCCCCTATCAGCCCAAACCCCTAAGTGTGAATATGAGAAAG
Silene conica	2	cp	GCACCACGATAAGTGAAGGCGAAT	12-11	Silene_conica_mito_16	89113	A>C	AATGAGACTGAGATACGAGGAGCGTAGCCTTGTTGTTCTATCCGCGGCGGCACTTGGCCAGAGAGAGAGGGCGATGCCCCTATCAGCCCAAACCCCTAAGTGTGAATATGAGAAAGAGTCTTTTCTCTTACAACTACCGAAGAGGGCTTTGCCTTTCTATCAAGTT
Silene conica	3	cp	AGATACATGTACTGAAAATTGAAA	8-8	Silene_conica_mito_16	89113	A>C	GTAGCCTTGTTGTTCTATCCGCGGCGGCACTTGGCCAGAGAGAGAGGGCGATGCCCCTATCAGCCCAAACCCCTAAGTGTGAATATGAGAAAGAGTCTTTTCTCTTACAACTACCGAAGAGGGCTTTGCCTTTCTATCAAGTTTCTTCTTTGTTGTTACAATTGGGTTACAGGTGA
Silene conica	3	mt	CACTACGATAAAGCCAGTCGATCG[R1]	25-10	Silene_conica_mito_16	89113	A>C	GGGCGATGCCCCTATCAGCCCAAACCCCTAAGTGTGAATATGAGAAAGAGTCTTTTCTCTTACAACTACCGAAGAGGGCTTTGCCTTTCTATCAAGTTTCTTCTTTGTTGTTACAATTGGGTTACAGGTGAAG
Silene conica	1	cp	CTGTTTAAAATGGAAACCCCAGAA	20-18	Silene_conica_mito_16	92311	A>G	TCCCCTCTCTTTCCTCTTGAAAAAGCAATGAACTCTGCGATGGCTACTGAAAAACGGACCCGCCTTTACTCTCGGAACCTTAAAAAGTCTCAAAAATTAGTGAAGATTGATAGCATCATTCAAGTAAATGCAGATTAAGATCGTAAAGACATAAGCTTGTAATATAGCTACACCTAATTCCAGACCTGTTAATGCAAGAACTATAAAGAATGGACCAAGATCCCCGAT
Silene conica	1	mt	AATGACCACTGCTGCACCTTGGAA	26-10	Silene_conica_mito_16	92311	A>G	AGGATAGTTTTGCACCTGACTTAGATCAACTACTAGTCCCCTCTCTTTCCTCTTGAAAAAGCAATGAACTCTGCGATGGCTACTGAAAAACGGACCCGCCTTTACTCTCGGAACCTTAAAAAGTCTCAAAAATTAGTGAAGATTGATAGCATCATTCAAGTAA
Silene conica	3	cp	CACAACTCAGTACCAATACAACCT	10-9	Silene_conica_mito_16	92311	A>G	TTCCTGCTGGCTGTCTTATATTAGAGCTTGCGCGTAAGGGGCAAGATTCTTTACAAGAACCCTGATGATTAAGGTAAGGGGCGGGCTGTTTGCTCTTTGTTCAGGATAGTTTTGCACCTGACTTAGATCAACTACTAGTCCCCTCTCTTTCCTCTTGAAAAAGCAATGAACTCTGCGATGGCTACTGAAAAACGGACCCGCCTTTACTCTCGGAACCTTAAAAAGTCTCAAAAATTA
Silene conica	3	mt	AGTCTCACCAGATATAGACTATTA[R2]	23-23	Silene_conica_mito_16	92311	A>G	AAAGCAATGAACTCTGCGATGGCTACTGAAAAACGGACCCGCCTTTACTCTCGGAACCTTAAAAAGTCTCAAAAATTAGTGAAGATTGATAGCATCATTCAAGTAAATGCAGATTAAGATCGTAAAGACATAA
Silene conica	1	mt	AAAACTCGTAATGGCGTCAGCAAT[R2]	13-8	Silene_conica_mito_16	101099	C>G	TCTCTTCCCCTGCTGGTCTTCGCCCTCTCTTAAACTTCTTGTTTATATGCGATCCCACGTCTGTGCTGCTATCTCCTCTCACTACCGACCTTCACGTTCTTTCGACCTTATGGTCGCGCCATCAATACCCTTA
Silene conica	2	cp	CTTGATTTACCAGGTAGGGAAACC	14-9	Silene_conica_mito_16	113668	A>C	AGAAGTCTCTCCTTATGCAGAGGAAGAAATGCCGCGCCTTTAGATTCGAATTCTACTTTATTTCTTGGCGGCCAAGAAAGGCGCGGATCGTCTTGTCTTTAACAGTTCTTCATAGCAGACTCATCAGCTGTTTGTGAAGTATGGATAGAGGCTCCCTTTGCTTTCTCGGGACAAACTCTACTTTAGGTATCTAGTCCTTTTTCTCTTTCTTTTTG
Silene conica	3	mt	ACCAGGCCACGAATTAAAGATAGA	26-7	Silene_conica_mito_16	113668	A>C	ATTCTACTTTATTTCTTGGCGGCCAAGAAAGGCGCGGATCGTCTTGTCTTTAACAGTTCTTCATAGCAGACTCATCAGCTGTTTGTGAAGTATGGATAGAGGCTCCCTTTGCTTTCTCGGGACAAACTCTACTT
Silene conica	2	cp	AATGAGGACTACTCCCATCACCGA	10-9	Silene_conica_mito_17	3601	C>T	CTTTATATTCTAGAAGCAGTAAGTAAAGGTTCACGCTATGACTCTATATGACAAACTTTCTCATTTTATGGTAAAATAGGGCAGAGCGCACCCTTTGACTTCAGGATGCGGCTTTTTTTCGTTTAAACAATTTCTTTTAAACTCGGAACCTCATTAACAAAGAGGAGGGCACTAGCCTCGAAGTTACAAAG
Silene conica	1	cp	AAGACAATGTTCGGATATAATATC[R2]	26-22	Silene_conica_mito_17	47476	A>G	CCCAAGAGTCTTTGCTTCCTTTCTTTTTTCATGGGGTGAAGAGCGGTAGTGAGTAAGAATGAAGTCGAAAGCTTGCGTTCTCTCCCGTTCGAAGCTGTCTCATAAGGGAGTCTCGCTGCTTAAGAGAGAGTCT
Silene conica	1	cp	CCAGAATCACTCTGTACTGAACGA	25-21	Silene_conica_mito_17	47476	A>G	CTTTTTTCATGGGGTGAAGAGCGGTAGTGAGTAAGAATGAAGTCGAAAGCTTGCGTTCTCTCCCGTTCGAAGCTGTCTCATAAGGGAGTCTCGCTGCTTAAGAGAGAGTCTTTGAATTTGCTTTTGTTCTCCTCTTCTCT
Silene conica	1	mt	AAAGCTTTATGGTCAGCCACCAGA	19-14	Silene_conica_mito_17	47476	A>G	CCAAGAGTCTTTGCTTCCTTTCTTTTTTCATGGGGTGAAGAGCGGTAGTGAGTAAGAATGAAGTCGAAAGCTTGCGTTCTCTCCCGTTCGAAGCTGTCTCATAAGGGAGTCTCGCTGCTTAAGAGAGAGTCTTTGAATTTGCTTTTGTTCTCCTCTTCTCTGTTTAACTCGCTATCTTTAATGGCTTTGATTTCGTTTCTTTGTTACTTGGCGTGTGGAATGATTCT
Silene conica	1	mt	ATGCTCAGTAACCCGTATGTTGAC	24-11	Silene_conica_mito_17	47476	A>G	AAGAGCGGTAGTGAGTAAGAATGAAGTCGAAAGCTTGCGTTCTCTCCCGTTCGAAGCTGTCTCATAAGGGAGTCTCGCTGCTTAAGAGAGAGTCTTTGAATTTGCTTTTGTTCTCCTCTTCTCTGTTTAACTCGCTATCTTTAATGGCTTTGATTTCGTTTCTTTGTTACTTGGCGTGTGGAATGATTCTTCTTTTCTGCCTCTCTTTATCTTT
Silene conica	1	mt	GAGGTATTATACTGAGGGATTAAA[R2]	16-3	Silene_conica_mito_17	47476	A>G	CTTCCTTTCTTTTTTCATGGGGTGAAGAGCGGTAGTGAGTAAGAATGAAGTCGAAAGCTTGCGTTCTCTCCCGTTCGAAGCTGTCTCATAAGGGAGTCTCGCTGCTTAAGAGAGAGTCTTTGAATTTGCTTTT
Silene conica	1	mt	ATAAAAAGAACTCCCCCCAAAATA	14-8	Silene_conica_mito_17	47476	A>G	AATGAGTCTTCTTTTTTCGATTCCCATATTCGTATATTAAGTAGGAAGCTTGATGTTTGACTTTGGATCAGTCCCAAGAGTCTTTGCTTCCTTTCTTTTTTCATGGGGTGAAGAGCGGTAGTGAGTAAGAATGAAGTCGAAAGCTTGCGTTCTCTCCCGTTCGAAGCTGTCTCATAAGGGAGTCTCGCTGCTTAAGAGAGAGTCTTTGA
Silene conica	2	cp	ACTCTCTTTAACTTTTAACTTAAG[R2]	14-10	Silene_conica_mito_17	47476	A>G	TCTCCCGTTCGAAGCTGTCTCATAAGGGAGTCTCGCTGCTTAAGAGAGAGTCTTTGAATTTGCTTTTGTTCTCCTCTTCTCTGTTTAACTCGCTATCTTTAATGGCTTTGATTTCGTTTCTTTGTTACTTGGC
Silene conica	3	mt	GAGGGCTACAACTACCCGAGCGAT	18-17	Silene_conica_mito_17	47476	A>G	AGAGTCTTTGCTTCCTTTCTTTTTTCATGGGGTGAAGAGCGGTAGTGAGTAAGAATGAAGTCGAAAGCTTGCGTTCTCTCCCGTTCGAAGCTGTCTCATAAGGGAGTCTCGCTGCTTAAGAGAGAGTCTTTGAATTTGCTTTTGTTCTCCTCTTCTCTGTTTAACTCGCTATCTT
Silene conica	1	mt	CCCTGCAGAGCTCCGTACGGAGCT	18-11	Silene_conica_mito_17	67656	A>G	GTCGACATCACTCTGTGCTTTCTCCTTTCAGTCGCCCTTTCACTATCTCTACTATACCTCCTTCATTCTTCAGTCGCTCTTTCACCCTTCTCCTCCCCTTTAAGGAAAGGGTGAGTCTTCTCCTCTCCTTACCAGTCTTCTCCCTGTCTCACTAGCGTTCGCCCTTTCGCCTTCGGGCTTTCTCCTTTCAGTCGCCCTCT
Silene conica	1	mt	CTCACAGAGGGGTACCAAGACGAA[R2]	12-7	Silene_conica_mito_17	67656	A>G	CATCACTCTGTGCTTTCTCCTTTCAGTCGCCCTTTCACTATCTCTACTATACCTCCTTCATTCTTCAGTCGCTCTTTCACCCTTCTCCTCCCCTTTAAGGAAAGGGTGAGTCTTCTCCTCTCCTTACCAGTCT
Silene conica	1	mt	AGCCTGGAGCTTTCCTGTCGGCCA[R1]	20-10	Silene_conica_mito_17	67656	A>G	CATCACTCTGTGCTTTCTCCTTTCAGTCGCCCTTTCACTATCTCTACTATACCTCCTTCATTCTTCAGTCGCTCTTTCACCCTTCTCCTCCCCTTTAAGGAAAGGGTGAGTCTTCTCCTCTCCTTACCAGTCT
Silene conica	1	mt	GGATTCGGGTAGTTCGACCACCAC[R1]	24-22	Silene_conica_mito_17	67656	A>G	TTCACCCTTCTCCTCCCCTTTAAGGAAAGGGTGAGTCTTCTCCTCTCCTTACCAGTCTTCTCCCTGTCTCACTAGCGTTCGCCCTTTCGCCTTCGGGCTTTCTCCTTTCAGTCGCCCTCTCCTCCACTTCCTT
Silene conica	2	cp	AATATGAAATCTGACTCAAATCAA	15-8	Silene_conica_mito_17	67656	A>G	CCTTTCAGTCGCCCTTTCACTATCTCTACTATACCTCCTTCATTCTTCAGTCGCTCTTTCACCCTTCTCCTCCCCTTTAAGGAAAGGGTGAGTCTTCTCCTCTCCTTACCAGTCTTCTCCCTGTCTCACTAGCGTTCGCCCTTTCGCCTTCGGGCTTTCTCCTTTCAGTCGCCCTCTCCTCCACTTCCTTTGTCAGTAGAGTCTCTTTATCCTCACCTTCAT
Silene conica	2	cp	CCGGTAAATGCTCGCCATCAAATT	15-5	Silene_conica_mito_17	67656	A>G	CAATACCTCTTCGGGCTCATCTCCTTCTAGTCGACATCACTCTGTGCTTTCTCCTTTCAGTCGCCCTTTCACTATCTCTACTATACCTCCTTCATTCTTCAGTCGCTCTTTCACCCTTCTCCTCCCCTTTAAGGAAAGGGTGAGTCTTCTCC
Silene conica	3	cp	ACGGACTAGGAAGAAATCGACAAC	18-4	Silene_conica_mito_17	67656	A>G	TTCCTCTCACTAACGTTCGACCTCGATTCTCGTAACCTCTCCCCATCACATGCGTTCGAGCCTATCTCCTCAGTCAATACCTCTTCGGGCTCATCTCCTTCTAGTCGACATCACTCTGTGCTTTCTCCTTTCAGTCGCCCTTTCACTATCTCTACTATACCTCCTTCATTCTTCAGTCGCTCTTTCACCCTTCTCCTCCCCTTTAAGGAAAGGGTGAGTCTTCTCCTCTCCTTACCA
Silene conica	3	mt	CGTCCTCTCATGTAAGCAAAAGTA	14-12	Silene_conica_mito_17	67656	A>G	CTATACCTCCTTCATTCTTCAGTCGCTCTTTCACCCTTCTCCTCCCCTTTAAGGAAAGGGTGAGTCTTCTCCTCTCCTTACCAGTCTTCTCCCTGTCTCACTAGCGTTCGCCCTTTCGCCTTCGGGCTTTCTCCTTTCAGTCGCCCTCTCCTCCACTTCCTTTGTCAGTAGAGTCTCTTTATCC
Silene conica	3	mt	CGGCGGTATAAAGGCAATGCGGTT	24-18	Silene_conica_mito_17	67656	A>G	AGTCAATACCTCTTCGGGCTCATCTCCTTCTAGTCGACATCACTCTGTGCTTTCTCCTTTCAGTCGCCCTTTCACTATCTCTACTATACCTCCTTCATTCTTCAGTCGCTCTTTCACCCTTCTCCTCCCCTTTAAGGAAAGGGTGAGTCTTCTCCTCTCCTTACCAGTCTTCTCCCTGTCTCACTA
Silene conica	3	mt	TCACAGAAAGAATTTCAACATCCA[R1]	15-15	Silene_conica_mito_17	67656	A>G	TCGCCCTTTCACTATCTCTACTATACCTCCTTCATTCTTCAGTCGCTCTTTCACCCTTCTCCTCCCCTTTAAGGAAAGGGTGAGTCTTCTCCTCTCCTTACCAGTCTTCTCCCTGTCTCACTAGCGTTCGCCC
Silene conica	3	mt	TAGGATCAATGTTCGGAAATACAG[R2]	21-14	Silene_conica_mito_17	86647	A>G	CACTAAGACAAAGGTTCTTTATATATGTGCATGTGATTTCGGGGCGTGGGTCCGTAGGGTGGACTCGCCTAGCAAATAAAAGAAGTAGATTGATTCTATGGGGGTTCCTTACTCTATCTTAGCTCATATTACG
Silene conica	1	mt	GGCCAACAACCGTAATCGAGAGAT	17-14	Silene_conica_mito_17	115327	A>C	ACCGCCCCTTTTCTTTTTTCTTTCTTTGTCTGGCTTATATATAAAAGAGACGGTGTGATCAACCTGTGATTGAAGCCCCATCTCCTCTTATAACATCACATCCCGCGGAGAAAGGCTTAGCTTAACATTCACCACAGAAGTTAAATCATTTATAGAGTAAGCTGAAGAAGCTGAATTGAGTACCTCGATGGGCCAGACGAAGAGAAG
Silene conica	1	cp	CCGGTACTGAAACTTGCGAGACCT	28-25	Silene_conica_mito_18	21872	A>G	TGAGTGTATCGAATTATCTTTCTTTTCTTTCTCCTCTACTTAGCAGCCGAGGCTAAATCCTCTCCTCTCCCGTTGGTCGAGCACTTTATAAGCTTATCTATCTCGCTATGCACTCGCTTCGCTCTCCTCCCCTCGCCCGCATACTTTGGACGAGCCTTTCTCCTCGGCATCATTCTTCAACCGAGCCCTTATC
Silene conica	1	mt	AGCCCGCCAAGAGAGATTCCAAGC	17-9	Silene_conica_mito_18	21872	A>G	TATCTATCTCGCTATGCACTCGCTTCGCTCTCCTCCCCTCGCCCGCATACTTTGGACGAGCCTTTCTCCTCGGCATCATTCTTCAACCGAGCCCTTATCCTTTTAGTCGAGAACTTTCTAAGCTTAACCCTTTCCTTCTTTCCTCTCACTAGCGTTCGACCTCATTCTTCTCCTCAGTCAAGCTCCCTCTTTGGGCT
Silene conica	1	mt	CACATTGGTCAACTCTGACCTAAC	17-6	Silene_conica_mito_18	21872	A>G	TTCCTTTGCTTGTGAGTGTATCGAATTATCTTTCTTTTCTTTCTCCTCTACTTAGCAGCCGAGGCTAAATCCTCTCCTCTCCCGTTGGTCGAGCACTTTATAAGCTTATCTATCTCGCTATGCACTCGCTTCGCTCTCCTCCCCTCGCCCGCATACTTTGGACGAGCCTTTCTCCTC
Silene conica	2	cp	GGCGTTCGAGGCTGTTTTGGAGAA[R1]	18-8	Silene_conica_mito_18	21872	A>G	CTTATCTATCTCGCTATGCACTCGCTTCGCTCTCCTCCCCTCGCCCGCATACTTTGGACGAGCCTTTCTCCTCGGCATCATTCTTCAACCGAGCCCTTATCCTTTTAGTCGAGAACTTTCTAAGCTTAACCCT
Silene conica	3	cp	ACCACACAGATGATCGTGGGTTAC[R1]	20-5	Silene_conica_mito_18	21872	A>G	TTCTTTCTCCTCTACTTAGCAGCCGAGGCTAAATCCTCTCCTCTCCCGTTGGTCGAGCACTTTATAAGCTTATCTATCTCGCTATGCACTCGCTTCGCTCTCCTCCCCTCGCCCGCATACTTTGGACGAGCCT
Silene conica	3	mt	AAATGAGACATATCGGCGGACTAT	21-18	Silene_conica_mito_18	21872	A>G	TCTCCTCTACTTAGCAGCCGAGGCTAAATCCTCTCCTCTCCCGTTGGTCGAGCACTTTATAAGCTTATCTATCTCGCTATGCACTCGCTTCGCTCTCCTCCCCTCGCCCGCATACTTTGGACGAGCCTTTCTCCTC
Silene conica	1	mt	ACCAGATAGCGCCGGACCTGACAA[R2]	13-12	Silene_conica_mito_18	35118	A>G	AGAAATATTTACTTCTATTAGATAGAAGCCCTCACTGTCTAAGTAAAAAGAGCCCCCCCAAGACAATATACTAAAGTAATAGGAGTCACTCGTCGTACCAGTCCCCGAGCTTCGTCTGTATCTCTTTATCCTT
Silene conica	3	mt	CTCGACGTCATCGCTCTTGCATTG	24-14	Silene_conica_mito_18	35118	A>G	CTCACCTCAGACTGACTCTCTCTCGAATTAAAAGAGGACGCCTTGGGATTCATAGTAGGGAGGTTTTGCTGCCTCTTATCGTTCTCGTTACTGATAGAAATATTTACTTCTATTAGATAGAAGCCCTCACTGTCTAAGTAAAAAGAGCCCCCCCAAGACAATATACTAAAGTAATAGGAGTCACT
Silene conica	1	cp	CCGCACCCTCGCTATACTATGCCC[R1]	22-20	Silene_conica_mito_18	47319	A>G	CAGCCTGCATCCTATCTCCTCTCACTAACCCTCTCTCCCCCCCCTTACCAGCCGAGTTCTTCACAGACCTCTCGCCTTGCTCGAGTGAGAAAAGAACCACTTCAGGTAGAACAAGGAAGAAAGACGCCTCATC
Silene conica	2	cp	AGGGCCATGCAACGTGTTGATGAT	17-9	Silene_conica_mito_19	31768	C>A	TAAAAAAAGACGGAGGCTTTCGGCATAGATTCATCCTAAGGCCTGATCCTTCGTCTTTTTCTATTTAGGCAATTTTTGTACCTTTTTCAAGGAAAGCGAAAAAAAGCAATCTTTTTTGGGAATTTACTAGTGGTACTCGACTAAAAGGAGAAGATAGAGTAGAGAGACTCGAGTGAATACGATATAAACCCTTGTGATAGCGACTAGA
Silene conica	1	mt	CCAAAGAAAGGCCCCATTCAACCT	13-11	Silene_conica_mito_19	33189	C>A	AAGTCCGTTGAAACCCATTAGGTTGAAACACTTTCCAAAAAAGGATCTTTTCACGCAAGTTGGTTTTACTTCGCGTTGTCAAATGTGAAAGCAAGAGCACAATAGAAAAAGGTCAGATTCTCTTCTTCTTCCTTATACTTATATATGTATGTACTTTGTCTGTCGTTGAGAAGAAAGTTCGCGGAAAAGAATTGAAA
Silene conica	3	mt	AGTATTCAGCAAGCCCCAATTCAC	19-8	Silene_conica_mito_19	64766	A>G	TCGGGTACCCTGTTTCGAATTTCAGCCTTTCTTCAACTATTCTTTTGGGAAACAGGGCGTTTACCCTATTTGATTTACTTTTCGAGTTGCTTTTCCTTCGGCTTGGACTTGTCCTCAGATCCCACTTTTCTAGGGGAAGCTTATTCTCTTTGGGACGACTGACTTAGGACAGAGACTCTTCAAAGAGTGAATTAAGATACCGAAGAACTTTT
Silene conica	3	mt	CGTTTTAGCAAAGCTCCCGGTCAT[R2]	13-3	Silene_conica_mito_19	64766	A>G	CCCTATTTGATTTACTTTTCGAGTTGCTTTTCCTTCGGCTTGGACTTGTCCTCAGATCCCACTTTTCTAGGGGAAGCTTATTCTCTTTGGGACGACTGACTTAGGACAGAGACTCTTCAAAGAGTGAATTAAG
Silene conica	3	cp	CACAGGCAATGCTACAAGCCTGAT	16-6	Silene_conica_mito_19	83773	C>A	TCTTACCTTTTGAAAATTAAAGTCTATGAGAAAAAACCCGTTTTCTTGGAATGCCCTGCTTTATCATACTTTTGCCTATTATATTTTTAGTTCACTGTCTTTACGTTTGTCAAAGAAAAGAGAAGATTTCTCACCTTACTTCGCATCACTGATCTATGTCTTCTTTTCCCTTGTAATTCTACTCTCTTTTTCCTCTTGGTGTATCTGTCCGATCAAGCTTAAAGTCAGAGAAC
Silene conica	2	cp	GACCATTGAAGCTTGATATATGAA	18-13	Silene_conica_mito_19	84732	A>G	CTTCCTCAAGAAACCGGTCCTCGGAAGTCTCGTATAGAACGCTCTCCCTGAACCACCCGGAACTCCGGTTGTAGCTGCTTTCGATCTCAGATAATTTAAATAGATAGAAGAAGTTAAGCTATGAGAATCCGCCCTTTCTTTAACGTTAAATCCCGTGTAAGAGTTCTCATTCTTATATACATAT
Silene conica	2	cp	CGCCGCGACCAATCGGCAGCAAAA[R2]	15-9	Silene_conica_mito_2	24412	A>T	CTCAACATCCCGCCCCGCTTTATTTAAGCTTCATCGTAAGCATAGGAAGTAGAGTAAATATCTGTCACAAAGAAGTAATACAGGCCAGTAGGGTTGCTTACGCGAGTAGTTAGTTTGTGTCGACGAAAGACTA
Silene conica	3	mt	CCTAGGGACGAGGCAATCAATCGA[R1]	25-3	Silene_conica_mito_2	40107	A>G	CGCAAAGAATACTGATCTTTGGCGACCTCGTTCTAACTTAATATGCAAACAAGAAGAGAAGGTCGTTATCGCCCTCAGCTCTCTAAGAAATGCCACTACAAAAACTTACTACCAGAAGTTCTTCTCACCAGGC
Silene conica	3	cp	GATAATACGAAGGTTGACTCGAAG[R2]	9-5	Silene_conica_mito_2	45211	C>G	ATTCTACTTAACCCTTCCCTTTACTAATAAATTCAAGTTATGTCAGTCAAGAATCACCGTCTTAGATCAACTGTTTCAAGAGTTTTCTCTCCATCAGCAGCTATTCTAATCAAAGCTTTTCTTTTAATTTCAC
Silene conica	1	cp	CAATCGGTCACAGGACTCATTCTC[R1]	23-21	Silene_conica_mito_2	90946	A>C	GATCAGTCTTAGGAAGAGATTTAGTTTAGATCCAATCATGTGTGGCTCAAGAGACTCTATTACCATTAAATTCTATCAAGGCGGGTTGCGTTATGTAAGAAACATATTATATATTAGATATTGACAAGTTAAG
Silene conica	1	cp	ATCTCACAAAAGCTTCGTCTACAC[R1]	31-13	Silene_conica_mito_2	90946	A>C	CTATCAAGGCGGGTTGCGTTATGTAAGAAACATATTATATATTAGATATTGACAAGTTAAGTTATATATGAATGTAATTTGCACTATTTGAATTTGGTTAGAGATATCAGCCGTTGTATGTAGTCAGAAAGAC
Silene conica	1	cp	CTATATGGGCCGGCGCCAATGTCG[R1]	25-24	Silene_conica_mito_2	90946	A>C	CAATCATGTGTGGCTCAAGAGACTCTATTACCATTAAATTCTATCAAGGCGGGTTGCGTTATGTAAGAAACATATTATATATTAGATATTGACAAGTTAAGTTATATATGAATGTAATTTGCACTATTTGAAT
Silene conica	1	mt	ATGGTAGACGCACCGCGACATCAT	19-15	Silene_conica_mito_2	90946	A>C	CTTTAGCCGCAGCTTATATAGGCGAATCCTTGGAGGGTCCTCATTGATCAGTCTTAGGAAGAGATTTAGTTTAGATCCAATCATGTGTGGCTCAAGAGACTCTATTACCATTAAATTCTATCAAGGCGGGTTGCGTTATGTAAGAAACATATTATATATTAGATATTGACAAGTTAAGTTATATATGAAT
Silene conica	1	mt	GAGAACGCGGGATAAAATTACACG[R2]	15-15	Silene_conica_mito_2	90946	A>C	CTATCAAGGCGGGTTGCGTTATGTAAGAAACATATTATATATTAGATATTGACAAGTTAAGTTATATATGAATGTAATTTGCACTATTTGAATTTGGTTAGAGATATCAGCCGTTGTATGTAGTCAGAAAGAC
Silene conica	1	mt	GCGCGACGACCATAATTAACACAT	18-8	Silene_conica_mito_2	90946	A>C	AGACTCTATTACCATTAAATTCTATCAAGGCGGGTTGCGTTATGTAAGAAACATATTATATATTAGATATTGACAAGTTAAGTTATATATGAATGTAATTTGCACTATTTGAATTTGGTTAGAGATATCAGCCGTTGTATGTAGTCAGAAAGACTCT
Silene conica	3	mt	AACACCCATCCGGGCCCAAGCCGC	24-23	Silene_conica_mito_2	90946	A>C	AGGGTCCTCATTGATCAGTCTTAGGAAGAGATTTAGTTTAGATCCAATCATGTGTGGCTCAAGAGACTCTATTACCATTAAATTCTATCAAGGCGGGTTGCGTTATGTAAGAAACATATTATATATTAGATATTGACAAGTTAAGTTATATATGAATGTAATTTGCACTATTTGAATTTGGTTAGAGATATCAGCCGTTGT
Silene conica	3	mt	CTATGATAAGCACTCCTAGTTCCG	24-19	Silene_conica_mito_2	90946	A>C	ATATAGGCGAATCCTTGGAGGGTCCTCATTGATCAGTCTTAGGAAGAGATTTAGTTTAGATCCAATCATGTGTGGCTCAAGAGACTCTATTACCATTAAATTCTATCAAGGCGGGTTGCGTTATGTAAGAAACATATTATATATTAGATATTGACAAGTTAAGTTATATATGAATGTAATTTGCACTATTT
Silene conica	3	mt	AACACGGGGCTGGACGTGCTAAGT[R2]	19-18	Silene_conica_mito_2	90946	A>C	CCTCATTGATCAGTCTTAGGAAGAGATTTAGTTTAGATCCAATCATGTGTGGCTCAAGAGACTCTATTACCATTAAATTCTATCAAGGCGGGTTGCGTTATGTAAGAAACATATTATATATTAGATATTGACA
Silene conica	3	mt	ACATTGTAGTGCGGGCCGCCAAAC[R1]	18-14	Silene_conica_mito_2	90946	A>C	TAGGAAGAGATTTAGTTTAGATCCAATCATGTGTGGCTCAAGAGACTCTATTACCATTAAATTCTATCAAGGCGGGTTGCGTTATGTAAGAAACATATTATATATTAGATATTGACAAGTTAAGTTATATATG
Silene conica	3	mt	CGACCAACATACCTGCGAGGACCT	25-13	Silene_conica_mito_2	90946	A>C	GATCAGTCTTAGGAAGAGATTTAGTTTAGATCCAATCATGTGTGGCTCAAGAGACTCTATTACCATTAAATTCTATCAAGGCGGGTTGCGTTATGTAAGAAACATATTATATATTAGATATTGACAAGTTAAGTTATATATGAATGTAATTTGCACTATTTGAATTTGGTTAGAGATATCAGCCGTTGTATGTAGTCAGAAAGACTCTCCGATTAGTA
Silene conica	3	mt	ATGTTAATGATTTTCGACTCAGCG	31-10	Silene_conica_mito_2	90946	A>C	GGGGGATTCGGGCTCTTATTTTTGAAGCTTTAGCCGCAGCTTATATAGGCGAATCCTTGGAGGGTCCTCATTGATCAGTCTTAGGAAGAGATTTAGTTTAGATCCAATCATGTGTGGCTCAAGAGACTCTATTACCATTAAATTCTATCAAGGCGGGTTGCGTTATGTA
Silene conica	3	mt	CCTTGAAGCGTACGTGTCCGCCTG[R1]	16-11	Silene_conica_mito_2	93400	A>G	AGGGAAAGCACTTGGGCTTACATTATACTACCGGTCTATTACGCTCTTCTTGTTCTAATTCTAAAAGTGAGGAGCGCTTCCTCTTTGTGCAGACTTTCCAATAGAAGAGCTATTAATAACTTCCCATTCATCC
Silene conica	3	cp	GATACAAATCTCTGTATTGATATC	12-9	Silene_conica_mito_2	115485	A>G	TATTAGTGACTGCATTGATCGATGACTGAACAAATGCACCTCTTGATAGGTACACAGCTGAAGTTCAATAGCGGCTTTCTTCGCTATCCGCAGGCTCCACACCCCCTTTACAAAGAAAGCTGAGTCCCCTGTCGAGTTGGTAAACCCCCAGATTATAACACTTTTCGCTTGCTCCGCCTTTCT
Silene conica	1	mt	ATGATTTGTCTCGGCCTTAAAACG[R1]	25-12	Silene_conica_mito_2	124251	A>G	ACTGTCTGCTGTAAATGGAAGATCCAGCCCTTACTTCTCCTACTTTAAAAAGAAAGGTTATAAAGAAGAGCTTATTAGAGCAATTAGCGTAGGAGAGTTCCGTATGAGTCAAGGCCATACCAAGGAAAGAAAG
Silene conica	3	mt	CGGACTGGCACTGACTATACTGGG[R1]	23-21	Silene_conica_mito_2	154477	A>G	AATCTTAGTTCTAGGAACTAATCATATGAATAGCTTTGCTTTCACTTATGAGATAAGAAGAGGATCCATCAAATCGCGGAGAAAGATTAGCAGCAACCCTACTAACTCTAATGCATCTATAATGCTTTAATCA
Silene conica	3	cp	AAGAGAAAGATAGGCTTACCTCCA	19-6	Silene_conica_mito_20	33333	C>T	AGGGTTCTTTTATCACGTCAACTCTTATCTTACTACGTTAGCGCTCGTTTATTCGAGAAGAGAGGTAGATGACCAAATAGCCTTTATAGGAAGAGTTATAAAAGCAACTTTGGATATCGAAACCAAAGAAAGCCCGTGTTCACGAGCGTAAAACCGCGCCAAAGCTTGTTCATCCTTCTACTTCTT
Silene conica	1	cp	AGCCCAATCGAACGTACAGACCCA	20-16	Silene_conica_mito_20	102236	A>G	TGCCGATCATGACTTTGTTTAGCCCGGTTCCTCTTTTAAAGTACACCCGGGGCCTTTTTTTCAAAAGGCGTTCTTTCGCGGTTAACTCCCACCGCCGCAGAACCATCCCACGACTGCTTGTAAGACGGCCAAGCCTATTAAAGCAACTC
Silene conica	1	mt	CTACCCGCTCATTTAACTTGCCGA[R1]	18-18	Silene_conica_mito_20	102236	A>G	CCCGGTTCCTCTTTTAAAGTACACCCGGGGCCTTTTTTTCAAAAGGCGTTCTTTCGCGGTTAACTCCCACCGCCGCAGAACCATCCCACGACTGCTTGTAAGACGGCCAAGCCTATTAAAGCAACTCCTACTA
Silene conica	1	mt	AAAGCAATGCCGCTCACTCCTCCC[R2]	11-10	Silene_conica_mito_20	102236	A>G	TTTGTTTAGCCCGGTTCCTCTTTTAAAGTACACCCGGGGCCTTTTTTTCAAAAGGCGTTCTTTCGCGGTTAACTCCCACCGCCGCAGAACCATCCCACGACTGCTTGTAAGACGGCCAAGCCTATTAAAGCAA
Silene conica	2	cp	AAAAACCTTAGCATAACAGGATTA[R1]	12-11	Silene_conica_mito_20	102236	A>G	TATCTAGCCGAACTGCCGATCATGACTTTGTTTAGCCCGGTTCCTCTTTTAAAGTACACCCGGGGCCTTTTTTTCAAAAGGCGTTCTTTCGCGGTTAACTCCCACCGCCGCAGAACCATCCCACGACTGCTTG
Silene conica	3	cp	ATGTGATCATCTCACTCAGTAATT	13-9	Silene_conica_mito_20	102236	A>G	CTCTTTTAAAGTACACCCGGGGCCTTTTTTTCAAAAGGCGTTCTTTCGCGGTTAACTCCCACCGCCGCAGAACCATCCCACGACTGCTTGTAAGACGGCCAAGCCTATTAAAGCAACTCCTACTAGATTGCATACTCTCTCATAAAAGGATAGTTCTACCTTTATGTGAGGGAGACCAGGAGT
Silene conica	3	cp	CAGAAAGAAACGGCCGACAGGACT	12-7	Silene_conica_mito_20	102236	A>G	TCATGACTTTGTTTAGCCCGGTTCCTCTTTTAAAGTACACCCGGGGCCTTTTTTTCAAAAGGCGTTCTTTCGCGGTTAACTCCCACCGCCGCAGAACCATCCCACGACTGCTTGTAAGACGGCCAAGCCTATTAAAGCAACTCCTACTAGATTGCATACTCTCTCATAAAAGGATAGTT
Silene conica	3	cp	TCCGTAAAAGCATTTGGAAATAAG	19-8	Silene_conica_mito_20	102236	A>G	GCCTCTCTAGATAAGACTCATATCTAGCCGAACTGCCGATCATGACTTTGTTTAGCCCGGTTCCTCTTTTAAAGTACACCCGGGGCCTTTTTTTCAAAAGGCGTTCTTTCGCGGTTAACTCCCACCGCCGCAGAACCATCCCACGACTGCTTGTAAGACGGCCAAGCCTATTAAAGCAACTCCTACTAGATTGCATACTCTCTCATAAAAGGATAGTTCTACCTTTATGTGAGGGA
Silene conica	3	cp	CACCGAAAACTACGCTCCATGACT	19-3	Silene_conica_mito_20	102236	A>G	AAACCCTTTTCGGAAGTAAGGTAAGTAGCGAATGGGTGCGTAAAGCGTAGTGATTTGCCAAAAGCGTCTTAGTAGGAGCGCGATAAACCAGAACAGCTAAAAACGCTGTGTCACGGGCGGGAGTTGAACCCGCCTCTCTAGATAAGACTCATATCTAGCCGAACTGCCGATCATGACTTTGTTTAGCCCGGTTCCTCTTTTAAAGTACACCCGGGGCCTTT
Silene conica	3	mt	ACAAGAAAAATAGACATGAATAGC[R2]	29-8	Silene_conica_mito_20	102236	A>G	TCATATCTAGCCGAACTGCCGATCATGACTTTGTTTAGCCCGGTTCCTCTTTTAAAGTACACCCGGGGCCTTTTTTTCAAAAGGCGTTCTTTCGCGGTTAACTCCCACCGCCGCAGAACCATCCCACGACTGC
Silene conica	3	mt	CCAATCAAAAAGTCAATATCGCAG[R1]	19-15	Silene_conica_mito_20	102236	A>G	AGTTGAACCCGCCTCTCTAGATAAGACTCATATCTAGCCGAACTGCCGATCATGACTTTGTTTAGCCCGGTTCCTCTTTTAAAGTACACCCGGGGCCTTTTTTTCAAAAGGCGTTCTTTCGCGGTTAACTCCC
Silene conica	3	mt	GAATGATAGCCGTACCAGCAAGAT	24-21	Silene_conica_mito_20	102236	A>G	GCCGATCATGACTTTGTTTAGCCCGGTTCCTCTTTTAAAGTACACCCGGGGCCTTTTTTTCAAAAGGCGTTCTTTCGCGGTTAACTCCCACCGCCGCAGAACCATCCCACGACTGCTTGTAAGACGGCCAAGCCTATTAAAGCAACTCCTACTAGATTGCATACTCTCTCATAAAAGGATAGTTCTACCTTTATGTGAGGG
Silene conica	3	mt	GGCTCAGAATCGTCCCGAGTGATG[R2]	11-10	Silene_conica_mito_20	102236	A>G	CGCCTCTCTAGATAAGACTCATATCTAGCCGAACTGCCGATCATGACTTTGTTTAGCCCGGTTCCTCTTTTAAAGTACACCCGGGGCCTTTTTTTCAAAAGGCGTTCTTTCGCGGTTAACTCCCACCGCCGCA
Silene conica	1	mt	ACCCTGGATAATGCGTCAGATGCC[R2]	26-16	Silene_conica_mito_21	14356	A>G	TGCTCGCCTGTCAAACCAGCAAGGCTACTTCCCCCCGATGTACCCCGTTAGATCGCAAAGATCTCGGCGCCTTGAGACAGTCCTGTCATATTAAGAAGAAAGTTTCTTAGGGCTGGCTTGCTTTATGGGCTAT
Silene conica	1	mt	ATCGCACAGAGCCCACCATACATA[R2]	15-12	Silene_conica_mito_21	14356	A>G	GAGACTTTACTATACCAAATGCTCGCCTGTCAAACCAGCAAGGCTACTTCCCCCCGATGTACCCCGTTAGATCGCAAAGATCTCGGCGCCTTGAGACAGTCCTGTCATATTAAGAAGAAAGTTTCTTAGGGCT
Silene conica	1	mt	ATGCTTGGATTACACTCTTACAAA	20-16	Silene_conica_mito_21	14356	A>G	CCCGCCCTTGTCTTATCTCTGGGTCCGAAAGAAAAGAGGCTTGCTTTATATATAGGGGGAGGCAAAGAGTGAGACTTTACTATACCAAATGCTCGCCTGTCAAACCAGCAAGGCTACTTCCCCCCGATGTACCCCGTTAGATCGCAAAGATCTCGGCGCCTTGAGACAGT
Silene conica	1	mt	CGCCGAACTTTATTGGCAGCCCTT[R1]	22-16	Silene_conica_mito_21	14356	A>G	CCAAATGCTCGCCTGTCAAACCAGCAAGGCTACTTCCCCCCGATGTACCCCGTTAGATCGCAAAGATCTCGGCGCCTTGAGACAGTCCTGTCATATTAAGAAGAAAGTTTCTTAGGGCTGGCTTGCTTTATGG
Silene conica	1	mt	GGCATCTGTGCCGTTGCAAAAATC[R2]	18-14	Silene_conica_mito_21	14356	A>G	GAAAGAAAAGAGGCTTGCTTTATATATAGGGGGAGGCAAAGAGTGAGACTTTACTATACCAAATGCTCGCCTGTCAAACCAGCAAGGCTACTTCCCCCCGATGTACCCCGTTAGATCGCAAAGATCTCGGCGC
Silene conica	1	mt	TAGTCGGAAAAGTCGTTATCCCAT	17-14	Silene_conica_mito_21	14356	A>G	CTTGTCTTATCTCTGGGTCCGAAAGAAAAGAGGCTTGCTTTATATATAGGGGGAGGCAAAGAGTGAGACTTTACTATACCAAATGCTCGCCTGTCAAACCAGCAAGGCTACTTCCCCCCGATGTACCCCGTTAGATCGCAAAGATCTCGGCGCCTTGAGACAGTC
Silene conica	1	mt	ACAATGTATCATCCGAGGAACCCA	12-9	Silene_conica_mito_21	14356	A>G	GGGGGAGGCAAAGAGTGAGACTTTACTATACCAAATGCTCGCCTGTCAAACCAGCAAGGCTACTTCCCCCCGATGTACCCCGTTAGATCGCAAAGATCTCGGCGCCTTGAGACAGTCCTGTCATATTAAGAAGAAAGTTTCTTAGGGCTGGCTTGCTTTATGGGCTATAGACCAAGTAAATGGCCATTGGTTTGAATGTTTTGACCTTTCTCGAATACG
Silene conica	3	cp	CAAGAAACTCGATTATCTATAGAT[R1]	14-10	Silene_conica_mito_21	14356	A>G	AGAAAAGAGGCTTGCTTTATATATAGGGGGAGGCAAAGAGTGAGACTTTACTATACCAAATGCTCGCCTGTCAAACCAGCAAGGCTACTTCCCCCCGATGTACCCCGTTAGATCGCAAAGATCTCGGCGCCTT
Silene conica	2	cp	CCCACAAGCTAATATTCCAGACAC	9-7	Silene_conica_mito_21	26126	A>G	CAGTCTATAACTATACTTGTAATTTGTAAGAATCTTTCTGGAGGACCTTTTAAAAAAGATGGTCAGTCTCTTTCTTATGCTTAGAACAATCTCACACATATCATTAAGATCTACTACTATAAAGAAAGGCTAAAGAAAAAAAGAAGCGTCTTAACTAACTATAGTAAGTCTTTCCAACCATGGAGAGT
Silene conica	3	cp	GGAAGTTTTGGTTCCCTGTAAGCG	7-7	Silene_conica_mito_21	26126	A>G	ATCTTTCTGGAGGACCTTTTAAAAAAGATGGTCAGTCTCTTTCTTATGCTTAGAACAATCTCACACATATCATTAAGATCTACTACTATAAAGAAAGGCTAAAGAAAAAAAGAAGCGTCTTAACTAACTATAGTAAGTCTTTCCAACCATGG
Silene conica	3	cp	CTTCCCGATCACGGGTCAAATGAA	8-3	Silene_conica_mito_21	27760	A>G	TAAGTCAAGCGATTGCCTAATGCTCAGATGAGAAAACTCCAATTAAATTTATTGGTGAAAGAAGCTCCAGTGGATGCTCTATCTTTAGCCTGCCCGCGTTCTTTATATTAAAACAGAGGACTTTCTTTATGATAAATGTACATTGTATATAATCACCATGCAACAGACCATTGCTAACACCTCTCTATCTGGCATGGCAGCACAGGCGCTCCTTTTACTTGC
Silene conica	3	cp	ATAAAACCTACGCGGCGAAATAGA	13-11	Silene_conica_mito_21	60560	A>C	AGAAAGGTCAAAAGACTTCAACAAAGGAAAGCTCTAAAAAAGTCAAAAAAGAGCGTGCGTCGGGATTCCACTCTTCTCATCTATCTATCTAACAGGGGCAGCATTCCTCTATCTCCTTATGAAAGACCGATCCCGCGATCCAAATTTTGCTCGTCTTTCTTCTCTTATTGTTTGGACATTCTCGTAGGCGAACTAGA
Silene conica	1	mt	GCAGTCTAAATCGTACTTTTTTGG	18-10	Silene_conica_mito_21	68332	A>G	GAGGGTGGTTTTCTTTTTTATATAATCTTCAAGCTTCTTCTTATTAGAATATATATGTAAAGTAGAGAAGAAAGCTTTATCTAAAGGGGATCCCCGTACATTTACTATCCTAGTTCAACCTGCTGTTCCCTAAACTTAGACTTTTAGAATATAGAGCTCGCTGGCGTGGCGCTGGCACGGGTGAATGGTGCCCGCTTTAGCAGCTTTTAGTCATTTAGAGTTAAGGGAAA
Silene conica	3	mt	AAGTGAACCCAACAATTTGTCAAG	16-12	Silene_conica_mito_21	88930	A>C	TGCGTTCATGATCCCTTGGATTCTTCCTTGCCATTGTAAGTCAGCTGAAGATGAAGTAGAAATAGAAGTAGAAGGTGGGTTGGGCACTTTTGCTCTAGAGTCGAATCCACCACCCACAAAGGCATGCGCAATATAGA
Silene conica	3	cp	GAATCGGCCCATTAAACAGACAGC	16-15	Silene_conica_mito_21	106139	A>G	TAACTCGAGAGAGTCCTCCCTTCTTCCTTATGGTTTTTCCCATTCCTTTTCTTTTTCTTCTTCGTACCACAAAAAAAGAGGGGGGGTCGAACCTTAGTGAGACAGGGGACTGCCAAGGATAGGAGAAGGTGAAGGCCCTAGGAAAAAGGATCGAACGTTA
Silene conica	3	cp	AGACAAGTGGGTGACTCACTAGTC	13-10	Silene_conica_mito_22	2912	A>G	AATGTAAAGACTGCAGAGGTGCCTTTCTTTTACCAAAGTAGTGTGAATTATTACGTTGTAAAGTGGACGCACTTATTAGACTCAGCAGACTCAGCCCTCCAGGCTTTAGGTTCAAACATCTTCCTTCTCCCCTAGAAAGCCCCCCCGCCTGAACTCCTCTTTCTCGAGGCAAAATCTTAAAGAAAGAAAAAGGCATTGGGAAAAGACATTAATTCTAC
Silene conica	3	cp	CATATCTACAAATATGTAACTACG[R1]	8-6	Silene_conica_mito_22	2912	A>G	TTTTACCAAAGTAGTGTGAATTATTACGTTGTAAAGTGGACGCACTTATTAGACTCAGCAGACTCAGCCCTCCAGGCTTTAGGTTCAAACATCTTCCTTCTCCCCTAGAAAGCCCCCCCGCCTGAACTCCTCT
Silene conica	3	cp	CCGAATGTCAGGCTAAACCTGCTT	21-15	Silene_conica_mito_22	2912	A>G	CTCAGCCCTCCAGGCTTTAGGTTCAAACATCTTCCTTCTCCCCTAGAAAGCCCCCCCGCCTGAACTCCTCTTTCTCGAGGCAAAATCTTAAAGAAAGAAAAAGGCATTGGGAAAAGACATTAATTCTACTGTTGAAATCATCAGATAGTAGTTAACATTTTAGACATTTCGACCACAAAAGAAAGAAAAGGGGCTCCTACTTTCGACCATTAAGAAGAACTACAT
Silene conica	3	cp	GCAAAATAGAATGTAAACAGGACC	10-8	Silene_conica_mito_22	2912	A>G	TAGGTTCAAACATCTTCCTTCTCCCCTAGAAAGCCCCCCCGCCTGAACTCCTCTTTCTCGAGGCAAAATCTTAAAGAAAGAAAAAGGCATTGGGAAAAGACATTAATTCTACTGTTGAAATCATCAGATAGTAGTTAACATTTTAGACATTTCGACCACAAAAGAAAGAAAAGGG
Silene conica	3	mt	AAGCACGAGAGTGACGTCAGAACT	26-11	Silene_conica_mito_22	2912	A>G	TTATTAGACTCAGCAGACTCAGCCCTCCAGGCTTTAGGTTCAAACATCTTCCTTCTCCCCTAGAAAGCCCCCCCGCCTGAACTCCTCTTTCTCGAGGCAAAATCTTAAAGAAAGAAAAAGGCATTGGGAAAAGACATTAATTCTACTGTTGAAATCATCAGATAGTAGTTAACATTTTAGACATTTCG
Silene conica	3	mt	AATGTTCACAAACTGCCATTTAAG[R1]	17-11	Silene_conica_mito_22	2912	A>G	ACGTTGTAAAGTGGACGCACTTATTAGACTCAGCAGACTCAGCCCTCCAGGCTTTAGGTTCAAACATCTTCCTTCTCCCCTAGAAAGCCCCCCCGCCTGAACTCCTCTTTCTCGAGGCAAAATCTTAAAGAAA
Silene conica	3	mt	AGAACAATTTGATATCGGCAGACC[R1]	32-13	Silene_conica_mito_22	2912	A>G	CCAGGCTTTAGGTTCAAACATCTTCCTTCTCCCCTAGAAAGCCCCCCCGCCTGAACTCCTCTTTCTCGAGGCAAAATCTTAAAGAAAGAAAAAGGCATTGGGAAAAGACATTAATTCTACTGTTGAAATCATC
Silene conica	3	mt	CTGCACATTCACTAAAATCATGAT	28-26	Silene_conica_mito_22	2912	A>G	TGTAAAGACTGCAGAGGTGCCTTTCTTTTACCAAAGTAGTGTGAATTATTACGTTGTAAAGTGGACGCACTTATTAGACTCAGCAGACTCAGCCCTCCAGGCTTTAGGTTCAAACATCTTCCTTCTCCCCTAGAAAGCCCCCCCGCCTGAACTCCTCTTTCTCGAGGCAAAATCTTAAAGAAAGAAAAAGGCATTGGG
Silene conica	3	mt	ATGCTCGCCCCACTAAAGAGGAAA[R1]	18-17	Silene_conica_mito_22	2912	A>G	CCCCTAGAAAGCCCCCCCGCCTGAACTCCTCTTTCTCGAGGCAAAATCTTAAAGAAAGAAAAAGGCATTGGGAAAAGACATTAATTCTACTGTTGAAATCATCAGATAGTAGTTAACATTTTAGACATTTCGA
Silene conica	1	mt	CCTCTCCAACACTAAACATGTCCA	7-6	Silene_conica_mito_22	34585	A>G	CCTCCAGGCTTATCCTCCTTGTCAGTCAACCCCACTTCTCCCTCGTATGTAGCTATCTCATCCCAGTTGTGGTTGGTGGTCTGCTATCTGAAGAATAGCCTGGCTGTGACTCGACAAGTCTTCCCTCCCCCCTGAGTCTTAGGTGGTAATAAGCTCTTTCTTTTTACTATGCTCGGATCCCCAGTCGTCTGGTATAGATCGATACAAGCCCTCTTTCT
Silene conica	3	cp	AAAATATACCCACCGCGAAAATGG	7-3	Silene_conica_mito_22	34585	A>G	TGTGGTTGGTGGTCTGCTATCTGAAGAATAGCCTGGCTGTGACTCGACAAGTCTTCCCTCCCCCCTGAGTCTTAGGTGGTAATAAGCTCTTTCTTTTTACTATGCTCGGATCCCCAGTCGTCTGGTATAGATCGATACAAGCCCTCTTTCTTAAGTTTTCGGTACTAAGAAAAGTCTAATTAGATTTCAACTACTATAGGCCTCA
Silene conica	3	cp	AAATAAACCAACGTAAAACCTCCT	18-10	Silene_conica_mito_22	34585	A>G	CTTCTTAGCGGGCGCTCCCATAGGGAAAGCTCCTTCATAGTTGAGTATGAGCTATAAATCTCCTCCAGGCTTATCCTCCTTGTCAGTCAACCCCACTTCTCCCTCGTATGTAGCTATCTCATCCCAGTTGTGGTTGGTGGTCTGCTATCTGAAGAATAGCCTGGCTGTGACTCGACAAGTCTTCCCTCCCCCCTGAGTCTTAGGTGGTAA
Silene conica	3	cp	AAATAGCCAACATTAATTTTCCCA[R2]	10-7	Silene_conica_mito_22	34585	A>G	TCCCTCGTATGTAGCTATCTCATCCCAGTTGTGGTTGGTGGTCTGCTATCTGAAGAATAGCCTGGCTGTGACTCGACAAGTCTTCCCTCCCCCCTGAGTCTTAGGTGGTAATAAGCTCTTTCTTTTTACTATG
Silene conica	3	mt	ATTTTCATCTAGGAGACACGAATT[R1]	26-16	Silene_conica_mito_22	34585	A>G	CTTGTCAGTCAACCCCACTTCTCCCTCGTATGTAGCTATCTCATCCCAGTTGTGGTTGGTGGTCTGCTATCTGAAGAATAGCCTGGCTGTGACTCGACAAGTCTTCCCTCCCCCCTGAGTCTTAGGTGGTAAT
Silene conica	3	mt	GGTGTAAGTATCTCTCTGCCCCAA	19-7	Silene_conica_mito_22	34585	A>G	TAGCTATCTCATCCCAGTTGTGGTTGGTGGTCTGCTATCTGAAGAATAGCCTGGCTGTGACTCGACAAGTCTTCCCTCCCCCCTGAGTCTTAGGTGGTAATAAGCTCTTTCTTTTTACTATGCTCGGATCCCCAGTCGTCTGGTATA
Silene conica	3	cp	CGGCCGGCACTTTAACTCCGAGAA[R1]	17-13	Silene_conica_mito_22	68636	A>G	TATTCAAAGAACGTCTTATTCAAGCTCTGGTGCGGGCGGTGGACTCTACCGCCAAGGGCAGGGACCGAAGTGGTACTCGATTGTTAGTGAGAGGACCCGGAGGGGGGGGCGAGACTAGAAGGAGAAGGCTCGT
Silene conica	1	cp	AAAGATTCAGCTATATCCGAAGCA[R1]	35-25	Silene_conica_mito_22	75297	A>C	CCTGCTCGTCAACGTCCTACTCTAAGGAAAAAGCCACCGTGGACCTATAAGAGTCCTAAGAGCATTCCCTTGTCTATTAAGTATTAAGCTCTTTTTACTTGGTTGTACAATCTTTCCTTACTATACAATTCTC
Silene conica	1	mt	AGGCTATAAATACCTATAGACCCG[R2]	16-14	Silene_conica_mito_22	75297	A>C	AAGAGTAGCTTCAGTTAGAGCTCTTTGATAAACCTGCTCGTCAACGTCCTACTCTAAGGAAAAAGCCACCGTGGACCTATAAGAGTCCTAAGAGCATTCCCTTGTCTATTAAGTATTAAGCTCTTTTTACTTG
Silene conica	1	mt	CACCGATGCAGCGAGGAAGCAAGG	11-10	Silene_conica_mito_22	75297	A>C	AGCATATATAAATACAATTGCAAGAGTAGCTTCAGTTAGAGCTCTTTGATAAACCTGCTCGTCAACGTCCTACTCTAAGGAAAAAGCCACCGTGGACCTATAAGAGTCCTAAGAGCATTCCCTTGTCTATTAAGTATTAAGCTCTTTTTACTTGGTTGTACAATCTTT
Silene conica	1	mt	CGGATTCAATAGTTCCCTGCCAGG	11-10	Silene_conica_mito_22	75297	A>C	CGTCAACGTCCTACTCTAAGGAAAAAGCCACCGTGGACCTATAAGAGTCCTAAGAGCATTCCCTTGTCTATTAAGTATTAAGCTCTTTTTACTTGGTTGTACAATCTTTCCTTACTATACAATTCTCGTATTCTTCTCTATGATATTAAAAGAACATCCAACTTGGAGTTTAACTCACACTATTTGTTGGCGGCAAAAGACAG
Silene conica	1	mt	GACTTGGACCGCTTGCCTTAGTCA	30-19	Silene_conica_mito_22	75297	A>C	CTGGAGCGTTCTCCCACGCAAGTCTAGGGATTTTTTATCTCTCGCCCCCTTTCGGATACATCAGGCAAGGCCTATAAAGCATATATAAATACAATTGCAAGAGTAGCTTCAGTTAGAGCTCTTTGATAAACCTGCTCGTCAACGTCCTACTCTAAGGAAAAAGCCACCGTGGACCTATAAGAGTCCTAAGAGCATTCCCTTGTCTATTAAGTATTAAGCTCTTTT
Silene conica	1	mt	GCCCAAATGTTATCTGGAACCGGG	17-10	Silene_conica_mito_22	75297	A>C	CTCGTCAACGTCCTACTCTAAGGAAAAAGCCACCGTGGACCTATAAGAGTCCTAAGAGCATTCCCTTGTCTATTAAGTATTAAGCTCTTTTTACTTGGTTGTACAATCTTTCCTTACTATACAATTCTCGTATTCTTCTCTATGATATTAAAAGAACATCCAACTTGGA
Silene conica	1	mt	ATATGGAAAGATCGCTGCAGTTTG[R2]	26-5	Silene_conica_mito_22	75297	A>C	GGCCTATAAAGCATATATAAATACAATTGCAAGAGTAGCTTCAGTTAGAGCTCTTTGATAAACCTGCTCGTCAACGTCCTACTCTAAGGAAAAAGCCACCGTGGACCTATAAGAGTCCTAAGAGCATTCCCTT
Silene conica	1	mt	ATTCAGTGAAAATAATTTTCAGGA[R1]	21-19	Silene_conica_mito_22	75297	A>C	CTCTTTGATAAACCTGCTCGTCAACGTCCTACTCTAAGGAAAAAGCCACCGTGGACCTATAAGAGTCCTAAGAGCATTCCCTTGTCTATTAAGTATTAAGCTCTTTTTACTTGGTTGTACAATCTTTCCTTAC
Silene conica	1	mt	CACAAATACTCTTAAATGAAGCAT[R2]	29-7	Silene_conica_mito_22	75297	A>C	CTCGTCAACGTCCTACTCTAAGGAAAAAGCCACCGTGGACCTATAAGAGTCCTAAGAGCATTCCCTTGTCTATTAAGTATTAAGCTCTTTTTACTTGGTTGTACAATCTTTCCTTACTATACAATTCTCGTAT
Silene conica	2	cp	AACCCAACCGCTGAAGACTGCCGA	8-4	Silene_conica_mito_22	75297	A>C	GCTTCAGTTAGAGCTCTTTGATAAACCTGCTCGTCAACGTCCTACTCTAAGGAAAAAGCCACCGTGGACCTATAAGAGTCCTAAGAGCATTCCCTTGTCTATTAAGTATTAAGCTCTTTTTACTTGGTTGTACAATCTTTCCTTACTATACAATTCTCGTATTCTTCTCTATGATATTAAAAGAACATCC
Silene conica	2	cp	GATCATACACCTTTGCCGACACCT[R2]	15-9	Silene_conica_mito_22	75297	A>C	CTATAAAGCATATATAAATACAATTGCAAGAGTAGCTTCAGTTAGAGCTCTTTGATAAACCTGCTCGTCAACGTCCTACTCTAAGGAAAAAGCCACCGTGGACCTATAAGAGTCCTAAGAGCATTCCCTTGTC
Silene conica	2	cp	ACGCGACCCCACGCCGAACTCCGA[R2]	28-10	Silene_conica_mito_22	75297	A>C	TCGGATACATCAGGCAAGGCCTATAAAGCATATATAAATACAATTGCAAGAGTAGCTTCAGTTAGAGCTCTTTGATAAACCTGCTCGTCAACGTCCTACTCTAAGGAAAAAGCCACCGTGGACCTATAAGAGT
Silene conica	2	cp	CCTTCCATTGTCTAACTTCCAAAC	16-12	Silene_conica_mito_22	75297	A>C	AGAGCTCTTTGATAAACCTGCTCGTCAACGTCCTACTCTAAGGAAAAAGCCACCGTGGACCTATAAGAGTCCTAAGAGCATTCCCTTGTCTATTAAGTATTAAGCTCTTTTTACTTGGTTGTACAATCTTTCCTTACTATACAATTCTCGTATTCTTCTCTATGATATTAAAAGAACATCCAACTTGGAGTTTAACTCACACTATTTG
Silene conica	2	cp	CTAGCGGGCCTTGCGGCGTATCTA[R1]	10-7	Silene_conica_mito_22	75297	A>C	CGTCCTACTCTAAGGAAAAAGCCACCGTGGACCTATAAGAGTCCTAAGAGCATTCCCTTGTCTATTAAGTATTAAGCTCTTTTTACTTGGTTGTACAATCTTTCCTTACTATACAATTCTCGTATTCTTCTCT
Silene conica	2	cp	GCCTGGGACACTGGCTATAACATT[R2]	13-8	Silene_conica_mito_22	75297	A>C	AGAGCTCTTTGATAAACCTGCTCGTCAACGTCCTACTCTAAGGAAAAAGCCACCGTGGACCTATAAGAGTCCTAAGAGCATTCCCTTGTCTATTAAGTATTAAGCTCTTTTTACTTGGTTGTACAATCTTTCC
Silene conica	2	cp	GTCATCCCCAACTAAGTTCTATAG[R2]	12-8	Silene_conica_mito_22	75297	A>C	CAAGGCCTATAAAGCATATATAAATACAATTGCAAGAGTAGCTTCAGTTAGAGCTCTTTGATAAACCTGCTCGTCAACGTCCTACTCTAAGGAAAAAGCCACCGTGGACCTATAAGAGTCCTAAGAGCATTCC
Silene conica	2	cp	GCACGCAACATTTTATTCGCCGCA[R2]	18-13	Silene_conica_mito_22	75297	A>C	CCTTTCGGATACATCAGGCAAGGCCTATAAAGCATATATAAATACAATTGCAAGAGTAGCTTCAGTTAGAGCTCTTTGATAAACCTGCTCGTCAACGTCCTACTCTAAGGAAAAAGCCACCGTGGACCTATAA
Silene conica	3	cp	CCCAGGGTAGTCGACCCTCTCCCC	13-11	Silene_conica_mito_22	75297	A>C	TAGAGCTCTTTGATAAACCTGCTCGTCAACGTCCTACTCTAAGGAAAAAGCCACCGTGGACCTATAAGAGTCCTAAGAGCATTCCCTTGTCTATTAAGTATTAAGCTCTTTTTACTTGGTTGTACAATCTTTCCTTACTATACAATTCTCGTATTCT
Silene conica	3	cp	CGCCGTAGCTCAGGTGTGCATGAG	10-5	Silene_conica_mito_22	75297	A>C	AGCATATATAAATACAATTGCAAGAGTAGCTTCAGTTAGAGCTCTTTGATAAACCTGCTCGTCAACGTCCTACTCTAAGGAAAAAGCCACCGTGGACCTATAAGAGTCCTAAGAGCATTCCCTTGTCTATTAAGTATTAAGCTCTTTTTACTTGGTTGTACAATCTTTCCTTACTATACAATTCTCGTATTCTTCTCTATGATATTAAAAGAACATCCAAC
Silene conica	3	mt	AAATCCCTGAAACGCGAATAAAAA[R2]	20-18	Silene_conica_mito_22	75297	A>C	CATCAGGCAAGGCCTATAAAGCATATATAAATACAATTGCAAGAGTAGCTTCAGTTAGAGCTCTTTGATAAACCTGCTCGTCAACGTCCTACTCTAAGGAAAAAGCCACCGTGGACCTATAAGAGTCCTA
Silene conica	3	mt	AACAAAGTACCCAACAACACACCA	30-23	Silene_conica_mito_22	75297	A>C	CAAGTCTAGGGATTTTTTATCTCTCGCCCCCTTTCGGATACATCAGGCAAGGCCTATAAAGCATATATAAATACAATTGCAAGAGTAGCTTCAGTTAGAGCTCTTTGATAAACCTGCTCGTCAACGTCCTACTCTAAGGAAAAAGCCACCGTGGACCTATAAGAGTCCTAAGAGCATTCCCTTGTCTATTAAGTATTAAGCT
Silene conica	3	mt	AGATTCCGGCGCGCATTGCCTCCG[R2]	14-9	Silene_conica_mito_22	75297	A>C	CAAGGCCTATAAAGCATATATAAATACAATTGCAAGAGTAGCTTCAGTTAGAGCTCTTTGATAAACCTGCTCGTCAACGTCCTACTCTAAGGAAAAAGCCACCGTGGACCTATAAGAGTCCTAAGAGCATTCC
Silene conica	3	mt	AGTCTAATCGAAATCCAGCTCACG[R2]	20-3	Silene_conica_mito_22	75297	A>C	CAGTTAGAGCTCTTTGATAAACCTGCTCGTCAACGTCCTACTCTAAGGAAAAAGCCACCGTGGACCTATAAGAGTCCTAAGAGCATTCCCTTGTCTATTAAGTATTAAGCTCTTTTTACTTGGTTGTACAATC
Silene conica	1	cp	GAAGCTCCCTAGGGAAAAGGAACA[R2]	27-18	Silene_conica_mito_23	5787	A>G	GCGAGGTATTACAGTTGAACGAACTTCTTTTTCCTGCTCATCTGTCCGAGCAAAGCGAGTGAATGCGCTAGGAGAAAGAGACCCGGCTGCAAAGAAGAAGGGCGAAGCTACTCGCATAGAAAAGAAGACAAAG
Silene conica	2	cp	ACGTTGTAAAGAGTAGATTGAAGG[R2]	16-7	Silene_conica_mito_23	58315	A>T	CTAGTTCATAGCAATTCACTAGCCTTTGAGCGAGTGTGGTGTCTAAGATTCCGTGTGCTTTTCTCGAAGTTCCTCTTCTTTATTCATTCTTTTCTTAGGTACGTCTATCCTCGCCCGAGACTTTAAAAAGGAC
Silene conica	1	cp	AAGCCTCAATAGTACAATATTTTT[R1]	29-29	Silene_conica_mito_24	6245	A>G	GCGGATCTTTATCCTGTTTCAGAAGGGGAGGGCCCCGCGGCTAAGCCAAGGTTCTTTCATGCAATTTAAATCTAGTCTTTAAATTTTTAAGTAAAGGAGCTATCTCGCTATGAGCATTATACTGATGAAGTCA
Silene conica	1	cp	ACAAACGCCCTAGACAATTTACAC[R1]	18-13	Silene_conica_mito_24	6245	A>G	CCTTCCAGTCCCGTAAAAGGGAGGGGTGATCTTACATCCTTTTATAAACCTGGCGGATCTTTATCCTGTTTCAGAAGGGGAGGGCCCCGCGGCTAAGCCAAGGTTCTTTCATGCAATTTAAATCTAGTCTTTA
Silene conica	1	cp	AATACGTGAGAGGCTTCCGAGCAC[R1]	25-16	Silene_conica_mito_24	6245	A>G	GCCAAGGAGTCAAGCGAGTTCTTATGTGTGCAGTCTACCCTTCCAGTCCCGTAAAAGGGAGGGGTGATCTTACATCCTTTTATAAACCTGGCGGATCTTTATCCTGTTTCAGAAGGGGAGGGCCCCGCGGCTA
Silene conica	1	cp	CGGTAAGGTCAAGCCGATAGCGAA[R2]	31-20	Silene_conica_mito_24	6245	A>G	CCAAGGAGTCAAGCGAGTTCTTATGTGTGCAGTCTACCCTTCCAGTCCCGTAAAAGGGAGGGGTGATCTTACATCCTTTTATAAACCTGGCGGATCTTTATCCTGTTTCAGAAGGGGAGGGCCCCGCGGCTAA
Silene conica	1	mt	ATAACTGCTATCCTGTCAACAAGG	22-10	Silene_conica_mito_24	6245	A>G	AGGGAGGGGTGATCTTACATCCTTTTATAAACCTGGCGGATCTTTATCCTGTTTCAGAAGGGGAGGGCCCCGCGGCTAAGCCAAGGTTCTTTCATGCAATTTAAATCTAGTCTTTAAATTTTTAAGTAAAGGAGCTATCTCGCTATGAGCATTATACTGATGAAGTCAAGTACTCTGCCTTGTCTTCGGCGGATATGAATCT
Silene conica	1	mt	ATAATTTCTAACATATACACACAC[R1]	15-11	Silene_conica_mito_24	6245	A>G	CAAGCGAGTTCTTATGTGTGCAGTCTACCCTTCCAGTCCCGTAAAAGGGAGGGGTGATCTTACATCCTTTTATAAACCTGGCGGATCTTTATCCTGTTTCAGAAGGGGAGGGCCCCGCGGCTAAGCCAAGGTT
Silene conica	2	cp	AGGCTTCCAAGCTAGAAGATTGTA[R2]	14-9	Silene_conica_mito_24	6245	A>G	CCGTAAAAGGGAGGGGTGATCTTACATCCTTTTATAAACCTGGCGGATCTTTATCCTGTTTCAGAAGGGGAGGGCCCCGCGGCTAAGCCAAGGTTCTTTCATGCAATTTAAATCTAGTCTTTAAATTTTTAAG
Silene conica	2	cp	AGTACGTGGTATATTCAACGCGTG	13-7	Silene_conica_mito_24	6245	A>G	GATCTTACATCCTTTTATAAACCTGGCGGATCTTTATCCTGTTTCAGAAGGGGAGGGCCCCGCGGCTAAGCCAAGGTTCTTTCATGCAATTTAAATCTAGTCTTTAAATTTTTAAGTAAAGGAGCTATCTCGCTATGAGCATTATACTGATGAAGTCAAGTACTCTGCCTTGTCTTCGGCGGATATGAATCTCTGCCATAAAGGTGGTTCGGGTCGAA
Silene conica	2	cp	GTCAATTTAAAGGTCCAAGATATA	14-7	Silene_conica_mito_24	6245	A>G	AGGAGTCAAGCGAGTTCTTATGTGTGCAGTCTACCCTTCCAGTCCCGTAAAAGGGAGGGGTGATCTTACATCCTTTTATAAACCTGGCGGATCTTTATCCTGTTTCAGAAGGGGAGGGCCCCGCGGCTAAGCCAAGGTTCTTTCATGCAATT
Silene conica	3	cp	ATCGAATAGAATCTGTTACACAAC	5-4	Silene_conica_mito_24	6245	A>G	CAGTCTACCCTTCCAGTCCCGTAAAAGGGAGGGGTGATCTTACATCCTTTTATAAACCTGGCGGATCTTTATCCTGTTTCAGAAGGGGAGGGCCCCGCGGCTAAGCCAAGGTTCTTTCA
Silene conica	3	mt	CAAAAACAGGACTAACAAGCTGAA	20-18	Silene_conica_mito_24	6245	A>G	TCAGAAGGGGAGGGCCCCGCGGCTAAGCCAAGGTTCTTTCATGCAATTTAAATCTAGTCTTTAAATTTTTAAGTAAAGGAGCTATCTCGCTATGAGCATTATACTGATGAAGTCAAGTACTCTGCCTTGTCTTCGGCGGATATGAATCTCTGCCATAAAGGTGGTTCGGGTCGAAACTCCGTTGCCGCGCCTT
Silene conica	3	mt	AAGCACGGATTAAGAGTTAACGAA	27-20	Silene_conica_mito_24	6245	A>G	CCTGTTTCAGAAGGGGAGGGCCCCGCGGCTAAGCCAAGGTTCTTTCATGCAATTTAAATCTAGTCTTTAAATTTTTAAGTAAAGGAGCTATCTCGCTATGAGCATTATACTGATGAAGTCAAGTACTCTGCCTTGTCTTCGGCGGATATGAATCTCT
Silene conica	3	mt	ACAGGCATACGTGGCGCACCCTTA[R1]	18-18	Silene_conica_mito_24	6245	A>G	CCTGTTTCAGAAGGGGAGGGCCCCGCGGCTAAGCCAAGGTTCTTTCATGCAATTTAAATCTAGTCTTTAAATTTTTAAGTAAAGGAGCTATCTCGCTATGAGCATTATACTGATGAAGTCAAGTACTCTGCCT
Silene conica	3	mt	ATCCGGCGTAAACTATTAGAGAAG[R1]	25-19	Silene_conica_mito_24	6245	A>G	GTAAAAGGGAGGGGTGATCTTACATCCTTTTATAAACCTGGCGGATCTTTATCCTGTTTCAGAAGGGGAGGGCCCCGCGGCTAAGCCAAGGTTCTTTCATGCAATTTAAATCTAGTCTTTAAATTTTTAAGTA
Silene conica	3	mt	AATAGTGCAGTAGTCCATTGGCAA	23-17	Silene_conica_mito_24	6245	A>G	TACATCCTTTTATAAACCTGGCGGATCTTTATCCTGTTTCAGAAGGGGAGGGCCCCGCGGCTAAGCCAAGGTTCTTTCATGCAATTTAAATCTAGTCTTTAAATTTTTAAGTAAAGGAGCTATCTCGCTATGAGCATTATACTGATGAAGTCAAGTACTCTGCCTTGTCTTCGGCGGATATGAATCTCTGCCATAAAGGTGGTTCGGGTCGAAACTCCGTTGCC
Silene conica	3	mt	CGTTATAAAATTGTCTTAATTGTT[R2]	20-17	Silene_conica_mito_24	6245	A>G	AGTCAAGCGAGTTCTTATGTGTGCAGTCTACCCTTCCAGTCCCGTAAAAGGGAGGGGTGATCTTACATCCTTTTATAAACCTGGCGGATCTTTATCCTGTTTCAGAAGGGGAGGGCCCCGCGGCTAAGCCAAG
Silene conica	3	cp	CTATTGTGAAACTAGGCATGCTCA[R1]	15-15	Silene_conica_mito_24	9673	C>A	CAAGATCTTAATTAAAGATGGGATGGGCTTATGTCCCTTCTTTTATTAATGAAAGAATCTTTGTTGGGACCAAGAGCTCTTGTCACACACACCGCTTTAGCTGAGAAAAAAAGATCTGACTTGATATGAGTCC
Silene conica	1	mt	AACAGCCCAGCCGGAGCAAGTTGG[R1]	27-16	Silene_conica_mito_24	20125	A>G	ACCGAGCGACTACTCTATGCTTGTAACGTATAATATAAAAGAAAGAAGACTTTCCCCCAAAAGGGCGCCATAGCTTTTGTTGTAACTTGCCCCCTCCTACATATGTCGTCTATAGCAGCCTCTTCTCTTTCTT
Silene conica	1	mt	CACTTTGCCCTCGCATGCGCAAAG[R2]	11-8	Silene_conica_mito_24	20125	A>G	TGCAGCTAACCGAGCGACTACTCTATGCTTGTAACGTATAATATAAAAGAAAGAAGACTTTCCCCCAAAAGGGCGCCATAGCTTTTGTTGTAACTTGCCCCCTCCTACATATGTCGTCTATAGCAGCCTCTTC
Silene conica	1	cp	AAACAACGATATATGCTCGCCTAC[R1]	27-21	Silene_conica_mito_24	95776	A>G	TTTCTTCTTTACCACTAGATCCTTTTTAGACGACTTACTCGGGATCCCCCATTGACTCTTGACTTACAAAGCGCCTTCCTCTTATATAGAGTTTTTGCTAAATTAAGAAAGCTTTGTTGGGATCGCCAGACCT
Silene conica	1	cp	CTACAATCCCATTTATAATATCGA	26-15	Silene_conica_mito_24	95776	A>G	CTTATCTCCATTTAGTTAGTACTACATTATATTGGCAATCAAATAAACGTGTTTCTTGGCTGCATGCCTCACAATTTCTTCTTTACCACTAGATCCTTTTTAGACGACTTACTCGGGATCCCCCATTGACTCTTGACTTACAAAGCGCCTTCCTCTTATATAGAGTTTTTGCTAAATTAAGAAAGCTTTGTTGGGATCGCCAGACCT
Silene conica	1	cp	ATATTCTAAGATGGATACCAGCAT	26-20	Silene_conica_mito_24	95776	A>G	TAGATCCTTTTTAGACGACTTACTCGGGATCCCCCATTGACTCTTGACTTACAAAGCGCCTTCCTCTTATATAGAGTTTTTGCTAAATTAAGAAAGCTTTGTTGGGATCGCCAGACCTAGAT
Silene conica	1	mt	AAAGTAGGTTTAGAAACTTGAAGA	14-4	Silene_conica_mito_24	95776	A>G	CATTTAGTTAGTACTACATTATATTGGCAATCAAATAAACGTGTTTCTTGGCTGCATGCCTCACAATTTCTTCTTTACCACTAGATCCTTTTTAGACGACTTACTCGGGATCCCCCATTGACTCTTGACTTACAAAGCG
Silene conica	3	cp	CAGCGCCAAGTGCGCTGAAGGCTT[R1]	14-14	Silene_conica_mito_24	95776	A>G	AATCAAATAAACGTGTTTCTTGGCTGCATGCCTCACAATTTCTTCTTTACCACTAGATCCTTTTTAGACGACTTACTCGGGATCCCCCATTGACTCTTGACTTACAAAGCGCCTTCCTCTTATATAGAGTTTT
Silene conica	3	mt	GTAACACAAATGTAATCCACAGAA[R1]	16-9	Silene_conica_mito_24	95776	A>G	TTCTTCTTTACCACTAGATCCTTTTTAGACGACTTACTCGGGATCCCCCATTGACTCTTGACTTACAAAGCGCCTTCCTCTTATATAGAGTTTTTGCTAAATTAAGAAAGCTTTGTTGGGATCGCCAGACCTA
Silene conica	3	cp	TACGAACAAAAATGCCACGCTCAA	15-7	Silene_conica_mito_24	98272	A>G	AAGGTGTGCCCTTAGAATAGAAAGGCGTTAAATACTTCTTTGTTTAATCAGATCTACGCCGTCGTGGAAGCAAAGGAAGCAAGCCCCATGCTCTCAAGGCTGAACCTTAATTGTCCGGCAAGTCATCCCGGGTAGATAGAGCGCGTATTCGAAGGATCTTTTCTTCTTTTTTTATGAGTTTATGCTCTTTCCCTT
Silene conica	3	mt	ATCCAACGAACTTTCACACGCTTA[R2]	29-15	Silene_conica_mito_25	2392	C>A	GTTTGTGATAGGTATAAAGTGCTTGTCTGTAAAAGTGGAAAAATGATCGACTAACAGGGTAGGGTGGGTCTAACTTGTATCCAAAAATTAAATAGCCGGGAGAAAAGTTTCACAAGAAAGTCCCATTCCTTAG
Silene conica	1	cp	AAGGACCTTCATTCACTGCCTAAC[R2]	28-23	Silene_conica_mito_25	16511	A>G	TTATGAATCAACTTGTCGCACATATTTAAAGAAGAAGCGGTCCCTTTCATAGCAAGTGAGCTGATGGAGGTGTCTTTCTGCTTGAATAGGGCGAATTCACGGGGAACTTTCGTAACTAGAAAATTGATTAGGA
Silene conica	3	mt	GATATGGATATAGTGCTATCCTAA[R1]	20-12	Silene_conica_mito_25	24908	C>A	AAGCTATTTAAACCTCTCTTTTCATACGACCTTGAGAATTATAGTGGGAAATCGCGCGGCACACAAATTCTATCTGCATGTCGAAAATATAAAGATCTCTGTCTTTTTAAATCTATAGGAGAATTTGAAGAGT
Silene conica	3	cp	GCCACGAGTCCAGCGATTAATCTG	7-3	Silene_conica_mito_25	32518	A>G	CGAATAAATGCGAAAGAGGCTTAGCCATAAGTTCTTTCTCTTTCCTCCACTATAATTCTTTTAATAGAAACTGAGATTAAAGGGATGAGTACAATTCTAAGCGACGCCGTCGGGAACTTCGCTTAGAGGACTCCATTCTGTTCTAACTTGCCTGTGGCCGAAACTCAGTTTTT
Silene conica	3	mt	AACAGCCAAATTGTGGGTCCACAA	37-20	Silene_conica_mito_25	32518	A>G	AGAGACTTCTTTATATATAAGAAAAGAGAAGAAGAAAACACAGGCATTAGTATCTCGAATAAATGCGAAAGAGGCTTAGCCATAAGTTCTTTCTCTTTCCTCCACTATAATTCTTTTAATAGAAACTGAGATTAAAGGGATGAGTACAA
Silene conica	3	cp	ACCCTCATCAGCCCCACGACCCCT[R1]	24-13	Silene_conica_mito_25	34190	A>G	CACGAAACCTGTTAACAAAGTAAAAGGAATTGCTCGTGGAAGCCTTGTCCTCTCTGAGAAAGACCCGAAATCTTCAGTGGACTCTTTTCTGGCAAAAGCTTGCCTTTTTGCGTATTGAGTAGCCCATAAGTTG
Silene conica	1	cp	TCACGCTCAAAGTTCAGGTTGTCT[R2]	31-27	Silene_conica_mito_25	49420	A>G	AAGACAAGTACAGGACCCCCCAACCTCAGTGCGGAAATGTCATCAGCGGCTCTTTCTACATAGAAGAACTCCGCCCGATGCCCCATCAAGTGTCAAGTCTCAATCAAACCTTCCAGCAAGGTTTCAAGGGGCT
Silene conica	1	cp	CACGCGTAGAGGTCTCCCCAGTCC	26-24	Silene_conica_mito_25	49420	A>G	AGCCTCTCTTCCTTCTTATCCTTTCACTACGCTCGAGCCTCTTTTCATTCCACTTGTTTAGCCAATGCCCCCTTTTCTTGCAAAGACAAGTACAGGACCCCCCAACCTCAGTGCGGAAATGTCATCAGCGGCTCTTTCTACATAGAAGAACTCCGCCCGATGCCCCATCAAGTGTCAAGTCTCAATCAAACCTTCCAGCAAGGTTTCAAGGGGCTTGCTCCAT
Silene conica	1	mt	ATATCGCACCAACACCACTAGGAC[R2]	23-19	Silene_conica_mito_25	49420	A>G	TAGCCAATGCCCCCTTTTCTTGCAAAGACAAGTACAGGACCCCCCAACCTCAGTGCGGAAATGTCATCAGCGGCTCTTTCTACATAGAAGAACTCCGCCCGATGCCCCATCAAGTGTCAAGTCTCAATCAAAC
Silene conica	1	mt	ATATTCACCAAACCTAAGACAATG	18-10	Silene_conica_mito_25	49420	A>G	CGAGCCTCTTTTCATTCCACTTGTTTAGCCAATGCCCCCTTTTCTTGCAAAGACAAGTACAGGACCCCCCAACCTCAGTGCGGAAATGTCATCAGCGGCTCTTTCTACATAGAAGAACTCCGCCCGATGCCCCATCAAGTGTCAAGTCTCAATCAAAC
Silene conica	1	mt	AACCTACGCAATTCGTATACGTTA[R2]	28-17	Silene_conica_mito_25	49420	A>G	CATTCCACTTGTTTAGCCAATGCCCCCTTTTCTTGCAAAGACAAGTACAGGACCCCCCAACCTCAGTGCGGAAATGTCATCAGCGGCTCTTTCTACATAGAAGAACTCCGCCCGATGCCCCATCAAGTGTCAA
Silene conica	1	mt	AATGGCTTACGCCTGTTCAGTCTC	22-17	Silene_conica_mito_25	49420	A>G	CCTTTTCTTGCAAAGACAAGTACAGGACCCCCCAACCTCAGTGCGGAAATGTCATCAGCGGCTCTTTCTACATAGAAGAACTCCGCCCGATGCCCCATCAAGTGTCAAGTCTCAATCAAACCTTCCAGCAAGGTTTCAAGGGGCTTGCTCCATCTACCTACTTTG
Silene conica	1	mt	AGGTCAGGCGTTCCTCAACGAACT	25-9	Silene_conica_mito_25	49420	A>G	CCAATGCCCCCTTTTCTTGCAAAGACAAGTACAGGACCCCCCAACCTCAGTGCGGAAATGTCATCAGCGGCTCTTTCTACATAGAAGAACTCCGCCCGATGCCCCATCAAGTGTCAAGTCTCAATCAAACCTTCCAGCAAGGTTTCAAGGGGCTTGCTCCATCTACCTACTTTGCTTTCTTGACTTGCTTCTTTAGTATTTAAAGGGCTTCTCTTCTTAAAAACAA
Silene conica	1	mt	GTTGTTCCGCATTAACAAATGACC	18-14	Silene_conica_mito_25	49420	A>G	TTCATTCCACTTGTTTAGCCAATGCCCCCTTTTCTTGCAAAGACAAGTACAGGACCCCCCAACCTCAGTGCGGAAATGTCATCAGCGGCTCTTTCTACATAGAAGAACTCCGCCCGATGCCCCATCAAGTGTCAAGTCTCAATCAAACCTTCCAGCAAGGTTTCAAGGGGCTTGCTCC
Silene conica	2	cp	ATTTCCATCTACTACTAGCGCTTT	16-6	Silene_conica_mito_25	49420	A>G	AGACAAGTACAGGACCCCCCAACCTCAGTGCGGAAATGTCATCAGCGGCTCTTTCTACATAGAAGAACTCCGCCCGATGCCCCATCAAGTGTCAAGTCTCAATCAAACCTTCCAGCAAGGTTTCAAGGGGCTTGCTCCATCTACCTACTTTGCTTTCTTGACTTGCTTCTTTA
Silene conica	2	cp	AAAGAACACAATACGCGACATCGC	25-19	Silene_conica_mito_25	49420	A>G	TCTCTTCCTTCTTATCCTTTCACTACGCTCGAGCCTCTTTTCATTCCACTTGTTTAGCCAATGCCCCCTTTTCTTGCAAAGACAAGTACAGGACCCCCCAACCTCAGTGCGGAAATGTCATCAGCGGCTCTTTCTACATAGAAGAACTCCGCCCGATGCCCCATCAAGTGTCAAGTCT
Silene conica	2	cp	AGTCAAAAACATCGTAAAGAAAGT[R2]	8-6	Silene_conica_mito_25	49420	A>G	GAGCCTCTTTTCATTCCACTTGTTTAGCCAATGCCCCCTTTTCTTGCAAAGACAAGTACAGGACCCCCCAACCTCAGTGCGGAAATGTCATCAGCGGCTCTTTCTACATAGAAGAACTCCGCCCGATGCCCCA
Silene conica	2	cp	CATTTGGGGACTGGGTCGCCCGAT	12-7	Silene_conica_mito_25	49420	A>G	ACATGCTAGCTAAATGGTCGTCTTAGGATCGCGGGCCTAAGCCTCTCTTCCTTCTTATCCTTTCACTACGCTCGAGCCTCTTTTCATTCCACTTGTTTAGCCAATGCCCCCTTTTCTTGCAAAGACAAGTACAGGACCCCCCAACCTCAG
Silene conica	3	cp	CCTCAACCTTTGGGATGCCAAATC	12-11	Silene_conica_mito_25	49420	A>G	AAAGACAAGTACAGGACCCCCCAACCTCAGTGCGGAAATGTCATCAGCGGCTCTTTCTACATAGAAGAACTCCGCCCGATGCCCCATCAAGTGTCAAGTCTCAATCAAACCTTCCAGCAAGGTTTCAAGGGGCTTGCTCCATCTACCTA
Silene conica	3	cp	ATTTGTAAAAAACGCCTTTGGAAC	16-16	Silene_conica_mito_25	49420	A>G	TCTCTCTACATGCTAGCTAAATGGTCGTCTTAGGATCGCGGGCCTAAGCCTCTCTTCCTTCTTATCCTTTCACTACGCTCGAGCCTCTTTTCATTCCACTTGTTTAGCCAATGCCCCCTTTTCTTGCAAAGACAAGTACAGGACCCCCCAACCTCAGTGCGGAAATGTCATCAGCGGCTCTTTCTACATAGAAGAACTCCGCCCGATGCCCCATCAAGTGTCAAGTCTC
Silene conica	3	cp	CCCCTTAAATCCTCACCAAGGCGT	13-12	Silene_conica_mito_25	49420	A>G	TACGCTCGAGCCTCTTTTCATTCCACTTGTTTAGCCAATGCCCCCTTTTCTTGCAAAGACAAGTACAGGACCCCCCAACCTCAGTGCGGAAATGTCATCAGCGGCTCTTTCTACATAGAAGAACTCCGCCCGATGCCCCATCAAGTGTCAAGTCTCAATCAAACCTTCCAGCAAGGTTTCAAGGGGCTTGCTCCATCT
Silene conica	3	cp	CCGCCCCGGCATTCAATTCATTAC	16-13	Silene_conica_mito_25	49420	A>G	TACATGCTAGCTAAATGGTCGTCTTAGGATCGCGGGCCTAAGCCTCTCTTCCTTCTTATCCTTTCACTACGCTCGAGCCTCTTTTCATTCCACTTGTTTAGCCAATGCCCCCTTTTCTTGCAAAGACAAGTACAGGACCCCCCAACCTCAGTGCGGAAATGTCATCA
Silene conica	3	cp	GATAAGGTAGGATTTAAGATTGAA[R2]	8-7	Silene_conica_mito_25	49420	A>G	ACTTGTTTAGCCAATGCCCCCTTTTCTTGCAAAGACAAGTACAGGACCCCCCAACCTCAGTGCGGAAATGTCATCAGCGGCTCTTTCTACATAGAAGAACTCCGCCCGATGCCCCATCAAGTGTCAAGTCTCA
Silene conica	3	cp	CTAATTTCCTAGGTGAGTCCTACG	12-12	Silene_conica_mito_25	49420	A>G	TCTTTTCATTCCACTTGTTTAGCCAATGCCCCCTTTTCTTGCAAAGACAAGTACAGGACCCCCCAACCTCAGTGCGGAAATGTCATCAGCGGCTCTTTCTACATAGAAGAACTCCGCCCGATGCCCCATCAAGTGTCAAGTCTCAATCAAACCTTCCAGCAAGGTTTCAAGGGGCTTGCTCCATCTACCTACTTTGCTTTCTTGACTTGCTTCTTTAGTATTTAAAGGGCTT
Silene conica	3	mt	ATTAAATAATCTCCAAGAGCAACT[R2]	27-7	Silene_conica_mito_25	49420	A>G	CTTTTCATTCCACTTGTTTAGCCAATGCCCCCTTTTCTTGCAAAGACAAGTACAGGACCCCCCAACCTCAGTGCGGAAATGTCATCAGCGGCTCTTTCTACATAGAAGAACTCCGCCCGATGCCCCATCAAGT
Silene conica	3	mt	CAATACTATAATCTCCGGGCGTCA[R1]	25-19	Silene_conica_mito_25	49420	A>G	TGCAAAGACAAGTACAGGACCCCCCAACCTCAGTGCGGAAATGTCATCAGCGGCTCTTTCTACATAGAAGAACTCCGCCCGATGCCCCATCAAGTGTCAAGTCTCAATCAAACCTTCCAGCAAGGTTTCAAGG
Silene conica	3	mt	CCGCATCTATTGGAAGAAAAAAAT[R1]	18-10	Silene_conica_mito_25	49420	A>G	CCCCCTTTTCTTGCAAAGACAAGTACAGGACCCCCCAACCTCAGTGCGGAAATGTCATCAGCGGCTCTTTCTACATAGAAGAACTCCGCCCGATGCCCCATCAAGTGTCAAGTCTCAATCAAACCTTCCAGCA
Silene conica	3	mt	GACTAGTACAATTGACCCCCACCC[R1]	23-15	Silene_conica_mito_25	49420	A>G	TATCCTTTCACTACGCTCGAGCCTCTTTTCATTCCACTTGTTTAGCCAATGCCCCCTTTTCTTGCAAAGACAAGTACAGGACCCCCCAACCTCAGTGCGGAAATGTCATCAGCGGCTCTTTCTACATAGA
Silene conica	3	mt	GCTTTAGGAGAATGATTTACGAGG	19-19	Silene_conica_mito_25	49420	A>G	CACTTGTTTAGCCAATGCCCCCTTTTCTTGCAAAGACAAGTACAGGACCCCCCAACCTCAGTGCGGAAATGTCATCAGCGGCTCTTTCTACATAGAAGAACTCCGCCCGATGCCCCATC
Silene conica	3	mt	CAAACTCCAATAGGGCCTCACAGG	25-13	Silene_conica_mito_25	49420	A>G	TAGCCAATGCCCCCTTTTCTTGCAAAGACAAGTACAGGACCCCCCAACCTCAGTGCGGAAATGTCATCAGCGGCTCTTTCTACATAGAAGAACTCCGCCCGATGCCCCATCAAGTGTCAAGTCT
Silene conica	3	mt	CCATGCCAAGATTCGTTATCCTTA	20-18	Silene_conica_mito_25	49420	A>G	GATCGCGGGCCTAAGCCTCTCTTCCTTCTTATCCTTTCACTACGCTCGAGCCTCTTTTCATTCCACTTGTTTAGCCAATGCCCCCTTTTCTTGCAAAGACAAGTACAGGACCCCCCAACCTCAGTGCGGAAATGTCATCAGCGGCTCTTTCTACATAGAAGAACTCCGCCCGATGCCCCATCAAGTGTCAAGTCTCAATCAAACCTTCCAGCA
Silene conica	3	mt	GCCGGCCAGCCGTGCTCAGGGAAC	29-13	Silene_conica_mito_25	49420	A>G	TTTCTTGCAAAGACAAGTACAGGACCCCCCAACCTCAGTGCGGAAATGTCATCAGCGGCTCTTTCTACATAGAAGAACTCCGCCCGATGCCCCATCAAGTGTCAAGTCTCAATCAAACCTTCCAGCAAGGTTTCAAGGGGCTTGCTCCATCTACCTACTTTGCTTTCTT
Silene conica	3	mt	GGGGTGGCCCTTTGCAAAGCTTCA[R1]	15-8	Silene_conica_mito_25	49420	A>G	CTTTTCATTCCACTTGTTTAGCCAATGCCCCCTTTTCTTGCAAAGACAAGTACAGGACCCCCCAACCTCAGTGCGGAAATGTCATCAGCGGCTCTTTCTACATAGAAGAACTCCGCCCGATGCCCCATCAAGT
Silene conica	3	mt	TAGCGTTCAATCTGCCACATATCG[R2]	30-12	Silene_conica_mito_25	49420	A>G	AGGATCGCGGGCCTAAGCCTCTCTTCCTTCTTATCCTTTCACTACGCTCGAGCCTCTTTTCATTCCACTTGTTTAGCCAATGCCCCCTTTTCTTGCAAAGACAAGTACAGGACCCCCCAACCTCAGTGCGGAA
Silene conica	3	mt	ATATTTTCCTCTGATCGGCGAGAG[R1]	12-8	Silene_conica_mito_25	58920	A>G	CCCCGATCTTAAAGTTGAAAGCATGAGATGTATGTGATGATAAAGAAGCCCTCTTTATAAATTAGATTAGCACTAAAACTATGTTTAGTCAAGGGTAAAAAAGAGACCTTTAATCTTTTAATCTCTTGTATTG
Silene conica	1	mt	GCTCATGGATATTTCTCCCATCAC[R2]	16-11	Silene_conica_mito_26	35502	A>G	GACCCAGAGGGCGGACGGCTGACAAGGAGGTAGAGTAGGGGGAGACTGAGGTACGAAGGAGCGGGGAGAGGACCCGAAGGGCGAACGACTAGAAGGAGGTAGAGTAGAGAGGTCCCAAGTGGTGATGAAATAG
Silene conica	3	cp	ACACATTGCTCTACCGATCGACAC	17-8	Silene_conica_mito_26	92216	A>G	TAGAAAGAGTTTGGATTCTATACGCAGGGGTATGATGTGTGTGAGGGCATGGCCCTCGCTTTACTCACCTTTTTGAAGAAAAAAGAATATAAGTAAGAAGGGGGGATCCCCGTGGGAGTTTACGAGCGAAATTCCTTTCTTCTTTTGGTTCTACATTGCAAGGGCATGT
Silene conica	1	mt	AAATTTTGATACAATCCAAAAGAG	17-11	Silene_conica_mito_27	10495	A>C	TCTTCTCTTTTTCTTTCGATTGGGCTTTGCTAAACTTATTTAATTTGTGTATTTGAACCAGATAGAGCAAAATATCTATTTCACACACTGTCTTTACAGTCTAGGGACGGCTTTTCACATAAAGAAATTCGAA
Silene conica	1	mt	CGTTGCAAACTATATTATTACCCC	19-19	Silene_conica_mito_27	10495	A>C	ATATATGTATACGCATTAAAAGCTATTTCCATTTGCTTGTCTTCTCTTTTTCTTTCGATTGGGCTTTGCTAAACTTATTTAATTTGTGTATTTGAACCAGATAGAGCAAAATATCTATTTCACACACTGTCTTTACAGTCTAGGGACGGCTTTTCACATAAAGAAATTCGAAGAGTAGAGAAG
Silene conica	1	mt	GGACCGGGAATATACAAAGCTCAC[R1]	19-19	Silene_conica_mito_27	10495	A>C	ATTGGGCTTTGCTAAACTTATTTAATTTGTGTATTTGAACCAGATAGAGCAAAATATCTATTTCACACACTGTCTTTACAGTCTAGGGACGGCTTTTCACATAAAGAAATTCGAAGAGTAGAGAAGTGAGACT
Silene conica	3	cp	CTAAGGAATGCCGACGTACGTGGC[R2]	18-8	Silene_conica_mito_27	10495	A>C	CACACACTGTCTTTACAGTCTAGGGACGGCTTTTCACATAAAGAAATTCGAAGAGTAGAGAAGTGAGACTAGACTGAGGGACGAAGTGGAGGCGCGGTATACGAGGTCGAGTGCATATGAGAGGAGAGAGGGG
Silene conica	3	mt	CCCGGCCTTAACGAGCACAAGAAG	24-17	Silene_conica_mito_27	10495	A>C	TTCGATTGGGCTTTGCTAAACTTATTTAATTTGTGTATTTGAACCAGATAGAGCAAAATATCTATTTCACACACTGTCTTTACAGTCTAGGGACGGCTTTTCACATAAAGAAATTCGAAGAGTAGAGAAGTGAGACTAGACTGAGGGACG
Silene conica	3	cp	AATATCACATTACCACAGCCCCCC	20-10	Silene_conica_mito_27	13971	C>G	TACTTCTTCCCAAGGGAGCTCATCTTCTTATTCTTCCTAATGGTCTTATCCTCTCACTTTGTTCGAACCTTTCTCCTCTCGCTACACTCGAGCTACAAATACCCACTCATTTCTGGTCGTTAACAGCTCTCGCGACCTCCCCTCTCCTTCTAGTCTACGCCACTTCGGGTCGAACAAAGAAGAAATTC
Silene conica	1	mt	TATACTCACTGATGCTGTGAAGTT	20-5	Silene_conica_mito_27	18190	C>G	TGAAAGCAGCTTGAAACCTCTATTACCATATATGTATATAAGAATGAATACAATCCGAGAAAAAAGAATGCAGGAGAAGGCTCTTTTCTTTTCGCATCTTTCCTTTGTTCCATAAGCACTCAACTTGACACTTAAGCCGGAGAAGGGGATCTGGCTACTGACGACTTAAAGAAGTCAGG
Silene conica	3	mt	ATAATAACCAAACAATGGGAAAAA[R2]	26-10	Silene_conica_mito_27	18190	C>G	TCCGAGAAAAAAGAATGCAGGAGAAGGCTCTTTTCTTTTCGCATCTTTCCTTTGTTCCATAAGCACTCAACTTGACACTTAAGCCGGAGAAGGGGATCTGGCTACTGACGACTTAAAGAAGTCAGGAGTGCTA
Silene conica	2	cp	GCATGACTGAGTTTGTGGAACACG[R2]	12-6	Silene_conica_mito_28	41950	A>T	CCCTTAATAAAGCTGTTATAAAACCTAATTTATCTAATAGAGATTAATCCTATATAATGTAGGGCCAAAGCAGCACTCCTCTTTTTCAAGAGTTCGCATAGTAAAAGAAAAGGCTATACAAACTTAGTTGGCT
Silene conica	2	cp	AAGGGCTAGAATCTGGCGGGCGAA[R1]	12-6	Silene_conica_mito_28	92075	A>C	TGGATTTAGTTTTTGGAAAGTAGTAGGGCCGGCCCTTTCTGGCTGGGGTTGAGGCGTACACTATGCCCTTGCTTCTCCTAAATACGTATTATGTAAAGGGACTCCCCGAGCAAACAACAAGGAAGTTATTGCC
Silene conica	3	mt	CAAATGAGCAATTTAAGCGTGCGT[R1]	19-15	Silene_conica_mito_28	95488	C>A	ATAGAAGAGCGTCAGTGGAGCGCCCGTCTTATAAAGTCTTCGACCAAAACCCCCCCTATACATATGAGCGAAGATTAGAACTATACCTTTGAATCTCGCTTCGGGTGCTTCAAAAGTAGTAGTAGTAGTCGAC
Silene conica	1	cp	ATTTAACCGAGGTACGGACAATAT	21-16	Silene_conica_mito_29	23262	A>G	AGAGAGAAATGAGACTCGAGTGAATACGACCATAGAATGGAGATGAAAAGAGATCGACCAACGGAAGAAGGGAGTAGACCGGGGGGATTCTCGGGCCGATCCTGTTGCATTTCTTTGCAAATCAAATAGAGCCCCTCTACCATTTTGATTTTGCTATCTTTTCGGCCTCTGCTCTTGGAACTTTGTTAGTTTCGGGTGC
Silene conica	1	mt	AACGGGGAAACCGAACTTTGCCAA[R1]	9-5	Silene_conica_mito_29	23262	A>G	AGGGAGTAGACCGGGGGGATTCTCGGGCCGATCCTGTTGCATTTCTTTGCAAATCAAATAGAGCCCCTCTACCATTTTGATTTTGCTATCTTTTCGGCCTCTGCTCTTGGAACTTTGTTAGTTTCGGGTGCAT
Silene conica	1	mt	CACTAAAATCTGCAGATTAAGGAC	19-10	Silene_conica_mito_29	23262	A>G	GATCCTGTTGCATTTCTTTGCAAATCAAATAGAGCCCCTCTACCATTTTGATTTTGCTATCTTTTCGGCCTCTGCTCTTGGAACTTTGTTAGTTTCGGGTGCATACGAGAGGGCCGAAGGGGGACCGATCGCAGAGAGAGGGTGAAAGGTTGCAGCATGATGAAGAAGCGGT
Silene conica	1	mt	CCAGGCCATCAGCGGATCACCATC[R2]	7-4	Silene_conica_mito_29	23262	A>G	TCCTGTTGCATTTCTTTGCAAATCAAATAGAGCCCCTCTACCATTTTGATTTTGCTATCTTTTCGGCCTCTGCTCTTGGAACTTTGTTAGTTTCGGGTGCATACGAGAGGGCCGAAGGGGGACCGATCGCAGA
Silene conica	2	cp	ACAGACCAAATACAATCCGACCTA	11-7	Silene_conica_mito_29	23262	A>G	CCATTTTGATTTTGCTATCTTTTCGGCCTCTGCTCTTGGAACTTTGTTAGTTTCGGGTGCATACGAGAGGGCCGAAGGGGGACCGATCGCAGAGAGAGGGTGAAAGGTTGCAGCATGATGAAGAAGCGGTGAGGTAACGAGATCGAGCATAGCGAGAGGAGAGAGAAGAGAGAATTGG
Silene conica	2	cp	CGCCACCTATGGTGTCTAACATCC	11-10	Silene_conica_mito_29	23262	A>G	CCCCTCTACCATTTTGATTTTGCTATCTTTTCGGCCTCTGCTCTTGGAACTTTGTTAGTTTCGGGTGCATACGAGAGGGCCGAAGGGGGACCGATCGCAGAGAGAGGGTGAAAGGTTGCAGCATGATGAAGAAGCGGTGAGGTAACGAGATCGAGCATAGCGAGAGGAGAGAGAAGAGAGAATTGGGACTCGACCTGAGGCAAAAGGTCCGGGTCCGTGCGGGGAGTGGGG
Silene conica	2	cp	CTAGCAAATAAAGTAAGGAGAGCA[R1]	12-11	Silene_conica_mito_29	23262	A>G	ACCATTTTGATTTTGCTATCTTTTCGGCCTCTGCTCTTGGAACTTTGTTAGTTTCGGGTGCATACGAGAGGGCCGAAGGGGGACCGATCGCAGAGAGAGGGTGAAAGGTTGCAGCATGATGAAGAAGCGG
Silene conica	3	mt	CGCGGGCAACATGAAGAAAAAACC	13-9	Silene_conica_mito_29	23262	A>G	CGAGTGAATACGACCATAGAATGGAGATGAAAAGAGATCGACCAACGGAAGAAGGGAGTAGACCGGGGGGATTCTCGGGCCGATCCTGTTGCATTTCTTTGCAAATCAAATAGAGCCCCTCTACCATTTTGATTTTGCTATCTTTTCGGCCTCTGCTCTT
Silene conica	3	mt	GATTCGCTCAGGGGGTAGACGAGC	20-15	Silene_conica_mito_29	23262	A>G	AGGAGAGAGAAATGAGACTCGAGTGAATACGACCATAGAATGGAGATGAAAAGAGATCGACCAACGGAAGAAGGGAGTAGACCGGGGGGATTCTCGGGCCGATCCTGTTGCATTTCTTTGCAAATCAAATAGAGCCCCTCTACCATTTTGATTTTGCTATCTTTTCGGCCTCTGCTCTTG
Silene conica	3	mt	AATGCTAAGATAGGCCCAGCGACT	19-14	Silene_conica_mito_29	23262	A>G	AGAATGGAGATGAAAAGAGATCGACCAACGGAAGAAGGGAGTAGACCGGGGGGATTCTCGGGCCGATCCTGTTGCATTTCTTTGCAAATCAAATAGAGCCCCTCTACCATTTTGATTTTGCTATCTTTTCGGCCTCTGCTCTTGGAACTTTGTTAGTTT
Silene conica	3	mt	AATGGTATAAGGGTAAGTTGTATA[R1]	11-7	Silene_conica_mito_29	23262	A>G	CATTTTGATTTTGCTATCTTTTCGGCCTCTGCTCTTGGAACTTTGTTAGTTTCGGGTGCATACGAGAGGGCCGAAGGGGGACCGATCGCAGAGAGAGGGTGAAAGGTTGCAGCATGATGAAGAAGCGGTGAGG
Silene conica	1	cp	GATGACATGTATTTAGCCTTATTA[R1]	24-17	Silene_conica_mito_29	70745	A>C	TTTCATTTGAGCCTTTTTCTCTGTCTTTCTTGTGCGAAGTAATGCTGAGTGTAGGTCTTTAGGGTTCAAGTTCCTGTTGAACTTCCTTCTTTTTCATGCACGAACTTGACGCCCTAAGGCATCTATCTA
Silene conica	1	mt	GCCCCACATGTTTGACCTCGTTTC	18-16	Silene_conica_mito_29	70745	A>C	CTAGGAGTGAGCTCCTTTTTCTCGGATCTTTTCATTTGAGCCTTTTTCTCTGTCTTTCTTGTGCGAAGTAATGCTGAGTGTAGGTCTTTAGGGTTCAAGTTCCTGTTGAACTTCCTTCTTTT
Silene conica	3	mt	TAAAAAGACAACTATATGAGGTCT	20-16	Silene_conica_mito_3	16423	A>T	CTGGTCGTTGTACTGAAACTTCTTTCGCTTTGGAACGAATAAAGAAGTAGAATAGCCGAGTTTTCTGGAAGGAAGCGTCCTTTTCTATCAGAAGGTCGAGCTTCTATACAGCCTTGGTGTCTTTCCTTAATGTAAGGTGTCAAGGCCAGGCCGCCATCTGTCAGTGCATCTTTTTCTCA
Silene conica	3	mt	GGCCCAACGCGTTTAGGAAATGTT	21-18	Silene_conica_mito_3	50830	A>T	AGATTTCTATTACTTGCAGTCTATCCCAAAAAGAGAAGAACTACTAATCTCTTTTAATACTACGGGTGGGATAAAAGTCTTTCTATACGAACCTCGCCCTATCGAGATAGAGCCTTAGCTTGGCTTTGGGTCCTGCTTGATGTCTAACGACGACGGGA
Silene conica	1	mt	AGTAATCCTATATGGGCAGAACAC	17-7	Silene_conica_mito_30	32178	A>G	GTCCTTTTGTACTGTTTTTAGGTCAATTGGGAACCTCTTATAACCGACCCTTGTCTACTGTAATCCTATTCAACAACCCTAAGGCGTCAGTCGAAGTCCCCTTTTGTAGATACTTTAGAGAAAGAGGTCTCTATTTCAGCGTCGGGAAAGCTACATGGATCTATGGAAGACAAGGAGGAGGATGCTCGTTTGATTATGAAGGTTGGGCCTAA
Silene conica	1	mt	ATATAAGCAACAGATTCTGCCTAA	20-17	Silene_conica_mito_30	32178	A>G	AAAACTTTGTTAGTATTTCCCTGGGTTTGGTCCTTTTGTACTGTTTTTAGGTCAATTGGGAACCTCTTATAACCGACCCTTGTCTACTGTAATCCTATTCAACAACCCTAAGGCGTCAGTCGAAGTCCCCTTTTGTAGATACTTTAGAGAAAGAGGTCTCTATTTCAGCGTCGGGAAAGCTACATGGATCTATGGAAGACAAGGAGGAGGATGCTCGTTTGATTATGAAGGTTGGGC
Silene conica	1	mt	GAAGTTTCCAGTGCACCAGTATGA	20-15	Silene_conica_mito_30	32178	A>G	GTTAGTATTTCCCTGGGTTTGGTCCTTTTGTACTGTTTTTAGGTCAATTGGGAACCTCTTATAACCGACCCTTGTCTACTGTAATCCTATTCAACAACCCTAAGGCGTCAGTCGAAGTCCCCTTTTGTAGATACTTTAGAGAAAGAGGTCTCTATTTCAGCGTCGGGAAAGCTACATG
Silene conica	1	mt	ACGACGGCCAGGAGGATAGGCGCG[R1]	16-15	Silene_conica_mito_30	32178	A>G	ATTTCCCTGGGTTTGGTCCTTTTGTACTGTTTTTAGGTCAATTGGGAACCTCTTATAACCGACCCTTGTCTACTGTAATCCTATTCAACAACCCTAAGGCGTCAGTCGAAGTCCCCTTTTGTAGATACTTTAG
Silene conica	2	cp	AAACCCGGCGCCCCTTGATTGGCC[R1]	19-3	Silene_conica_mito_30	32178	A>G	GAACCTCTTATAACCGACCCTTGTCTACTGTAATCCTATTCAACAACCCTAAGGCGTCAGTCGAAGTCCCCTTTTGTAGATACTTTAGAGAAAGAGGTCTCTATTTCAGCGTCGGGAAAGCTACATGGATCTA
Silene conica	2	cp	CCCTCCCAGTGATGACGCCCTCCA[R2]	15-12	Silene_conica_mito_30	32178	A>G	ATCCTATTCAACAACCCTAAGGCGTCAGTCGAAGTCCCCTTTTGTAGATACTTTAGAGAAAGAGGTCTCTATTTCAGCGTCGGGAAAGCTACATGGATCTATGGAAGACAAGGAGGAGGATGCTCGTTTGATT
Silene conica	2	cp	ACTTGATCGCTACATATAGAGGCA[R1]	10-9	Silene_conica_mito_30	32178	A>G	TTGTCTACTGTAATCCTATTCAACAACCCTAAGGCGTCAGTCGAAGTCCCCTTTTGTAGATACTTTAGAGAAAGAGGTCTCTATTTCAGCGTCGGGAAAGCTACATGGATCTATGGAAGACAAGGAGGAGGAT
Silene conica	3	cp	CTTTAAGGGAAATGGAACCAGGTT	15-8	Silene_conica_mito_30	32178	A>G	CTAAACAGGCTTCTAGGAAAGGTTGAGCCCATTCTTGTCCTTTAAAACCCTCTTGGAAAAAACTTTGTTAGTATTTCCCTGGGTTTGGTCCTTTTGTACTGTTTTTAGGTCAATTGGGAACCTCTTATAACCGACCCTTGTCTACTGTAATCCTATTCAACAACCCTAAGGCGTCAGTCGAAGTCCCCTTTTGTAGATACTTTAGAGAAAGAGGTCTCTATTTCAGCGTCGGGAAA
Silene conica	3	cp	AAACCCATGGAATTAGCATTCGCA[R1]	10-6	Silene_conica_mito_30	32178	A>G	GAAAAAACTTTGTTAGTATTTCCCTGGGTTTGGTCCTTTTGTACTGTTTTTAGGTCAATTGGGAACCTCTTATAACCGACCCTTGTCTACTGTAATCCTATTCAACAACCCTAAGGCGTCAGTCGAAGTCCCC
Silene conica	3	mt	AGAACTCGGGCGTAAGCACCTGGT[R2]	21-14	Silene_conica_mito_30	32178	A>G	ACCTCTTATAACCGACCCTTGTCTACTGTAATCCTATTCAACAACCCTAAGGCGTCAGTCGAAGTCCCCTTTTGTAGATACTTTAGAGAAAGAGGTCTCTATTTCAGCGTCGGGAAAGCTACATGGATCTATG
Silene conica	3	mt	AACAGATAGGCCTATAATCTGGAT	24-20	Silene_conica_mito_30	32178	A>G	CTGGGTTTGGTCCTTTTGTACTGTTTTTAGGTCAATTGGGAACCTCTTATAACCGACCCTTGTCTACTGTAATCCTATTCAACAACCCTAAGGCGTCAGTCGAAGTCCCCTTTTGTAGATACTTTAGAGAAAGAGGTCTCTATTTCAGC
Silene conica	3	mt	GACCCACAGCATTATGTCCGGAGT	25-16	Silene_conica_mito_30	32178	A>G	TTTTGTACTGTTTTTAGGTCAATTGGGAACCTCTTATAACCGACCCTTGTCTACTGTAATCCTATTCAACAACCCTAAGGCGTCAGTCGAAGTCCCCTTTTGTAGATACTTTAGAGAAAGAGGTCTCTATTTCAGCGTCGGGAAAGCTACATGGA
Silene conica	3	cp	ATTCTAGTTAAATCCAAGCAACTT[R1]	11-4	Silene_conica_mito_30	39646	A>T	CACTCCATGGAAAAGCCATTTGAATGAGACTGGGACCCTCTCGGCTCTGAAGGAAGGTAAGAAAGAGAGAAAGAGACGAATTCAATATCATATGAGTAAATGAATCAGAAAGAGAGTGCAGTAGCCCCTCTTA
Silene conica	1	mt	ATGACTCCACGAGAACAATACCAA	20-14	Silene_conica_mito_30	77470	A>T	GAGACTGACAGACGTAGAAGCTTCATCTAATCCTGTGCAAGTTAGCGCAAAAAAGGCAAGTACAAATCTCGGAGAACCATAACAGAGTTACGAGAAAAGAGATAGCTAGAAACTGCTGTATGAACTTAATCTCCGATTGGCGTCTTCTT
Silene conica	2	cp	AATTGGCGTCACGATTCGACCAAA[R2]	10-5	Silene_conica_mito_31	7670	A>G	GTAAAGAGAATTCCAGTAAGGGGGGTTGCCGTCGCATTTACCTTGTGTAAAGGTAACGGTCAGAGTAAGCTGATGAGGGCTCCTACTCACATATGTATAAGATAAGAAGGTTTTTCTAAGAGCTTTGAATGGG
Silene conica	3	mt	ACTGACTCACCGTCAAAAACTCGA[R2]	22-21	Silene_conica_mito_31	7670	A>G	TCGAGGTAGGAGAGTGTAATTATTGTATAACATGGGACAAAGAGGGGGGTAAAGAGAATTCCAGTAAGGGGGGTTGCCGTCGCATTTACCTTGTGTAAAGGTAACGGTCAGAGTAAGCTGATGAGGGCTCCTA
Silene conica	3	mt	CAATTTTCATTTCATCAATCAGCT	21-19	Silene_conica_mito_31	7670	A>G	AGAATTCCAGTAAGGGGGGTTGCCGTCGCATTTACCTTGTGTAAAGGTAACGGTCAGAGTAAGCTGATGAGGGCTCCTACTCACATATGTATAAGATAAGAAGGTTTTTCTAAGAGCTTTGAATGGGAATTACCTGGAAAAGGTTTCTCGGATGCTCGTTTGCGAAC
Silene conica	3	mt	TATTCACGTCACTGTCGTATACCC	18-15	Silene_conica_mito_31	7670	A>G	CTTTTACTTTCTTTAGTTTTCTTTCTTCGCTTCCTTGCTTCTCTCTTCGGATTCGTAACATCTCCCCGTTGTTACATTAAGCCAGGACTTTTTTCATTACAAAGTCTTCTCTTCCTGTATTTCGAGGTAGGAGAGTGTAATTATTGTATAACATGGGACAAAGAGGGGGGTAAAGAGAATTCCAGTAAGGGGGGTTGCCGTCGCATTTACCTTGTGTAAAG
Silene conica	2	cp	CAAGTCTAGGCCTAGCAGAGATGC[R1]	14-5	Silene_conica_mito_31	11906	A>G	ATTTTCTTTGTCTACTGGATCGGCTAATACTTTCGCAAGATCCTTATCCGTCTTCATTACGTTTGTGTTCGGCAGAAGTTCTCTACTAAAATCGGTACCTAACACGCATACAAAACCCTTATGATTCTAATCA
Silene conica	2	cp	CTGGTAGACCAATACACGTAGGGC	10-6	Silene_conica_mito_31	43795	A>G	ACCTAGCCATAGAGGGGTCTATCACATGCATTTCATAAGAAAGATTTCATACCTTTGTTTCAGCCGCAAAGTACAATAGTTTTTTGATTGAGAACCAAAAGAAAAGCCTCCTGTACTTCTAC
Silene conica	3	mt	AAGGCTGATAGTGAAAACGCCACG	26-9	Silene_conica_mito_31	43795	A>G	GGTTCAAATCTCAGAGGGGGAAAGAGGGCGGTCGCGTATATAGATAGCACGCTAGCTTGATCGGACATTCAACTAAACCAACCTAGCCATAGAGGGGTCTATCACATGCATTTCATAAGAAAGATTTCATACCTTTGTTTCAGCCGCAAAGTACAATA
Silene conica	3	mt	CCGAGCCTTACTCCGTCAAAAGCA	20-13	Silene_conica_mito_31	43795	A>G	AGAGGGCGGTCGCGTATATAGATAGCACGCTAGCTTGATCGGACATTCAACTAAACCAACCTAGCCATAGAGGGGTCTATCACATGCATTTCATAAGAAAGATTTCATACCTTTGTTTCAGCCGCAAAGTACAATAGTTTTTTGATTGAGAACCAAAAGAAAAGCCTCCTGTACTTCTACAGGCACAGAAGGCAGATCAGATACAT
Silene conica	3	cp	ACGAAAGTGTATGCCCGTGCTCGA	7-6	Silene_conica_mito_31	44293	A>G	AAAGCTTAGTAAAGTGCTCCACTGCCCTGGAGAGAGACGGGACTGACAAGGACCAAAGGAAGAGGAGAAGACTCGACAGAAGTACGAGGAGCGTAGCCTTGTTGTTCTACCCGAAGCGGCACTCGGCTGTCAAGAATAGGAACCTATTATGGGAATCGGCTATAAAGGAAAGGAAGGGTAGCAACCCCAGTAGAGTTTCTGCGAATTATGAAGAAAAGTCTTCTAAGAACCTT
Silene conica	2	cp	ACCCACGTCGAAAGACAGAATTGC[R1]	21-12	Silene_conica_mito_31	54019	A>G	AGAAAGAAGGGATGAAGAAAAGAATACACAAAAGGCGAAGCCGAATACTTAGAAGTTGGGGCCGGCGGAAAAGGAAGCTGCATCAAGACAAGACGCCGAAACAGAATAGGAAGAAGGATCAAGAGAAGCTTCA
Silene conica	3	cp	CACATTAGAGAATCAGGTATTTAA	14-13	Silene_conica_mito_31	54019	A>G	TTCCCCTCGTAAGAAGAATGAGTCAAAGGAGGATTAAAACGATGTATCAGAAAGAAGGGATGAAGAAAAGAATACACAAAAGGCGAAGCCGAATACTTAGAAGTTGGGGCCGGCGGAAAAGGAAGCTGCATCAAGACAAGACGCCGAAACAGAATAGGAAGAAGG
Silene conica	1	mt	GCAATAAGAATCGTAGAGTAAAAA	15-8	Silene_conica_mito_33	60246	A>G	TGAAACATGAAGACGAGGATTTACCCTCGGCTGCTAAGTAGAGGAGAGGAAAGAGGTAGAGGAGAAAGAAATGAGACTCGACTGTCAAGCTAATAGGCTTGGTGTTATGAGGAGACTGAGGAGAGATCTTTTTCCCTTGTTCTACCCGAAGTAAGCGGGACTTGACT
Silene conica	1	mt	CCTAGACTAGGCTGGTTTGTTAAA[R2]	7-4	Silene_conica_mito_33	71536	A>G	TCTCTCTATTCTAATAGAAGAGTTTTTCCAATTGGCAGGGGGTGAGTAATCTCAAAGAAAGAGGCGGAGGTTTCGGGGCATCGGCAAAGAGCGGAGTGGAATCCCCCATATGAGGAGTATGGTTGTCAAGAAG
Silene conica	3	cp	CAATTCTATGGGGAGCCATATCCC	11-9	Silene_conica_mito_33	76126	C>T	CCTCTCATTACAAACTGGATGGCCCCCTTTCTTTAGTATAAAGGGTCTTCTCCTCTTAGTTCTTGTCCAAAACAAAGAACTCGTCTGTCTTTGCTGCTTGTCGTAGGCTCCGTCTCTTTTACTAGTTGAGTGTATACGTGAGAGATTCTTAAGTGAGTGATTTCTCGGGGACGATCTCTATTTACATCTCTATAGGTCTCTCTTACAGATAAAGCTCA
Silene conica	3	cp	GGATCCGATCCGGGGTCTAAACAA[R2]	16-14	Silene_conica_mito_33	88133	C>A	TAGAGAATTTATTGATGCCCTGTAACAGCCTACTTGCTTGATAAGACAGCCTTTGTTTTTAGTTTGCAAGGAAATTCGCCCTTTCCTTTATTGACTTGCTTTCGACCTTTTTTTACTTTACAAGCAAAGGCTA
Silene conica	1	cp	CAAGCACACTAATTTGTCTGGTCT	21-16	Silene_conica_mito_33	88586	A>G	TATCTCAGGGGATTCATCCGCCTTCCGGTCGAGCTATACATTGCCCCCGGTCCTCTCACCCTCCACGCCTTTTAGTAGAAAACATCCCTTAGGTAGAACTTTCGTATTAATGAAATTAATATATAGGAAAAAAAGAGCAAAAGCATCTTCCTATATAAG
Silene conica	1	cp	AAAGCCCTAAAGAGATGTACCACA	22-11	Silene_conica_mito_33	88586	A>G	CAGGGGATTCATCCGCCTTCCGGTCGAGCTATACATTGCCCCCGGTCCTCTCACCCTCCACGCCTTTTAGTAGAAAACATCCCTTAGGTAGAACTTTCGTATTAATGAAATTAATATATAGGAAAAAAAGAGCAAAAGCATCTTCCTA
Silene conica	1	mt	CTGGATGATAGTGGCGCGAGCGTA	16-12	Silene_conica_mito_33	88586	A>G	TTCTCTATGCGGCGATCCCGCGTTTGTGCTATCTACTCGCCCGCGTATCTCAGGGGATTCATCCGCCTTCCGGTCGAGCTATACATTGCCCCCGGTCCTCTCACCCTCCACGCCTTTTA
Silene conica	2	cp	ATTCTGACATACCCAAGCCGATAT[R2]	7-7	Silene_conica_mito_33	88586	A>G	GTTTGTGCTATCTACTCGCCCGCGTATCTCAGGGGATTCATCCGCCTTCCGGTCGAGCTATACATTGCCCCCGGTCCTCTCACCCTCCACGCCTTTTAGTAGAAAACATCCCTTAGGTAGAACTTTCGTATTA
Silene conica	3	mt	AAACCCATAAACAACTGGCCTTAA[R2]	18-11	Silene_conica_mito_33	88586	A>G	ACTCGCCCGCGTATCTCAGGGGATTCATCCGCCTTCCGGTCGAGCTATACATTGCCCCCGGTCCTCTCACCCTCCACGCCTTTTAGTAGAAAACATCCCTTAGGTAGAACTTTCGTATTAATGAAATTA
Silene conica	3	mt	ATCGCGTTAGGACTATACAGCAAT[R2]	26-25	Silene_conica_mito_33	88586	A>G	CTCTATGCGGCGATCCCGCGTTTGTGCTATCTACTCGCCCGCGTATCTCAGGGGATTCATCCGCCTTCCGGTCGAGCTATACATTGCCCCCGGTCCTCTCACCCTCCACGCCTTTTAGTAGAAAACATCCCTT
Silene conica	3	mt	AACACGAAGGCCCAAAAAAAAAGG	10-9	Silene_conica_mito_33	88586	A>G	CAGGGGATTCATCCGCCTTCCGGTCGAGCTATACATTGCCCCCGGTCCTCTCACCCTCCACGCCTTTTAGTAGAAAACATCCCTTAGGTAGAACTTTCGTATTAATGAAATTAATATATAGGAAAAAA
Silene conica	3	mt	ACAGGGGTGTAAATAAATCAAAGC	26-7	Silene_conica_mito_33	88586	A>G	AGGGCTCCCTGTGAATTTGTTTTCCTATCTCTCTTCCCCCGACTTCTCTATGCGGCGATCCCGCGTTTGTGCTATCTACTCGCCCGCGTATCTCAGGGGATTCATCCGCCTTCCGGTCGAGCTATACATTGCCCCCGGTCCTCTCACCCTCCACGCCTTTTAGTAGAAAACATCCCT
Silene conica	1	cp	ACTGCTCGGTTCGATGGCATTATA[R1]	22-10	Silene_conica_mito_34	22796	A>G	CTTGTTTCGGATAGTGCGAAACTACTATAGCTAGAAAGTTAGTGGCTTACACAAGTTATGAGGCTTTCTCTCTCACCCCTTACTCCTATCAACCAAAACCTATATATTACTATATATAGTAACGAAGAGCTTT
Silene conica	1	cp	CCTCGCAGACCCGGAGAAACCGAA	21-18	Silene_conica_mito_34	22796	A>G	AACCGACGGGGCTGCCGAGCTTGTTTCGGATAGTGCGAAACTACTATAGCTAGAAAGTTAGTGGCTTACACAAGTTATGAGGCTTTCTCTCTCACCCCTTACTCCTATCAACCAAAACCTATATATTACTATATATAGTAACGAAGAGCTTTACTTCTGCCCCAAAC
Silene conica	1	mt	AGCCCAGAGCGGTGATCTAGTCAA	20-6	Silene_conica_mito_34	22796	A>G	GATAGTGCGAAACTACTATAGCTAGAAAGTTAGTGGCTTACACAAGTTATGAGGCTTTCTCTCTCACCCCTTACTCCTATCAACCAAAACCTATATATTACTATATATAGTAACGAAGAGCTTTACTTCTGCCCCAAACTA
Silene conica	1	mt	GCTTATAGTCGTTACCAACTAGCT	14-11	Silene_conica_mito_34	22796	A>G	CTATAGCTAGAAAGTTAGTGGCTTACACAAGTTATGAGGCTTTCTCTCTCACCCCTTACTCCTATCAACCAAAACCTATATATTACTATATATAGTAACGAAGAGCTTTACTTCTGCCCCAAACTATTTGCTTCTTAATGAATTCTTCGTATGGAAAGACTTCGCCTACAGACAGCAAGCACTTTAGTAAGCTTTCACGTGGCGGTTCTTTGTTAGGCTGTTCTACTTGTT
Silene conica	2	cp	ATACGGACAACATACACACCCAGA	9-6	Silene_conica_mito_34	22796	A>G	TTTATAGACTTAGTTGACCTCCCACCTACTACAAATCTTGTAAGAATATGCCGCATTTGGTTCAACCGACGGGGCTGCCGAGCTTGTTTCGGATAGTGCGAAACTACTATAGCTAGAAAGTTAGTGGCTTACACAAGTTATGAGGCTTTCTCTCTCACCCCTTACTCCTATCAACCAAAACCTATATA
Silene conica	3	mt	ATACACAATTACCACCGAGTAAAG[R2]	21-19	Silene_conica_mito_34	22796	A>G	CTACAAATCTTGTAAGAATATGCCGCATTTGGTTCAACCGACGGGGCTGCCGAGCTTGTTTCGGATAGTGCGAAACTACTATAGCTAGAAAGTTAGTGGCTTACACAAGTTATGAGGCTTTCTCTCTCACCCC
Silene conica	3	mt	AAAACGAATCTAAAGTATGCAGCC	16-14	Silene_conica_mito_34	22796	A>G	TCTTTTATAGACTTAGTTGACCTCCCACCTACTACAAATCTTGTAAGAATATGCCGCATTTGGTTCAACCGACGGGGCTGCCGAGCTTGTTTCGGATAGTGCGAAACTACTATAGCTAGAAAGTTAGTGGCTTACACAAGTTATGAGGCTTTCTCTCTCACCCCTTACTCCTATCAACCAAAACCTATATATTACTATA
Silene conica	1	cp	ACTTAGCCGAGATGCACTAAGGCT[R1]	28-17	Silene_conica_mito_34	31164	A>C	CTTTCGCCTATATTAGAACAAACCCACCACTTTTGGGTGTCTTTGACCTCACTTACCCTTGTTTCAAGACTAGCTACTTAATAAAAAGCCCCCGCCTTGCCGGGAGCGCTTCTTTCCTTCCCGCCCCCTCTTG
Silene conica	1	cp	AATAAGAGAATACTTTTGTACTAA	34-26	Silene_conica_mito_34	31164	A>C	CTCTAGTAGTCGAAGAGATTCTCTACGGCAGTTCTTGAGTGAGAGCTTTCGCCTATATTAGAACAAACCCACCACTTTTGGGTGTCTTTGACCTCACTTACCCTTGTTTCAAGACTAGCTACTTAATAAAAAGCCCCCGCCTTGCCGGGAGCGCTTCTTTCCT
Silene conica	1	mt	AGCTCCCGCCGTGATCGAGAATGA	16-13	Silene_conica_mito_34	31164	A>C	TAAGAAGGATTCTTATGACTATCCTCTAGTAGTCGAAGAGATTCTCTACGGCAGTTCTTGAGTGAGAGCTTTCGCCTATATTAGAACAAACCCACCACTTTTGGGTGTCTTTGACCTCACTTACCCTTGTTTCAAGACTAGCTACTTAATAAAAAGCCCCCGCCTTGCCGGGAGCGCTTCTTTCCTTCCC
Silene conica	2	cp	ATTCCTCTCTGGTGGTAGAAGGGC	16-8	Silene_conica_mito_34	31164	A>C	CCACCACTTTTGGGTGTCTTTGACCTCACTTACCCTTGTTTCAAGACTAGCTACTTAATAAAAAGCCCCCGCCTTGCCGGGAGCGCTTCTTTCCTTCCCGCCCCCTCTTGGTCGAGCCTTTCTCTCCCTTTCACTAAC
Silene conica	3	mt	AACAGACCAGTTTAGTACATGCCA[R2]	21-12	Silene_conica_mito_34	31164	A>C	GACCTCACTTACCCTTGTTTCAAGACTAGCTACTTAATAAAAAGCCCCCGCCTTGCCGGGAGCGCTTCTTTCCTTCCCGCCCCCTCTTGGTCGAGCCTTTCTCTCCCTTTCACTAACGCTCGACCTCGTAAAC
Silene conica	3	mt	CGATATATACTCCGGCAGGGCCCT[R2]	20-6	Silene_conica_mito_34	31164	A>C	TGTTTCAAGACTAGCTACTTAATAAAAAGCCCCCGCCTTGCCGGGAGCGCTTCTTTCCTTCCCGCCCCCTCTTGGTCGAGCCTTTCTCTCCCTTTCACTAACGCTCGACCTCGTAAACTCTCCTAGGCTTCAT
Silene conica	3	mt	CAGAACGACGACGGATCAAGGAGC[R1]	25-18	Silene_conica_mito_34	31164	A>C	AGAGCTTTCGCCTATATTAGAACAAACCCACCACTTTTGGGTGTCTTTGACCTCACTTACCCTTGTTTCAAGACTAGCTACTTAATAAAAAGCCCCCGCCTTGCCGGGAGCGCTTCTTTCCTTCCCGCCCCCT
Silene conica	3	mt	CCACAGCCTAGTCCCAGATACCAG[R2]	22-18	Silene_conica_mito_34	31164	A>C	CCTATATTAGAACAAACCCACCACTTTTGGGTGTCTTTGACCTCACTTACCCTTGTTTCAAGACTAGCTACTTAATAAAAAGCCCCCGCCTTGCCGGGAGCGCTTCTTTCCTTCCCGCCCCCTCTTGGTCGAG
Silene conica	3	mt	CGGTAGATATCCGAACATCCTCAA[R2]	27-9	Silene_conica_mito_34	31164	A>C	TCAAGACTAGCTACTTAATAAAAAGCCCCCGCCTTGCCGGGAGCGCTTCTTTCCTTCCCGCCCCCTCTTGGTCGAGCCTTTCTCTCCCTTTCACTAACGCTCGACCTCGTAAACTCTCCTAGGCTTCATACTT
Silene conica	1	mt	AACAAGAAAAAGGACGTGGCCGGA[R1]	16-13	Silene_conica_mito_34	51893	A>C	AAAGAATTAAGATCTGATGGACGAGCTGGAGTAAGGCAGGATTTCTACGCGCGAAGAGTCCGTGGAAAGCGGCCCTTAGATTTTTTAAGATGTTTGGGAACAAAAAAGAAGAGTAAAGCAAGAGGCGCTTCGC
Silene conica	1	mt	ACCTTAGGCCCAGAGATGCCGATG[R2]	22-11	Silene_conica_mito_34	64231	A>G	CTAGCCCCACACCGGTAAAGTCAGACATACAAAAAGGTAAAAAGCACAAAGAAAAGGTAGAGAAGCTTTTGTGAATACCCTCCCTTGGACTTTCAGCCCCGAGGCGTCCATCGGACCACATCTTTCATAAAAC
Silene conica	1	cp	CATCACACCTAACGGACCCCTCGA	18-15	Silene_conica_mito_34	83831	A>G	TGGAGCAGAGTTCTAGTCTTAATCCTCATACACCGGCCGTATTTAACCCCCTTCCTTAAAGACAGAACTTATACACGAGTAGTAGATCCACTGGAAAAGCGTCTTAAAGAAAAAGGAGCCGGGCAAAGTCTCCCGGTTGGTTGGCTTGAAAAGGGTCCTCTGTGCTT
Silene conica	1	mt	AAATAAAAACCTAACGACTGATCA[R2]	23-19	Silene_conica_mito_35	12846	A>T	AATGCTCGTAAAATCATTAAAAACTAGACAAGGAATCAAGACAATCTTAATAACGGCAGGTATTCTCTTCTTCTATCTATACAACTAACTATACAGAGATGTGAGACTATATAATTTTCTGAAGCACAGGACG
Silene conica	1	mt	AAGCATCGTGATAGAAGAGATTGC	11-9	Silene_conica_mito_35	12846	A>T	TCTTAATAACGGCAGGTATTCTCTTCTTCTATCTATACAACTAACTATACAGAGATGTGAGACTATATAATTTTCTGAAGCACAGGACGATTACGAACAAGAATTTAACAACTAACTTTCATAACATAAACAGGG
Silene conica	1	mt	AAGTTTAGAGTTTCGTTTTTGCCC[R1]	21-18	Silene_conica_mito_35	12846	A>T	CAATCTTAATAACGGCAGGTATTCTCTTCTTCTATCTATACAACTAACTATACAGAGATGTGAGACTATATAATTTTCTGAAGCACAGGACGATTACGAACAAGAATTTAACAACTAACTTTCATAACATAAA
Silene conica	1	mt	CCTCGTAGAACCTTGCACCGCCAC[R1]	15-14	Silene_conica_mito_35	12846	A>T	CGTAAAATCATTAAAAACTAGACAAGGAATCAAGACAATCTTAATAACGGCAGGTATTCTCTTCTTCTATCTATACAACTAACTATACAGAGATGTGAGACTATATAATTTTCTGAAGCACAGGACGATTACG
Silene conica	3	mt	CAATACAAATATCTGCCCGAATCA[R1]	19-10	Silene_conica_mito_35	12846	A>T	CATCCGCTTGATAATGTAATGCTCGTAAAATCATTAAAAACTAGACAAGGAATCAAGACAATCTTAATAACGGCAGGTATTCTCTTCTTCTATCTATACAACTAACTATACAGAGATGTGAGACTATATAATT
Silene conica	3	cp	CATCAAAAGGAACTTCTGACTTAA	18-12	Silene_conica_mito_35	77167	A>G	GTCGAGTCCCACTTAGGTCCTCCCCTTTAAGAAAAAGGATCGAGCGTAAAGAAGGAAGACCCAAGCGTATAAGTGCATCCCCCCTCTCTTAGAGAGTCTTCTTGCAGGAAAAAGGGGCAACCGCTGCTAGTTCTAATTCACTCAAAGGAAGTCTCGCTCCTTAAGTTAAGGCATGAAAGTTTTGCGAAAAGTATAGT
Silene conica	1	mt	AACATCAGTAAGGAGCCAGGTCCA[R2]	14-11	Silene_conica_mito_36	2949	A>G	TCGGCTTACAAGTAGAGTCATGTTATACCTCGACCAGAGGTTGGGGGGAAGGCGTAGACTGAGATACGAAGGAGAAGATAAGGCCGGCTCTCCCACAAGGGAGAAAAAGACTCTACCAAAGGAAGAAGGGACG
Silene conica	2	cp	CAGCACAACTCCTTTGACAACAAC[R2]	9-6	Silene_conica_mito_36	2949	A>G	CTTCTTAAGGAGAGGAGAAATAGGAGTTCGCCCGTAGGAGAGAGGCTCGGCTTACAAGTAGAGTCATGTTATACCTCGACCAGAGGTTGGGGGGAAGGCGTAGACTGAGATACGAAGGAGAAGATAAGGCCGG
Silene conica	3	cp	ACAACAAAGTAAGAACGATTATAA	9-8	Silene_conica_mito_36	2949	A>G	CCCGTAGGAGAGAGGCTCGGCTTACAAGTAGAGTCATGTTATACCTCGACCAGAGGTTGGGGGGAAGGCGTAGACTGAGATACGAAGGAGAAGATAAGGCCGGCTCTCCCACAAGGGAGAAAAAGACT
Silene conica	3	mt	AACCCGCCATTCTCTCACGAAGCC[R1]	15-10	Silene_conica_mito_36	46162	A>G	TAGCTTCATACATTTTTTTACTGCGATCCGAGAAGTCCCGCTTTTGCGGTCGAGCCTATACTATTCTATATTATAACTAGACTCTTTCGGGTCGACGAATCCATCTGGTGAATAGGGACGAAGGCTGGTTCGA
Silene conica	2	cp	CAAGGCCTGACCGAAATATGATTG[R1]	10-8	Silene_conica_mito_37	22521	A>G	ATTTACTTTATTAAGGCTTGGTCTATCTCCTCCCCCTCTCTACTCTACCTCCTCTCCCTTTGGTCGAGCCTTTCTCCTATGCAGTCGTCCGCCCGGGGTTATCTCCTCTCCTTGGCAGTCGAGCTATTTAACT
Silene conica	3	cp	ACTGAATTTCAAGAAACCACCAAG	11-9	Silene_conica_mito_37	22521	A>G	CTCTCGCTTTGCTCGAGCGATTTCATCTCCATTTCTGGCGGTACTCTTCTCGTAGACATTTACTTTATTAAGGCTTGGTCTATCTCCTCCCCCTCTCTACTCTACCTCCTCTC
Silene conica	3	mt	CTTAACACTACTTGTCTAACAAAA[R2]	17-15	Silene_conica_mito_37	22521	A>G	TCGAGCGATTTCATCTCCATTTCTGGCGGTACTCTTCTCGTAGACATTTACTTTATTAAGGCTTGGTCTATCTCCTCCCCCTCTCTACTCTACCTCCTCTCCCTTTGGTCGAGCCTTTCTCCTATGCAGTCGT
Silene conica	1	mt	CAGAGTCTGAAACGAAACAATGCC[R2]	17-12	Silene_conica_mito_37	42641	A>G	CCTCAAATTCACAAAGTAGGCCTAAAAGTGCTTTGAATCCATCAGGATTTGAACCACTTTATACGAAAGTTGCAATGTCAAGGTGACATATTTGGTTACCTTTTTCAGCTTCAGCAATTTGGAGAGTAAGAAT
Silene conica	1	mt	AACAAGAAGTCAGCGCTGAAGGTT	17-16	Silene_conica_mito_37	42641	A>G	TCTACGGAAACGGACCCACGGGCATAGCGAACGAGAAGTAAGATCAACCTCAAATTCACAAAGTAGGCCTAAAAGTGCTTTGAATCCATCAGGATTTGAACCACTTTATACGAAAGTTGCAATGTCAAGGTGACATATTTGGTTACCTTTTTCAGCTTCAGCAATTTGGAGAGTAAG
Silene conica	2	cp	ACGTCAACACATTCGCCCCCGGTC[R1]	16-16	Silene_conica_mito_37	42641	A>G	GAATCCATCAGGATTTGAACCACTTTATACGAAAGTTGCAATGTCAAGGTGACATATTTGGTTACCTTTTTCAGCTTCAGCAATTTGGAGAGTAAGAATCAGACTTTCTTTGGTAAGTGTATGGAGAGAAGTC
Silene conica	3	cp	AACACACTCATCCGAAAAAACTTA[R2]	14-6	Silene_conica_mito_37	42641	A>G	CCTAAAAGTGCTTTGAATCCATCAGGATTTGAACCACTTTATACGAAAGTTGCAATGTCAAGGTGACATATTTGGTTACCTTTTTCAGCTTCAGCAATTTGGAGAGTAAGAATCAGACTTTCTTTGGTAAGTG
Silene conica	3	cp	AACCAAAATCTTCGAGCTGTCCTA[R2]	8-7	Silene_conica_mito_37	42641	A>G	TAAGATCAACCTCAAATTCACAAAGTAGGCCTAAAAGTGCTTTGAATCCATCAGGATTTGAACCACTTTATACGAAAGTTGCAATGTCAAGGTGACATATTTGGTTACCTTTTTCAGCTTCAGCAATTTGGAG
Silene conica	3	cp	AAGTAAAAGCACCTTTAACACATA[R2]	10-6	Silene_conica_mito_37	42641	A>G	AAGATCAACCTCAAATTCACAAAGTAGGCCTAAAAGTGCTTTGAATCCATCAGGATTTGAACCACTTTATACGAAAGTTGCAATGTCAAGGTGACATATTTGGTTACCTTTTTCAGCTTCAGCAATTTGG
Silene conica	3	cp	ACGAATGCGCCCCCGCGCTATTTA	10-7	Silene_conica_mito_37	42641	A>G	CGGACCCACGGGCATAGCGAACGAGAAGTAAGATCAACCTCAAATTCACAAAGTAGGCCTAAAAGTGCTTTGAATCCATCAGGATTTGAACCACTTTATACGAAAGTTGCAATGTCAAGGTGACATATTTGGTTACCTTTTTCAGCTTCAGCAATTTGGAGAGTAAGAATCAGACTTTCTTTGGTAAGTG
Silene conica	3	cp	TAAACCGCGCTGTTATTCGGAGCA	20-10	Silene_conica_mito_37	42641	A>G	ATCCATCAGGATTTGAACCACTTTATACGAAAGTTGCAATGTCAAGGTGACATATTTGGTTACCTTTTTCAGCTTCAGCAATTTGGAGAGTAAGAATCAGACTTTCTTTGGTAAGTGTATGGAGAGAAGTCAAAGGTAGCAAAAAATGAGTATTCACTTTATCCTGTTGCAGACAAGAGAAGG
Silene conica	3	mt	CAACACCGACACCCACACCCCGCC	21-10	Silene_conica_mito_37	42641	A>G	GAAAGTTGCAATGTCAAGGTGACATATTTGGTTACCTTTTTCAGCTTCAGCAATTTGGAGAGTAAGAATCAGACTTTCTTTGGTAAGTGTATGGAGAGAAGTCAAAGGTAGCAAAAAATGAGTATTCACTTTATCCTGTTGCAGACAAGAGAAGGGTTGTTTTGGTCTAACTCTCCCTTACTTAGTCTTTGCCTTTTTTCG
Silene conica	3	mt	AAAAGATGAGTATCAGTGGGCCGC	17-11	Silene_conica_mito_37	42641	A>G	TCAACCTCAAATTCACAAAGTAGGCCTAAAAGTGCTTTGAATCCATCAGGATTTGAACCACTTTATACGAAAGTTGCAATGTCAAGGTGACATATTTGGTTACCTTTTTCAGCTTCAGCAATTTGGAGAGTAAGAATCAGACTTTCTTTGGTAAGTGTATGGAGAGAAGTCAAAGGTAGCAAAAAATGAGTATTCACTTTATCCTGTTGCAGACAAGAGAAGGGTTGTT
Silene conica	3	mt	AATCAGAGCTGTCGGGCCCCTATC	30-11	Silene_conica_mito_37	42641	A>G	AAGCTAGATATAGTAAGCAGAAGGTCAATGAATCTACGGAAACGGACCCACGGGCATAGCGAACGAGAAGTAAGATCAACCTCAAATTCACAAAGTAGGCCTAAAAGTGCTTTGAATCCATCAGGATTTGAACCACTTTATACGAAAGTTGCAATGTCAAGGTGACATATTTGGTTACCTTTTTCAGCTTCAGCAATTTGGAGAG
Silene conica	3	mt	CATCTCAAACTTTTGACTATACAT[R2]	24-22	Silene_conica_mito_37	42641	A>G	AAAGTGCTTTGAATCCATCAGGATTTGAACCACTTTATACGAAAGTTGCAATGTCAAGGTGACATATTTGGTTACCTTTTTCAGCTTCAGCAATTTGGAGAGTAAGAATCAGACTTTCTTTGGTAAGTGTATG
Silene conica	3	mt	CCCCAACCGATAGAGACATTGTAA	31-23	Silene_conica_mito_37	42641	A>G	AGAAGTAAGATCAACCTCAAATTCACAAAGTAGGCCTAAAAGTGCTTTGAATCCATCAGGATTTGAACCACTTTATACGAAAGTTGCAATGTCAAGGTGACATATTTGGTTACCTTTTTCAGCTTCAGCAATTTGGAGAGTAAGAATCAGACTTTCTTTGGTAAGTGTATGGAGAGAAGTCAAAGGTAGCAAAAAATGAGTATTCACTTTATCCTGTTGCAG
Silene conica	3	mt	CGCAAGCAATAAGTGGTGAAACTT[R1]	21-17	Silene_conica_mito_37	42641	A>G	AGCGAACGAGAAGTAAGATCAACCTCAAATTCACAAAGTAGGCCTAAAAGTGCTTTGAATCCATCAGGATTTGAACCACTTTATACGAAAGTTGCAATGTCAAGGTGACATATTTGGTTACCTTTTTCAGCTT
Silene conica	3	cp	AGACTACCAAGGTGAACGCATCGT[R1]	7-4	Silene_conica_mito_38	8164	A>G	TAGCAAGCATTCTTCTTAGGATAAGTTGAGTCGGAAGACCCTGTTTAGTCAAATTTGCCCAACTAGTCTAAGAAGCGGGGGGTTGGTCTGCAGGTAATGTGATTATACTGGGTTGATCGGACCCCTTCAG
Silene conica	3	cp	CACGGGGCCACTCGGATGGTTAAT	14-7	Silene_conica_mito_38	33472	C>T	TCTGAAAGGGTGCGCTCTTTCGAGACAGGTATCCACCATCCTATACAAAAGGGTCGGGATATACGCTGGTTGGTTCGGGGGTGGCGTCTTTATCCAATGCAGATGCTAATGATGAATAGATAGGGGAAGTTGGGTTAACAGCTTATACTCATAACTACTGAGCTTTTCTTGGATGAGAAAACTCCCCA
Silene conica	1	cp	CAATAGTCATTTCATCGTAGAGGA[R2]	22-20	Silene_conica_mito_38	36433	A>G	AAGGGAACCGGATGGACAAGTAAGCAACTAAAAAACTGAAAAGACTGGAGGATAAGTATAAAAGTGTTCTTGAACGCGCTACTAAGTACTAAGGCGGGAGGAGGCGCAAGCAAGGTCCTCTACTAGGTAGGGG
Silene conica	1	mt	GACAAGCCTCGCGTAATACTGCAA[R1]	16-11	Silene_conica_mito_38	36433	A>G	GTGAAAGTAGCACATTAAAGGGAACCGGATGGACAAGTAAGCAACTAAAAAACTGAAAAGACTGGAGGATAAGTATAAAAGTGTTCTTGAACGCGCTACTAAGTACTAAGGCGGGAGGAGGCGCAAGCAAGGT
Silene conica	2	cp	CCACGGAGACGCTAATGATGACAA	15-14	Silene_conica_mito_38	36433	A>G	CGGGAGGAGGCGCAAGCAAGGTCCTCTACTAGGTAGGGGCTTTGAGAAGCTACTCGAACGCTAGAGAGGCGCGCGCCCTTAGACTCGCCTGGCAAGGAGAAAGAGAAAAGACTCGGCTGAGGTATAAAGGAGACGGGAGAAGCTGGAAGAGGTCCCTTTGAGAGAAAAGAAATAGAAGAGATCCTGTGTGGATGGAGGCTTGGCTTGTATTAACCCCGCTGCTCTA
Silene conica	1	cp	ATCTCGCCTATCCTGAATCGGATA	23-23	Silene_conica_mito_38	53304	A>G	GAATCTTTTCTAGTGAAAAAGTAGAGAATGGGCAAGTAGAAGTAAGAATTAACAAAAAAGGAAAAGTGATCACTCCATCAAACAAGCTCCCTGAAAAAGAGAAGAAGGTAGCCGCCCGGCTGGCCCTTACATGAGAAGAAAAAAGAGAAAGAAAGCGCTCACACTGCGCTT
Silene conica	1	cp	ATGAAACATTGTGTCGGATCAGCT[R2]	19-18	Silene_conica_mito_38	53304	A>G	CTTTAAACTGTTTTTCCTCTTGAATCATTAGCCAGTTCCTAAAGAATCTTTTCTAGTGAAAAAGTAGAGAATGGGCAAGTAGAAGTAAGAATTAACAAAAAAGGAAAAGTGATCACTCCATCAAACAAGCTCC
Silene conica	1	mt	ACTGGATGTCGAATCTATTTTTAA[R2]	8-5	Silene_conica_mito_38	53304	A>G	TTCTAGTGAAAAAGTAGAGAATGGGCAAGTAGAAGTAAGAATTAACAAAAAAGGAAAAGTGATCACTCCATCAAACAAGCTCCCTGAAAAAGAGAAGAAGGTAGCCGCCCGGCTGGCCCTTACATGAGAAGAA
Silene conica	1	mt	AGCTGGACTTTAATCTAAAAAAAA	17-10	Silene_conica_mito_38	53304	A>G	TAAGGTATCAATAGCGAAAAGGTTTCTTTAAACTGTTTTTCCTCTTGAATCATTAGCCAGTTCCTAAAGAATCTTTTCTAGTGAAAAAGTAGAGAATGGGCAAGTAGAAGTAAGAATTAACAAAAAAGGAAAAGT
Silene conica	1	mt	ATTAGATTTAACCATCCGCCAAAT	11-10	Silene_conica_mito_38	53304	A>G	AAAAGGTTTCTTTAAACTGTTTTTCCTCTTGAATCATTAGCCAGTTCCTAAAGAATCTTTTCTAGTGAAAAAGTAGAGAATGGGCAAGTAGAAGTAAGAATTAACAAAAAAGGAAAAGTGATCACTCCATCAAACAAGCTCCCTGAAAAAGAGAAG
Silene conica	1	mt	CATATGGAGGCATACTTAATCTAA[R2]	10-5	Silene_conica_mito_38	53304	A>G	AATCTTTTCTAGTGAAAAAGTAGAGAATGGGCAAGTAGAAGTAAGAATTAACAAAAAAGGAAAAGTGATCACTCCATCAAACAAGCTCCCTGAAAAAGAGAAGAAGGTAGCCGCCCGGCTGGCCCTTACATGA
Silene conica	2	cp	ACTCTTTCAAGGCCATAGGTAAAC	22-3	Silene_conica_mito_38	74629	A>G	TGCCTCAAAGGAAGATAAGAGAGTTAGACTTTAATCGTCGTTGTTTACGAGTCTTCAAAGCCGCGATTTTCTGGAACAAAGCCGGGGAGGTCAGATGCAGGGCTTGCTTAGGTAGATTTTTTCATCTGCGTACTCATTCTGTTGATACTTGCTTCTCCTATACGATGTGCCCGTAGACCCTCTCCCCTCTTAGCCCGCGAGCGCCCTAAACG
Silene conica	1	cp	CAGTAGGGGTAGGATTGACAATAC	22-12	Silene_conica_mito_39	46043	A>G	AAGGTACAGGGGTAGTGTAATTTGGGCTCAAGCCGCCTGTGGTAAAGCGCTTTCTGGCAAAGCTTCCTCCGGTTATTCAGTAGGTCTTCCTCGCCCACTACCAGTGGCGTTCCAAGTGAACTTTTCTTTTAGAGTTTGTACGCAGCAAGCATTAAGTAGAGAAGGAGATAAAGTAGAAGGGACAATCGAAGA
Silene conica	3	mt	AACGAGGAGAAATGACCCCTACTT	10-8	Silene_conica_mito_39	49537	A>T	TCTCAAGTTGGGGTTGGAATACAGCAGAGACCTCTTAAATAAACCTCGATAACACAGGAGAAAGCGTCTCCGACTTCTCCCGGTCTTTTCATTAGAAAAAAAGCCTTAGAGTTAGTTAGCTAATGAGTTAGATTTCCACGCGAGGTCCCATTTAAAGTCTACTTCACCACAGGCAGCAGCATAGGGAGCTTCTAGGTAAACTCTTATATAGTAAGTAG
Silene conica	1	cp	AAACACACCAGCTAAAAGTCGAGC	23-19	Silene_conica_mito_4	12283	A>G	AGAAGCTCTCCCAATTAAAAGGATTGCGCCAAGATAGAAATACCGCTCTTCTTTTTCTATGGAGCGGCGCGCCACAAGATCGAAGGGTTGACCTTGGTAAAATCATACATTTTTGCACCCACCTAAATCTAAAGAGGGAAAGGCTCGGTGGGATTATAGAGAGAGTGACTGGACCGGATCCCTCTTATTATACAGTGAAGGCGA
Silene conica	1	cp	AACAGCCGTCCGCCAGGCATATAA	23-13	Silene_conica_mito_4	12283	A>G	CTAGGCATAGCGCCCTGCCCAGGCGAAGTTGAACTTCCTTCCCTTTGATCGACCAGCAAAGAAGCTCTCCCAATTAAAAGGATTGCGCCAAGATAGAAATACCGCTCTTCTTTTTCTATGGAG
Silene conica	1	cp	CCGTTTAACAATGAACGCCGCGAA[R2]	26-23	Silene_conica_mito_4	12283	A>G	TAGCGCCCTGCCCAGGCGAAGTTGAACTTCCTTCCCTTTGATCGACCAGCAAAGAAGCTCTCCCAATTAAAAGGATTGCGCCAAGATAGAAATACCGCTCTTCTTTTTCTATGGAGCGGCGCGCCACAAGATC
Silene conica	1	cp	CGATCCCGGGAAGTGGACGTACAT	30-30	Silene_conica_mito_4	12283	A>G	AGTTTCTTCAAATTCATCATACTCATCTGCAATGTGACAACTCTAGGAGTCTTCTTTTTTACTAGGCATAGCGCCCTGCCCAGGCGAAGTTGAACTTCCTTCCCTTTGATCGACCAGCAAAGAAGCTCTCCCAATTAAAAGGATTGCGCCAAGATAGAAATACCGCTCTTCTTTTTCTATGGAGCGGCGCGCCACAAGATCGAAGGGTTGACCTTGGTAAAA
Silene conica	1	mt	GAGAACAACCATTGTAGATAGCAC[R1]	23-17	Silene_conica_mito_4	12283	A>G	TCTTCTTTTTTACTAGGCATAGCGCCCTGCCCAGGCGAAGTTGAACTTCCTTCCCTTTGATCGACCAGCAAAGAAGCTCTCCCAATTAAAAGGATTGCGCCAAGATAGAAATACCGCTCTTCTTTTTCTATGG
Silene conica	1	mt	AGCGCTCTTCCATGCACTGCCATC	24-14	Silene_conica_mito_4	12283	A>G	CATTACTTCTTTCTTGCTTGAAATAGCTTCGTCTAATGCAGACTAGTTTCTTCAAATTCATCATACTCATCTGCAATGTGACAACTCTAGGAGTCTTCTTTTTTACTAGGCATAGCGCCCTGCCCAGGCGAAGTTGAACTTCCTTCCCTTTGATCGACCAGCAAAGAAGCTCTCCCAATTAAAAGGATTGCGCCAAGATAGAAATACCG
Silene conica	2	cp	CACTCGCCATGTCTTAAACGTAAA[R2]	16-5	Silene_conica_mito_4	12283	A>G	GGCGAAGTTGAACTTCCTTCCCTTTGATCGACCAGCAAAGAAGCTCTCCCAATTAAAAGGATTGCGCCAAGATAGAAATACCGCTCTTCTTTTTCTATGGAGCGGCGCGCCACAAGATCGAAGGGTTGACCTT
Silene conica	3	cp	CAAACGCTGCGTTCTCACCAAAAA	15-11	Silene_conica_mito_4	12283	A>G	CGAGTAACCTCCCATTACTTCTTTCTTGCTTGAAATAGCTTCGTCTAATGCAGACTAGTTTCTTCAAATTCATCATACTCATCTGCAATGTGACAACTCTAGGAGTCTTCTTTTTTACTAGGCATAGCGCCCTGCCCAGGCGAAGTTGAACTTCCTTCCCTTTGATCGACCAGCAAAGAAGCTCTCCCAATTAAAAGGATTGCGCCAAGATAGAAATACCGCTCTTCTT
Silene conica	3	mt	AAAAATAAGTACGACAATACTCAA	21-10	Silene_conica_mito_4	12283	A>G	ATAGCGCCCTGCCCAGGCGAAGTTGAACTTCCTTCCCTTTGATCGACCAGCAAAGAAGCTCTCCCAATTAAAAGGATTGCGCCAAGATAGAAATACCGCTCTTCTTTTTCTATGGAGCGGCGCGCCACAAGATCGAAGGGTTGACCTTGGTAAAATCATACATTTTTGCACCCACCTAAATCTAAAGAGGGAAAGGCTCGGTGGGATTATAGAGAGAGTGACTG
Silene conica	3	mt	AAATGATATACCCAGCGAAGTACG	14-12	Silene_conica_mito_4	12283	A>G	AGGAGTCTTCTTTTTTACTAGGCATAGCGCCCTGCCCAGGCGAAGTTGAACTTCCTTCCCTTTGATCGACCAGCAAAGAAGCTCTCCCAATTAAAAGGATTGCGCCAAGATAGAAATACCGCTCTTCTTTTTCTATGGAGCGGCGCGCCACAAGATCGAAGGGTTGACCTTGGTAAAATCATAC
Silene conica	3	mt	AATCGTGGCATTCCTCCCAATCAA	19-9	Silene_conica_mito_4	12283	A>G	GCGCCCTGCCCAGGCGAAGTTGAACTTCCTTCCCTTTGATCGACCAGCAAAGAAGCTCTCCCAATTAAAAGGATTGCGCCAAGATAGAAATACCGCTCTTCTTTTTCTATGGAGCGGCGCGCCACAAGATCGAAGGGTTGACCTTGGTAAAATCATACATTTTTGCACCCACCTA
Silene conica	3	mt	GAACAGGAGGCTTCCTCAGACTAC[R2]	15-14	Silene_conica_mito_4	12283	A>G	CCCTTTGATCGACCAGCAAAGAAGCTCTCCCAATTAAAAGGATTGCGCCAAGATAGAAATACCGCTCTTCTTTTTCTATGGAGCGGCGCGCCACAAGATCGAAGGGTTGACCTTGGTAAAATCATACATTTTT
Silene conica	1	mt	CGTCAATTAAAGTATTACTTCCAA	13-11	Silene_conica_mito_4	12695	A>T	CATTTAGCACAAAGAGCTCCTGTTTTCAATTTAAGACCTTTGTCACTGACACAGGGTTCCTCCTCGAGTAGGTAGGATTAGCCGTTGCTTGAGCTACCGCTTTCCTTATTAGAGCAGAATAACCATCTTTTCATTTTTATCATATTGGAGCTATCCCTTTTCTATATAA
Silene conica	1	mt	CACGCATATTGCTTCTCGGCCTCT	19-18	Silene_conica_mito_4	12695	A>T	TTTTCATTTTTATCATATTGGAGCTATCCCTTTTCTATATAATTCCAGTTTTAAGTATAACTGCCATAGATATGCTCTTACATTATTTTAGTAGTTATTGTGCGCCATATGCTTTGGTGGGACCTTTCCCATTGCTTTGTGCGAAAAGTAAAATAAAGATCTC
Silene conica	1	mt	CCTCTGAATGGGGGGAGCAAATCG	18-11	Silene_conica_mito_4	12695	A>T	TAGCCGTTGCTTGAGCTACCGCTTTCCTTATTAGAGCAGAATAACCATCTTTTCATTTTTATCATATTGGAGCTATCCCTTTTCTATATAATTCCAGTTTTAAGTATAACTGCCATAGATATGCTCTTACATTATTTTAGTAGTTATTGTGCGCCATATGCTTTGGTGGGACCTTTCCCATTGCTTTGTGCGAAAAGTAAAATAAAGATCTCAAGTCGACTTCATCTCTAATTGTAG
Silene conica	3	mt	CGCACGATAGAAGCCCTCTCTATG[R2]	14-12	Silene_conica_mito_4	12695	A>T	ATCTTTTCATTTTTATCATATTGGAGCTATCCCTTTTCTATATAATTCCAGTTTTAAGTATAACTGCCATAGATATGCTCTTACATTATTTTAGTAGTTATTGTGCGCCATATGCTTTGGTGGGACCTTTCCC
Silene conica	3	cp	ACCCCGGATCCCGGTACACGTGCA	14-11	Silene_conica_mito_4	44450	A>G	TCAGTATTTGCTTTGGCTCTAAATGCTCCTCTTGCGCGCTTTCCCCATTTAAGAAAGAAAGAGCAGCCCCTTACGGGGCACGACTTATTGCGACTCAGTTTCGACAACCAATCAAGTAGAAGAATTTT
Silene conica	2	cp	CAGCCGGTAGAATGCCATTTCGCC	17-15	Silene_conica_mito_4	73101	A>T	AAGATTCTACGGAATCGATATAAAGAAGTAGTTTCTCTGCCCCAATGCCCCTATGTGATAGGTGGTTAACTCTTCCTATTGCTAATATCGCGCAATAGAACTAAGGATATAGGTCTTACGGCTGCCTTTCAATCCCCATCTTCTTTCTATAGGAACACTCTGTCTTGGTCTAATAAGAAACGGGCACATCATAGCAAGATGGAT
Silene conica	1	mt	GGCGCCCCTGCCTCGGTGCATAAA[R1]	16-12	Silene_conica_mito_4	93888	A>C	CTACAACCTTTATTCGGACGGTTTGGAGTCGACTCTAGATTCTTTGGAAACTACCGGCGCTAGATCTAGTCACAGACTCAAGAAAAAAGAAAAGAAGCACAAAGTAAACTTTAAGGAGGGGGTGACCATCTAA
Silene conica	3	cp	AAAACTTAAGCTACTCCGACGCAC[R1]	15-12	Silene_conica_mito_4	93888	A>C	GAGCTACTCTTAAGAAATCGCTTGCTCTTTGTCCCTTGGCACGTCTTCTACTACAACCTTTATTCGGACGGTTTGGAGTCGACTCTAGATTCTTTGGAAACTACCGGCGCTAGATCTAGTCACAGACTCA
Silene conica	1	mt	CTCCACCCTCAACTGGCAAAGTCC	22-6	Silene_conica_mito_4	121816	C>T	GTGATGAGGTTTAGATAGCTCGACTTCAGTATTAAGTAGAGTGCTCATTCTTGTGTTTTCTGCGCTGCTCTCTTTCTCGTAAAAGAAGCGAGGTAACGAGGTGGACTTCCAAGTTGTAGAATCGACAAAAGAAAGGTAAAGCAAGGCATTTCAACAACCTTCTTTTTCTCGCTGAGTCAATAGAA
Silene conica	1	mt	CCTACATTAAGTGTTCCGGCTGTA[R1]	24-10	Silene_conica_mito_40	26843	A>G	ATCGAGTGAATACAATGAGGAGAGAGCCCTAAGCAGTACTTGGTCGTTTAGTGAGAGGGGAAGGAAAGCCCTACTTATTTTCATTTCTTATGCTTTACCCGTTATGGCACACCCCTAAAAGAATTTTTTAGGA
Silene conica	1	mt	GAGCCGCAATTCTTCCTTCATCTT[R2]	11-5	Silene_conica_mito_40	26843	A>G	TTGGTCGTTTAGTGAGAGGGGAAGGAAAGCCCTACTTATTTTCATTTCTTATGCTTTACCCGTTATGGCACACCCCTAAAAGAATTTTTTAGGATATTCGCCCTGACTGAAGAAAGGCTGGCAAGGAAAGAGG
Silene conica	1	mt	TAAAGACATACCTGAGCTGACACT[R2]	16-14	Silene_conica_mito_40	26843	A>G	GGGGAAGGAAAGCCCTACTTATTTTCATTTCTTATGCTTTACCCGTTATGGCACACCCCTAAAAGAATTTTTTAGGATATTCGCCCTGACTGAAGAAAGGCTGGCAAGGAAAGAGGGCACCTAGTTTATTTGA
Silene conica	2	cp	AAATTCAGCTAACCTCAGACTGAT	17-8	Silene_conica_mito_40	26843	A>G	AAGAGTACCGCCAAGAGTTAGTAAAGACTAAAAGAAAAGGGGAGGTTCTGGAAGAAGCTGGACTGTTAAAGAAAGGAGAGAGAAATGAGTAGAATATGAGAAGAGATCGAGTGAATACAATGAGGAGAGAGCCCTAAGCAGTACTTGGTCGTTTAGTGAGAGGGGAAGGAAAGCCCTACTTATTTTCATTTCTT
Silene conica	2	cp	ATACCGCGTTAAGAAAGGGAAAAG[R1]	18-11	Silene_conica_mito_40	26843	A>G	GAGGGGAAGGAAAGCCCTACTTATTTTCATTTCTTATGCTTTACCCGTTATGGCACACCCCTAAAAGAATTTTTTAGGATATTCGCCCTGACTGAAGAAAGGCTGGCAAGGAAAGAGGGCACCTAGTTTATTT
Silene conica	3	cp	ACAAATGCATTAATATAGACATCG	13-8	Silene_conica_mito_40	26843	A>G	GAGAGCCCTAAGCAGTACTTGGTCGTTTAGTGAGAGGGGAAGGAAAGCCCTACTTATTTTCATTTCTTATGCTTTACCCGTTATGGCACACCCCTAAAAGAATTTTTTAGGATATTCGCCCTGACTGAAGAAAGGCTGGCAAGGAA
Silene conica	3	mt	ACGCAACGTACACCTCAAGCGTAC	15-11	Silene_conica_mito_40	81444	A>C	AAGGGAAAAGTAGAAAATGTCGAAGGATGGGCGCTTAATTCTTTTACAATTAATACAGTAAGTAGGTCTGAGTAAAAAAGTCCAGGAATAGCTAGTAGCCCACTAGCAGTTAAATTCTACTGAGGAAAGGTGTTAACGGGATCAAGCTCTTAAACG
Silene conica	2	cp	CCCTCGGAGATTGGTGGTCGCCAC[R2]	11-5	Silene_conica_mito_41	10059	A>G	CTTTCATCACCTTTTAGGCCCTCTCACTATCGAGCGAGTCCCATTGTATGGTCGTTACCACTCGAGTCTCATTTCTTTCTCCTTCTAGCCGAGCCTTCTCCTCTACTTAGCAGGCGAGGTTAAATCCTC
Silene conica	1	cp	ACCCAGCCTACGCTAATGCGTTTT	26-25	Silene_conica_mito_41	17075	A>G	AGCCAAAGAAAAAAACACATGACCAGAAGAATTGAGTAAAATATGTGAATTGATCGAGTTGGGGCGTATTAAAATTTGCTTTTATTTATAGACCCTCGCTCTCGCTCGAGGCGAGTCAGTCGACTTTTAGTAATTGTTAAAATCAGCAGCATACCAAAAAATTAAGGCGCATAAATTTCAGAGCGGTAGGTA
Silene conica	1	cp	AACTAGCAACTACCTAAGACTAAG[R1]	28-21	Silene_conica_mito_41	17075	A>G	AATATGTGAATTGATCGAGTTGGGGCGTATTAAAATTTGCTTTTATTTATAGACCCTCGCTCTCGCTCGAGGCGAGTCAGTCGACTTTTAGTAATTGTTAAAATCAGCAGCATACCAAAAAATTAAGGCGCAT
Silene conica	3	mt	GCCGGGCGTGGGGTCCGCCACTAA	8-8	Silene_conica_mito_41	17075	A>G	AGCCATCTCTATCATTGCATATTAGCACATAAAAGCCAAAGAAAAAAACACATGACCAGAAGAATTGAGTAAAATATGTGAATTGATCGAGTTGGGGCGTATTAAAATTTGCTTTTATTTATAGACCCTCGCTCTCGCTCGAGGCGAGTCAGTCGACTTTTAGTAATTGTTAAAATCAG
Silene conica	1	cp	CAGTTGGACGTTGATAACTAGTAG	21-15	Silene_conica_mito_41	17649	A>G	CAGAATATATTAAAGAAATTCTCGAAATCAAGAGCGCGCGGCACACTTTCTAGATCTATATACTTTCGAAATCGATAAAAAAAGAAAAACAAGGAAAAAGAAGAAGAACAGCGAGAAAAGCACAACTAAGATTAGACACCACGCTCGTGAAAAGCCGAGTCAATTGCTATTAACTTTATATACTA
Silene conica	1	mt	CTATAAACGATCCTCTACTTTGAC	17-10	Silene_conica_mito_41	17649	A>G	ATTCTCGAAATCAAGAGCGCGCGGCACACTTTCTAGATCTATATACTTTCGAAATCGATAAAAAAAGAAAAACAAGGAAAAAGAAGAAGAACAGCGAGAAAAGCACAACTAAGATTAGACACCACGCTCGTGAAAAGCCGAGTCAATTGCTATTAACTTTATATACTAAGAAACTA
Silene conica	3	cp	GACGGCAATTCGGTAACAGAATTT[R2]	8-6	Silene_conica_mito_41	17649	A>G	GTAAGGAAGAACCGCGAGAAAAGCATACTCAGTTACAATACCGAGAATCAGAATATATTAAAGAAATTCTCGAAATCAAGAGCGCGCGGCACACTTTCTAGATCTATATACTTTCGAAATCGATAAAAAAAGA
Silene conica	1	cp	CACCCTTATAGGTCCCACTTGACT[R2]	22-21	Silene_conica_mito_41	17880	A>G	TCGTGAAAAGCCGAGTCAATTGCTATTAACTTTATATACTAAGAAACTAATTACAAAAACTAAGCTAAAAGAGACTCCAAGTCATAGCATAGCGGCTACAAACTCGAGAGAAAAACAGAGGGAAAACTTGACA
Silene conica	1	mt	GTTGAAACCAAATTCGATACCAGA[R1]	20-19	Silene_conica_mito_41	17880	A>G	AGTCATAGCATAGCGGCTACAAACTCGAGAGAAAAACAGAGGGAAAACTTGACAAAGAAAAAGGAATGAGATCGGACTGCCTCCCAATTTTGCATGAAAGAATGTCTACCTGACGCTTTCTTTGAAGTCTTCT
Silene conica	1	mt	ACTTTTAATATTTGAATGGCAGAA[R2]	16-15	Silene_conica_mito_41	94250	A>C	CCTTGGGTTTCAAACATATAAGGTGAATCACCTCTACTCCGAGTGTCCAGTTCTCCACCCGGAGTAGAGGAACCCGTCTTCCTGGAATAAAACAAAAAGAAGTTGTCAAGCCGCCTATTTAATTTAAGATCTT
Silene conica	2	cp	GGGTTTATACGATCCCCCCCATGG[R1]	16-8	Silene_conica_mito_41	94250	A>C	AAAAGAATAATTTAGCCAAGAGCATCCCTTGGGTTTCAAACATATAAGGTGAATCACCTCTACTCCGAGTGTCCAGTTCTCCACCCGGAGTAGAGGAACCCGTCTTCCTGGAATAAAACAAAAAGAAGTTGTC
Silene conica	3	cp	CAGAACTGGCTATGTAACTAGACA[R1]	10-9	Silene_conica_mito_41	94250	A>C	GAGCATCCCTTGGGTTTCAAACATATAAGGTGAATCACCTCTACTCCGAGTGTCCAGTTCTCCACCCGGAGTAGAGGAACCCGTCTTCCTGGAATAAAACAAAAAGAAGTTGTCAAGCCGCCTATTTAATTTA
Silene conica	3	mt	ACGCCTCCTCGATATAATTGGCCG[R1]	16-13	Silene_conica_mito_41	94250	A>C	AAGAATAATTTAGCCAAGAGCATCCCTTGGGTTTCAAACATATAAGGTGAATCACCTCTACTCCGAGTGTCCAGTTCTCCACCCGGAGTAGAGGAACCCGTCTTCCTGGAATAAAACAAAAAGAAGTTGTCAA
Silene conica	3	cp	AATTATTGAGTCGGACATCCATAC[R1]	17-9	Silene_conica_mito_42	355	C>G	TCGTCCCGACTTTGCTCTTTAACTAAAGTATAAAACTGATCAATAGAACTGTATTTGACCCGAGAGCTTCAATACCTCCCTCTATATGTTATTCTAGTTAGTTATAGGAACTTAGAATTAATTCTTGTCGCTG
Silene conica	3	mt	AACTCGGAATGAGAGGCAGAAAAT	22-15	Silene_conica_mito_42	1691	A>G	AGCAAGGGTTTTTCTTTTTATCTTTTTCCAAAGGGGGTAGGAAGAAAGGGTAGACGAAGGATCCATCCCCCTTTTTGCTTCTCTGGGGCATTCGTCGCCAAAACAACAAACAAGACATTTTCAGCGGCCATCTCTTTCTAAGAAAACCTTGAGTAGGTGCCTCT
Silene conica	3	mt	ATGAGAACCCCGGTCTTGAATCAC	24-24	Silene_conica_mito_42	11783	A>G	TGCGAACTGGGAAAAGCATCGTTCATAAGTTCACTCAAAGTCCATTTCTCTGAGATTGCCTTACTTTCTTTGTCGTCAGCTTTGTTCATATTTGTTTTTGAATACAGAGGGATTCTCTTTTCTACCCTAGCTTCAGCTAGCTGGTTCCAACCATCGGCTTTAGCCTGTGGATCTGAAGCAGCATCGATTACACCCGTCTTCAATTGAAAAAACCTTT
Silene conica	1	cp	ACATTCTCGAGCTATCAAGACTCA	19-17	Silene_conica_mito_42	17319	A>G	CTTGGTCAGCATCTTCCACACATCCTGAAAATAAGGAGAACTTGACTTGAAAGAAAAGGAAGACTGCTTTTGCTTTGTATTTCACGCTGCCTCGATTTACCATGTATGACTACATGAAGTTAGGGCGAGTACTTGACAGCGCATATTGTTGAGGGTA
Silene conica	3	cp	CTTTTGTTTAAATTAAAGAATCAC[R2]	13-6	Silene_conica_mito_42	75841	A>T	CTTACTTCTTCGAAAATCCTCAGCTTATTAAGTCTTTCCTTCTTTCTTTTAAAGATCATAAATTAATGGGAATTCTCTAGCAGCTTCAAAGACTAGAAAGAAGTCTCCTCTGAACGCACTCTTCGAGAGGAAA
Silene conica	1	mt	AAATTACCCACAGTACCAACTAAA	12-11	Silene_conica_mito_43	15245	A>G	CCTATGCTTACCCAGAGACCCCACCTTATCCCTCCTCAACTTCGTATTCTTATTCCTAAAGGTACCCATCTGCGTATTCCTCTGCCTTTCTTGTGTATTCTGAAGCCTCTTCTTGACCTTACGAACGGAGCCTGATCCCATCTTCTTAGCCTTCGATGACTTCTTCTG
Silene conica	1	cp	CCTCGCGGGCCTCGCAGGACAGAT	19-16	Silene_conica_mito_43	18450	A>G	TTCGTATTCTTTCAGTTCTAAGTATACCTCTTGGGAAGACTCCCCATCTGCATCTTTTCTTTTATATTCTTCGTCTCTTGGTTAAGCTTCCTTTGTTTGAGGTTTTCTAGTTTAATTAAGCCGAGGCTTTAAATGCTCGACCAATCGGGATAGGGGAGGGT
Silene conica	1	cp	AAGAGCTCTACACACACTCCCCAA	22-22	Silene_conica_mito_43	18450	A>G	CCTCGTATGCTGCTTCCTAAGGGGACTCGTCATCTTATTCGTATTCTTTCAGTTCTAAGTATACCTCTTGGGAAGACTCCCCATCTGCATCTTTTCTTTTATATTCTTCGTCTCTTGGTTAAGCTTCCTTTGTTTGAGGTTTTCTAGTTTAA
Silene conica	1	mt	ACTCACGGAGCATAAATCTGCAGA[R1]	18-18	Silene_conica_mito_43	18450	A>G	ATTCGTATTCTTTCAGTTCTAAGTATACCTCTTGGGAAGACTCCCCATCTGCATCTTTTCTTTTATATTCTTCGTCTCTTGGTTAAGCTTCCTTTGTTTGAGGTTTTCTAGTTTAATTAAGCCGAGGCTTTAA
Silene conica	3	cp	GTGACCAAGAAATATAGGGATAAC[R1]	6-6	Silene_conica_mito_43	18450	A>G	TAAGGGGACTCGTCATCTTATTCGTATTCTTTCAGTTCTAAGTATACCTCTTGGGAAGACTCCCCATCTGCATCTTTTCTTTTATATTCTTCGTCTCTTGGTTAAGCTTCCTTTGTTTGAGGTTTTCTAGTTT
Silene conica	3	mt	AAGCCGGGTGTCGCTCCCAAAGTT[R1]	21-15	Silene_conica_mito_43	18450	A>G	TATACCTCTTGGGAAGACTCCCCATCTGCATCTTTTCTTTTATATTCTTCGTCTCTTGGTTAAGCTTCCTTTGTTTGAGGTTTTCTAGTTTAATTAAGCCGAGGCTTTAAATGCTCGACCAATCGGGATAGGG
Silene conica	3	mt	ATTGTGATTCGACCCTGGGCCGCC	31-26	Silene_conica_mito_43	18450	A>G	CTTTTCTTTTATATTCTTCGTCTCTTGGTTAAGCTTCCTTTGTTTGAGGTTTTCTAGTTTAATTAAGCCGAGGCTTTAAATGCTCGACCAATCGGGATAGGGGAGGGTGCGAAGTGGGCTCGAACGCTAGTGAGAGGAGAAAGAGAAAAGAGTTCATACGAGAG
Silene conica	3	mt	CCCATGTAAGTGTGTGCGACGATC	27-13	Silene_conica_mito_43	18450	A>G	CATCTTTTCTTTTATATTCTTCGTCTCTTGGTTAAGCTTCCTTTGTTTGAGGTTTTCTAGTTTAATTAAGCCGAGGCTTTAAATGCTCGACCAATCGGGATAGGGGAGGGTGCGAAGTGGGCTCGAACGCTAGTGAGAGGAGAAA
Silene conica	3	mt	AGCAGGATGTCTTGTAACATAACC	22-15	Silene_conica_mito_43	18450	A>G	CCCTCTTCTGCTTGTTGGAAAGGGTACCCATCTTATTCCGATTCTTGCGTAGAGAGCCCCTCTTTTTCCTCGTATGCTGCTTCCTAAGGGGACTCGTCATCTTATTCGTATTCTTTCAGTTCTAAGTATACCTCTTGGGAAGACTCCCCATCTGCATCTTTTCTTTTATATTCTTCGTCTCTTGGTTAAGCTTCCTT
Silene conica	2	cp	AGGCATTAAAGTCCCCCAATTAAT	6-4	Silene_conica_mito_43	21067	A>C	AAAAGGCCCAGCAGCTCCCACTTAACCTAACTCAATCACCAGCTCTGGCACGGAAAACTTTGGGCTCTTTCCTTTCACTTTGCTTGGACTTGGCTTAGCTTTTATTAAGCGTCCACCGCGCATATCTAATTGGGGATAACCCGCTTTCTCTTCTCTTTTTCCTTTTCT
Silene conica	3	mt	AAGTCCCAACTAACTAGAGTTCGA[R2]	24-16	Silene_conica_mito_43	38864	A>G	TAAAGGCTTCTTCTAAGACCTGTTGGAATCATTTGCCAAAACAAGGTTTTTCTCCTTTACAGTTGAGCTCCTTCCAGGGTATCTCCTCAACTTAACAGCTGAGCCTTTCTCCTTCATGCTGAAGCCGAGCTAT
Silene conica	1	mt	CCGTTAATACCGGCTAGTTTGCTT[R2]	11-9	Silene_conica_mito_43	59335	A>C	TTATCTTAGCACTCACCCCTGCCTCTCATAGGAATTTCTTCGGACCCTCTGAGATTATATATGAGGGGGCTTTTTTCCTAGGCTTTACTCTAGTTACTTGTGAAACCGGGCGTATCTAATTGATGTGTGTGAA
Silene conica	1	cp	AGTCGCAAACACCGACCCCCTGAC[R2]	24-23	Silene_conica_mito_44	417	A>G	TCTCTTTATGGAATTCCAGTCAGCCCACCCAGCTTCTCCCTTTCAGTCTCTACTCTCTCTCCTCCCCGTATGAGAGGTTCAACCAACATATGACAAAGAAGCTCTCTTAACACATACGCCTCGCCCCATATAA
Silene conica	1	mt	ATATCGATTGATCTTGGGACGAAG[R2]	21-19	Silene_conica_mito_44	417	A>G	TTTCTTACTCTGCTTTTCTCTTTATGGAATTCCAGTCAGCCCACCCAGCTTCTCCCTTTCAGTCTCTACTCTCTCTCCTCCCCGTATGAGAGGTTCAACCAACATATGACAAAGAAGCTCTCTTAACACATAC
Silene conica	1	mt	ATCAAATCCCAGCGCCCCACACCC	15-15	Silene_conica_mito_44	417	A>G	TAGGGAGCCTTCCCAAGCAGAAGAAGCAGCCGAGGCACTGAATGATTAACAAGAGGTGGTTTACCAAGTGATACGACTAAGAAGGGCCCAGCACTCGTTACATTCTTACTTTACTTGTCCCTTTTCTTACTCTGCTTTTCTCTTTATGGAATTCCAGTCAGCCCACCCAGCTTCTCCCTTTCAGTCTCTACTCTCTCTCCTCCCC
Silene conica	1	mt	CAATCTCCAAATTCAGCGTTGAAG	22-18	Silene_conica_mito_44	417	A>G	ACGACTAAGAAGGGCCCAGCACTCGTTACATTCTTACTTTACTTGTCCCTTTTCTTACTCTGCTTTTCTCTTTATGGAATTCCAGTCAGCCCACCCAGCTTCTCCCTTTCAGTCTCTACTCTCTCTCCTCCCCGTATGAGAGGTTCAACCAACATATGACAAAGAAGCTCTCTTAACACATACGCCTCGCCCCATATAAAAGGGAGGGT
Silene conica	1	mt	CCCTAGTTTTGATAAGCAAGATAA	24-21	Silene_conica_mito_44	417	A>G	TTTTTCCTTCGCAAGACGCGCAAGATAGGGAGCCTTCCCAAGCAGAAGAAGCAGCCGAGGCACTGAATGATTAACAAGAGGTGGTTTACCAAGTGATACGACTAAGAAGGGCCCAGCACTCGTTACATTCTTACTTTACTTGTCCCTTTTCTTACTCTGCTTTTCTCTTTATGGAATTCCAGTCAGCCCACCCAGCTTCTCCCTTTCAGTCT
Silene conica	1	mt	CGCGACGGCTACGGCCGCCGCCGT	19-15	Silene_conica_mito_44	417	A>G	CTTGTCCCTTTTCTTACTCTGCTTTTCTCTTTATGGAATTCCAGTCAGCCCACCCAGCTTCTCCCTTTCAGTCTCTACTCTCTCTCCTCCCCGTATGAGAGGTTCAACCAACATATGACAAAGAAGCTCTCTTAACACATACGCCTCGCCCCATATAAAAGGGAGG
Silene conica	1	mt	CGTCCCCCGGCCCTAGAAAAAGTC	17-14	Silene_conica_mito_44	417	A>G	CTTTTCTCTTTATGGAATTCCAGTCAGCCCACCCAGCTTCTCCCTTTCAGTCTCTACTCTCTCTCCTCCCCGTATGAGAGGTTCAACCAACATATGACAAAGAAGCTCTCTTAACACATACGCCTCGCCCCATATAAAAGGGAGGGTCTAAGAGAGACTCCTCTTAGTCCTTAAGGAT
Silene conica	1	mt	AAAAATAAAAGATTCTCGCCTAGG[R2]	20-18	Silene_conica_mito_44	417	A>G	ACTCGTTACATTCTTACTTTACTTGTCCCTTTTCTTACTCTGCTTTTCTCTTTATGGAATTCCAGTCAGCCCACCCAGCTTCTCCCTTTCAGTCTCTACTCTCTCTCCTCCCCGTATGAGAGGTTCAACCAAC
Silene conica	1	mt	CCGGATAAGTTATAATCAACGATC	20-16	Silene_conica_mito_44	417	A>G	TCCCAAGCAGAAGAAGCAGCCGAGGCACTGAATGATTAACAAGAGGTGGTTTACCAAGTGATACGACTAAGAAGGGCCCAGCACTCGTTACATTCTTACTTTACTTGTCCCTTTTCTTACTCTGCTTTTCTCTTTATGGAATTCCAGTCAGCCCACCCAGCTTCTCCCTTTCAGTCTCTACTCTCTCTCCTCCCCGTATGAGAG
Silene conica	2	cp	GAATAACTTAAAGTAAGACCATGA[R1]	13-4	Silene_conica_mito_44	417	A>G	TTCCAGTCAGCCCACCCAGCTTCTCCCTTTCAGTCTCTACTCTCTCTCCTCCCCGTATGAGAGGTTCAACCAACATATGACAAAGAAGCTCTCTTAACACATACGCCTCGCCCCATATAAAAGGGAGGGTCTA
Silene conica	3	cp	AAGCTCCAAATGTGTTCACCGAGA	10-5	Silene_conica_mito_44	417	A>G	AGAAGCAGCCGAGGCACTGAATGATTAACAAGAGGTGGTTTACCAAGTGATACGACTAAGAAGGGCCCAGCACTCGTTACATTCTTACTTTACTTGTCCCTTTTCTTACTCTGCTTTTCTCTTTATGGAATTCCAGTCAGCCCACCCAGCTTCTCCCTTTCAGTCTCTACTCTCTCTCCTCCCCGTATGAGAGGTTC
Silene conica	3	cp	CGTACCAAACCCGAGATTCGAATC	19-12	Silene_conica_mito_44	417	A>G	CGACTAAGAAGGGCCCAGCACTCGTTACATTCTTACTTTACTTGTCCCTTTTCTTACTCTGCTTTTCTCTTTATGGAATTCCAGTCAGCCCACCCAGCTTCTCCCTTTCAGTCTCTACTCTCTCTCCTCCCCGTATGAGAGGTTCAACCAACATATGACAAAGAAGCTCTCTTAACACATACGCCTCGCCCCATATAAAAGGGAG
Silene conica	3	mt	ACAAAAGAAATAACTTAATATAGC	19-15	Silene_conica_mito_44	417	A>G	CACTGAATGATTAACAAGAGGTGGTTTACCAAGTGATACGACTAAGAAGGGCCCAGCACTCGTTACATTCTTACTTTACTTGTCCCTTTTCTTACTCTGCTTTTCTCTTTATGGAATTCCAGTCAGCCCACCCAGCTTCTCCCTTTCAGTCTCTACTCTCTCTCCTCCCCGTATGAGAGGT
Silene conica	3	mt	ACACTCAGGCAATGCCCGTAAAAA[R1]	12-9	Silene_conica_mito_44	417	A>G	AATTCCAGTCAGCCCACCCAGCTTCTCCCTTTCAGTCTCTACTCTCTCTCCTCCCCGTATGAGAGGTTCAACCAACATATGACAAAGAAGCTCTCTTAACACATACGCCTCGCCCCATATAAAAGGGAGGGTC
Silene conica	3	mt	CGGTAAAACTAACTACACGACGAA[R2]	28-24	Silene_conica_mito_44	417	A>G	TTACATTCTTACTTTACTTGTCCCTTTTCTTACTCTGCTTTTCTCTTTATGGAATTCCAGTCAGCCCACCCAGCTTCTCCCTTTCAGTCTCTACTCTCTCTCCTCCCCGTATGAGAGGTTCAACCAACATATG
Silene conica	3	mt	GCTTATCAAAAATCTATTAACGGG	35-30	Silene_conica_mito_44	417	A>G	AGGGAGCCTTCCCAAGCAGAAGAAGCAGCCGAGGCACTGAATGATTAACAAGAGGTGGTTTACCAAGTGATACGACTAAGAAGGGCCCAGCACTCGTTACATTCTTACTTTACTTGTCCCTTTTCTTACTCTGCTTTTCTCTTTATGGAATTCCAGTCAGCCCACCCAGCTTCTCCCTTTCAGTCTCTACTCTCTCTCCTCCCCGTATGAGA
Silene conica	3	mt	AGAGGGATGAGAATCTACATCCGG	25-13	Silene_conica_mito_44	417	A>G	CCTTTTCTTACTCTGCTTTTCTCTTTATGGAATTCCAGTCAGCCCACCCAGCTTCTCCCTTTCAGTCTCTACTCTCTCTCCTCCCCGTATGAGAGGTTCAACCAACATATGACAAAGAAGCTCTCTTAACACATACGCCTCGCCCCATATAAAAGGGAGGGTCTAAGAGAGACTCCTCTTA
Silene conica	1	mt	CAGGACCGCGACCGTCGACATAGC[R1]	20-18	Silene_conica_mito_44	16033	A>G	TAATACTCTAGTTTTTCTCTTTTTATGGGTCGACCTTTCTTAAAAAGAAATAATATAACAATTTGGCTATGCACCTATGCACTGTGACGAAATACTTCCGAGGAGGGGGGCTCGACCATAGGATAAGGAGGCT
Silene conica	1	mt	AGACTTTGAAACCCTCCCACCCGG[R2]	21-13	Silene_conica_mito_44	16033	A>G	GAAAGATAATACTCTAGTTTTTCTCTTTTTATGGGTCGACCTTTCTTAAAAAGAAATAATATAACAATTTGGCTATGCACCTATGCACTGTGACGAAATACTTCCGAGGAGGGGGGCTCGACCATAGGATAAG
Silene conica	1	mt	CCCGTGCCCGCATTATAGGGTAAA	12-10	Silene_conica_mito_44	16033	A>G	GGAAAGATAATACTCTAGTTTTTCTCTTTTTATGGGTCGACCTTTCTTAAAAAGAAATAATATAACAATTTGGCTATGCACCTATGCACTGTGACGAAATACTTCCGAGGAGGGGGGCTCGACCATAGGATAAGGAGGCTCCGCTT
Silene conica	2	cp	AGAATGAGTAAGTCGGATTTCCCG[R2]	13-11	Silene_conica_mito_44	16033	A>G	TTTGGCTATGCACCTATGCACTGTGACGAAATACTTCCGAGGAGGGGGGCTCGACCATAGGATAAGGAGGCTCCGCTTTAATTTAAAGTGGAGGTTTAGAATGCTCGAACGTTAGTGAGAGGAGAAGGATCGA
Silene conica	3	mt	ACAGGACAGCCGAGAAACGATGAT[R2]	22-20	Silene_conica_mito_44	16033	A>G	TAAAAAGAAATAATATAACAATTTGGCTATGCACCTATGCACTGTGACGAAATACTTCCGAGGAGGGGGGCTCGACCATAGGATAAGGAGGCTCCGCTTTAATTTAAAGTGGAGGTTTAGAATGCTCGAACGT
Silene conica	3	mt	CATTGCGGAAAGGGAGACCGGTCA[R2]	21-10	Silene_conica_mito_44	16033	A>G	CTCTTTTTATGGGTCGACCTTTCTTAAAAAGAAATAATATAACAATTTGGCTATGCACCTATGCACTGTGACGAAATACTTCCGAGGAGGGGGGCTCGACCATAGGATAAGGAGGCTCCGCTTTAATTTAAAG
Silene conica	3	mt	GACAGCACTGCCGTAATACTTAGA	24-24	Silene_conica_mito_44	16033	A>G	AAGGACACGGAGTGGGATCTACTGAAAAGGAAAGATAATACTCTAGTTTTTCTCTTTTTATGGGTCGACCTTTCTTAAAAAGAAATAATATAACAATTTGGCTATGCACCTATGCACTGTGACGAAATACTTCCGAGGAGGGGGGCTCGACCATAGGATAAGGAGGCTCCGCTTTAATTTAAAGTGGAG
Silene conica	3	mt	ATAATAGAATGGTCCTACTCATTT	29-11	Silene_conica_mito_44	16033	A>G	TAAAAAGAAATAATATAACAATTTGGCTATGCACCTATGCACTGTGACGAAATACTTCCGAGGAGGGGGGCTCGACCATAGGATAAGGAGGCTCCGCTTTAATTTAAAGTGGAGGTTTAGAATGCTCGAACGTTAGTGAGAGGAGAAGG
Silene conica	1	cp	TAGAATATCAAATGGCGGCAAGAT[R1]	26-24	Silene_conica_mito_44	16606	A>G	ATTCATCCAAGGTTCAATTCATCCAATGAGGTTGGGTTTGATGCAGCATCGTCTTCGTCTCTTGATCCTATTGAAGCATCCTCTGCTTACCCAGGGAGCCTAGTAATATTGAAGTTCAGAAGCTGCAGCTTCT
Silene conica	1	mt	CACAGAATCCACGTATAGGAATCC	17-12	Silene_conica_mito_44	82786	C>T	TTTAAGGCCGAGCAGAAGACTCTCTCGAGGTACGAGGGGCGGGATGAGACCAGAGGATATGATACTGAAAAGTAGAGAGGGCTCGAACGGATGTGATCGGGTGCGAAGTGGGATCGAGTGAGTGTTACAGAAATGGTGATGAAAGAGCTCGAACGGGAGTGAGAAGAGAAAGAAATAGACAAACAAGCTTAGTAACTAGATCCTTTGGCTGAGTAGAATGCCAGAAAGAG
Silene conica	1	cp	GCCGACATGTGTGTAAACATGTCA	21-15	Silene_conica_mito_44	95371	A>G	TGTTATGCCCCGTCTTACTTACTAATGAAAGTTGCGGTTAAGCCTTTTTTCTCATAGGTCAAAGCAAGCTCTCTACTATATTAGGGGAGAACTTGCTTTTTGTGGCTTATCTTTCCAAAGTGGAAAGTGAACTTCGTGGTGTATAAAGAGTTCGTAATCTTTGTTTCTAGGTAAGATTCCGAAGGCTA
Silene conica	1	mt	AAAGATAATACAACAATTTGACAC[R1]	11-8	Silene_conica_mito_45	2068	C>T	TATCATAGAAGAGGCCATCTATAGTCTTCAATCAAGAGAACTTCCTACTTCTCCTTTTTCCTCTCGAAGAGTGCGTTCAGAGGAGACTTCTTTCTAGTCTTTGAAGCTGCTAGAGAATTCCCATTAATTTATG
Silene conica	1	mt	AAGTCTACACGTGATAAAAAAAAG[R2]	22-18	Silene_conica_mito_45	2068	C>T	TAGAAGAGGCCATCTATAGTCTTCAATCAAGAGAACTTCCTACTTCTCCTTTTTCCTCTCGAAGAGTGCGTTCAGAGGAGACTTCTTTCTAGTCTTTGAAGCTGCTAGAGAATTCCCATTAATTTATGATCTT
Silene conica	3	mt	GCCGATCTCCCCTTAAAGAGGTTA[R2]	23-6	Silene_conica_mito_45	2068	C>T	ATAGAAGAGGCCATCTATAGTCTTCAATCAAGAGAACTTCCTACTTCTCCTTTTTCCTCTCGAAGAGTGCGTTCAGAGGAGACTTCTTTCTAGTCTTTGAAGCTGCTAGAGAATTCCCATTAATTTATGATCT
Silene conica	3	mt	CTCGCCGCGCAGGGCCAGGATCCG[R2]	20-9	Silene_conica_mito_45	2068	C>T	TTCATCAGGAAGTTCTTCAACTACATATACTAGTGTTATCATAGAAGAGGCCATCTATAGTCTTCAATCAAGAGAACTTCCTACTTCTCCTTTTTCCTCTCGAAGAGTGCGTTCAGAGGAGACTTCTTTCTAG
Silene conica	2	cp	GCAGAACCGGCATATAACATAGGC[R2]	13-10	Silene_conica_mito_45	56205	A>G	GCTACCTTTTCTGCCAATCGCCTGTATATATATACAGAAGTTTAGTCCATTTTAATGTGCTCTTGATGAGTTGATGATCTTTCTTTTCGAAAACACTTTTTCTAAAGAGTCTAATAAGTCAGAGCCCACTGGA
Silene conica	2	cp	AAGAAGAAATCCCCGCCGATGGAT	11-3	Silene_conica_mito_46	63080	A>G	AACTCCAAAGTCTGATGGTCGGCAGGCGCGACTCATAGTTGACTGAAAGTCAAAGGTCCTCCCCCCTCCACCTCGTACCTCGGCGGAGCCCCCTTATTTCCTCCACTTCATGCTTCAGCGGAGCCTCCTAATTTCCTCCACCTCGTACCTCGGCAGAGCCTCCTTATCTCCTTTAAAGGTACGTGCTGAGCCGAGTGCTTCTAGAATAAAGAACGTTGAAAGGCCTAATA
Silene conica	1	cp	GTCCAATAGAATTAGCAAGAATAC[R2]	25-14	Silene_conica_mito_46	76125	A>G	AATTCTTCTTCATTCTTATATACGTATATGGTAATAGACATTTCGACTTGCTTTTTTTCGAACTTCTTTTTCCTGTTCATCTGTACGAGCAAAGCGCTTGACCTCTGGCTGAGGAAGGACCCATCTCACCCTT
Silene conica	1	cp	ACGCAGTCCCTACAATTTAAAGCG	20-18	Silene_conica_mito_46	76125	A>G	CGAACTTCTTTTTCCTGTTCATCTGTACGAGCAAAGCGCTTGACCTCTGGCTGAGGAAGGACCCATCTCACCCTTTACCATATAAGTATATAATCATATTGATCTTTTCACGCAAGTTGGTTGAACTTCTCCTTGTCAAATTGATGTGTCCCAGAGAGAGAATGAGAGGGAAGAGTTTAGCATAGAAGAGCTTCCTTTCTT
Silene conica	1	cp	ATCCAGTCGACTCCGCATAATTTA[R1]	18-14	Silene_conica_mito_46	76125	A>G	GAACTTCTTTTTCCTGTTCATCTGTACGAGCAAAGCGCTTGACCTCTGGCTGAGGAAGGACCCATCTCACCCTTTACCATATAAGTATATAATCATATTGATCTTTTCACGCAAGTTGGTTGAACTTCTCCTT
Silene conica	1	cp	CCGTCTTATGGATTAGCAATTTGC	15-15	Silene_conica_mito_46	76125	A>G	AAAAAGCAAGCTCTGATCAAGCACTCTTGTTTCGAAAAGACTCAATTTCATAAATTCTTCTTCATTCTTATATACGTATATGGTAATAGACATTTCGACTTGCTTTTTTTCGAACTTCTTTTTCCTGTTCATCTGTACGAGCAAAGCGCTTGACCTCTGGCTGAGGAAGGACCCATCTCACCCTTTACCATATAAGTATATAATCATATT
Silene conica	1	cp	CGGTGACTTAAAGAGGGATACATC[R2]	10-8	Silene_conica_mito_46	76125	A>G	GTACGAGCAAAGCGCTTGACCTCTGGCTGAGGAAGGACCCATCTCACCCTTTACCATATAAGTATATAATCATATTGATCTTTTCACGCAAGTTGGTTGAACTTCTCCTTGTCAAATTGATGTGTCCCA
Silene conica	1	mt	TCAACCGGCAAGTTTATGTAACCA[R2]	16-5	Silene_conica_mito_46	76125	A>G	ATTCTTCTTCATTCTTATATACGTATATGGTAATAGACATTTCGACTTGCTTTTTTTCGAACTTCTTTTTCCTGTTCATCTGTACGAGCAAAGCGCTTGACCTCTGGCTGAGGAAGGACCCATCTCACCCTTT
Silene conica	1	mt	AGCTCATCACGTCTCAAAAATATA	17-15	Silene_conica_mito_46	76125	A>G	AAGCTCTGATCAAGCACTCTTGTTTCGAAAAGACTCAATTTCATAAATTCTTCTTCATTCTTATATACGTATATGGTAATAGACATTTCGACTTGCTTTTTTTCGAACTTCTTTTTCCTGTTCATCTGTACGAGCAAAGCGCTTGACCTCTGGCTGAGGAAGGACCCATCTCACCCTTTA
Silene conica	1	mt	ATAACTTATCTCGACGACAAAATA[R2]	23-18	Silene_conica_mito_46	76125	A>G	TTTTTCCTGTTCATCTGTACGAGCAAAGCGCTTGACCTCTGGCTGAGGAAGGACCCATCTCACCCTTTACCATATAAGTATATAATCATATTGATCTTTTCACGCAAGTTGGTTGAACTTCTCCTTGTCAAAT
Silene conica	1	mt	ATGCGTTGGATGGCCCCAATAGCA	13-8	Silene_conica_mito_46	76125	A>G	CTTCTTTTTCCTGTTCATCTGTACGAGCAAAGCGCTTGACCTCTGGCTGAGGAAGGACCCATCTCACCCTTTACCATATAAGTATATAATCATATTGATCTTTTCACGCAAGTTGGTTGAACTTCTCCTTGTCAAATTGATGTGTCCCAGAGAGAGAATGAGAGGGAAGAGTTTAGCATAGAAGAGCTTCCTTT
Silene conica	1	mt	CAAAGGTGCCAGTCGGTTAACAAT[R2]	19-18	Silene_conica_mito_46	76125	A>G	TTTTCCTGTTCATCTGTACGAGCAAAGCGCTTGACCTCTGGCTGAGGAAGGACCCATCTCACCCTTTACCATATAAGTATATAATCATATTGATCTTTTCACGCAAGTTGGTTGAACTTCTCCTTGTCAAATT
Silene conica	1	mt	CATGATTGGATGTATACACAAAAA	17-14	Silene_conica_mito_46	76125	A>G	TCATCTGTACGAGCAAAGCGCTTGACCTCTGGCTGAGGAAGGACCCATCTCACCCTTTACCATATAAGTATATAATCATATTGATCTTTTCACGCAAGTTGGTTGAACTTCTCCTTGTCAAATTGATGTGTCCCAGAGAGAGAATGAGAGGGAAGAGTTTAGCATAGAAGAGCTTCCTTTCTTTAAAAT
Silene conica	1	mt	GACCTGTCCAGTGCTTAGTACTCA	17-11	Silene_conica_mito_46	76125	A>G	AAGCACTCTTGTTTCGAAAAGACTCAATTTCATAAATTCTTCTTCATTCTTATATACGTATATGGTAATAGACATTTCGACTTGCTTTTTTTCGAACTTCTTTTTCCTGTTCATCTGTACGAGCAAAGCGCTTGACCTCTGGCTGAGGAAGGACCCATCTCACCCTTTACCATATAAGTATATAATCATATTGATCTT
Silene conica	1	mt	ACACAAGTTAAACCGCTCCAGACC	14-13	Silene_conica_mito_46	76125	A>G	CTCTGATCAAGCACTCTTGTTTCGAAAAGACTCAATTTCATAAATTCTTCTTCATTCTTATATACGTATATGGTAATAGACATTTCGACTTGCTTTTTTTCGAACTTCTTTTTCCTGTTCATCTGTACGAGCAAAGCGCTTGACCTCTGGCTGAGGAAGGACCCATCTCACCCTTTACCATATAAGTATATAATCATAT
Silene conica	1	mt	AACCATTTTAAAGCTTCGTATGAG[R1]	10-10	Silene_conica_mito_46	76125	A>G	CCTCTGGCTGAGGAAGGACCCATCTCACCCTTTACCATATAAGTATATAATCATATTGATCTTTTCACGCAAGTTGGTTGAACTTCTCCTTGTCAAATTGATGTGTCCCAGAGAGAGAATGAGAGGGAAGAGT
Silene conica	2	cp	AAAGAGCTTTAAATATAAGGGAAA	9-9	Silene_conica_mito_46	76125	A>G	TGGTAATAGACATTTCGACTTGCTTTTTTTCGAACTTCTTTTTCCTGTTCATCTGTACGAGCAAAGCGCTTGACCTCTGGCTGAGGAAGGACCCATCTCACCCTTTACCATATAAGTATATAATCATATTGATCTTTTCACGCAAGTTGGTTGAA
Silene conica	2	cp	AGTTGGTACCTAGGCAACTTATCT	13-11	Silene_conica_mito_46	76125	A>G	AAATTCTTCTTCATTCTTATATACGTATATGGTAATAGACATTTCGACTTGCTTTTTTTCGAACTTCTTTTTCCTGTTCATCTGTACGAGCAAAGCGCTTGACCTCTGGCTGAGGAAGGACCCATCTCACCCTTTACCATATAAGTATATAATCATATTGATCTTTTCACGCAAGTTG
Silene conica	2	cp	CACCATCGGCAACCTTATTAAAAT[R2]	8-7	Silene_conica_mito_46	76125	A>G	TCATCTGTACGAGCAAAGCGCTTGACCTCTGGCTGAGGAAGGACCCATCTCACCCTTTACCATATAAGTATATAATCATATTGATCTTTTCACGCAAGTTGGTTGAACTTCTCCTTGTCAAATTGATGTGTCC
Silene conica	2	cp	CACCCAGGACCTGAGACCAGCGAC[R2]	9-3	Silene_conica_mito_46	76125	A>G	TACGAGCAAAGCGCTTGACCTCTGGCTGAGGAAGGACCCATCTCACCCTTTACCATATAAGTATATAATCATATTGATCTTTTCACGCAAGTTGGTTGAACTTCTCCTTGTCAAATTGATGTGTCCCAGAGAG
Silene conica	2	cp	CCAAACTATGGTGACACTTCTACG[R2]	16-9	Silene_conica_mito_46	76125	A>G	GAACTTCTTTTTCCTGTTCATCTGTACGAGCAAAGCGCTTGACCTCTGGCTGAGGAAGGACCCATCTCACCCTTTACCATATAAGTATATAATCATATTGATCTTTTCACGCAAGTTGGTTGAACTTCTCCTT
Silene conica	2	cp	CGCAGCAGAACACTACCCAAAGCT[R1]	20-6	Silene_conica_mito_46	76125	A>G	CGAACTTCTTTTTCCTGTTCATCTGTACGAGCAAAGCGCTTGACCTCTGGCTGAGGAAGGACCCATCTCACCCTTTACCATATAAGTATATAATCATATTGATCTTTTCACGCAAGTTGGTTGAACTTCTCCT
Silene conica	2	cp	CTACGATCTAACGGAAATCTTGAC	6-3	Silene_conica_mito_46	76125	A>G	CTGTACGAGCAAAGCGCTTGACCTCTGGCTGAGGAAGGACCCATCTCACCCTTTACCATATAAGTATATAATCATATTGATCTTTTCACGCAAGTTGGTTGAACTTCTCCTTGTCAAATTGATGTGTCCCAGAGAGAGAATGAGAGGGAAGAGTTTAGCATAGAAGAGCTTCCT
Silene conica	2	cp	TCGAGCGGGCCATCGGTTGAGCTA[R2]	11-10	Silene_conica_mito_46	76125	A>G	TTTTCGAACTTCTTTTTCCTGTTCATCTGTACGAGCAAAGCGCTTGACCTCTGGCTGAGGAAGGACCCATCTCACCCTTTACCATATAAGTATATAATCATATTGATCTTTTCACGCAAGTTGGTTGAACTTC
Silene conica	2	cp	ATAAACTCGACAGTAACACGCGAA	10-6	Silene_conica_mito_46	76125	A>G	CTTCATTCTTATATACGTATATGGTAATAGACATTTCGACTTGCTTTTTTTCGAACTTCTTTTTCCTGTTCATCTGTACGAGCAAAGCGCTTGACCTCTGGCTGAGGAAGGACCCATCTCACCCTTTACCATATAAGTATATAATCATATTGATCTTTTCACGCAAGTTGGTTGAACTTCTCCTTGTCAAATTGATGTGTCC
Silene conica	2	cp	CACCCGCACCTCCCTATTCAAAGA[R1]	10-6	Silene_conica_mito_46	76125	A>G	TTGACCTCTGGCTGAGGAAGGACCCATCTCACCCTTTACCATATAAGTATATAATCATATTGATCTTTTCACGCAAGTTGGTTGAACTTCTCCTTGTCAAATTGATGTGTCCCAGAGAGAGAATGAGAGGGAA
Silene conica	3	cp	AAAAGCGGCTGATGCTAGAATCAA	11-9	Silene_conica_mito_46	76125	A>G	TTCTTCTTCATTCTTATATACGTATATGGTAATAGACATTTCGACTTGCTTTTTTTCGAACTTCTTTTTCCTGTTCATCTGTACGAGCAAAGCGCTTGACCTCTGGCTGAGGAAGGACCCATCTCACCCTTTACCATATAAGTATATAATCATATTGATCTTTTCACGCAAGTTGGTTGAACTTCTCCTTGTCAAATTGATGTGTCCCAGAGAGAG
Silene conica	3	cp	CAGACTTGCAATTGTATACATACT[R2]	12-5	Silene_conica_mito_46	76125	A>G	ATATGGTAATAGACATTTCGACTTGCTTTTTTTCGAACTTCTTTTTCCTGTTCATCTGTACGAGCAAAGCGCTTGACCTCTGGCTGAGGAAGGACCCATCTCACCCTTTACCATATAAGTATATAATCATATT
Silene conica	3	cp	CACGTTCGCCGGGAGAGGGCTCTG	8-7	Silene_conica_mito_46	76125	A>G	TTCTTCATTCTTATATACGTATATGGTAATAGACATTTCGACTTGCTTTTTTTCGAACTTCTTTTTCCTGTTCATCTGTACGAGCAAAGCGCTTGACCTCTGGCTGAGGAAGGACCCATCTCACCCTTTACCATATAAGTATATAATCATATTGATCTTTTCACGCAAGTTGG
Silene conica	3	mt	AACGAACGTCAAAGTCCAATTGTC	26-14	Silene_conica_mito_46	76125	A>G	GGTTAGGAGGATAAGGAAAAAGCAAGCTCTGATCAAGCACTCTTGTTTCGAAAAGACTCAATTTCATAAATTCTTCTTCATTCTTATATACGTATATGGTAATAGACATTTCGACTTGCTTTTTTTCGAACTTCTTTTTCCTGTTCATCTGTACGAGCAAAGCGCTTGACCTCTGGCTGAGGAAGGACCCATCTCACCCTT
Silene conica	3	mt	CCCGACCGCCTGCGAGGAGCGATC	22-17	Silene_conica_mito_46	76125	A>G	CATTCTTATATACGTATATGGTAATAGACATTTCGACTTGCTTTTTTTCGAACTTCTTTTTCCTGTTCATCTGTACGAGCAAAGCGCTTGACCTCTGGCTGAGGAAGGACCCATCTCACCCTTTACCATATAAGT
Silene conica	3	mt	GGTTCGGCATAGTGCATACAGGGA[R2]	17-16	Silene_conica_mito_46	76125	A>G	TTTTTTCGAACTTCTTTTTCCTGTTCATCTGTACGAGCAAAGCGCTTGACCTCTGGCTGAGGAAGGACCCATCTCACCCTTTACCATATAAGTATATAATCATATTGATCTTTTCACGCAAGTTGGTTGAACT
Silene conica	3	mt	TATGTATAAATATGACGGATATGA	23-19	Silene_conica_mito_46	76125	A>G	CTTCTTTTTCCTGTTCATCTGTACGAGCAAAGCGCTTGACCTCTGGCTGAGGAAGGACCCATCTCACCCTTTACCATATAAGTATATAATCATATTGATCTTTTCACGCAAGTTGGTTGAACTTCTCCTTGTCAAATTGATGTGTCCCAGAGAGAGAATGAGAGGGAAGAGTTTAGCATAGAAGAGCTTCCTTTCTTTA
Silene conica	3	mt	AACGGATCAGGCATATCAACACGT	25-19	Silene_conica_mito_46	76125	A>G	ATTCTTCTTCATTCTTATATACGTATATGGTAATAGACATTTCGACTTGCTTTTTTTCGAACTTCTTTTTCCTGTTCATCTGTACGAGCAAAGCGCTTGACCTCTGGCTGAGGAAGGACCCATCTCACCCTTTACCATATAAGTATATAATCATATTGATCTTTTCACGCAAGTTGGTTGAACTTCTCCTTGTCAAATTGAT
Silene conica	3	mt	CCCGCTTAAACGGTGAAACCAGTG	26-18	Silene_conica_mito_46	76125	A>G	CTGGCTGAGGAAGGACCCATCTCACCCTTTACCATATAAGTATATAATCATATTGATCTTTTCACGCAAGTTGGTTGAACTTCTCCTTGTCAAATTGATGTGTCCCAGAGAGAGAATGAGAGGGAAGAGTTTAGCATAGAAGAGCTTCCTTTCTTTAAAATCTTGTTCAATTTAATTCTTCCTT
Silene conica	1	cp	GGCAACAATGCATTCAAGCCCTGT	18-16	Silene_conica_mito_46	77033	A>G	AAGAATCTCCCAGCCCGGTAAAAGAAGACTTTACAAAGTACCTTTGTTTGGAAATTAAATTGGTTTGACTAGAAGGAAAAAGGCTCGTCTTCAGTATGATGGCGAGGAAAAAGGCTCGACCATGAGGGAGAGGAGGTAGCTTAATAAGTGCTCGACCAACGGGAGAGGGGGGACAAATGAGACTCGACTGACAAGGAGAGGACCCG
Silene conica	2	cp	AAAGAAAAACAATCCGCTCCACCT[R2]	13-6	Silene_conica_mito_46	77033	A>G	AAAGGCTCGACCATGAGGGAGAGGAGGTAGCTTAATAAGTGCTCGACCAACGGGAGAGGGGGGACAAATGAGACTCGACTGACAAGGAGAGGACCCGAAAGGGGACGAGACTGACAAGGATCGGGGGTTTATC
Silene conica	2	cp	TGCTCCTCGACGTGGCCAGCACCC[R1]	13-5	Silene_conica_mito_46	77033	A>G	GCTCGTCTTCAGTATGATGGCGAGGAAAAAGGCTCGACCATGAGGGAGAGGAGGTAGCTTAATAAGTGCTCGACCAACGGGAGAGGGGGGACAAATGAGACTCGACTGACAAGGAGAGGACCCGAAAGGGGAC
Silene conica	3	cp	AATATATTAACGGACTGCCCCTCG	12-11	Silene_conica_mito_46	77033	A>G	TGAGGGAGAGGAGGTAGCTTAATAAGTGCTCGACCAACGGGAGAGGGGGGACAAATGAGACTCGACTGACAAGGAGAGGACCCGAAAGGGGACGAGACTGACAAGGATCGGGGGTTTATCCTGTCGACCGTGAGGAGATAGACTCGACTAGAAGGAGAGGACCTAAGGGGACTCGAGTTCATACGAGAGGGAGATAAGCCCAAGAAGGGAGAGAGACT
Silene conica	3	cp	CGAACCGAAATACGCATATAGACT	15-8	Silene_conica_mito_46	77033	A>G	AGGCTCGTCTTCAGTATGATGGCGAGGAAAAAGGCTCGACCATGAGGGAGAGGAGGTAGCTTAATAAGTGCTCGACCAACGGGAGAGGGGGGACAAATGAGACTCGACTGACAAGGAGAGGACCCGAAAGGGGACGAGACTGA
Silene conica	3	mt	CTGAGTCAAATAGACATAACTATG	22-15	Silene_conica_mito_46	77033	A>G	CTCGACCATGAGGGAGAGGAGGTAGCTTAATAAGTGCTCGACCAACGGGAGAGGGGGGACAAATGAGACTCGACTGACAAGGAGAGGACCCGAAAGGGGACGAGACTGACAAGGATCGGGGGTTTATCCTGTCGACCGTGAGGAGATAGACTCGACTAGAAGGAGAGGACCTAAGGGGACTCGAGTTCATACGAGAGGGAGATAAGCCCA
Silene conica	3	mt	AACTGATCTGTATCCACCCCTGAC[R1]	25-13	Silene_conica_mito_46	77033	A>G	GAAGGAAAAAGGCTCGTCTTCAGTATGATGGCGAGGAAAAAGGCTCGACCATGAGGGAGAGGAGGTAGCTTAATAAGTGCTCGACCAACGGGAGAGGGGGGACAAATGAGACTCGACTGACAAGGAGAGGACC
Silene conica	3	mt	CACGAGTCCGGGGAGCATAAGAGC	20-17	Silene_conica_mito_46	77033	A>G	TTCAGTATGATGGCGAGGAAAAAGGCTCGACCATGAGGGAGAGGAGGTAGCTTAATAAGTGCTCGACCAACGGGAGAGGGGGGACAAATGAGACTCGACTGACAAGGAGAGGACCCGAAAGGGGACGAGACTGACAAGGATCGGGGGTTTATCCTGTCGACCGTGAGGAG
Silene conica	2	cp	GAAAAGACGCCTGCTTGTGCATCG	15-4	Silene_conica_mito_46	77931	A>C	CATGTGTCCGAAAAATAAAGAGAGGAAGATAAAGCTAAAGTTCGAGAACGAGAAAAAGGAGGATTTAGCCTCGGCTGCTAAGTAGAGGAGAAGGAGATAAAGGCTCAAGTGCATACGAGAGGGGGTGAATACTGAAGTATGAAGGAGAGGGTTTTATTTAG
Silene conica	3	mt	CAGAACCTTCCACCTCTCACCGAG	21-12	Silene_conica_mito_46	78687	C>A	ATTTGCATATAAAGAAGAAAGACAAGAAGAGCATATCGACGAGGGGCTAGAATTAGAGGGACTCTGCCAAAGGAGAGGGGTGAGGTTGTAAGGCCTAGGAGATTGGCTCGAGTGCATACGACCACTTGTGGACTCTTCCGTCAGGGAGAGGGGGT
Silene conica	2	cp	CCCCAGCGACCATAGATACGCCGT	11-7	Silene_conica_mito_46	96120	A>G	GTCAAAAAGAGCTTCAATCCAAAGCAAGACAGAGGCAAGTTTTCAACAAGAATTGATGAATTTGCTCTATTACCATATACGTATATAAGAATGAAGAAGTTAGATACTAATTTAAGACCTAAAGAAGAGAGGGGGGATGGTGCGAAAAGAGCCGAAAGAGTCTCTTTTGATTCGCTTTAATTTTACCATTTTTTCAAAGTTGAAGCAAGAGAGGCTT
Silene conica	1	mt	CAGATACAGCAAGAATTTAAAAAC	19-17	Silene_conica_mito_47	27228	A>G	AGACCACTAGATCGAAGACCGGTCATTTCCCAGCTAGTCAAAATCTTGGCTAATTGATCGAAATGCGTAGCTCCAGTAGAACCATAGATCAAAGAACAAAGAGGGTGGATACATAAAAGAACTATAGACGAGAATCCCCCCCCACACCGTACGTGCGACTCTCACCGCATACGGCTCGCACAAAGACTCTAAAATGAAGAAAAGCCTT
Silene conica	1	mt	ACCATGAGCTAAACTTGGCCACCA	12-11	Silene_conica_mito_47	32859	C>A	CTTTTAAAACATTAAATTGAGACAAGAAAAACTGGATAAACTGGAGCGTAAACTCGGGCCAAATAGACTTCAAGAGAGCACAAACTAGGCAAAAAGAGAGTCAAGTGAAATGAAGAAGAATTGACGAAAAAGACCTATTACCATATACGTATATAAGAATGAAG
Silene conica	3	cp	CACGCTGTCACCCCAGGAACTCGA	16-8	Silene_conica_mito_47	37434	A>G	TGCCTTTCTTTCTCAAAGCTCTCATTCTTTCGCCTCTTCTTAGCAGTCTTCACCAACCCCCTCTCGTATGCACTCGAGCCTCTTTCCTCCCCCGTTGGTCGACCTCGATTCTCTTTCCTCTCCTTTTAGTCGAGTACCACGATGAAATGACCAAAAAGACTTCTTTTTTTCACTTTCCTAT
Silene conica	1	mt	GTGTACATAGTGTACAAGGTTTCT	21-13	Silene_conica_mito_47	47839	A>T	CGAGCTATTTTAACCTCGATTCTCTCCTTAAGCAGTTGATCCGCGGGTCCACAAAAGAAGTTGCAGCTGAAGAAGACGACGGACTCTCCACGAAGGGAAAGAGTAGGCAAGACAAGAGTACGAAGCTTCAGAAGGCGAAGCAGAAGATTGTGGGCTCTCTTCGGAAGAAGCATAAGATAGGGACCGACCCCTCCCAAGCAGAAGAAGCAGCAGCTTCAGAACTGAAAGATTA
Silene conica	2	cp	GTATCTCGCACCGTTTTATAACAC	8-5	Silene_conica_mito_47	68941	A>G	CTCTCTAAACTCTCGGCTCGTTACATAAATTTCACCCGCCCCCTATCTTAGAATACCCTATGAACACGCTTGTCAACATGCTCTACTCCTGTATGGCTCTTTTCTCTGCCCAACCTACGTCTACAAGAATACCGGTATCTCGGAACCCTTCTTCCTCTACAAGGCACTATCAAAAGAGCTGGGCTTTCCAACATATGGACTAGCAGCAAATGTATTTAGTTGCTTGCGCTGAGG
Silene conica	3	cp	AACCTTCCTCAAAGTTACTGGAGT	8-7	Silene_conica_mito_48	4531	A>G	CTCATTGTCAGTCTTCTCTCCTTCTCTATCCGCTTTGCAGTCGACCTCGTCTCTCCTTCCTCATCGTATTCACTCTCGTCTTATACCTACCCGCTCGTATGCCGGCACATACATATCATACATACACAGTACGCGCGTGTGAGGGCGAAGATATCTTTGGCTGAGGGCGCATTGGACGCCGGCCGTATCA
Silene conica	3	cp	AGTCAGCGGAATCTGGCTATGCAT	10-7	Silene_conica_mito_48	4531	A>G	CCCTTTCCATCTAGTCAAGTCTTTCCTTCTTTCTTCTACCCTATAACCTCTCCTTCACAGTCCCTCCCACTGGGCTTATCCCCTCGGAAGAAAGTCAAAGGTCAGCACCCTATCTCATTGTCAGTCTTCTCTCCTTCTCTATCCGCTTTGCAGTCGACCTCGTCTCTC
Silene conica	3	cp	AATCGATACAAAACTTACAAACAA	9-9	Silene_conica_mito_48	8327	A>G	TGACGTCTCTGTCAGCTACTGATCCAGATAGAGGAAATCCTTATGATTCTGCTGTTAGTCTTAGTGAAAGAGGTTTCTCTTTATAAGTAGGAGGCTCCTTCTTTATATAATATAAGCACAAGCAATGGAGGAGGAAAGGTCTGAAATGACTAGAGCAAGAATAGCGATGTCTATATTAGTTGTAAGAGCATTCTAGGCTTAGTAGAAAAGACTGA
Silene conica	2	cp	TCCAGACTTTTCTGGTTCCCTCTT[R2]	16-14	Silene_conica_mito_48	27048	C>G	ATGGTAGTTGAAAGTGGTCAATTGTTTGCTTATCTTTCTTCACATTCTAGCCCTATAATTCTAACTAGAATTTAATGGAACAAAAAAGCGCGACAGTACGATTTAAAACGAGGGCGGACTCGTGCCCTCATTC
Silene conica	1	cp	AGCTCATTCAGACATTCATACCCA	21-8	Silene_conica_mito_48	92230	A>G	TTCCTCTGAGTAAGTAAGTTAGTGAATGAAGGCAAGCAGGTTGGGAGGTAGGCTTGGTAACTTCTCCCTTCCATCTTTCGTTCGAGTTCTTCCCTTTAAATTAAAGAAGGA
Silene conica	1	mt	ACAAAAGAGGTACACGTGATCCCT[R2]	18-10	Silene_conica_mito_48	92230	A>G	GAATGAAGGCAAGCAGGTTGGGAGGTAGGCTTGGTAACTTCTCCCTTCCATCTTTCGTTCGAGTTCTTCCCTTTAAATTAAAGAAGGAGAGCGCTTCAATTAAGTTGTTAAGCACGCTTACTGGCTGATGCTT
Silene conica	1	mt	GAACATTAAAGTTCCATCCATCAC[R2]	22-10	Silene_conica_mito_48	92230	A>G	AGGCTTGGTAACTTCTCCCTTCCATCTTTCGTTCGAGTTCTTCCCTTTAAATTAAAGAAGGAGAGCGCTTCAATTAAGTTGTTAAGCACGCTTACTGGCTGATGCTTCCTAAAGGAAAAGACTGCTCCTGAAG
Silene conica	1	mt	GTATGCACGACGTCCTGACCGGAG	21-19	Silene_conica_mito_48	92230	A>G	GGAAGCGCTTAAAATAGAAATACGGATGAAGTTTGTTCTGTTCCTCTGAGTAAGTAAGTTAGTGAATGAAGGCAAGCAGGTTGGGAGGTAGGCTTGGTAACTTCTCCCTTCCATCTTTCGTTCGAGTTCTTCCCTTTAAATTAAAGAAGGAGAGCGCTTCAATTAAGTTGTTAAGCACGCTTACTGGCTG
Silene conica	3	cp	GTCCGCACCATAGTGAGCAGTGTA[R1]	17-5	Silene_conica_mito_48	92230	A>G	CTGTTCCTCTGAGTAAGTAAGTTAGTGAATGAAGGCAAGCAGGTTGGGAGGTAGGCTTGGTAACTTCTCCCTTCCATCTTTCGTTCGAGTTCTTCCCTTTAAATTAAAGAAGGAGAGCGCTTCAATTAAGTTG
Silene conica	3	cp	GAAGTGACCCTATGGACTTATTCT	11-8	Silene_conica_mito_49	58066	C>G	AAGAAGTCCTTTGTTGTTATACGTTTTTCTGAAAACATCCCAATTCTTATATACGTATATGGTAATGATGATGAATCTGCTGAGTGTGACCCTGGCTGAGCTCTTTCTCTGTCTTGGGCTACTTTCTCTTATTCTCTTCTATCTTTCTTTTTAGGGCACATGAATTTGGCAAAGACAAGTTCAAGCAACTAGAAAAAGAGGA
Silene conica	2	cp	CCCCAAGGTAATCGCTTTGGCACG	13-8	Silene_conica_mito_49	73372	A>G	TATGAAAGAGCTCTAATAAAAGGAGAGGATGAAGGCTCCGCTGAGGTACACGAGGTGGGGGACACGAAGTGGGAGGAGACTGACAACGAGATAGCCCTAAGAGTGGGAGGAGACTGGAAGGGTCGGGGATTTTTCCTTTACTGCAAAGGAAGTAGCCCGAAGCCCTTTAGGGGAGTAGACTGAAGTACGAGGGTGAAATAAGGAGGTAG
Silene conica	3	cp	ACCAAGTGGAGCAGCTCCATGCCG	10-8	Silene_conica_mito_49	85984	A>G	TTTCCTGAAGAAGAAGACTACGAATTCTCTCTCTTTAATGCCTTTGAGTTTGCTTCCTTTTTTCATGGGGTGAAGAGGGCTATTGAGTAAGTCAGGGAAGATTGTAGATAGCAGTGTAATCGGATGGAAAAGAGTAATCCCCAGGGAAGTCCAATCTGTATCCAAAGATC
Silene conica	1	mt	ACCCGCCCGCCTCTAGCCAGCTGA	15-15	Silene_conica_mito_5	115814	C>A	GTCGAATAGATGCTTCACTCTTTCTTTGACGGGCTGTTGACCCGCCTTTATATCCACCCATTCGGCCAAATGCTTCCGAACGTCGCTTTAGACTAAAACTCAAGAACCCGCGTCCAGAAGATACGATTCTTACATCCCTTGACTAGGAGGCGGCAGTCTTGGACCGTTC
Silene conica	3	cp	AAACCTCGGATCAGGTCCAGAAGC	6-6	Silene_conica_mito_5	126448	A>C	AAGCGAGAACTTTTTTCGTATTTGGCCAACTAGCTAGCTCTGCAAAGCCCCCTTTCCTTCTTGATCTGGTTGATTTCCCACTCCCTCAAACTTGACTTTGCTTTTTCTTTCTTTATAGTCATTAGACATTTGATAGTCAAGTCTCGCCCGACGAGTAAAGGATTGCATGTCAAGAGAAGTTTACTTGACGACTAAAAACCTCCCCGCTCTTCTCTCTGTTGGAATCTTCGTCTTG
Silene conica	1	cp	ATCGAAGAAGACGTACCGACCGGC	21-13	Silene_conica_mito_5	128180	A>C	ATCTTTTCTAAAGAGACAAGGAAGTGGGAATTGGGTGTATCTTGAACCTTGAGGGCGCGTTTCCGCTCTTCTTTCCCAAAGTACATTCATCACACCCACCACTTTCCAACCCAAATCCAAAGCTTTTAAAGATAGAGGTCGGGGGGAGTTGCCGATCG
Silene conica	3	mt	ACAACCAAAAGTTGTTACTCCCAT	22-20	Silene_conica_mito_5	128180	A>C	TAGGATGCCCCGAGGGCAGAAACCTTTGCTGATGCGAAGAGTCTTTCCCTGCTGCGGATGAAAGAGGGCTCTTCTCGAACCGCGCCCTATCTTTTCTAAAGAGACAAGGAAGTGGGAATTGGGTGTATCTTGAACCTTGAGGGCGCGTTTCCGCTCTTCTTTCCCAAAGTACATTCATCACACCCACCACTTTCCAACCCAAATCCAAAGCTTTTAAAGATAGAGGTCGGGGGGA
Silene conica	1	mt	ACTCTTATGCCGGGGAAAGTATAA	10-5	Silene_conica_mito_5	145223	A>G	TTTGTTGCGCCTAACTCCTCTACTTAGCAGCCGGGGCTAAATACTCTCCTCGTCTTCATCTTTCAGTCGCTCTTCGCTAACTCGTTAACATTCTTCGCTCGCTCTTCGCTAACCCCTTAACCTACGCTTCATTCTTGCCCTTATCCTTCTTCTTCTACTTCTACTCCTTCACGCACTTTCAAATCCAAGACCTATTCTACTGCCCCGATATGACTAAAGTCCACT
Silene conica	1	mt	CGGACGCATGAACGGGCCTCCAGA	18-14	Silene_conica_mito_5	145223	A>G	TTAGCAGCCGGGGCTAAATACTCTCCTCGTCTTCATCTTTCAGTCGCTCTTCGCTAACTCGTTAACATTCTTCGCTCGCTCTTCGCTAACCCCTTAACCTACGCTTCATTCTTGCCCTTATCCTTCTTCTTCTACTTCTACTCCTTCACGCACTTTCAAATCCAAGACC
Silene conica	3	mt	CTTATAAAAAGATTGCCGACACGC[R1]	22-17	Silene_conica_mito_5	145223	A>G	ACTCCTCTACTTAGCAGCCGGGGCTAAATACTCTCCTCGTCTTCATCTTTCAGTCGCTCTTCGCTAACTCGTTAACATTCTTCGCTCGCTCTTCGCTAACCCCTTAACCTACGCTTCATTCTTGCCCTTATCC
Silene conica	3	mt	TCAAATTCGGGTTGCCAGATAATA	31-8	Silene_conica_mito_50	83478	A>G	CTAAGAAGATTGTTGTGTGCCCCGATCATGCCTTGTAACAGAAGTCTCGTGTGCCGCTATATTATAATACAGTATATAGTAGCCTTAGATTAGGCATAAAAACCTTTTCGGGGCGAAGAACCTAAAACAAAAGTAAAAAAGAAATATCAAGGCTCAAGCCCTTATATAATAATATATAGCGGGTTCGGCGAAAGAG
Silene conica	1	cp	TAGCCGGCCCCGTGATCATATCCT	25-12	Silene_conica_mito_50	88353	A>G	CTTTACGGACGAAAGGTCTTCCGAGGCCCCTCCAACTAGACCTACTAGAAAAAGGAAGCTTTTCTTAAGAACACACCCCTAAGGTATCCTCGTTCATGAAAGAGCGGCTATTTAATCACCAGAATACTCGTAATATAACTTTCTCTGCAGCCGCATACGTTGCGCCGTAAATCCGTAGAGTGGATAAGGGGTG
Silene conica	3	mt	AATCTGATATAATTCTTGGGCTCC	15-10	Silene_conica_mito_51	5652	A>G	AGAGAAGCCAGCTACATCTCTTTCAGACTCGGGCAAGTGAGACCTAGCCCTTATAATAAAGAGCAGCTTATGCAAGAAATGCTAGGTCTGTAGATATCATAGAATCTCGTGAATCTGTAAAAATAGAAATCTTCTCAAATTCGCATTTTTTCCTATA
Silene conica	3	cp	AGCCTGACATTCCATGCACCATAA	7-7	Silene_conica_mito_51	80254	A>C	AACTCTTTACCCTCCCTCATGCCCTCTCTTTCTGAGACTTAAGTCAACTCCCACGACTCACACGCCAGAACTCTTTCAGTCTGTGGTTAATCCCCCATGTCCTCGGGTCAGTGGTAAGTCGAGAGCTG
Silene conica	2	cp	TGCCTTAAGGATTTACTTGGCACC	13-11	Silene_conica_mito_51	83245	A>G	AAGAGGTCATTTATTTAGCTCGAGCATAGCGAGAGGGATGAGACCAGATAGAGGGAAGGCTCAACTTCAGTATGAAGGATCAGTAAAAGAGGCTCGAGTTCTTACGAGAGGGTCGGGAATTGCCCCCTTTTTTTGAGCTCGCATAAAAAAGTACAAAAGCTTCCTAAAAGAAAAGGTTAGAAAGCGCCATGCTTGGGATGAA
Silene conica	2	cp	CACCTTGAAAGCCCCACTCGGCTC	14-8	Silene_conica_mito_52	57851	A>C	AAAGAAAAGAATCGATCGAATAGCTGCTGCCTTTGTCAACTTCATTCATCAGAAGGATGTACCTCAGTCTGAGCGGAAAAAGAGAGCTGGCGGGGAAAAAGGTTGTTAATAAGTTCTTAGATGTTTACGATGACTGTTGTACAAAGGGTCTATGTACATGATAATAGGTTGGGTGATCATCCTCATAAAGTCCAATGGAAGACCGTGCGATCTTTAAT
Silene conica	1	cp	AAGACGCACGGATCGCAACGAAAA[R2]	28-13	Silene_conica_mito_52	63121	A>G	TAGCAGTAGACTCCGCCCCCTCTCCTTGGCACTCGAGCCTAAACCCTCCACCTCGTCCCTCAGTAGAGCCTCCATCTTCCCTCTTATATCTTGGCAGTCTTTCTGATGGGTGATCATTTCTGCTATTCTGACT
Silene conica	1	cp	CATTGTATGCTACTCTCGCCCATA[R1]	25-16	Silene_conica_mito_52	63121	A>G	GAGCCTTTCTCCTCTCCTTCATTCTTCAACCTTCACCTATCTTCTCTACCTCGTACCTTAGCAGTAGACTCCGCCCCCTCTCCTTGGCACTCGAGCCTAAACCCTCCACCTCGTCCCTCAGTAGAGCCTCCAT
Silene conica	1	cp	CGATAATCGTGATCCGTTCACCTC	25-18	Silene_conica_mito_52	63121	A>G	CCTCGTACCTTAGCAGTAGACTCCGCCCCCTCTCCTTGGCACTCGAGCCTAAACCCTCCACCTCGTCCCTCAGTAGAGCCTCCATCTTCCCTCTTATATCTTGGCAGTCTTTCTGATGGGTGATCATTTCTGCTATTCTGACTTTTTCATAACGAGAAAACAAAAGAAAAG
Silene conica	1	mt	CTTCAAATAAAGGACAACAAGGAC[R2]	11-9	Silene_conica_mito_52	63121	A>G	CGTACCTTAGCAGTAGACTCCGCCCCCTCTCCTTGGCACTCGAGCCTAAACCCTCCACCTCGTCCCTCAGTAGAGCCTCCATCTTCCCTCTTATATCTTGGCAGTCTTTCTGATGGGTGATCATTTCTGCTAT
Silene conica	1	mt	AACCGACGGCATTACAACCCAGCT[R2]	15-10	Silene_conica_mito_52	63121	A>G	CTATCTTCTCTACCTCGTACCTTAGCAGTAGACTCCGCCCCCTCTCCTTGGCACTCGAGCCTAAACCCTCCACCTCGTCCCTCAGTAGAGCCTCCATCTTCCCTCTTATATCTTGGCAGTCTTTCTGATGGGT
Silene conica	1	mt	CCTTAGAGACAACCTTGCCTTGAA[R2]	17-11	Silene_conica_mito_52	63121	A>G	TCCTCTCCTTCATTCTTCAACCTTCACCTATCTTCTCTACCTCGTACCTTAGCAGTAGACTCCGCCCCCTCTCCTTGGCACTCGAGCCTAAACCCTCCACCTCGTCCCTCAGTAGAGCCTCCATCTTCCCTCT
Silene conica	1	mt	GACAATTTAACGGTCTTCGGGAAG	20-16	Silene_conica_mito_52	63121	A>G	CCTCTCCTTCATTCTTCAACCTTCACCTATCTTCTCTACCTCGTACCTTAGCAGTAGACTCCGCCCCCTCTCCTTGGCACTCGAGCCTAAACCCTCCACCTCGTCCCTCAGTAGAGCCTCCATCTTCCCTCTTATATCTTGGCAGTCTTTCTGATGGGTGATCATTTCTGCTATTCTGACTTTTTCATAACGAGAAAACAAAAGAAAAGAGAAAAGGACGGGATT
Silene conica	1	mt	CCTAATCCGCAAGTTTACCACGAG[R2]	19-11	Silene_conica_mito_52	63121	A>G	CCCTTTCGCTTTTCTCCGGGCTATCTCCTCTACTTAACAGTCGAGCCTTTCTCCTCTCCTTCATTCTTCAACCTTCACCTATCTTCTCTACCTCGTACCTTAGCAGTAGACTCCGCCCCCTCTCCTTGGCACT
Silene conica	2	cp	ATTCTTCCCGTGGCCAGTAACAAG	10-10	Silene_conica_mito_52	63121	A>G	CTTCATTCTTCAACCTTCACCTATCTTCTCTACCTCGTACCTTAGCAGTAGACTCCGCCCCCTCTCCTTGGCACTCGAGCCTAAACCCTCCACCTCGTCCCTCAGTAGAGCCTCCATCTTCCCTCTTATATCTTGGCAGTCTTTCTGATGGGTGATC
Silene conica	3	cp	GTAGCAGTGTCCTAAATCAGATGA	10-6	Silene_conica_mito_52	63121	A>G	CTTTTCTCCGGGCTATCTCCTCTACTTAACAGTCGAGCCTTTCTCCTCTCCTTCATTCTTCAACCTTCACCTATCTTCTCTACCTCGTACCTTAGCAGTAGACTCCGCCCCCTCTCCTTGGCACTCGAGCCTAAACCCTCCACCTCGTCCCTCAGTAGAGCCTCCATCTTCCCTCTTATATCTTGGCAGTCTTTCTGATGGGTGATCATTTCTGCTATTCTGACTTTTTCATAA
Silene conica	3	mt	AGCGACCGACCCTTGACGACTGGC	21-12	Silene_conica_mito_52	63121	A>G	ATTGTCCATTCGGTTTTTCTGATTTCATTAGAAGGAATTTCTTCTTGAACCAGCCTTCTCCCCGTCTCCTTGGCAGTCGCCCTTTCGCTTTTCTCCGGGCTATCTCCTCTACTTAACAGTCGAGCCTTTCTCCTCTCCTTCATTCTTCAACCTTCACCTATCTTCTCTACCTCGTACCTTAGCAGTAGACTCCGCCCCCTCTCCTTGGCACTCGAGCCTAAACCCTCCACCTC
Silene conica	3	mt	ATAGTTGCTATGGAAATAAAAGTA[R2]	23-23	Silene_conica_mito_52	63121	A>G	GCCCTTTCGCTTTTCTCCGGGCTATCTCCTCTACTTAACAGTCGAGCCTTTCTCCTCTCCTTCATTCTTCAACCTTCACCTATCTTCTCTACCTCGTACCTTAGCAGTAGACTCCGCCCCCTCTCCTTGGCAC
Silene conica	1	mt	AAAACCTTTTCGCTCATCTAAAGA[R1]	24-14	Silene_conica_mito_53	10365	A>C	AAGCTGAGTTCTCTTGGGAAGAAAAACAAAAAGAATACAAAAGAAAAGCCGAAGGCGAAACTGCGTAAAGAGAAGCAAGAAATGAATACGCGGATAAAGGCTCGACTAAAAGGCGAGGAAATAAGGAGAT
Silene conica	1	mt	TACATTACTTCCTTTTCCATAGAA	24-9	Silene_conica_mito_53	14740	A>C	GAATTCACTTTTCATATCTTTATATAAGAAAGAATTGAGCTTTTAATTTCACTTGAAACAACCCTAAGACGACAAAGCTCTCTTTGAGATTTCTTGCCTTTTTCATTTTCTACCCGGGTTTTGGAGCTTTGTTTTGTAATTGTATGGGCTTGACCGTATTATCTTCTTTCTTCGTATTCTGTTCGTCTCT
Silene conica	3	cp	GACGTCGACGCCTGTCCCGCACCA	10-7	Silene_conica_mito_53	27918	A>G	TGAAAGAAAGACTGAAGAATGAAGGAGCTAGGATAAGGCCGTTAAGTTGAGGATATAGCTCGAGCGATAGTATCCCTTTGGGATAAGGGGAGTTCCAAAAATAGACAAACCTACTAAGAGCAAAAGAGACAAGTAAAGTAAGA
Silene conica	1	cp	AGTACTAGTTGTTCCTCTTGATAT	14-10	Silene_conica_mito_53	36771	A>G	CATTGGACCAAACAAGCAGCGCGAACCAACATCAACAAAAGAAGAAGCGTCGATCCGAAGCTGAACAATCAAGGGGGCGAAAGACAACAAAGGAACACGAAAAAAGTACAATTCTAATCTTTCTCCTCCACT
Silene conica	1	mt	ACGAAAAGACCACGACCCCTGTCC	18-7	Silene_conica_mito_53	36771	A>G	AAAGAAACAACTAGATGCTAACCCAACTCTTAAAACCCTGTTGGAAACATTGGACCAAACAAGCAGCGCGAACCAACATCAACAAAAGAAGAAGCGTCGATCCGAAGCTGAACAATCAAGGGGGCGAAAGACAACAAAGGAACACGAAAAAAGTACAATTCTAATCTTTCTCCTCCACTTCGTACCTCAGCCGAGCCTATCTCCTGTTAGTCG
Silene conica	1	mt	ACTTGAAGGAAAGAATCGGAAATA[R1]	18-11	Silene_conica_mito_53	36771	A>G	CATTGGACCAAACAAGCAGCGCGAACCAACATCAACAAAAGAAGAAGCGTCGATCCGAAGCTGAACAATCAAGGGGGCGAAAGACAACAAAGGAACACGAAAAAAGTACAATTCTAATCTTTCTCCTCCACTT
Silene conica	1	mt	CTCAGAAGATGAGCGCCCCAGGCC[R2]	18-13	Silene_conica_mito_53	36771	A>G	AACATCAACAAAAGAAGAAGCGTCGATCCGAAGCTGAACAATCAAGGGGGCGAAAGACAACAAAGGAACACGAAAAAAGTACAATTCTAATCTTTCTCCTCCACTTCGTACCTCAGCCGAGCCTATCTCCTGT
Silene conica	1	mt	AGACTCACGAGACGATTGTCGTTG[R1]	9-9	Silene_conica_mito_53	36771	A>G	ATCAACAAAAGAAGAAGCGTCGATCCGAAGCTGAACAATCAAGGGGGCGAAAGACAACAAAGGAACACGAAAAAAGTACAATTCTAATCTTTCTCCTCCACTTCGTACCTCAGCCGAGCCTATCTCCTGTTAG
Silene conica	3	mt	AATCAAACCACCGCAGAAGCATGG[R2]	27-9	Silene_conica_mito_53	36771	A>G	TAGATGCTAACCCAACTCTTAAAACCCTGTTGGAAACATTGGACCAAACAAGCAGCGCGAACCAACATCAACAAAAGAAGAAGCGTCGATCCGAAGCTGAACAATCAAGGGGGCGAAAGACAACAAAGGAACA
Silene conica	3	cp	CAATACTCGCAGTTCCTACCCCTA	22-13	Silene_conica_mito_53	49928	A>G	CCTCTTTCGGTCAGTTACGATTCGGCACAAGAAATTAAACAGCAAAGTAATAGCTTGCAACCCTGACCTCTCTATTTTTTAGTTTGTGAATCTCTCTTTTCTAGGTTCCAGTGGAAAGGCCCAAAGTGGAGCACTTAAATTAACGTTTTAATGACCACCGCATTATGCAAGATCAAAGCGAAACTCCGAAAAGTATTATGAAACTGGCACGCACGTACA
Silene conica	3	mt	CATCTAAAGTAAGGCAAAAGTAGC	27-26	Silene_conica_mito_54	62618	A>T	TGAGATAGATGCTCCTCTATCTTGAACTGCCCCAGCCTGCTATCACTATGGAGCCGATCTCTCTCTTAGACTTTCTCTTCGTACGCCCTTCTACCTCCGCACCCCCTCTTTATCCTCCCCTTGGAAGTCGAGCCTAAATCCTCTCCTTTCAGCCGAACAGCTTCTTCTTCTGTCCGCGATCCCTTGAAAGAAGGGCATCT
Silene conica	3	mt	CAATTCCTAGACGATGCTGATTAC[R2]	22-6	Silene_conica_mito_55	25663	A>T	CGCGCAGACCGAATGAAATAGTAAAAAAGAAAAACTTCAAAGGTTCTAGAATATAAAGGCAAAGACGCTAACTCGAAGTCAGTCAACGCCCTACCCCTCTGGTTAAAAACCTTCGCCTTCTCCTCAACTTATC
Silene conica	1	cp	AAGACGATTTATTACATGCGCAAA[R1]	23-19	Silene_conica_mito_55	47506	A>G	CTTTAGTGCTATCTCTTCTCGCCGACGCCCGAGCCCCCTCACCTTATCCCCTCTTTGCAATCAAGTCTCTTTTCACTTTATAGTCTCGCCCCTTCCCCCTTGCAGTCGAACACACACCTACCTCGTGCCTCTT
Silene conica	1	cp	ACGTCTCTTGCGTGGGCTAGTTAT[R2]	24-15	Silene_conica_mito_55	47506	A>G	CCCCTCACCTTATCCCCTCTTTGCAATCAAGTCTCTTTTCACTTTATAGTCTCGCCCCTTCCCCCTTGCAGTCGAACACACACCTACCTCGTGCCTCTTACTACGCGCGAATTCGTCCCTCTCTCTTCAATCG
Silene conica	1	cp	AGTCCCACAGCCCGTGTTACGCCG[R1]	33-30	Silene_conica_mito_55	47506	A>G	CGAGCCCCCTCACCTTATCCCCTCTTTGCAATCAAGTCTCTTTTCACTTTATAGTCTCGCCCCTTCCCCCTTGCAGTCGAACACACACCTACCTCGTGCCTCTTACTACGCGCGAATTCGTCCCTCTCTCTTC
Silene conica	1	cp	CAAACTCAAAGCTCATCAAAGACA	27-16	Silene_conica_mito_55	47506	A>G	TATAGTCTCGCCCCTTCCCCCTTGCAGTCGAACACACACCTACCTCGTGCCTCTTACTACGCGCGAATTCGTCCCTCTCTCTTCAATCGAGGCTTAACCTTTATCTCCGCCTCTCCTTCTTATGGACAGAAAAAGCCAGAAGTGAAGGAGTTACTCAAGGTGGTACAGCTTGGGCTAGAGAACCTGTCGGGGAG
Silene conica	1	cp	CGACAGAGACGCTTGAATTTCAAA[R2]	15-15	Silene_conica_mito_55	47506	A>G	AGTCTCGCCCCTTCCCCCTTGCAGTCGAACACACACCTACCTCGTGCCTCTTACTACGCGCGAATTCGTCCCTCTCTCTTCAATCGAGGCTTAACCTTTATCTCCGCCTCTCCTTCTTATGGACAGAAAAAGC
Silene conica	1	cp	AAACTTAAAAACCCGAGTGGTTAC	27-15	Silene_conica_mito_55	47506	A>G	TCGCCCCTTCCCCCTTGCAGTCGAACACACACCTACCTCGTGCCTCTTACTACGCGCGAATTCGTCCCTCTCTCTTCAATCGAGGCTTAACCTTTATCTCCGCCTCTCCTTCTTATGGACAGAAAAAGCCAGAAGTGAAGGAGTTACTCAAGGTGGTACAGCTTGGGCTAGAGAACCTGTCGGGGAGAACACTATGACTGGTGGGCTTACATTCTTTTGTATTGA
Silene conica	1	mt	CGATTCTATAATCGCAGAGATATA[R1]	12-11	Silene_conica_mito_55	47506	A>G	AGTGCTATCTCTTCTCGCCGACGCCCGAGCCCCCTCACCTTATCCCCTCTTTGCAATCAAGTCTCTTTTCACTTTATAGTCTCGCCCCTTCCCCCTTGCAGTCGAACACACACCTACCTCGTGCCTCTTACTA
Silene conica	1	mt	CTTCCCTTTCATTCCCACAACTTT[R2]	16-12	Silene_conica_mito_55	47506	A>G	AGTGCTATCTCTTCTCGCCGACGCCCGAGCCCCCTCACCTTATCCCCTCTTTGCAATCAAGTCTCTTTTCACTTTATAGTCTCGCCCCTTCCCCCTTGCAGTCGAACACACACCTACCTCGTGCCTCTTACTA
Silene conica	1	mt	AGTAGAATATCCGTTCCCGAAGTG	19-7	Silene_conica_mito_55	47506	A>G	AAAGACGCGAGACCCTTTAGTGCTATCTCTTCTCGCCGACGCCCGAGCCCCCTCACCTTATCCCCTCTTTGCAATCAAGTCTCTTTTCACTTTATAGTCTCGCCCCTTCCCCCTTGCAGTCGAACACACACCTACCTCGTGCCTCTTACTACGCGCGAATTCGTCCCTCTCTCTTCAATCGAGGCTTAACCTTTATCTCCGCCTCTCCTTCTT
Silene conica	1	mt	CCAAGGACGGATCCATCACATTAT[R2]	21-6	Silene_conica_mito_55	47506	A>G	ATCCCCTCTTTGCAATCAAGTCTCTTTTCACTTTATAGTCTCGCCCCTTCCCCCTTGCAGTCGAACACACACCTACCTCGTGCCTCTTACTACGCGCGAATTCGTCCCTCTCTCTTCAATCGAGGCTTAACCT
Silene conica	1	mt	GAAACGTACTCGTAGAGCACCTCG[R1]	21-11	Silene_conica_mito_55	47506	A>G	CTCACCTTATCCCCTCTTTGCAATCAAGTCTCTTTTCACTTTATAGTCTCGCCCCTTCCCCCTTGCAGTCGAACACACACCTACCTCGTGCCTCTTACTACGCGCGAATTCGTCCCTCTCTCTTCAATCGAGG
Silene conica	1	mt	GCAAACGCCCCGTAGTCGGAAAGC	20-12	Silene_conica_mito_55	47506	A>G	CAAAGAAAGAAGAAAAGCTCAAAAGACGCGAGACCCTTTAGTGCTATCTCTTCTCGCCGACGCCCGAGCCCCCTCACCTTATCCCCTCTTTGCAATCAAGTCTCTTTTCACTTTATAGTCTCGCCCCTTCCCCCTTGCAGTCGAACACACACCTA
Silene conica	2	cp	ACCGCCCCAGCTGGTCGAATTAGG[R2]	12-8	Silene_conica_mito_55	47506	A>G	ATCAAGTCTCTTTTCACTTTATAGTCTCGCCCCTTCCCCCTTGCAGTCGAACACACACCTACCTCGTGCCTCTTACTACGCGCGAATTCGTCCCTCTCTCTTCAATCGAGGCTTAACCTTTATCTCCGCCTCT
Silene conica	3	mt	GCACTGCTTCATGGCACCACATTG[R1]	17-16	Silene_conica_mito_55	47506	A>G	CCCCTCACCTTATCCCCTCTTTGCAATCAAGTCTCTTTTCACTTTATAGTCTCGCCCCTTCCCCCTTGCAGTCGAACACACACCTACCTCGTGCCTCTTACTACGCGCGAATTCGTCCCTCTCTCTTCAATCG
Silene conica	3	mt	TCGGAGATGGGTTGAGGGCTTACA[R2]	28-25	Silene_conica_mito_55	47506	A>G	CTCAAAAGACGCGAGACCCTTTAGTGCTATCTCTTCTCGCCGACGCCCGAGCCCCCTCACCTTATCCCCTCTTTGCAATCAAGTCTCTTTTCACTTTATAGTCTCGCCCCTTCCCCCTTGCAGTCGAACACAC
Silene conica	1	cp	CAGCCTACGCGAGTCAATGACAAA[R2]	32-23	Silene_conica_mito_55	85325	A>G	GCCAAGAGAAGTGGCATCTTAAGACAAAGAGCAGCTCAAGCAAGAGGCAGAACATGAGGCCGAGAGATAGGCTAAGAGGTTAACGCGTTAGGCTAAACAAACTCGGCAAAATAGAGGCTAAAGTAAGAAGGCA
Silene conica	3	mt	ACAATTCAAAGTGACAAGCAGCTC[R1]	15-11	Silene_conica_mito_56	56486	A>G	CAAGAAAGGAAGACATTTGGCATATAAGAATGCCGCGGGTTGAGATTCCGATCCATACCCATGCATGCAAATGAGACGAGACGGCTTGTTCTAAACCAATCTAGTTTTTCTTGTAAGTGTGTAATCATGTCTC
Silene conica	1	cp	ATCATGCTGTTAGGATCCACCCTT[R2]	24-13	Silene_conica_mito_57	17098	A>G	TAGAGAGGACAAGACTGCCCGCGACAAGCGGCAGATGAAGACATAGATCAGCCCAATCCAAGTTAAATCAAGAAGAATGGATGAATTCTTTCTATTACCATATACGTATATAAGAATTTAGAATCAACCTCGT
Silene conica	1	cp	GCCCCACTGGGCTAGCCTCGACGT	17-16	Silene_conica_mito_57	17098	A>G	AGAGGACAAGACTGCCCGCGACAAGCGGCAGATGAAGACATAGATCAGCCCAATCCAAGTTAAATCAAGAAGAATGGATGAATTCTTTCTATTACCATATACGTATATAAGAATTTAGAATCAACCTCGTTTTTAGTATGCTCGAAGAGGCTTTTTTCAAGTCAGTTTGTGCTCTCTTTAA
Silene conica	1	cp	CGAAACACGACCCTAGAAATCAAA	26-25	Silene_conica_mito_57	17098	A>G	CTGCCCGCGACAAGCGGCAGATGAAGACATAGATCAGCCCAATCCAAGTTAAATCAAGAAGAATGGATGAATTCTTTCTATTACCATATACGTATATAAGAATTTAGAATCAACCTCGTTTTTAGTATGCTCGAAGAGGCTTTTTTCAAGTCAGTTT
Silene conica	1	mt	CATCGCTGCTAGGCAACCCCAATT	20-19	Silene_conica_mito_57	17098	A>G	TAGTTTGGTAGCTTTTATTGCATTTTTTCGCTTAAATTCTTGCATTTTTTTTTGAAAAGTGGCATCTACTTGAAAAGTGAGAGTAGAGAGGACAAGACTGCCCGCGACAAGCGGCAGATGAAGACATAGATCAGCCCAATCCAAGTTAAATCAAGAAGAATGGATGAATTCTTTCTATT
Silene conica	1	mt	CAGATGTGCTATCTTAGCAAAACC	28-17	Silene_conica_mito_57	17098	A>G	AGTTGAAGCAAGAGAGGCTTAATTGGTTGAAACAAACTTATTTAATTCAGCGTGTTTCGCTCTTTTTATCCTTCTTTCGTCTTAGTTTGGTAGCTTTTATTGCATTTTTTCGCTTAAATTCTTGCATTTTTTTTTGAAAAGTGGCATCTACTTGAAAAGTGAGAGTAGAGAGGACAAGACTGCCCGCGACAAGCGGCAGATGAAGACATAGATCAGCC
Silene conica	2	cp	ACAGCAACAAAACTAGATAGTTAA[R1]	13-7	Silene_conica_mito_57	17098	A>G	CTGCCCGCGACAAGCGGCAGATGAAGACATAGATCAGCCCAATCCAAGTTAAATCAAGAAGAATGGATGAATTCTTTCTATTACCATATACGTATATAAGAATTTAGAATCAACCTCGTTTTTAGTATGCTCG
Silene conica	3	cp	CATTGATCGCAGTTGAGCTTTTGG	9-7	Silene_conica_mito_57	17098	A>G	AAGTGAGAGTAGAGAGGACAAGACTGCCCGCGACAAGCGGCAGATGAAGACATAGATCAGCCCAATCCAAGTTAAATCAAGAAGAATGGATGAATTCTTTCTATTACCATATACGTATATAAGAATTTAGAATCAACCTCGTTTTTAGTATGCTCGAAGAGGCTTTTTTCAAG
Silene conica	3	cp	ACAGCGTGAAGTGATATAATGAGC[R2]	18-5	Silene_conica_mito_57	17098	A>G	TGAAAAGTGGCATCTACTTGAAAAGTGAGAGTAGAGAGGACAAGACTGCCCGCGACAAGCGGCAGATGAAGACATAGATCAGCCCAATCCAAGTTAAATCAAGAAGAATGGATGAATTCTTTCTATTACCATA
Silene conica	3	cp	ACCAAAATCTACGCGTGTCGCTTT	11-3	Silene_conica_mito_57	17098	A>G	CTTGCATTTTTTTTTGAAAAGTGGCATCTACTTGAAAAGTGAGAGTAGAGAGGACAAGACTGCCCGCGACAAGCGGCAGATGAAGACATAGATCAGCCCAATCCAAGTTAAATCAAGAAGAATGGATGAATTCTTTCTATT
Silene conica	3	cp	AGAGCGATATGGGACTCGGACTGA[R1]	9-9	Silene_conica_mito_57	17098	A>G	CTTGAAAAGTGAGAGTAGAGAGGACAAGACTGCCCGCGACAAGCGGCAGATGAAGACATAGATCAGCCCAATCCAAGTTAAATCAAGAAGAATGGATGAATTCTTTCTATTACCATATACGTATATAAGAATT
Silene conica	3	cp	ATTCCTCGCATTGTAAAAAAACAA[R1]	25-11	Silene_conica_mito_57	17098	A>G	TACTTGAAAAGTGAGAGTAGAGAGGACAAGACTGCCCGCGACAAGCGGCAGATGAAGACATAGATCAGCCCAATCCAAGTTAAATCAAGAAGAATGGATGAATTCTTTCTATTACCATATACGTATATAAGAA
Silene conica	3	cp	CAATATCCGAATTAACAGCAACTA[R1]	11-9	Silene_conica_mito_57	17098	A>G	CCGCGACAAGCGGCAGATGAAGACATAGATCAGCCCAATCCAAGTTAAATCAAGAAGAATGGATGAATTCTTTCTATTACCATATACGTATATAAGAATTTAGAATCAACCTCGTTTTTAGTATGCTCGAAGA
Silene conica	3	mt	AATGCTCTGGTCGTATACATTTAT	16-15	Silene_conica_mito_57	17098	A>G	CATCTACTTGAAAAGTGAGAGTAGAGAGGACAAGACTGCCCGCGACAAGCGGCAGATGAAGACATAGATCAGCCCAATCCAAGTTAAATCAAGAAGAATGGATGAATTCTTTCTATTACCATATACGTATATAAGAATTTAGAATCAACCTCGTTTTTAGTATGCTCGAAGAGGCTTTTTTCAAGTCAGTTTGTGCTCTCTTTAATTGTAACTGATAATCCTAGAATCCC
Silene conica	1	cp	CCCGACCTCGCTTTAATAATACGC	22-18	Silene_conica_mito_57	29076	A>G	TAGGGAAGTGCAACCGTAAGTTGAAGAATAAGGGGGGCTTTAGGCCCGAGTGCTGCTTTCTAAGTCGAGTTCCCTTGTAAAGAGTGAGCTTGCTTCCTTTTCATCTCTGCTAAAGAGAGTGCATTAGGGAAGTCAAGTAGATCTAAGTAAGGGCGAGTGCTAGTGAGACAGGGAGTCGACTGACAAGGAGCGTAGCCTTGTTCAACCTGAAGTGGTACTCGATCGAG
Silene conica	1	cp	AGGCCCGTAAGTCACCCGTCACTT	22-20	Silene_conica_mito_57	29076	A>G	TGCTTTGTTCCTTGGTCGGAAGTTGCTTCAACTCGAAAAAGAGGCCACTGTCTATAGAAGAGTCAAGTGTAATGGGAGGAGCAAGGAAGACAGAGGTAAGTGCACCCCGTTGAAGAAGGTTCGAAGAAGAGAGAGTCAAGTAGGCTGTCTCGTCCTTAATCATCTAGGGAAGTGCAACCGTAAGTTGAAGAATAAGGGGGGCTTTAGGCCCGAGTGCTGCTTTCTAAGT
Silene conica	1	mt	GCAGAGATCACGGTACAAAAAAGG[R2]	22-15	Silene_conica_mito_57	29076	A>G	CAGAGGTAAGTGCACCCCGTTGAAGAAGGTTCGAAGAAGAGAGAGTCAAGTAGGCTGTCTCGTCCTTAATCATCTAGGGAAGTGCAACCGTAAGTTGAAGAATAAGGGGGGCTTTAGGCCCGAGTGCTGCTTT
Silene conica	2	cp	AACCTTAAAAAAGAAGTAGCAATC	21-9	Silene_conica_mito_57	29076	A>G	AGAGTCAAGTGTAATGGGAGGAGCAAGGAAGACAGAGGTAAGTGCACCCCGTTGAAGAAGGTTCGAAGAAGAGAGAGTCAAGTAGGCTGTCTCGTCCTTAATCATCTAGGGAAGTGCAACCGTAAGTTGAAGAATAAGGGGGGCTTTAGGCCCGAGTGCTGCTTTCTAAGTCGAGTTCCCTTGTAAAGAGTGA
Silene conica	3	cp	AACCCCTGACAATAAAGTTATATG[R2]	19-5	Silene_conica_mito_57	29076	A>G	GAAGTGCAACCGTAAGTTGAAGAATAAGGGGGGCTTTAGGCCCGAGTGCTGCTTTCTAAGTCGAGTTCCCTTGTAAAGAGTGAGCTTGCTTCCTTTTCATCTCTGCTAAAGAGAGTGCATTAGGGAAGTCAAG
Silene conica	3	cp	CAGCTCTACTAACTTATTTAGTAA	10-10	Silene_conica_mito_57	29076	A>G	AGGTTCGAAGAAGAGAGAGTCAAGTAGGCTGTCTCGTCCTTAATCATCTAGGGAAGTGCAACCGTAAGTTGAAGAATAAGGGGGGCTTTAGGCCCGAGTGCTGCTTTCTAAGTCGAGTTCCCTTGTAAAGAGTG
Silene conica	3	cp	CTGACCGCTAATGTCTACGGAATG[R1]	15-5	Silene_conica_mito_57	29076	A>G	AAGACAGAGGTAAGTGCACCCCGTTGAAGAAGGTTCGAAGAAGAGAGAGTCAAGTAGGCTGTCTCGTCCTTAATCATCTAGGGAAGTGCAACCGTAAGTTGAAGAATAAGGGGGGCTTTAGGCCCGAGTGCTG
Silene conica	3	cp	GTAAAGAATGTGTTGGTAGAAACT	13-12	Silene_conica_mito_57	29076	A>G	GCACCCCGTTGAAGAAGGTTCGAAGAAGAGAGAGTCAAGTAGGCTGTCTCGTCCTTAATCATCTAGGGAAGTGCAACCGTAAGTTGAAGAATAAGGGGGGCTTTAGGCCCGAGTGCTGCTTTCTAAGTCGAGTTCCCTTGTAAAGAGTGAGCTTGCTTCCTTTTCATCTCTGCTAAAGAGAGTGCATTAGG
Silene conica	3	cp	CCCAACACACTAGAAATTAATCCG	11-5	Silene_conica_mito_57	29076	A>G	AATCATCTAGGGAAGTGCAACCGTAAGTTGAAGAATAAGGGGGGCTTTAGGCCCGAGTGCTGCTTTCTAAGTCGAGTTCCCTTGTAAAGAGTGAGCTTGCTTCCTTTTCATCTCTGCTAAAGAGAGTGCATTAGGGAAGTCAAGTAGATCT
Silene conica	3	cp	CCGCGAATCCGATCACGCGGCCAC[R2]	13-9	Silene_conica_mito_57	29076	A>G	CCGTTGAAGAAGGTTCGAAGAAGAGAGAGTCAAGTAGGCTGTCTCGTCCTTAATCATCTAGGGAAGTGCAACCGTAAGTTGAAGAATAAGGGGGGCTTTAGGCCCGAGTGCTGCTTTCTAAGTCGAGTTCCCT
Silene conica	3	mt	AAACCTAGGAACTACCATATTATA[R2]	21-18	Silene_conica_mito_57	29076	A>G	AGTGCACCCCGTTGAAGAAGGTTCGAAGAAGAGAGAGTCAAGTAGGCTGTCTCGTCCTTAATCATCTAGGGAAGTGCAACCGTAAGTTGAAGAATAAGGGGGGCTTTAGGCCCGAGTGCTGCTTTCTAAGTCG
Silene conica	3	mt	AACGATTAAATTTAAACGTGAAAG[R1]	26-14	Silene_conica_mito_57	29076	A>G	CCGTTGAAGAAGGTTCGAAGAAGAGAGAGTCAAGTAGGCTGTCTCGTCCTTAATCATCTAGGGAAGTGCAACCGTAAGTTGAAGAATAAGGGGGGCTTTAGGCCCGAGTGCTGCTTTCTAAGTCGAGTTCCCT
Silene conica	3	mt	AGAATTAATCCATGTGAAAGACAC[R1]	22-15	Silene_conica_mito_57	29076	A>G	CACCCCGTTGAAGAAGGTTCGAAGAAGAGAGAGTCAAGTAGGCTGTCTCGTCCTTAATCATCTAGGGAAGTGCAACCGTAAGTTGAAGAATAAGGGGGGCTTTAGGCCCGAGTGCTGCTTTCTAAGTCGAGTT
Silene conica	3	mt	CCCTAAAGTACAGCCGTCATGTTC[R2]	18-14	Silene_conica_mito_57	29076	A>G	GAGGTAAGTGCACCCCGTTGAAGAAGGTTCGAAGAAGAGAGAGTCAAGTAGGCTGTCTCGTCCTTAATCATCTAGGGAAGTGCAACCGTAAGTTGAAGAATAAGGGGGGCTTTAGGCCCGAGTGCTGCTTTCT
Silene conica	3	mt	CACCGCTTAACGCTACAAAGGTCT	23-17	Silene_conica_mito_57	29076	A>G	GAGGCCACTGTCTATAGAAGAGTCAAGTGTAATGGGAGGAGCAAGGAAGACAGAGGTAAGTGCACCCCGTTGAAGAAGGTTCGAAGAAGAGAGAGTCAAGTAGGCTGTCTCGTCCTTAATCATCTAGGGAAGTGCAACCGTAAGTTGAAGAATAAGGGGGGCTTTAGGCCCGAGTGCTGCTTTCTAAGTCGAGTTCCCTTGTAAAGAGTG
Silene conica	3	mt	CATACGGGAACTTTTGAGAAGAGA	29-17	Silene_conica_mito_57	29076	A>G	TGTCTCGTCCTTAATCATCTAGGGAAGTGCAACCGTAAGTTGAAGAATAAGGGGGGCTTTAGGCCCGAGTGCTGCTTTCTAAGTCGAGTTCCCTTGTAAAGAGTGAGCTTGCTTCCTTTTCATCTCTGCTAAAGAGAGTGCATTAGGGAAGTCAAGTAGATCTAAGTAAGGGCGAGTGCTA
Silene conica	3	mt	CCACGGAAAGATGCCCCGCGCTTG[R2]	22-11	Silene_conica_mito_57	29076	A>G	TTGAAGAATAAGGGGGGCTTTAGGCCCGAGTGCTGCTTTCTAAGTCGAGTTCCCTTGTAAAGAGTGAGCTTGCTTCCTTTTCATCTCTGCTAAAGAGAGTGCATTAGGGAAGTCAAGTAGATCTAAGTAAGGG
Silene conica	3	mt	TAATAACATGCGTCCATCCGCCGA[R1]	20-15	Silene_conica_mito_57	29076	A>G	CGTCCTTAATCATCTAGGGAAGTGCAACCGTAAGTTGAAGAATAAGGGGGGCTTTAGGCCCGAGTGCTGCTTTCTAAGTCGAGTTCCCTTGTAAAGAGTGAGCTTGCTTCCTTTTCATCTCTGCTAAAGAGAG
Silene conica	3	mt	CCACGGAAAGATGCCCCGCGCTTG[R1]	22-11	Silene_conica_mito_57	29076	A>G	GAGCAAGGAAGACAGAGGTAAGTGCACCCCGTTGAAGAAGGTTCGAAGAAGAGAGAGTCAAGTAGGCTGTCTCGTCCTTAATCATCTAGGGAAGTGCAACCGTAAGTTGAAGAATAAGGGGGGCTTTAGGCCC
Silene conica	1	cp	AAGACGAAGATTTCTCACTTTGGC	22-18	Silene_conica_mito_57	57658	A>C	CTTCGATTCTAATCTTTCGAAGGAAGGCCACCTTAGAGGGGGAATCTTTTAGTAGCAAACTCGCTAGTACTAGGCTGGCTTCTCTGGATGTGGTGGAAAGAGATTCACAGCTGATAGAGTTTCTATTCGCTCTCTTCTATGGATTGACGGATTTCTTTATCTGTACTCTCTTTAAAGAAGTAAGAATTATAATGTAACGAGG
Silene conica	1	mt	AATTTATACAGCACCACGAATTAC[R2]	19-17	Silene_conica_mito_57	57658	A>C	CTTTCGAAGGAAGGCCACCTTAGAGGGGGAATCTTTTAGTAGCAAACTCGCTAGTACTAGGCTGGCTTCTCTGGATGTGGTGGAAAGAGATTCACAGCTGATAGAGTTTCTATTCGCTCTCTTCTATGGATTG
Silene conica	1	mt	AAGATTAGCCTCTTTTGCGTGGGG	16-6	Silene_conica_mito_57	57658	A>C	AGAGATTCACAGCTGATAGAGTTTCTATTCGCTCTCTTCTATGGATTGACGGATTTCTTTATCTGTACTCTCTTTAAAGAAGTAAGAATTATAATGTAACGAGGGAAGGGAGTTGAGCTCGTTAGTCTTA
Silene conica	2	cp	CCCCACGCAGGTCCCTGAGAACTC[R1]	19-19	Silene_conica_mito_57	57658	A>C	AACTCGCTAGTACTAGGCTGGCTTCTCTGGATGTGGTGGAAAGAGATTCACAGCTGATAGAGTTTCTATTCGCTCTCTTCTATGGATTGACGGATTTCTTTATCTGTACTCTCTTTAAAGAAGTAAGAATTAT
Silene conica	3	cp	CACGAATATCCAGAGTCTAATTTT	10-5	Silene_conica_mito_57	57658	A>C	GAGGGGGAATCTTTTAGTAGCAAACTCGCTAGTACTAGGCTGGCTTCTCTGGATGTGGTGGAAAGAGATTCACAGCTGATAGAGTTTCTATTCGCTCTCTTCTATGGATTGACGGATTTCTTTATCTGTACTCTCTTTAAAGAAGTAAGAATTATAATGTAACGAGGGAAGGGAGTTGAGCTCGTTAGTCTTACCCC
Silene conica	3	cp	CCACCCTAACGCTAAAACGCACGT[R1]	18-6	Silene_conica_mito_57	57658	A>C	TAGTAGCAAACTCGCTAGTACTAGGCTGGCTTCTCTGGATGTGGTGGAAAGAGATTCACAGCTGATAGAGTTTCTATTCGCTCTCTTCTATGGATTGACGGATTTCTTTATCTGTACTCTCTTTAAAGAAGTA
Silene conica	3	cp	ACTAGAGAGAGAGCGAGAAAGGAA	17-6	Silene_conica_mito_57	57658	A>C	AAGTCTTCGATTCTAATCTTTCGAAGGAAGGCCACCTTAGAGGGGGAATCTTTTAGTAGCAAACTCGCTAGTACTAGGCTGGCTTCTCTGGATGTGGTGGAAAGAGATTCACAGCTGATAGAGTTTCTATTCGCTCTCTTCTATGGATTGACGGATTTCTTTATCTGTACTCTCTTTAAAGAAGTAAGAATTATAATGTAACGAGGGAAGGGAGTTGAGCT
Silene conica	3	cp	CAACAGGCCCCACCCTGGCATGCC	18-7	Silene_conica_mito_57	57658	A>C	CTTCGATTCTAATCTTTCGAAGGAAGGCCACCTTAGAGGGGGAATCTTTTAGTAGCAAACTCGCTAGTACTAGGCTGGCTTCTCTGGATGTGGTGGAAAGAGATTCACAGCTGATAGAGTTTCTATTCGCTCTCTTCTATGGATTGACGGATTTCTTTATCT
Silene conica	3	cp	CGCGAGGGACCCGCGACACTCCGT	15-8	Silene_conica_mito_57	57658	A>C	CTTTTAGTAGCAAACTCGCTAGTACTAGGCTGGCTTCTCTGGATGTGGTGGAAAGAGATTCACAGCTGATAGAGTTTCTATTCGCTCTCTTCTATGGATTGACGGATTTCTTTATCTGTACTCTCTTTAAAGAAGTAAGAATTATAATGTAACGAGGGAAGGGAGTTGAGCTCGTTAGTCTTACCCCGCCCCCTTCCTTTTAGGTGGAACGTCTGAAG
Silene conica	3	cp	CTTACCGGAGCTTCAGACACCTAA[R2]	12-3	Silene_conica_mito_57	57658	A>C	AGGGGGAATCTTTTAGTAGCAAACTCGCTAGTACTAGGCTGGCTTCTCTGGATGTGGTGGAAAGAGATTCACAGCTGATAGAGTTTCTATTCGCTCTCTTCTATGGATTGACGGATTTCTTTATCTGTACTCT
Silene conica	3	mt	CGACAAATCTTTCGCACAGGCCTG[R1]	13-12	Silene_conica_mito_57	57658	A>C	CCACCTTAGAGGGGGAATCTTTTAGTAGCAAACTCGCTAGTACTAGGCTGGCTTCTCTGGATGTGGTGGAAAGAGATTCACAGCTGATAGAGTTTCTATTCGCTCTCTTCTATGGATTGACGGATTTCTTTAT
Silene conica	3	mt	CGGTCGCAATTATAGGTATAAATG[R1]	20-12	Silene_conica_mito_57	57658	A>C	CGAAGGAAGGCCACCTTAGAGGGGGAATCTTTTAGTAGCAAACTCGCTAGTACTAGGCTGGCTTCTCTGGATGTGGTGGAAAGAGATTCACAGCTGATAGAGTTTCTATTCGCTCTCTTCTATGGATTGACGG
Silene conica	3	cp	GATCAGACCTCCTTTCGCACAAGA[R2]	11-9	Silene_conica_mito_57	60611	A>C	CCCCTCTAAGTTATATTAGTGAGCAATCTGCGCATGGACAATTCTCCAATCTGTCTTCCCAAAAGCATGGTGGAGTATATATATCTCCTTCACCCCCTTGTTCTGGCCCTAAGAAAAGGGGTTTTGCTCTTCT
Silene conica	3	mt	AACCCAAGAGGCCCGCCCCACAAC	21-16	Silene_conica_mito_57	60611	A>C	AAATAGCCCTCTTTAGTGTATAATAGCTGCTTCATCCGGACTTCTTTATTTAGTTGTTCACCCTTATTTATTTAAGTCTTACACAACCTTTTATAGTCCATCTGCTTCCCCCTCTAAGTTATATTAGTGAGCAATCTGCGCATGGACAATTCTCCAATCTGTCTTCCCAAAAGCATGGTGGAGTATATATATCTCCTTCACCCCCTTGTTCTGGCCC
Silene conica	3	mt	ATCCGTAAACGGTCCTAGAAACCT[R1]	15-12	Silene_conica_mito_57	78670	A>C	AATCCTTCCCGTCGAGTAGTAACTTTCCCTAATCGAAGAAGCCATGCCCATAGACATGGGGAAAGACTCTTGAGACAGGCGGGCAAGTACAGTCAGGGGCAATCTTCTAAAGAAGTTAGTACGAGAAGGGCGC
Silene conica	3	mt	GAAAATTTGAATTACGCAAATAAC	16-14	Silene_conica_mito_58	27544	C>T	CAACCACTATCAAGTAGATGCTGATTTACACACTTAGAGAACAACCTTAATCAAAGGGCCTCCAAAAGATTTGAGTATCCATCCTTGCTTTTTGGAAACAAAATACGGCAACGAAGGGCATAGGCTCCATAAACGTTTTTAAGAAAGG
Silene conica	1	cp	CAGACTGCCCGCCCCAATCGCCAA[R1]	19-18	Silene_conica_mito_58	82638	A>G	AATCCAGGTCCAAGTGCATGCGCTTCCATTTTGTAAGATCCGGGTCTATAGTTGTTCACACGGACGCATTAATCTAACCGCACCCACGGCAGCAGCCCCTCACTTAGAGAGCATAGATAAGCCCGAAAGAAAG
Silene conica	1	cp	CGCTCGAACGAATACCTTCAGAGA	28-17	Silene_conica_mito_58	82638	A>G	GTCTGATCGATCCGACGTAGAATCTTTAGACCTCGCTTAAACAAGTGAGGAAAGGCGAAGAATCCAGGTCCAAGTGCATGCGCTTCCATTTTGTAAGATCCGGGTCTATAGTTGTTCACACGGACGCATTAATCTAACCGCACCCACGGCAGCAGCCCCTCACTTAG
Silene conica	1	mt	ACCCTCATGCTATGAACTACACCG[R2]	18-14	Silene_conica_mito_58	82638	A>G	CTTAAACAAGTGAGGAAAGGCGAAGAATCCAGGTCCAAGTGCATGCGCTTCCATTTTGTAAGATCCGGGTCTATAGTTGTTCACACGGACGCATTAATCTAACCGCACCCACGGCAGCAGCCCCTCACTT
Silene conica	1	mt	CTATAGAACAACCTCACCAACTCA[R2]	14-11	Silene_conica_mito_58	82638	A>G	TCTTTAGACCTCGCTTAAACAAGTGAGGAAAGGCGAAGAATCCAGGTCCAAGTGCATGCGCTTCCATTTTGTAAGATCCGGGTCTATAGTTGTTCACACGGACGCATTAATCTAACCGCACCCACGGCAGCAG
Silene conica	2	cp	AACCATCCCCTGCCAGGTTGCACA	23-10	Silene_conica_mito_58	82638	A>G	AAGACTGTCTGATCGATCCGACGTAGAATCTTTAGACCTCGCTTAAACAAGTGAGGAAAGGCGAAGAATCCAGGTCCAAGTGCATGCGCTTCCATTTTGTAAGATCCGGGTCTATAGTTGTTCACACGGACGCATTAATCTAACCGCACCCACGGCAGCAGCCCCTCACTTAGAGAGCATAGATAAG
Silene conica	2	cp	ACGAACGTAAAATGGGCCGCTAGC[R2]	9-3	Silene_conica_mito_58	82638	A>G	CAGGTCCAAGTGCATGCGCTTCCATTTTGTAAGATCCGGGTCTATAGTTGTTCACACGGACGCATTAATCTAACCGCACCCACGGCAGCAGCCCCTCACTTAGAGAGCATAGATAAGCCCGAAAGAAAGCTGC
Silene conica	2	cp	CAAACCCACCCGGGACGATCACAT	15-11	Silene_conica_mito_58	82638	A>G	AAACAAGTGAGGAAAGGCGAAGAATCCAGGTCCAAGTGCATGCGCTTCCATTTTGTAAGATCCGGGTCTATAGTTGTTCACACGGACGCATTAATCTAACCGCACCCACGGCAGCAGCCCCTCACTTAGAGAGCATAGATAAGCCCGAAAGAAAGCTGCAGCCTCTCTATTTGAAA
Silene conica	3	cp	AACATTAAGCATCTGGTTGACTCT[R1]	8-6	Silene_conica_mito_58	82638	A>G	TAGACCTCGCTTAAACAAGTGAGGAAAGGCGAAGAATCCAGGTCCAAGTGCATGCGCTTCCATTTTGTAAGATCCGGGTCTATAGTTGTTCACACGGACGCATTAATCTAACCGCACCCACGGCAGCAGCCCC
Silene conica	3	mt	CATTGGATAGAAGATTCATATGAT[R2]	21-16	Silene_conica_mito_58	82638	A>G	GACGTAGAATCTTTAGACCTCGCTTAAACAAGTGAGGAAAGGCGAAGAATCCAGGTCCAAGTGCATGCGCTTCCATTTTGTAAGATCCGGGTCTATAGTTGTTCACACGGACGCATTAATCTAACCGCACCCA
Silene conica	3	mt	CGTAGTAAACACTTTACTAATCAT	20-14	Silene_conica_mito_58	82638	A>G	CTTAGCTCGACCTCGTCCCTTTTCTTACCTACCCTCTGTCTGTGAACTCTTATCTTATAATGTTATATCTTAAAGACTGTCTGATCGATCCGACGTAGAATCTTTAGACCTCGCTTAAACAAGTGAGGAAAGGCGAAGAATCCAGGTCCAAGTGCATGCGCTTCCATTTTGTAAGATCCGGGTCTATAGTTGTTCACACGGACGCATTAATCTAACCGCACCCACGGCAGCAGCCC
Silene conica	3	mt	CCAAAAAGACGAGTTCCCTTTACC[R2]	28-20	Silene_conica_mito_58	82638	A>G	ATCCAGGTCCAAGTGCATGCGCTTCCATTTTGTAAGATCCGGGTCTATAGTTGTTCACACGGACGCATTAATCTAACCGCACCCACGGCAGCAGCCCCTCACTTAGAGAGCATAGATAAGCCCGAAAGAAAGC
Silene conica	3	mt	GGGTGACTCAATTGAAAACGGATC[R1]	26-19	Silene_conica_mito_58	82638	A>G	AAAGGCGAAGAATCCAGGTCCAAGTGCATGCGCTTCCATTTTGTAAGATCCGGGTCTATAGTTGTTCACACGGACGCATTAATCTAACCGCACCCACGGCAGCAGCCCCTCACTTAGAGAGCATAGATAAGCC
Silene conica	2	cp	GTCTCTAGCACATCTGCAGAAGAC[R2]	11-6	Silene_conica_mito_59	10438	A>G	GAACGCACAAACTCGCAGGAATGATTGTTATGCCTCATCCCCGCGCGCCCCATCTCCTTTCGTGAAATAGTAGGAACACACGACCCTTCCTTATCCTTGTTAAAGCGCAAATCCCTGTCTTTCTTTAAACAAG
Silene conica	2	cp	GCGACGTCCACTGCTCCCTGGGCT[R2]	10-9	Silene_conica_mito_59	10438	A>G	AACTCGCAGGAATGATTGTTATGCCTCATCCCCGCGCGCCCCATCTCCTTTCGTGAAATAGTAGGAACACACGACCCTTCCTTATCCTTGTTAAAGCGCAAATCCCTGTCTTTCTTTAAACAAGGAATGAGAG
Silene conica	3	cp	GATAACTAATAGTCCACCCACAAC	7-7	Silene_conica_mito_59	10438	A>G	CCTTAACGGGCGCACAAGCGGGGGTCTTAGCTCATGAACGCACAAACTCGCAGGAATGATTGTTATGCCTCATCCCCGCGCGCCCCATCTCCTTTCGTGAAATAGTAGGAACACACGACCCTTCCTTATCCTTGTTAAAGCGCAAATCCCTGTCTTTCTTTAAACAAGGAATGAGAGTCTCCGCTGTAAGAAACTGG
Silene conica	3	mt	ATTATAAAGAACGTCCCCGCTATC[R1]	29-17	Silene_conica_mito_59	10438	A>G	TATCCCTTAACGGGCGCACAAGCGGGGGTCTTAGCTCATGAACGCACAAACTCGCAGGAATGATTGTTATGCCTCATCCCCGCGCGCCCCATCTCCTTTCGTGAAATAGTAGGAACACACGACCCTTCCTTAT
Silene conica	3	mt	ACAAGAGTTCTATCATCCAAAGCT[R1]	16-14	Silene_conica_mito_59	16320	A>G	TACCGGGATTACAAAAAGTCTTTCGCATCAACAAGGTAGGCGGGTGTGTCATTCTAGTGTCGTCTCACTCTACTTATCTAAACACAAGCACTTCTTTACCAAAAAGTTTTCACCAGAAGGCGCAAGAGCTCAT
Silene conica	3	mt	CAACCCCCGTCCTAAACGCGAAAA[R1]	22-9	Silene_conica_mito_59	16320	A>G	GAAAAAGACAAAAGAAAAGTACACCTAGTGCTAAGCCCACTAACCCTAACCCTTATACCTACCGGGATTACAAAAAGTCTTTCGCATCAACAAGGTAGGCGGGTGTGTCATTCTAGTGTCGTCTCACTCTACT
Silene conica	3	mt	CCATCGAAGATCTAAAAACGATAA[R2]	18-15	Silene_conica_mito_59	63522	C>T	CAGTTCAAAGTTGAGTCTTTTTGTGCCCTCTTTTCCTTGTGTATTTTTTCTTATGGTTTTTTGAAGAAGCCGATCAGATCATTTTGCTCCACTAAACACCCTTATCCAGAGACTCTCTCGGGAGTCAGTTCTT
Silene conica	2	cp	AAATGTAGGCAACCGACCCGGTTA	14-12	Silene_conica_mito_59	73660	A>G	AGTCGAGTCATTTTATAGCTCTTTAAAAACTTCGTCCAGTTACGAAAGATAAAAGGCCGAACGGAAGACCCAAGCGTATAAGTGCATCCTCCCCTCTCCTCAAGAGACCTCTCCTAGTTCTAATTCACTCAAAGAGGACACAGAAACTGGAGAAATGAAGAAAGGCTTATACGTATATAAGAATGAAGATTTAAATCTTCTCCGTCTCTAGCCCGTTTAGTTAGGGGTGTAC
Silene conica	2	cp	CATACTCGACCCGTCGACAAGAAC	21-14	Silene_conica_mito_59	73660	A>G	CCCTCTCCTCAAGAGACCTCTCCTAGTTCTAATTCACTCAAAGAGGACACAGAAACTGGAGAAATGAAGAAAGGCTTATACGTATATAAGAATGAAGATTTAAATCTTCTCCGTCTCTAGCCCGTTTAGTTAGGGGTGTACTAGCTGAACTCTGAGGAACTTCTAATCAAGAACCCCCCAACCGCTTATCAGGCTCCCTGGGGAGTGGCCT
Silene conica	1	mt	CGGAAAGTGAGAGATGCCCGACGA	28-23	Silene_conica_mito_59	82528	A>T	GTCTAGATCTAGAAAGTGTGCCGCACGCTCTTGATAAGCATAGTTCTCTAAGAGAGGCTGATTCTCTTACCTATTGTAACTGAGTCTCTTTTTCTTCTCTTTTTTCTGTATCAAGACGCCTATCCTCGCCCGAAAGTTTTTCTTCTTTTTGGTAGGCTGCTAAAGGCGGAGTCTCGCTTTTCTTTCTCACCCGGGAATT
Silene conica	1	mt	AAAACTATCTGATCGCAACTGCAT	14-13	Silene_conica_mito_6	75857	A>C	ATATCACGATCAAAGAAGAATTCTTTTAACTCTTGATGAACGGAAAGGCAGTAAGGAGCCCCTTGCTATAGCAAAACGCGCGTTAAAGCTGTCCCCGGCTCCTCTGCTTGCTTTATCATGTCATAGAGTCTCCCTCGTAATGGCCAGAGGGACGCAGCCTTTTCCCTTTCCACTA
Silene conica	3	mt	CCTTCCCCTACGGTCACTAAACTC	26-23	Silene_conica_mito_6	127112	A>G	GACCTTTGTGTTAACTAGTTAGCGAGGATAGGGGGTGAAAAGACTCGAGAAGAGTGTGATCCTTTCTCTGCTGCTTTGGTTCTCTTTCTCGGACTCTTTCTCGTAGACATGAACTGGCAAAGTTGATCTTCCTCTCTTCCTTTGTTCATGGGGTGAAGAG
Silene conica	1	cp	CCGCTAGCATGAGTAGGCTCTCAA[R1]	27-23	Silene_conica_mito_61	631	A>T	AATTTGAAGTTCAATTAATTCCTGCTCTTCGGCAATATAGAAGAAGCGACTGCTCGCGATGTTACTTAACTAACTTAGGGTTAAGAGCTGCTTAGGAAGAGGGAAGGTACTTGATTGAGGGATAACTGCAATG
Silene conica	1	cp	AACAGACATCCGATTGCTAAACTA	22-13	Silene_conica_mito_61	631	A>T	CGACAAGAGCTACTTCGCTGGCAGGTAGAGGGGGATAAGCTTGAACGGGAGAATTTGAAGTTCAATTAATTCCTGCTCTTCGGCAATATAGAAGAAGCGACTGCTCGCGATGTTACTTAACTAACTTAGGGTTAAGAGCTGCTTAGGAAGAGGGAAGGTACTTGATTGAGGG
Silene conica	1	mt	AGACCAATGAATCACACGAACTTT[R1]	16-5	Silene_conica_mito_61	631	A>T	TGAAGTTCAATTAATTCCTGCTCTTCGGCAATATAGAAGAAGCGACTGCTCGCGATGTTACTTAACTAACTTAGGGTTAAGAGCTGCTTAGGAAGAGGGAAGGTACTTGATTGAGGGATAACTGCAATGGAAA
Silene conica	1	mt	CAACAGGCTTCCCGCGGATCATAA	26-22	Silene_conica_mito_61	631	A>T	TAATTCCTGCTCTTCGGCAATATAGAAGAAGCGACTGCTCGCGATGTTACTTAACTAACTTAGGGTTAAGAGCTGCTTAGGAAGAGGGAAGGTACTTGATTGAGGGATAACTGCAATGGAAAGAAGTCGCTGAACTAATTAGACTCTAGG
Silene conica	1	mt	AACGCACTGAATAATACTGATTCT[R2]	24-10	Silene_conica_mito_61	631	A>T	AATTTGAAGTTCAATTAATTCCTGCTCTTCGGCAATATAGAAGAAGCGACTGCTCGCGATGTTACTTAACTAACTTAGGGTTAAGAGCTGCTTAGGAAGAGGGAAGGTACTTGATTGAGGGATAACTGCAATG
Silene conica	1	mt	ATATGAAGGTGGTGATTTACTATT[R1]	14-12	Silene_conica_mito_61	631	A>T	GTTCAATTAATTCCTGCTCTTCGGCAATATAGAAGAAGCGACTGCTCGCGATGTTACTTAACTAACTTAGGGTTAAGAGCTGCTTAGGAAGAGGGAAGGTACTTGATTGAGGGATAACTGCAATGGAAAGAAG
Silene conica	1	mt	GGTAGTTAATATTTTGCCCGGAGA[R1]	20-15	Silene_conica_mito_61	631	A>T	GCAATATAGAAGAAGCGACTGCTCGCGATGTTACTTAACTAACTTAGGGTTAAGAGCTGCTTAGGAAGAGGGAAGGTACTTGATTGAGGGATAACTGCAATGGAAAGAAGTCGCTGAACTAATTAGACTCTAG
Silene conica	1	mt	AGCACCAAAGATCATACGAAAGGC[R2]	28-14	Silene_conica_mito_61	631	A>T	AGCTTGAACGGGAGAATTTGAAGTTCAATTAATTCCTGCTCTTCGGCAATATAGAAGAAGCGACTGCTCGCGATGTTACTTAACTAACTTAGGGTTAAGAGCTGCTTAGGAAGAGGGAAGGTACTTGATTGAG
Silene conica	2	cp	AATTAGACACTGGAGATTACCTGA	11-8	Silene_conica_mito_61	631	A>T	AGACATTATCGACAAGAGCTACTTCGCTGGCAGGTAGAGGGGGATAAGCTTGAACGGGAGAATTTGAAGTTCAATTAATTCCTGCTCTTCGGCAATATAGAAGAAGCGACTGCTCGCGATGTTACTTAACTAACTTAGGGTTAAGAGCTGCTTAGGAAGAGGGAAGGTACTTGATTGAGGGATAACTGCAATGGAA
Silene conica	2	cp	CAAGGCGATGGGTTAAAACGCCAA[R2]	16-9	Silene_conica_mito_61	631	A>T	AATTAATTCCTGCTCTTCGGCAATATAGAAGAAGCGACTGCTCGCGATGTTACTTAACTAACTTAGGGTTAAGAGCTGCTTAGGAAGAGGGAAGGTACTTGATTGAGGGATAACTGCAATGGAAAGAAGTCGC
Silene conica	2	cp	CTCATCACACTCGCGCGCGCCGAA	6-6	Silene_conica_mito_61	631	A>T	CTTCGCTGGCAGGTAGAGGGGGATAAGCTTGAACGGGAGAATTTGAAGTTCAATTAATTCCTGCTCTTCGGCAATATAGAAGAAGCGACTGCTCGCGATGTTACTTAACTAACTTAGGGTTAAGAGCTGCTTAGGAAGAGGGAAGGTACTTGATTGAGGGATAACTGCA
Silene conica	2	cp	CCCTTTTACAAGCGCCCGGTCAAT[R1]	11-10	Silene_conica_mito_61	631	A>T	CTTGAACGGGAGAATTTGAAGTTCAATTAATTCCTGCTCTTCGGCAATATAGAAGAAGCGACTGCTCGCGATGTTACTTAACTAACTTAGGGTTAAGAGCTGCTTAGGAAGAGGGAAGGTACTTGATTGAGGG
Silene conica	3	mt	AGGCTCATGAACGAGAGATGCTGC	19-16	Silene_conica_mito_61	631	A>T	GTAGAAAGCAGAACGCAAGCAAGAACAACAGACATTATCGACAAGAGCTACTTCGCTGGCAGGTAGAGGGGGATAAGCTTGAACGGGAGAATTTGAAGTTCAATTAATTCCTGCTCTTCGGCAATATAGAAGAAGCGACTGCTCGCGATGTTACTTAACTAACTTAGGGTTAAGAGCTGCTTAGGAAGAGGGAAGGTACTTGATTGAGGGATAACT
Silene conica	3	mt	CGCCTATTTCAACTTAATTAAATG[R1]	21-19	Silene_conica_mito_61	631	A>T	CGGCAATATAGAAGAAGCGACTGCTCGCGATGTTACTTAACTAACTTAGGGTTAAGAGCTGCTTAGGAAGAGGGAAGGTACTTGATTGAGGGATAACTGCAATGGAAAGAAGTCGCTGAACTAATTAGACTCT
Silene conica	2	cp	CAGATAAACTACCTTTCCTTAGTA	12-10	Silene_conica_mito_61	4085	A>G	CAACCTCGCCCCTTACCCTTTTGTCCTCCCCTTTGCCTTACGATTTCACCTCTCTTTGTCAAATGTGCCGTAAAGAAAGCAAAGTACAAAGCAACGCGCGTCTAAGATAGAAAGAGAAGAAGTCAAGTCTGAATAATAGGGTTCTTTAAATTGAATTACGAGCCCAAATCAAAACTGGATATGCA
Silene conica	2	cp	GCGAATTTTTGCGGGCGCCCTTAC	9-6	Silene_conica_mito_61	4085	A>G	TCTACGGGCGAGAAAAAGATAAAGAGAGCAGCAGAGAAAGGGAGATACCCAAGTAAGAGAAGCTAGTACAACCAACCTCGCCCCTTACCCTTTTGTCCTCCCCTTTGCCTTACGATTTCACCTCTCTTTGTCAAATGTGCCGTAAAGAAAGCAAAGTACAAAGCAACGCGCGTCTAA
Silene conica	2	cp	AAATGTCAAGTTCAGCGTCTCTTG[R2]	9-5	Silene_conica_mito_61	4085	A>G	AGAAGGAAAGTCTAACCGCAGTCTACGGGCGAGAAAAAGATAAAGAGAGCAGCAGAGAAAGGGAGATACCCAAGTAAGAGAAGCTAGTACAACCAACCTCGCCCCTTACCCTTTTGTCCTCCCCTTTGCCTTA
Silene conica	3	cp	CCATCATAGCCCTACGACTCATAG[R2]	13-11	Silene_conica_mito_61	4085	A>G	GAAGCTAGTACAACCAACCTCGCCCCTTACCCTTTTGTCCTCCCCTTTGCCTTACGATTTCACCTCTCTTTGTCAAATGTGCCGTAAAGAAAGCAAAGTACAAAGCAACGCGCGTCTAAGATAGAAAGAGAAG
Silene conica	3	cp	AACGTGGAAAGGCAAAAGGGTTAA[R1]	10-7	Silene_conica_mito_61	4085	A>G	AAGAGAGCAGCAGAGAAAGGGAGATACCCAAGTAAGAGAAGCTAGTACAACCAACCTCGCCCCTTACCCTTTTGTCCTCCCCTTTGCCTTACGATTTCACCTCTCTTTGTCAAATGTGCCGTAAAGAAAGCAA
Silene conica	3	mt	AAACAATAGCTAGTTGGGCCGAGA[R2]	18-14	Silene_conica_mito_61	4085	A>G	GCAGAGAAAGGGAGATACCCAAGTAAGAGAAGCTAGTACAACCAACCTCGCCCCTTACCCTTTTGTCCTCCCCTTTGCCTTACGATTTCACCTCTCTTTGTCAAATGTGCCGTAAAGAAAGCAAAGTACAAAG
Silene conica	3	mt	AATAGGACTAACAGTGAAAAAGGG[R1]	22-18	Silene_conica_mito_61	4085	A>G	TAAGAGAAGCTAGTACAACCAACCTCGCCCCTTACCCTTTTGTCCTCCCCTTTGCCTTACGATTTCACCTCTCTTTGTCAAATGTGCCGTAAAGAAAGCAAAGTACAAAGCAACGCGCGTCTAAGATAGAAAG
Silene conica	3	mt	AAGTGCTCAAGTTCTAGGAATTAA	26-10	Silene_conica_mito_61	4085	A>G	AAGAGAAGCTAGTACAACCAACCTCGCCCCTTACCCTTTTGTCCTCCCCTTTGCCTTACGATTTCACCTCTCTTTGTCAAATGTGCCGTAAAGAAAGCAAAGTACAAAGCAACGCGCGTCTAAGATAGAAAGAGAAGAAGTCA
Silene conica	1	mt	CCGAAATTTAATTCCAGGGACCCA[R2]	16-7	Silene_conica_mito_61	72869	A>G	ATCTCTATCATTGCATATTAGCACATAAAAGCCAAAGAAAAAAACACATGACCAGAAGAATTGAGTAAAATATGTGAATTGATCGAGTTGGGGCGTATTAAAATTTGCTTTTATTTATAGACCCTCGCTCTCG
Silene conica	1	cp	GATTTTTACTCTGGAGAACGCAAG	26-7	Silene_conica_mito_63	5156	C>A	AAGTCAAGCAAGGTTTGGGTGCGTGCTATATGGGAGGGACGGGGCGGGCAGTCTGGATGATACAGAGCCGGGGTATAGACATTGGTGCGGAGAGTTCATTGGGCGCGAAGTGGAGGAGAAGACGATGAAGCAGATTAAGAAAAAGCTTCAGAGCCTCAAGAAGAGTAAGAGGGATCAATCC
Silene conica	1	cp	CCAGTTGGCCTAGACCGGCAAAAC[R1]	27-13	Silene_conica_mito_63	5156	C>A	ATCCGATTACTTTGGACTGTGACTTATAGCTTCTCTGTCTTCTTGTCCTCTTTCCTTCGTGCTTCTTGTCTTGCTTCTCTTGATGGAGGAGGAAGAGAAAAAAGATACAAGTCAAGCAAGGTTTGGGTGCGTG
Silene conica	1	mt	GAGATTTATATCGATTTAAATAAA	22-8	Silene_conica_mito_63	5156	C>A	AGGAGGAAGAGAAAAAAGATACAAGTCAAGCAAGGTTTGGGTGCGTGCTATATGGGAGGGACGGGGCGGGCAGTCTGGATGATACAGAGCCGGGGTATAGACATTGGTGCGGAGAGTTCATTGGGCGCGAAGTGGAGGAGAAGACGATGAAGCAGATTAAGAAAAAGCTTCAGAGCCTCAAGAAGAGTAAGAGGGATCAATCCC
Silene conica	3	cp	GCCCCCGACTACTATGAAAGCTCC	9-7	Silene_conica_mito_63	5156	C>A	AAAAAGATACAAGTCAAGCAAGGTTTGGGTGCGTGCTATATGGGAGGGACGGGGCGGGCAGTCTGGATGATACAGAGCCGGGGTATAGACATTGGTGCGGAGAGTTCATTGGGCGCGAAGTGGAGGAGAAGACGATGAAGCAGATTAAGAAAAAGCTTCAGAG
Silene conica	3	cp	CCCGCAAAGCATTAAATTTAAAAC	7-7	Silene_conica_mito_63	60364	A>G	TGAAAATGCGTGAAATTGATACAAGAAAAAGAAAGAAAAACGCAAGATAAAATAGAGCGCAAACTAGGCAAAAGAGATAGTAAGGGCCTGGAAGGAGCTCGACTGCCAAGGAGAATAGAGAAAAATGCTCAAAAATGCGTTTAATCTTATATGTATATAAGAGGCTTTGGGTTTGATACGAATTTAAGTATGCTCGAGTCT
Silene conica	3	cp	GACGCGACTAGCTTCCGCCGGGCT[R2]	13-13	Silene_conica_mito_63	60364	A>G	TGATACAAGAAAAAGAAAGAAAAACGCAAGATAAAATAGAGCGCAAACTAGGCAAAAGAGATAGTAAGGGCCTGGAAGGAGCTCGACTGCCAAGGAGAATAGAGAAAAATGCTCAAAAATGCGTTTAATCTTA
Silene conica	3	cp	ATACGAATTTATCTCAGACACGAC[R1]	13-12	Silene_conica_mito_63	60364	A>G	TACAAAGAAAGGAAAGTCAAGAAAGCATTGGGTTTCATGTCAAATTTCTGTGTGCGAGAAAGCTGAAAATGCGTGAAATTGATACAAGAAAAAGAAAGAAAAACGCAAGATAAAATAGAGCGCAAACTAGGCA
Silene conica	1	mt	GACCCGTCTCTGGTGACGTCAGGT	27-14	Silene_conica_mito_63	69512	A>G	TCGTAGTCAGTCGCCCCTATCTTAGGAAAACCGGGTAGTGAGCCAAAGAGCAGAGTTGGATCCAATACAGTTCGTCTTGTTTATGCATTAACCAATAGAAGCTTTTCTTAAACTACCCTCTCTCCCTATGGAAAATAGAGCTATTTAAACCTCGCCTCATCGCTGCGCTCGAGTCTCAGCTCTCTCCCCTCCCGTCGGTCTACCTCTCTTCTCTCCCCTTCTAGTATCGATCCCAC
Silene conica	3	mt	CACACCAAACCAGTAACGTCCAGA[R1]	10-9	Silene_conica_mito_63	69512	A>G	CAAGAGAGATCTCACGAGGCTGGTAAAGACAAGGAAAAAGAGGAGTCTTCGTAGTCAGTCGCCCCTATCTTAGGAAAACCGGGTAGTGAGCCAAAGAGCAGAGTTGGATCCAATACAGTTCGTCTTGTTTATG
Silene conica	1	cp	CCGGTCATTTGTCCTCGCCTGCGA	18-17	Silene_conica_mito_64	43342	A>G	AGAAGATAGGAATCCTCCTGTTTTTATAGAGAATAGAAGCTTCGTCGCCTAGTTTATCTCGATCAGCGGATCACCCTTTCCTTTTGACACACACACAGCCCTGTGGATATCATCAGATAAAAACGTTTTAGATTCTGACAGTTATCTATGTTCGACAGAGAGAAAATGGG
Silene conica	1	mt	CTGACTGGAACTTCCGGCTTTTCA	22-18	Silene_conica_mito_64	43342	A>G	GGACAAGATAGTAGTGGCTGATGGTTTCACCGAGGTAGTAAAAGAAGATAGGAATCCTCCTGTTTTTATAGAGAATAGAAGCTTCGTCGCCTAGTTTATCTCGATCAGCGGATCACCCTTTCCTTTTGACACACACACAGCCCTGTGGATATCATCAGATAAAAACGTTTTAGATTCTGACAGTTATCTATGTTCGACAGAGAGAAAATGGGGCAGTCTCTGTATAAATG
Silene conica	3	cp	TAATATTGATATTTCTATGGACCA	10-4	Silene_conica_mito_64	43342	A>G	GAGAAGTGAATCCTCGGGTTTTCCTTCTTTGAATTCTTAAAGCTTCAAAAGGAAAGACTCCTTCTTCTTTAATTTGTAAGTGTAATCTTTCCCCTTTGTTGTCAGAAAGGACAAGATAGTAGTGGCTGATGGTTTCACCGAGGTAGTAAAAGAAGATAGGAATCCTCCTGTTTTTATAGAGAATAGAAGCTTCGTCGCCTAGTTTATCTCGATCAGCGGATCACCCTT
Silene conica	3	mt	CTAACGCTTAGAGAATCACAGATC[R1]	11-9	Silene_conica_mito_64	43342	A>G	AGAGAATAGAAGCTTCGTCGCCTAGTTTATCTCGATCAGCGGATCACCCTTTCCTTTTGACACACACACAGCCCTGTGGATATCATCAGATAAAAACGTTTTAGATTCTGACAGTTATCTATGTTCGACAGAG
Silene conica	3	mt	TACCAACAAGATTCCTACGATCCC[R1]	19-17	Silene_conica_mito_64	43342	A>G	TAAAAGAAGATAGGAATCCTCCTGTTTTTATAGAGAATAGAAGCTTCGTCGCCTAGTTTATCTCGATCAGCGGATCACCCTTTCCTTTTGACACACACACAGCCCTGTGGATATCATCAGATAAAAACGTTTT
Silene conica	1	cp	CAAATGATACCTCAATTAATTAGC[R1]	27-12	Silene_conica_mito_64	44698	A>T	GTCTCCGTCTTTTTGTCGTGCGTGTGATCCTATTCTTTATTATAAGAGGGAGAGTAGTCTTTATTAAACTTACAGGGGAGAAGAAAGAGCATAGAGTTTTTCTTTCAAGGCTCTAAGCGAACGCGAGACATAG
Silene conica	3	mt	CGACGACACCATCTCCCAGATCAC	24-18	Silene_conica_mito_64	51643	A>G	TACTTTACAAAGGATGCATGTGGCTACTTACTTTATGTTTATGGACAAGACCCATCTTCCATTTAGATTAGTGGAGAAGTAGGTCGTTGGACACTTATGCTCATGAGACTAACTCTTCTCTTTAACCCCCTAACCTAATAAATTTCACTTGGTGCTATATGCTTGCTTATTTTACTTTTCTTTGTTGTAACCTCACGC
Silene conica	1	mt	CCCCGGCGGACTCTAAAAACACGA[R2]	20-10	Silene_conica_mito_64	68705	A>G	TTTCGGACACGAATTAATTGGTCAAAGACGCACATTGGAGGAGTTATTCTGTGCTCTTGACACCCAGCCAGCCCTCGCATTAGGCTTGAAATATAGGGCAGACTCGCACACTACACTAAACTCTACCTACCCA
Silene conica	1	cp	CTGCTCACAACCTACTCCGTTACT[R2]	33-21	Silene_conica_mito_65	64336	A>G	CTTCCAAAAGAAAGAGAATGGGGCGAACGAACAACAGACCTATCTAAAATAAATGGGCGAGGATCCCGACCAGCCAAACAGAGTCTCCACCCGCTATATCCACTCCTACCATTAGTGATCAAACCTAGT
Silene conica	1	mt	CAACAGGCCCGCGATTTAAATATA[R2]	19-7	Silene_conica_mito_65	64336	A>G	AAGAGAATGGGGCGAACGAACAACAGACCTATCTAAAATAAATGGGCGAGGATCCCGACCAGCCAAACAGAGTCTCCACCCGCTATATCCACTCCTACCATTAGTGATCAAACCTAGTGAACTCGCCTTTCCA
Silene conica	1	mt	GTATCCCAAAAATGACACATCATA[R1]	22-12	Silene_conica_mito_65	64336	A>G	CTAAAATAAATGGGCGAGGATCCCGACCAGCCAAACAGAGTCTCCACCCGCTATATCCACTCCTACCATTAGTGATCAAACCTAGTGAACTCGCCTTTCCACTTTTTAAATATTTAGCTTTTTAGCTATTCAT
Silene conica	1	mt	CCTTTCGGGACGCTGCACTTCTCT[R1]	25-13	Silene_conica_mito_65	64336	A>G	AGGATCCCGACCAGCCAAACAGAGTCTCCACCCGCTATATCCACTCCTACCATTAGTGATCAAACCTAGTGAACTCGCCTTTCCACTTTTTAAATATTTAGCTTTTTAGCTATTCATCTACCTACACCTACGG
Silene conica	2	cp	ACCTCTAGAACCCTCAATACTGCG[R1]	10-9	Silene_conica_mito_65	64336	A>G	TGGGGCGAACGAACAACAGACCTATCTAAAATAAATGGGCGAGGATCCCGACCAGCCAAACAGAGTCTCCACCCGCTATATCCACTCCTACCATTAGTGATCAAACCTAGTGAACTCGCCTTTCCACTTTTTA
Silene conica	2	cp	CTGCGTAGAGAAGCTCAGGCCCCG[R1]	13-12	Silene_conica_mito_65	64336	A>G	ACAATCTCTTCCAAAAGAAAGAGAATGGGGCGAACGAACAACAGACCTATCTAAAATAAATGGGCGAGGATCCCGACCAGCCAAACAGAGTCTCCACCCGCTATATCCACTCCTACCATTAGTGATCAAACCT
Silene conica	2	cp	ATGCTCCTCACTTGGTACACGAGA[R2]	21-14	Silene_conica_mito_65	64336	A>G	CAACAGACCTATCTAAAATAAATGGGCGAGGATCCCGACCAGCCAAACAGAGTCTCCACCCGCTATATCCACTCCTACCATTAGTGATCAAACCTAGTGAACTCGCCTTTCCACTTTTTAAATATTTAGCTTT
Silene conica	2	cp	CAAAAAACGATGGACTACGGCACG	17-8	Silene_conica_mito_65	64336	A>G	ATTGCTCTTTGTGAACAATCTCTTCCAAAAGAAAGAGAATGGGGCGAACGAACAACAGACCTATCTAAAATAAATGGGCGAGGATCCCGACCAGCCAAACAGAGTCTCCACCCGCTATATCCACTCCTACCATTAGTGATCAAACCTAGTG
Silene conica	3	cp	AGAGTCATCCTACTTTTTAGCCTC	9-6	Silene_conica_mito_65	64336	A>G	GAGGATCCCGACCAGCCAAACAGAGTCTCCACCCGCTATATCCACTCCTACCATTAGTGATCAAACCTAGTGAACTCGCCTTTCCACTTTTTAAATATTTAGCTTTTTAGCTATTCATCTACCTACACCTACGGGCACAAGTCTTCCTTTATCAGCATCATCT
Silene conica	3	cp	ACAAAGAGGTATCCCCTCAATCCG	19-15	Silene_conica_mito_65	64336	A>G	CAGCCAAACAGAGTCTCCACCCGCTATATCCACTCCTACCATTAGTGATCAAACCTAGTGAACTCGCCTTTCCACTTTTTAAATATTTAGCTTTTTAGCTATTCATCTACCTACACCTACGGGCACAAGTCTTCCTTTATC
Silene conica	3	cp	ACCGCCCCAGGCGATTTGTGAGGT	14-6	Silene_conica_mito_65	64336	A>G	GTCTTTAGTCGGCACGGATGATTGCTCTTTGTGAACAATCTCTTCCAAAAGAAAGAGAATGGGGCGAACGAACAACAGACCTATCTAAAATAAATGGGCGAGGATCCCGACCAGCCAAACAGAGTCTCCACCCGCTATATCCACTCCTACCATTAGTGATCAAACCTAGTGAACTCGCCTTTCCACTTTTTAAATATTTAGCTTTTTAGCTATTCATCTACCTACACCTA
Silene conica	3	cp	AGTTCGGTCACAGCATCGCAGATC[R2]	9-4	Silene_conica_mito_65	64336	A>G	CGACCAGCCAAACAGAGTCTCCACCCGCTATATCCACTCCTACCATTAGTGATCAAACCTAGTGAACTCGCCTTTCCACTTTTTAAATATTTAGCTTTTTAGCTATTCATCTACCTACACCTACGGGCACAAG
Silene conica	3	mt	AAGACCAAACTGTTCTTGGGATGT	17-16	Silene_conica_mito_65	64336	A>G	AATGGGCGAGGATCCCGACCAGCCAAACAGAGTCTCCACCCGCTATATCCACTCCTACCATTAGTGATCAAACCTAGTGAACTCGCCTTTCCACTTTTTAAATATTTAGCTTTTTAGCTATTCATCTACCTACACCTACGGGCACAAGTCTTCCTTTATCAGCATCATCTACCGCTATGCGAACTTTGAGGAAAGTGGGGCAAGAGCGACGGTCAACATGTCTA
Silene conica	3	mt	GGCTGGCTTTAGTTGTGTATCACA	18-16	Silene_conica_mito_65	64336	A>G	ATGATTGCTCTTTGTGAACAATCTCTTCCAAAAGAAAGAGAATGGGGCGAACGAACAACAGACCTATCTAAAATAAATGGGCGAGGATCCCGACCAGCCAAACAGAGTCTCCACCCGCTATATCCACTCCTACCATTAGTGATCAAACCTAGTGAACTCGCCTTTCCA
Silene conica	1	mt	CTACATGTAAGCCTCCGCATATCA	18-10	Silene_conica_mito_65	79897	A>C	AGGAGGCTCGACTGCCAAGGAGAGGAGGTATAGTAGAGATGAGAGAGCCTTCGGTGTTAGAAGAAGTGCTTCTTTTATGTAGCTAGCTTGTGTTTTTAACTTCCCTCTTTGCTCCCGACTTAATGTGTTTTGATCTTGTTTTAGTCTTGTCTTGTCCTATCTTCAGAGGTCCTTCTCTCTTTCGGGTTCAGCTATGATTCCTTCTCTTTCTTGTCAGAGCTTGCAT
Silene conica	1	mt	CATCAATTCATTGGTTTCTCGATA[R1]	15-11	Silene_conica_mito_66	42627	A>T	AAGACTTTTTCCATTCATCTATCCTTCTCGAGTGGAATACCTAATAGCCGCGCTTGTGTCTGCAAATAGAAGTCTATCATCCCCTGCCGTTGCACATCTACTGTGTTATCAGTAAAGATAGGAATTGACTTCT
Silene conica	1	mt	CATCCATCTTATCCGATTCACGAC	9-8	Silene_conica_mito_66	42627	A>T	CAAGGCTTGGGAACTTGACCCTTTTTGCATGGAAGAAAAGATGTCAAAATATAAGAGAAAGCAAATGGAAGCTTTAAGACTTTTTCCATTCATCTATCCTTCTCGAGTGGAATACCTAATAGCCGCGCTTGTGTCTGCAAATAGAAG
Silene conica	2	cp	CAGCCGCACACCGCTCGTGCTTTC[R2]	11-4	Silene_conica_mito_66	42627	A>T	AATGGAAGCTTTAAGACTTTTTCCATTCATCTATCCTTCTCGAGTGGAATACCTAATAGCCGCGCTTGTGTCTGCAAATAGAAGTCTATCATCCCCTGCCGTTGCACATCTACTGTGTTATCAGTAAAGATAG
Silene conica	2	cp	CTCTGTTCTGTTTCGGACTGATTG[R1]	13-8	Silene_conica_mito_66	42627	A>T	ATAAGAGAAAGCAAATGGAAGCTTTAAGACTTTTTCCATTCATCTATCCTTCTCGAGTGGAATACCTAATAGCCGCGCTTGTGTCTGCAAATAGAAGTCTATCATCCCCTGCCGTTGCACATCTACTGTGTTA
Silene conica	3	mt	GAGCTACCATCAGTTACTTACCTG[R1]	20-14	Silene_conica_mito_66	42627	A>T	AGGCTTGGGAACTTGACCCTTTTTGCATGGAAGAAAAGATGTCAAAATATAAGAGAAAGCAAATGGAAGCTTTAAGACTTTTTCCATTCATCTATCCTTCTCGAGTGGAATACCTAATAGCCGCGCTTGTGTC
Silene conica	3	cp	CAGACTACACCAGACGTATTTGGA[R1]	15-10	Silene_conica_mito_66	53501	A>T	GAATAAGAAGTAGGGTTTTGAGCTCATAACCGGGCTCAGTCCTTAAACTACCTTCCATCCTAAGGAAACAAGTTGGGTGAGAATGTGGAGAAAAGAAAGAGAGAAAGACTTTATAGAGATATTCAGAGAGGCG
Silene conica	1	cp	ACGTCACAAAAGGACTCGAGCATG[R1]	23-19	Silene_conica_mito_66	74991	A>G	TAGTTGGTTGAAACGGACAAATTGAAGAGTGGAGATACAAGTCCAATAGGAAGGCAAAGACAAGGAGAAAGTGAAAAATCAAATGGGGAGGGGCATGCCCCAGGCAAGGTGCCTGAAGGAGATTCATCTGTCG
Silene conica	1	mt	GAATCCTAACCCGTATGCTGGCCG[R1]	20-13	Silene_conica_mito_66	74991	A>G	AAAATCAAATGGGGAGGGGCATGCCCCAGGCAAGGTGCCTGAAGGAGATTCATCTGTCGACCAAAAGGAGAGGGGGCCGCTCCAACCAATATAACCGGATTAACTATATCCAATCTTGACTTCTAAGATATGT
Silene conica	3	cp	ACTCATCTTCCCTGCGATAAATCG[R2]	12-10	Silene_conica_mito_66	74991	A>G	TCCAATAGGAAGGCAAAGACAAGGAGAAAGTGAAAAATCAAATGGGGAGGGGCATGCCCCAGGCAAGGTGCCTGAAGGAGATTCATCTGTCGACCAAAAGGAGAGGGGGCCGCTCCAACCAATATAACCGGAT
Silene conica	3	cp	GAATAAAGAACATTTTCATCAGGA[R1]	11-3	Silene_conica_mito_66	74991	A>G	AAATCAAATGGGGAGGGGCATGCCCCAGGCAAGGTGCCTGAAGGAGATTCATCTGTCGACCAAAAGGAGAGGGGGCCGCTCCAACCAATATAACCGGATTAACTATATCCAATCTTGACTTCTAAGATATGTT
Silene conica	3	cp	ATTAAACACCCTGTCTTATATATG[R1]	6-4	Silene_conica_mito_67	19314	A>G	ATCGCCCAAGTATAAACCGGCGTCTTCTACTACGCGAGAACCACTTTACCAGAGCCATACAGACCCTAGATTAGACGCTGCTGGATGGGTTTCTTGGACTGGGTTTTTAGGTTCTTCTTCTTTCGTCATACCT
Silene conica	1	cp	ATATGTCCGGATCATAAGTGAATT[R2]	33-14	Silene_conica_mito_67	48502	A>G	AAGAGGGGAGCCCCCTTCTACTCTTATTAAGCAGTCGAGCCTATCTCTTTGTCAGTCGACCCTCTCTCTCCTACCTACGTGTCTCGTCCTCCCTCTCTTTCCTCGGGCTAACGTTCTACCTTCTCCTCTCCTT
Silene conica	1	cp	CCTTGACCAATCTCTCAGCGGGAA	18-16	Silene_conica_mito_67	48502	A>G	TCCTACCTACGTGTCTCGTCCTCCCTCTCTTTCCTCGGGCTAACGTTCTACCTTCTCCTCTCCTTCTAGTCTCGTCCCACTTCGGCCGGCGGGTCGAACAAGCTACGCCCCACCCCCTCGGACTAACGTTCGACCTCTCTTCTCTCCCTTTGGTCGAGCTC
Silene conica	1	mt	GCGAACCCCTTTGGCCTGAGAGAA[R1]	11-9	Silene_conica_mito_67	48502	A>G	TGTTGTTACCAAGAGGGGAGCCCCCTTCTACTCTTATTAAGCAGTCGAGCCTATCTCTTTGTCAGTCGACCCTCTCTCTCCTACCTACGTGTCTCGTCCTCCCTCTCTTTCCTCGGGCTAACGTTCTACCTTC
Silene conica	1	mt	AAAAGTACGTATATTGTCTGGATC	17-11	Silene_conica_mito_67	48502	A>G	TTTTCTCCTCCACTTCGTATCTCAGGCCCTTAATGGGACTCGAGTGTTGTTACCAAGAGGGGAGCCCCCTTCTACTCTTATTAAGCAGTCGAGCCTATCTCTTTGTCAGTCGACCCTCTCTCTCCTACCTACGTGTCTCGTCCTCCCTCTCTTTCCTCGGGCTAACGTTCTACCTTCTCCTCTCCTTCTAG
Silene conica	1	mt	ATATTAAAACATCGCCACGACTGA	15-10	Silene_conica_mito_67	48502	A>G	GACCTCGTTGCACTCTCCTTGGCAGTCGAGCCTTTTCTCCTCCACTTCGTATCTCAGGCCCTTAATGGGACTCGAGTGTTGTTACCAAGAGGGGAGCCCCCTTCTACTCTTATTAAGCAGTCGAGCCTATCTCTTTGTCAGTCGACCCTCTCTCTCCTACCTACGTGTCTCGTCCTCCCTCTCTTTCCTCGGGCTAACGTTCTACCTTCTCCTCTC
Silene conica	1	mt	CCGAAGAATGTATAAGCTATGAGC[R1]	18-6	Silene_conica_mito_67	48502	A>G	CAAGAGGGGAGCCCCCTTCTACTCTTATTAAGCAGTCGAGCCTATCTCTTTGTCAGTCGACCCTCTCTCTCCTACCTACGTGTCTCGTCCTCCCTCTCTTTCCTCGGGCTAACGTTCTACCTTCTCCTCTCCT
Silene conica	2	cp	ATTTGTATGTGATCAAACCAAAAC[R1]	16-12	Silene_conica_mito_67	48502	A>G	CCCCCTTCTACTCTTATTAAGCAGTCGAGCCTATCTCTTTGTCAGTCGACCCTCTCTCTCCTACCTACGTGTCTCGTCCTCCCTCTCTTTCCTCGGGCTAACGTTCTACCTTCTCCTCTCCTTCTAGTCTCGT
Silene conica	2	cp	CGGACCACACAAGGAGGACGTATT[R1]	19-9	Silene_conica_mito_67	48502	A>G	GACCCTCTCTCTCCTACCTACGTGTCTCGTCCTCCCTCTCTTTCCTCGGGCTAACGTTCTACCTTCTCCTCTCCTTCTAGTCTCGTCCCACTTCGGCCGGCGGGTCGAACAAGCTACGCCCCACCCCCTCGGA
Silene conica	3	cp	GCATCCCCGAAATCTTACCTCACT	25-7	Silene_conica_mito_67	48502	A>G	AGCCCCCTTCTACTCTTATTAAGCAGTCGAGCCTATCTCTTTGTCAGTCGACCCTCTCTCTCCTACCTACGTGTCTCGTCCTCCCTCTCTTTCCTCGGGCTAACGTTCTACCTTCTCCTCTCCTTCTAGTCT
Silene conica	1	mt	CCCCGGAGAGATGACACCTCCATA[R1]	21-17	Silene_conica_mito_68	55805	A>G	AGGTGAGACCAAGGGTCAGCCCCATCTGAAGTCAGGCAAGAGTACCAACAGAAGTCTAATCTGAAGTGCAAAGATCAGTTCAAGTAAGTCGAAAAGCGTAAAGGGATATACGTATATAAGAGAGTTTTCTCAT
Silene conica	1	mt	ACAGAACAAAACTACCGAGCGGAA[R2]	13-11	Silene_conica_mito_68	55805	A>G	GAAGTGAGGTGAGACCAAGGGTCAGCCCCATCTGAAGTCAGGCAAGAGTACCAACAGAAGTCTAATCTGAAGTGCAAAGATCAGTTCAAGTAAGTCGAAAAGCGTAAAGGGATATACGTATATAAGAGAGTTT
Silene conica	1	mt	TATCACCGAGTTTTAATCTTAAAG[R1]	19-11	Silene_conica_mito_68	55805	A>G	AAGTTGCATCTTCAGCCAAAGATAAGTTCTGCGAAGTGAGGTGAGACCAAGGGTCAGCCCCATCTGAAGTCAGGCAAGAGTACCAACAGAAGTCTAATCTGAAGTGCAAAGATCAGTTCAAGTAAGTCGAAAA
Silene conica	1	mt	CGTTTCTTGGGGTAATATAGCGAC	15-14	Silene_conica_mito_68	55805	A>G	CTCTTGTACATTAATTTGGCAAAGGAGGTTGAAAGAGAGTCTTCCCAAGACAAGTTGCATCTTCAGCCAAAGATAAGTTCTGCGAAGTGAGGTGAGACCAAGGGTCAGCCCCATCTGAAGTCAGGCAAGAGTACCAACAGAAGTCTAATCTGAAGTG
Silene conica	2	cp	CCTCGCGAAACGCTAACAAAAAAC[R1]	14-11	Silene_conica_mito_68	55805	A>G	TTTCTTTCTGCCTTTCTTTCTCTTGTACATTAATTTGGCAAAGGAGGTTGAAAGAGAGTCTTCCCAAGACAAGTTGCATCTTCAGCCAAAGATAAGTTCTGCGAAGTGAGGTGAGACCAAGGGTCAGCCCCAT
Silene conica	3	mt	AAATTGTTTCACAATTTGAAACAT[R1]	19-13	Silene_conica_mito_68	55805	A>G	TTCTGCCTTTCTTTCTCTTGTACATTAATTTGGCAAAGGAGGTTGAAAGAGAGTCTTCCCAAGACAAGTTGCATCTTCAGCCAAAGATAAGTTCTGCGAAGTGAGGTGAGACCAAGGGTCAGCCCCATCT
Silene conica	3	mt	CTATGGCCGCCCTCTCAATATTAG	16-12	Silene_conica_mito_68	55805	A>G	TTCTTTCTCTTGTACATTAATTTGGCAAAGGAGGTTGAAAGAGAGTCTTCCCAAGACAAGTTGCATCTTCAGCCAAAGATAAGTTCTGCGAAGTGAGGTGAGACCAAGGGTCAGCCCCATCTG
Silene conica	3	mt	CCTCCCAATCAGTATTAACATTAT	19-17	Silene_conica_mito_68	55805	A>G	TCTCTTGTACATTAATTTGGCAAAGGAGGTTGAAAGAGAGTCTTCCCAAGACAAGTTGCATCTTCAGCCAAAGATAAGTTCTGCGAAGTGAGGTGAGACCAAGGGTCAGCCCCATCTGAAGTCAGGCAAGAGTACCAACAGAAGTCTAATCTGAAGTGCAAAGATCAGTTCAAGTAAGTCGAAAAGCGTAAAGGGATATA
Silene conica	3	mt	TAACTTAAGAAATGCAGATGACCT[R1]	16-9	Silene_conica_mito_68	55805	A>G	TTGCATCTTCAGCCAAAGATAAGTTCTGCGAAGTGAGGTGAGACCAAGGGTCAGCCCCATCTGAAGTCAGGCAAGAGTACCAACAGAAGTCTAATCTGAAGTGCAAAGATCAGTTCAAGTAAGTCGAAAAGCG
Silene conica	1	mt	CTAATCGATCATTACCAAACGCGA[R1]	16-9	Silene_conica_mito_68	60764	C>T	GCAAAAAGATCACCCACAAGCCTGCCAAGGAGAGTTTACGAGGATCGACTGCAAAGGACCCAGAGGGGTATCAACTGAAGTATGAAGGCGAGGAGATAACCCCGGGCGAACGACTGCAAAGGAGGTAGAGTAG
Silene conica	3	mt	CCCAACGGAAGATTCCACGGATAA[R1]	23-18	Silene_conica_mito_69	21159	A>C	TTTCGACTTGCTTTCACTTCATCTTTCACTTCTCGAGGCAAAGAAAAACTGCTCTCATTCTCTTAACTTTTCTTGGATTGGAGTCAGAATTTCAGGCAAAAAGCTAGTCCCAGGGGCAAGGCAAGCAAGGGGT
Silene conica	2	cp	ACCTCATCCCCAGTTTCTGCGCAG[R2]	11-6	Silene_conica_mito_7	27494	A>G	TTTTTTTCATAACGACCTAACCAAAGAAAAGGAAAAAGTCTGACTTTCTATCTTTCCTAGTGAGCTGTGCTCGAGCCAATTTAATTTCCTCAGCCATCTCCCAGCCGCGAATCCCCCCCTCTCGTCTTCATAC
Silene conica	2	cp	CAACCCATCCATCGGGGCGGGTAC[R2]	16-7	Silene_conica_mito_7	27494	A>G	CATCTCCCAGCCGCGAATCCCCCCCTCTCGTCTTCATACTTCCGTATGTCTACGCCTCTTTTTTTACCAACCCTTCGTTAGTTACTCAGCCAATCCCGCCGGGAGGCTTATCTCCTTTTCAGTCTATCCCACT
Silene conica	2	cp	AACATAACATTATTGTAACACCAG	16-13	Silene_conica_mito_7	27494	A>G	ATCTCCCAGCCGCGAATCCCCCCCTCTCGTCTTCATACTTCCGTATGTCTACGCCTCTTTTTTTACCAACCCTTCGTTAGTTACTCAGCCAATCCCGCCGGGAGGCTTATCTCCTTTTCAGTCTATCCCACTTCATGCTTTCTATCTTCTTCTTGTTTATATGTATGCGGGTCATTTCATCCCTT
Silene conica	3	cp	AACACTAACCGCTCAATACTGCAC[R2]	11-5	Silene_conica_mito_7	27494	A>G	CAATTTAATTTCCTCAGCCATCTCCCAGCCGCGAATCCCCCCCTCTCGTCTTCATACTTCCGTATGTCTACGCCTCTTTTTTTACCAACCCTTCGTTAGTTACTCAGCCAATCCCGCCGGGAGGCTTATCTCC
Silene conica	3	cp	CCTGTCATAGCCCTAACAAGGATG	16-14	Silene_conica_mito_7	30733	A>G	AAGATATCTAACCTCATTCCCTAGATCTAAAAAATTCTTATTCAACGCTTTTTGTTAAACACGTAAACTCCGAGATTGAATCCACCAAGCAGAGTCTAGCAATCGCTCATAGGAAGTTTATCCCCATCGGCTTTGCTTTAGCAGAGGGGTTACTGGAACTTTCCCCAAGACTCATTCTATTTTTAATTTGTGAAAGGGCGCGCT
Silene conica	1	mt	TAGAAACCTCGATCTGCCGTGAAT	13-9	Silene_conica_mito_7	36521	A>G	TTCTCGTTCCACATATAAAGTGTCCTATCCTAGAAAGCCCCGTTTAGATGTCTTCGGGGGGTTGAACAAGGTACCTATTCTCATGTCGCTTCTTAAGGAGTAGTTTGAAAGTAAAAGCCTCGGGCT
Silene conica	1	cp	AAAATATCAGACGAAACCAACTCA[R1]	24-20	Silene_conica_mito_7	104727	A>G	AATGTCTTAGCTCTTGATGGGCGTCCTTCTGGGCTCTCTCCCCCTTTAGTATGAGATCTACTTTAACTTTGTGAAATGGTCAAACCGAATTAAACAAACAACGAGTCAACCAAAAACCAAATTTCTAAGAATG
Silene conica	2	cp	CCCTAGCCCCCTTGAAGCTGAGCT	12-10	Silene_conica_mito_7	134661	A>C	CATCTGTGAATTGGCCTCAGTTCGAAGAGGCTTTTTTCAAGGAGTTCTCAGAAGTAGGCTAGGTAGAGTGCTCCTTCTTGTGCTTTCTGTGCTGCTTGTTCGGCTTAGGAGAGGGATGCTTTAGCTTCTTCTTTTCTTGCTTCTTAAGAAAAGTTCTTTAGTTCGT
Silene conica	2	cp	CCAAACCCGGACCCGGTGTTCCGG[R1]	20-11	Silene_conica_mito_70	35849	A>G	TTCGAGAAGGAGGTGCGAGAAGAAAAAGAAGAGCCGATGATTCCGAGTCTTGATCAGCTACTGCTATACCCCCAGGCGGACTAAGCAAGTAAATTCCGCGTATCTTAATGTAGCGAGATTGCTTGAAAAAGGG
Silene conica	2	cp	AATATATCCTCATTTTATCTTTAT[R2]	15-10	Silene_conica_mito_70	38797	A>G	AGACCCAGCCGTAAGATCACTTATAGTAGTAGGACTCGAGTTTAATAATTAAGAAAGTAGAGATGGGTAGTTATACGACCCAGCTTCCCCTTAGAATTTGGAGCTTGGAGACAACCCTTTTCATACGATAACC
Silene conica	1	cp	AAAAAAATGTAAACAAGGAAATGG[R2]	16-14	Silene_conica_mito_70	72472	C>T	TAAGCTCCTGCCGCCCTTTCAACCGTTACCACTTCGTGTCCTCTCCTTTTAGTCGAGCCTTCTCCTCCCACTCATCATCTCTCAGGACTTTAAAGTGCTCGAGTCATGTCATGCCGTCTTACGTTCGACCTCT
Silene conica	3	cp	AACATCGGATAAACCAATTGCAAC[R1]	9-8	Silene_conica_mito_71	73461	A>G	TATGAGAGGTTGCATAAACAGAGTTCCCTTTGGTCAAGGCATTCCCTCCATTCTTACTTTTCTTTTTGAAGTGTTACTCGGGTTTTTCTCTTGCTGGAATTCCACTCAGCCTTACTATCTTCTCGCTCGCGCG
Silene conica	2	cp	AGAACTGAAGAGCCTTAATCGAAA[R2]	23-17	Silene_conica_mito_71	76053	A>G	ACCCATTTTACGTAATCCAAAGGTGAGTTCAAGGAACTGGAAAGGTGAGGCAGGTTAGAGGTCTAGCACGCCCTTGAATTGACGAAAAATAACTTTTTCCATATATGTATATAAGAATGGGGATGGATTTGTT
Silene conica	3	cp	CCTCCGATTCCCCCTGAGAAACAC	11-3	Silene_conica_mito_71	76053	A>G	TCCTCTATTTGTCTTCATTTATTTCCCGATTCTCTCGTATATTAGGGCCTAGTTTATTAGTTTAGATTCTCTAACACCCATTTTACGTAATCCAAAGGTGAGTTCAAGGAACTGGAAAGGTGAGGCAGGTTAGAGGTCTAGCACGCCCTTGAATT
Silene conica	3	mt	CCTAAATAACGCTCATGAGGGTTC[R1]	18-13	Silene_conica_mito_71	76053	A>G	AGTCTCTTTTCAATTTCCTCTATTTGTCTTCATTTATTTCCCGATTCTCTCGTATATTAGGGCCTAGTTTATTAGTTTAGATTCTCTAACACCCATTTTACGTAATCCAAAGGTGAGTTCAAGGAACTGGAAA
Silene conica	2	cp	CGAAAGAACACAGGTCTAAGGCGG[R2]	6-4	Silene_conica_mito_72	5646	A>T	CCGCCTCAACTTCTAGCCTCTATCCCGACCCCCTCCCCTTGGCAGTCGAGCTCGTCACCTCGCCTCGCCCTCATACTTCAGCCTTCACCCCGACCCTTCTAGTCTCCTCGCTGCGCTCTCCTCTCGCTAGGCT
Silene conica	1	mt	AGATCTGGAAACCCCATATAAAGC[R1]	13-6	Silene_conica_mito_72	34942	A>G	GGTTTACAGAGTTCCGGAAATGTCAACTTTCGTTTTTCGTAGAATATAGAAGCAAGCTTTATTCGACCAGATCATAGGGGTCACCCCGAGCATTTCAAAGTTCCGGTCTTGGAATCCATCTATACATTATATA
Silene conica	1	cp	CAAAATGATATACCTTCTCGCTAA[R1]	24-23	Silene_conica_mito_72	35433	A>G	TTCGTTACGTTCGTTAAGATAACTGCCGTCGGTGGTAAGCTGACTAATGGGGGGGATTCTCATCAGATCACAAAAAAGCTTCGCGTCTTTCCTCTTTAATCGAGTACGCACTACATTTATTCTCCTCTCTATT
Silene conica	1	mt	AACGCCCATAACCCTCAACCAAAT	17-7	Silene_conica_mito_72	35433	A>G	GTTCGTTAAGATAACTGCCGTCGGTGGTAAGCTGACTAATGGGGGGGATTCTCATCAGATCACAAAAAAGCTTCGCGTCTTTCCTCTTTAATCGAGTAC
Silene conica	1	mt	TTACAGCAAAACTTTCCGTGCCGC[R2]	24-18	Silene_conica_mito_72	35433	A>G	CCGTTGGAACTTCGAAGGTGAAACCCAATGCGAGGCTTCGTTACGTTCGTTAAGATAACTGCCGTCGGTGGTAAGCTGACTAATGGGGGGGATTCTCATCAGATCACAAAAAAGCTTCGCGTCTTTCCTCTTT
Silene conica	2	cp	ACTTTCAATGTTTGATGCCAAGAA	20-13	Silene_conica_mito_72	35433	A>G	CTAAAGAGAAAGACTCCGTTGGAACTTCGAAGGTGAAACCCAATGCGAGGCTTCGTTACGTTCGTTAAGATAACTGCCGTCGGTGGTAAGCTGACTAATGGGGGGGATTCTCATCAGATCACAAAAAA
Silene conica	2	cp	CAAGAAGATCCACCCCATGCTGCC[R2]	21-12	Silene_conica_mito_72	35433	A>G	TCGGTGGTAAGCTGACTAATGGGGGGGATTCTCATCAGATCACAAAAAAGCTTCGCGTCTTTCCTCTTTAATCGAGTACGCACTACATTTATTCTCCTCTCTATTAAAATAGGAGCTTGGTCCAGCTGACTAC
Silene conica	2	cp	AACCCTCATCGAAGGATCCAAACC	13-9	Silene_conica_mito_72	35433	A>G	CGTTGGAACTTCGAAGGTGAAACCCAATGCGAGGCTTCGTTACGTTCGTTAAGATAACTGCCGTCGGTGGTAAGCTGACTAATGGGGGGGATTCTCATCAGATCACAAAAAAGCTTCGCGTCTTTCCTCTTTAA
Silene conica	3	mt	ACCTTAGGAGGATTGAGGTTTTAG[R1]	22-6	Silene_conica_mito_72	35433	A>G	AGAAAGACTCCGTTGGAACTTCGAAGGTGAAACCCAATGCGAGGCTTCGTTACGTTCGTTAAGATAACTGCCGTCGGTGGTAAGCTGACTAATGGGGGGGATTCTCATCAGATCACAAAAAAGCTTCGCGTCT
Silene conica	3	mt	GAGACTGAACCATGGCCAGTTTAT[R1]	29-18	Silene_conica_mito_72	35433	A>G	AGACTCCGTTGGAACTTCGAAGGTGAAACCCAATGCGAGGCTTCGTTACGTTCGTTAAGATAACTGCCGTCGGTGGTAAGCTGACTAATGGGGGGGATTCTCATCAGATCACAAAAAAGCTTCGCGTCTTTCC
Silene conica	1	cp	AAATCACACTTCCCTCGGCCGACT	25-19	Silene_conica_mito_72	58057	A>G	TAGACAGAAAGCCTTGGCCGATCTATCCTCCTGGTCTCAAAGACAGGGGAGTTATACTCATCCACCAAACCTCAACTGCCTTAGCCAGGTGCGCATGCATACTAAGGAGCGGGGATAAGCTCGATTGAAGAGAGATGAGAGGTATGAATGAAATGCTACTGAAGTATGAAGGCGGCGAGAGTA
Silene conica	1	cp	CTCTTCCTCCCCGCCATAATATTA[R1]	20-20	Silene_conica_mito_72	58057	A>G	GCCTTGGCCGATCTATCCTCCTGGTCTCAAAGACAGGGGAGTTATACTCATCCACCAAACCTCAACTGCCTTAGCCAGGTGCGCATGCATACTAAGGAGCGGGGATAAGCTCGATTGAAGAGAGATGAGAGGT
Silene conica	1	mt	CAATCCTCTGCGTAGACGTCGCGA	27-11	Silene_conica_mito_72	58057	A>G	TTAGCCAGGTGCGCATGCATACTAAGGAGCGGGGATAAGCTCGATTGAAGAGAGATGAGAGGTATGAATGAAATGCTACTGAAGTATGAAGGCGGCGAGAGTAGAGAGACTCTTTTGCAAAGAGAGGAAAAAGAAAAGACGTATGCCCGGACAAGGAGCATTTCTTTATACTGATGGCACTCACTACCAAAAGATACAAGAGA
Silene conica	1	mt	ATATAAAGTAACCAAGACACGATG[R2]	19-10	Silene_conica_mito_72	58057	A>G	GTCTCAAAGACAGGGGAGTTATACTCATCCACCAAACCTCAACTGCCTTAGCCAGGTGCGCATGCATACTAAGGAGCGGGGATAAGCTCGATTGAAGAGAGATGAGAGGTATGAATGAAATGCTACTGAAGTA
Silene conica	2	cp	AATTATTAAAACGATAGATTTTGT[R2]	11-7	Silene_conica_mito_72	58057	A>G	CCTTGGCCGATCTATCCTCCTGGTCTCAAAGACAGGGGAGTTATACTCATCCACCAAACCTCAACTGCCTTAGCCAGGTGCGCATGCATACTAAGGAGCGGGGATAAGCTCGATTGAAGAGAGATGAGAGGTA
Silene conica	2	cp	GGCGTGATGATCGTCTTAGGACAC[R2]	14-9	Silene_conica_mito_72	58057	A>G	ATCCTCCTGGTCTCAAAGACAGGGGAGTTATACTCATCCACCAAACCTCAACTGCCTTAGCCAGGTGCGCATGCATACTAAGGAGCGGGGATAAGCTCGATTGAAGAGAGATGAGAGGTATGAATG
Silene conica	3	mt	ACTTAGACCTCTTAGCTGATGAGG	24-15	Silene_conica_mito_72	58057	A>G	AAAGACAGGGGAGTTATACTCATCCACCAAACCTCAACTGCCTTAGCCAGGTGCGCATGCATACTAAGGAGCGGGGATAAGCTCGATTGAAGAGAGATGAGAGGTATGAATGAAATGCTACTGAAGTATGAAGGCGGCGAGAGTAGAGAGACTCTTTTGCAAAGAGAGGAAAAAGAAAAGACGTATGCCCGGACAAGGAGCATTT
Silene conica	2	cp	ATAAAGCAAACACCACGGCAATGG[R2]	17-11	Silene_conica_mito_72	60717	A>G	GACTCGAGCCCAAACGAACGGGAGGAGCAAGGCTCTACTAAAGGGGGAGGATGCGGAGTGGGACCTACCGTTCAAGTAAATAAATACGAAGTAGGCTCTGTTGTTAGTGAGAGGAAAGAAGAAATCCCGAACA
Silene conica	1	mt	AAGAGGCACAGGGTGACACGCGCG	17-14	Silene_conica_mito_73	12042	A>G	AAGTCATCGCGGCTTTTTCTCATCATGCAGCACATTCGAGAATCCACTTATGAATGAAAGAGGCTTCATACTCTGTCTTGGGCATACGTGCTATAATTCTATGATGCCAGGCCGTTTCCACCAATTAACGGGAGTCTCCCCAAAAGAGGGAGAGAGGAGCCTTATGCATATTCAAAGGCCC
Silene conica	3	cp	ATACCCGAATTCCGCTGTAAGGCA	10-9	Silene_conica_mito_73	12042	A>G	AAAGAACCAGTTCCTAGAATAAAATCTAAGTCATCGCGGCTTTTTCTCATCATGCAGCACATTCGAGAATCCACTTATGAATGAAAGAGGCTTCATACTCTGTCTTGGGCATACGTGCTATAATTCTATGATGCCAGGCCGTTTCCACCAATTAACGGGAGTCTCCCCAAAAGAGGG
Silene conica	3	mt	CAATTAGGAATAGCCTGGCCATTC	17-15	Silene_conica_mito_73	12042	A>G	GAACCAGTTCCTAGAATAAAATCTAAGTCATCGCGGCTTTTTCTCATCATGCAGCACATTCGAGAATCCACTTATGAATGAAAGAGGCTTCATACTCTGTCTTGGGCATACGTGCTATAATTCTATGATGCCAGGCCGTTTCCACCAATTAACGGGAGTCTCCCCAAAAGAGGGAGAGAGGAGCCTTATGCATATTCAAAGGCCCGCTTGTGGATGGG
Silene conica	3	mt	CGGCGAATTAATGGTTAAGAATAG[R2]	23-11	Silene_conica_mito_73	12042	A>G	CACCAATTAACGGGAGTCTCCCCAAAAGAGGGAGAGAGGAGCCTTATGCATATTCAAAGGCCCGCTTGTGGATGGGAATTACTTGCCCTGAGATCAGATCATATAATATAATGGGTCGCAGAATGAATCCTTT
Silene conica	3	mt	AGACAAGGGTGAGCCCGACATTAT	22-16	Silene_conica_mito_73	18442	C>A	AAGAGCGCGCGCGATACTAACTGCTAGAAGTTTGGGGCTGACTTATAGAAGAGAAATCAAGTGGCGGTTGGAAGATAGATGTGTCGTTGAAAAAGATCTTGCCCCTTTTAGCACCTGTGCTTGCATACTAGCCAGGGTCTTCCTTTTCTGAATTTAGTAGCTTCGTAATTTAATGAAGAAAAAGCCTCACAGCCTCTGCTCTAA
Silene conica	1	mt	ACCGGCGCACGCGAGCTGCTGAGT[R2]	20-10	Silene_conica_mito_73	31202	A>G	ATTGAGAATTTGTATGAGAGAGAGGTCGGCACATCACAAGGCATCCCCTTACCTATTAGGAGCTATAAATACAAGGAAGATAAGGCTCCCGATCTTACCTTTTTCTAATTCAATTTTGCTAGAAGGGGGAGGC
Silene conica	3	cp	ATCAAGCAAAAGCTAGTATTGAGG[R1]	9-7	Silene_conica_mito_73	31202	A>G	GCATATAGTAAGAGGGAGCTGCTCCAATCCTATAAGAAAGAAGACTTTTCTCGTATATTGAGAATTTGTATGAGAGAGAGGTCGGCACATCACAAGGCATCCCCTTACCTATTAGGAGCTATAAATACAAGGA
Silene conica	3	cp	GGGACGTAACCATCCAATTAAACG[R1]	21-4	Silene_conica_mito_73	31202	A>G	TTTTCTCGTATATTGAGAATTTGTATGAGAGAGAGGTCGGCACATCACAAGGCATCCCCTTACCTATTAGGAGCTATAAATACAAGGAAGATAAGGCTCCCGATCTTACCTTTTTCTAATTCAATTTTGCTAG
Silene conica	3	mt	AAACTTTGGGATCAAAATGTCCCT	22-19	Silene_conica_mito_73	31202	A>G	GGATTATGAATAGAATTGCAAGCATTAGAAAAAAAGAATGAACGAAGCATATAGTAAGAGGGAGCTGCTCCAATCCTATAAGAAAGAAGACTTTTCTCGTATATTGAGAATTTGTATGAGAGAGAGGTCGGCACATCACAAGGCATCCCCTTACCTATTAGGAGCTATAAATACAAGGAAGATAAGGCTCCCGA
Silene conica	3	mt	CTCACTGCGAGGTGGGCACCATTC[R1]	12-8	Silene_conica_mito_73	31202	A>G	CTTTTCTCGTATATTGAGAATTTGTATGAGAGAGAGGTCGGCACATCACAAGGCATCCCCTTACCTATTAGGAGCTATAAATACAAGGAAGATAAGGCTCCCGATCTTACCTTTTTCTAATTCAATTTTGCTA
Silene conica	1	cp	CATGGCGGATATGTTAACGATAGA[R2]	22-20	Silene_conica_mito_76	46516	C>G	TAGGGCTCGAGTGCCAGCGGGAGAGATTGGCGAGAGTGCATACGATAAAAGAGAGTAGAGAATCTTAACGAGAGGAGAAAGAGCGGAGTGGGATCGACTGGCAAGGTAGAGAAGGCCTCAGGAAAGATAAATA
Silene conica	1	cp	AGAGCCAGAACGTAGAGCCAATGC	19-9	Silene_conica_mito_76	56568	A>G	CTTTCTCTCCTTTTTGCTATACCTCGGCTTAGCTTAAAAGGAAATCTAAGAAAAGAAGGAGCCTCGCTACGTAATTAGCAGGATGAGTGGAAGACCCTGTGAGCAGACCCTTTCAGAAAAGCCTTCTTACTTTCTATATAGCCCTCTTCTTTTTTTCTTTTATTCATTCAATAAGGGGCAATGTAAGAG
Silene conica	1	mt	AAGGACAAAGAGCGCTACAACATA	14-11	Silene_conica_mito_76	56568	A>G	TAAAAGGAAATCTAAGAAAAGAAGGAGCCTCGCTACGTAATTAGCAGGATGAGTGGAAGACCCTGTGAGCAGACCCTTTCAGAAAAGCCTTCTTACTTTCTATATAGCCCTCTTCTTTTTTTCTTTTATTCATTCAATAAGGGGCAATGTAAGAGGAAAGCCAAGGCTTTATCGGAACTGGGAACTTGGAAAGAGTCTAAGAATAAAGTCTTGAA
Silene conica	1	mt	CCCCTCTAGTCATCTTCTTGTCAA	17-7	Silene_conica_mito_76	56568	A>G	TGGAAGACCCTGTGAGCAGACCCTTTCAGAAAAGCCTTCTTACTTTCTATATAGCCCTCTTCTTTTTTTCTTTTATTCATTCAATAAGGGGCAATGTAAGAGGAAAGCCAAGGCTTTATCGGAACTGGGAACTTGGAAAGAGTCT
Silene conica	1	mt	GAAAGAGGCTAGTGTCTCGTAATA[R2]	19-14	Silene_conica_mito_76	56568	A>G	AAGAAAAGAAGGAGCCTCGCTACGTAATTAGCAGGATGAGTGGAAGACCCTGTGAGCAGACCCTTTCAGAAAAGCCTTCTTACTTTCTATATAGCCCTCTTCTTTTTTTCTTTTATTCATTCAATAAGGGGCA
Silene conica	1	mt	GACATCTTGCAATCGAGGTTAAGA	19-17	Silene_conica_mito_76	56568	A>G	TACCTCGGCTTAGCTTAAAAGGAAATCTAAGAAAAGAAGGAGCCTCGCTACGTAATTAGCAGGATGAGTGGAAGACCCTGTGAGCAGACCCTTTCAGAAAAGCCTTCTTACTTTCTATATAGCCCTCTTCTTTTTTTCTTTTATTCATTCAATAAGGGGCAA
Silene conica	1	mt	AACCCTAAAACACAAGTTGAAGTA	20-10	Silene_conica_mito_76	56568	A>G	TACCTCGGCTTAGCTTAAAAGGAAATCTAAGAAAAGAAGGAGCCTCGCTACGTAATTAGCAGGATGAGTGGAAGACCCTGTGAGCAGACCCTTTCAGAAAAGCCTTCTTACTTTCTATATAGCCCTCTTCTTTTTTTCTTTTATTCATTCAATAAGGGGCAATGTAAGAGGAAAGCCAAGGCTTTATCGGAACTGGGAACTTGGAAAGAGTCTAAGAA
Silene conica	2	cp	GCTTGCAACGTGGTAAGCAAGGAA[R1]	8-5	Silene_conica_mito_76	56568	A>G	TCAGAAAAGCCTTCTTACTTTCTATATAGCCCTCTTCTTTTTTTCTTTTATTCATTCAATAAGGGGCAATGTAAGAGGAAAGCCAAGGCTTTATCGGAACTGGGAACTTGGAAAGAGTCTAAGAATAAAGTCT
Silene conica	2	cp	GTATTCACTCGATGACCCTCACTA[R1]	8-5	Silene_conica_mito_76	56568	A>G	AAGAAGGAGCCTCGCTACGTAATTAGCAGGATGAGTGGAAGACCCTGTGAGCAGACCCTTTCAGAAAAGCCTTCTTACTTTCTATATAGCCCTCTTCTTTTTTTCTTTTATTCATTCAATAAGGGGCAATGTA
Silene conica	3	cp	CTACCTGTACCATTAATAGCTGAA[R2]	11-6	Silene_conica_mito_76	56568	A>G	AGACCCTTTCAGAAAAGCCTTCTTACTTTCTATATAGCCCTCTTCTTTTTTTCTTTTATTCATTCAATAAGGGGCAATGTAAGAGGAAAGCCAAGGCTTTATCGGAACTGGGAACTTGGAAAGAGTCTAAGAA
Silene conica	3	cp	CTATGCCTCCGATCGATTTCGCAG	12-10	Silene_conica_mito_76	56568	A>G	CCTTCTTACTTTCTATATAGCCCTCTTCTTTTTTTCTTTTATTCATTCAATAAGGGGCAATGTAAGAGGAAAGCCAAGGCTTTATCGGAACTGGGAACTTGGAAAGAGTCTAAGAATAAAGTCTTGAACCCTAGGGAATGACGTCCTGTGACTTCA
Silene conica	3	cp	GAGGACAGATTAGCTTACCTCCGC[R2]	15-13	Silene_conica_mito_76	56568	A>G	AAGAAGGAGCCTCGCTACGTAATTAGCAGGATGAGTGGAAGACCCTGTGAGCAGACCCTTTCAGAAAAGCCTTCTTACTTTCTATATAGCCCTCTTCTTTTTTTCTTTTATTCATTCAATAAGGGGCAATGTA
Silene conica	3	mt	CCAAGCGCAGTTCTCCGAGACGCT[R2]	17-14	Silene_conica_mito_76	56568	A>G	TAGCTTAAAAGGAAATCTAAGAAAAGAAGGAGCCTCGCTACGTAATTAGCAGGATGAGTGGAAGACCCTGTGAGCAGACCCTTTCAGAAAAGCCTTCTTACTTTCTATATAGCCCTCTTCTTTTTTTCTTTTA
Silene conica	3	mt	GAATCGCTTATGGCGTAACCTACT[R2]	14-13	Silene_conica_mito_76	56568	A>G	TACCTCGGCTTAGCTTAAAAGGAAATCTAAGAAAAGAAGGAGCCTCGCTACGTAATTAGCAGGATGAGTGGAAGACCCTGTGAGCAGACCCTTTCAGAAAAGCCTTCTTACTTTCTATATAGCCCTCTTCTTT
Silene conica	3	cp	TACAAAATCCATTCGGAACAGCAA[R1]	18-10	Silene_conica_mito_76	67510	A>G	AAGAAAGGAAGCAGTCTTTCTCTGCCCAAAGCTATCCCACAGACACTGCTTTAAATCGAGCTTGGTTCGCCGCTGCGGATTTTCTCAGTTAAGTCAAGCCCCTTAAACCCCGAGGAGAACGAAAGCCAAAGAT
Silene conica	1	cp	CCCAGAACTTCCGTTAAGAAGAGC	24-20	Silene_conica_mito_77	58608	A>G	GGCGTATTGAACTCCTGTTTATATCTTCTCTTTGGTTTAGAAAGAAAGAGGGAAGTACTGCACCTTCTTCGGGCCGTAAGGCTCCGCCCTTACTTAATCCAAGCTCAATCTCATCGAAGCTGCTCTAATGGCTGGCTCACACATCC
Silene conica	1	cp	GACAACGATATATCTATACCCCCC[R2]	32-18	Silene_conica_mito_77	58608	A>G	AGTACTGCACCTTCTTCGGGCCGTAAGGCTCCGCCCTTACTTAATCCAAGCTCAATCTCATCGAAGCTGCTCTAATGGCTGGCTCACACATCCCCCTTTTGTATCGGGCGAGGCGTCCAATGTAATGAAAGGG
Silene conica	1	cp	GATACGATTGTAGCCCGACACCAG	23-13	Silene_conica_mito_77	58608	A>G	AGAGAGATTTCTTTAAACTTATTAACTTACGAGATAAACTCTTTAGATCTAATTCTCCTTTAGAAAAGAGTAAGGGGCGGCGTATTGAACTCCTGTTTATATCTTCTCTTTGGTTTAGAAAGAAAGAGGGAAGTACTGCACCTTCTTCGGGCCGTAAGGCTCCGCCCTTACTTAATCCAAGCTCAATCTCATCGAAGCTGCTCTAATGGCTGGCTCACA
Silene conica	1	mt	ATGGATACGAGGCACGAAAATACT	24-11	Silene_conica_mito_77	58608	A>G	AGGAAAAAGTCTTCCTTGGATTAAGAGAGATTTCTTTAAACTTATTAACTTACGAGATAAACTCTTTAGATCTAATTCTCCTTTAGAAAAGAGTAAGGGGCGGCGTATTGAACTCCTGTTTATATCTTCTCTTTGGTTTAGAAAGAAAGAGGGAAGTACTGCACCTTCTTCGGGCCGTAAGGCTCCGCCCTTACTTAATCCAAGCTCAATCTCATC
Silene conica	1	mt	CGGTTTTTACAAGAACACCAACAA[R1]	12-5	Silene_conica_mito_77	58608	A>G	TAGAAAAGAGTAAGGGGCGGCGTATTGAACTCCTGTTTATATCTTCTCTTTGGTTTAGAAAGAAAGAGGGAAGTACTGCACCTTCTTCGGGCCGTAAGGCTCCGCCCTTACTTAATCCAAGCTCAATCTCATC
Silene conica	1	mt	CTCGTGGAAGTTTTACAAAGACAC[R1]	21-17	Silene_conica_mito_77	58608	A>G	CTCCTTTAGAAAAGAGTAAGGGGCGGCGTATTGAACTCCTGTTTATATCTTCTCTTTGGTTTAGAAAGAAAGAGGGAAGTACTGCACCTTCTTCGGGCCGTAAGGCTCCGCCCTTACTTAATCCAAGCTCAAT
Silene conica	2	cp	AGCCCAAACATAGATGTGTCGGAG[R2]	11-10	Silene_conica_mito_77	58608	A>G	AGTAAGGGGCGGCGTATTGAACTCCTGTTTATATCTTCTCTTTGGTTTAGAAAGAAAGAGGGAAGTACTGCACCTTCTTCGGGCCGTAAGGCTCCGCCCTTACTTAATCCAAGCTCAATCTCATCGAAGCTGC
Silene conica	2	cp	TAGCCAACTAATTATTTCCGCAGA	15-15	Silene_conica_mito_77	58608	A>G	AGAAAGAAAGAGGGAAGTACTGCACCTTCTTCGGGCCGTAAGGCTCCGCCCTTACTTAATCCAAGCTCAATCTCATCGAAGCTGCTCTAATGGCTGGCTCACACATCCCCCTTTTGTATCGGGCGAGGCGTCCAATGTAATG
Silene conica	2	cp	AATGGTAAAAAAACCACCGATATA	15-5	Silene_conica_mito_77	58608	A>G	AAGAAAGAGGGAAGTACTGCACCTTCTTCGGGCCGTAAGGCTCCGCCCTTACTTAATCCAAGCTCAATCTCATCGAAGCTGCTCTAATGGCTGGCTCACACATCCCCCTTTTGTATCGGGCGAGGCGTCCAATGTAATGAAAGGGAAAGACGCATCCACATCAGCCCTATGAA
Silene conica	2	cp	CAAAGCGAGCCACGGGACCCGCCC	24-14	Silene_conica_mito_77	58608	A>G	TTCTCTTTGGTTTAGAAAGAAAGAGGGAAGTACTGCACCTTCTTCGGGCCGTAAGGCTCCGCCCTTACTTAATCCAAGCTCAATCTCATCGAAGCTGCTCTAATGGCTGGCTCACACATCCCCCTTTTGTATCGGGCGAGGCGTCCAATGTAATGAAAGGGA
Silene conica	2	cp	CACCCCACAAAAGAGATAGACCTG	18-5	Silene_conica_mito_77	58608	A>G	GGTTTAGAAAGAAAGAGGGAAGTACTGCACCTTCTTCGGGCCGTAAGGCTCCGCCCTTACTTAATCCAAGCTCAATCTCATCGAAGCTGCTCTAATGGCTGGCTCACACATCCCCCTTTTGTATCGGGCGAGGCGTCCAATGTAATGAAAGGGAAAGACGCATCCACATCAGCCCTATGAAACTTCG
Silene conica	3	cp	AATGCAATATGATGAGTGGCGGGT[R1]	13-11	Silene_conica_mito_77	58608	A>G	TATATCTTCTCTTTGGTTTAGAAAGAAAGAGGGAAGTACTGCACCTTCTTCGGGCCGTAAGGCTCCGCCCTTACTTAATCCAAGCTCAATCTCATCGAAGCTGCTCTAATGGCTGGCTCACACATCCCCCTTT
Silene conica	3	cp	CTGGGACAAGGCGTATGCCGGATT[R2]	22-14	Silene_conica_mito_77	58608	A>G	CTCCTGTTTATATCTTCTCTTTGGTTTAGAAAGAAAGAGGGAAGTACTGCACCTTCTTCGGGCCGTAAGGCTCCGCCCTTACTTAATCCAAGCTCAATCTCATCGAAGCTGCTCTAATGGCTGGCTCACACAT
Silene conica	3	mt	AGATAATGAGAGTAGTGTGCGGTT[R1]	19-5	Silene_conica_mito_77	58608	A>G	GGGGCGGCGTATTGAACTCCTGTTTATATCTTCTCTTTGGTTTAGAAAGAAAGAGGGAAGTACTGCACCTTCTTCGGGCCGTAAGGCTCCGCCCTTACTTAATCCAAGCTCAATCTCATCGAAGCTGCTCTAA
Silene conica	3	mt	CCCCCCACCCTCGAGTGGAATTGA	21-18	Silene_conica_mito_77	58608	A>G	TTCTTTAAACTTATTAACTTACGAGATAAACTCTTTAGATCTAATTCTCCTTTAGAAAAGAGTAAGGGGCGGCGTATTGAACTCCTGTTTATATCTTCTCTTTGGTTTAGAAAGAAAGAGGGAAGTACTGCACCTTCTTCGGGCCGTAAGGCTCCGCCCTTACTTAATCCAAGCTCAATCTCATCGAAGCTGCTCTAATGGCTGGCTCACACATCCCCCTTTTGTATCGGG
Silene conica	3	mt	CCAAATAACCGAGCCTAATGACCA	33-24	Silene_conica_mito_77	58608	A>G	ATTCTCCTTTAGAAAAGAGTAAGGGGCGGCGTATTGAACTCCTGTTTATATCTTCTCTTTGGTTTAGAAAGAAAGAGGGAAGTACTGCACCTTCTTCGGGCCGTAAGGCTCCGCCCTTACTTAATCCAAGCTCAATCTCATCGAAGCTGCTCTA
Silene conica	3	mt	CCAATTGACTCTCGCTCGGCTACC[R1]	12-10	Silene_conica_mito_77	58608	A>G	ACCTTCTTCGGGCCGTAAGGCTCCGCCCTTACTTAATCCAAGCTCAATCTCATCGAAGCTGCTCTAATGGCTGGCTCACACATCCCCCTTTTGTATCGGGCGAGGCGTCCAATGTAATGAAAGGGAAAGACGC
Silene conica	3	mt	AAACTTTACGCGCTTCCCTCAAAA[R1]	16-11	Silene_conica_mito_77	58608	A>G	CTTTAGATCTAATTCTCCTTTAGAAAAGAGTAAGGGGCGGCGTATTGAACTCCTGTTTATATCTTCTCTTTGGTTTAGAAAGAAAGAGGGAAGTACTGCACCTTCTTCGGGCCGTAAGGCTCCGCCCTTACTT
Silene conica	3	mt	ACATAAATTCCGTTCGGCCTCGGG[R2]	23-22	Silene_conica_mito_78	31136	A>G	ATTAACCGTGATGCGTGGTCCGTGATGCGAAGCCTTTTGTTTTATTGCTTGGTTAAGAGAATGTCCCCTACTTGTTCGTCTTGTGGTAGGTATCTCGTGGATTGGATCTTCGAGCGTCGTAGTTTTCTGTATG
Silene conica	2	cp	CACAGGCGCCCCTATAAAATCATA[R2]	14-10	Silene_conica_mito_78	67744	A>G	TAAATGTTCGCCGATAAGAGCAACAACGCGTTTACTCTTCTTACCATACTTCACTTCATTTCTATTAACTGATAATTCTTCCGGGCACTCCTCTCCTAAGCAGCTGAGCCTATCTCCTCTTAGTACTTGATCC
Silene conica	3	mt	CGTGACGCCATCGACCTTGATAAT	17-14	Silene_conica_mito_78	67744	A>G	AACAACATATCATAAGAAGCATTTAACAGCAGCAGGCAGCAATGCATATGCCTGTAATCTCACCTATGTACTCACCTCACTCCGTTAAATGTTCGCCGATAAGAGCAACAACGCGTTTACTCTTCTTACCATACTTCACTTCATTTCTATTAACTGATAATTCTTCCGGGCACTCCTCTCCTAAGCAGCTGAGCCTATCTCCTCTTAGTACTTGATCCTGT
Silene conica	3	cp	ATTTACGGCGATGAAGAAACACAT[R1]	7-5	Silene_conica_mito_79	34510	A>G	ATTCGGATTGATTAGTCTCACCTACAGACTCCTACCTTTCTTCGTATTGTTGAGATCTAGCTCTATTTAATAAAAAAGGCCTGGGAACCTCGCCTATTACTATACTATTAACCCCAGAGCTTCTCCTTATGTT
Silene conica	3	cp	CCCCATTGCGAGGAGACCAATCCA	14-12	Silene_conica_mito_79	34510	A>G	CCTTTCTTCGTATTGTTGAGATCTAGCTCTATTTAATAAAAAAGGCCTGGGAACCTCGCCTATTACTATACTATTAACCCCAGAGCTTCTCCTTATGTTAAGCTCTACCCAGAGTAAGCAACTAAGACTCTAAGTAGAATAAAGAAAGAACCAACCAGCCAAGGCTTTTGAAGGTCTGGCAAATGAAGAAGAACCTTCCTCTCT
Silene conica	1	cp	ACGTGTATATAGCCTCCGATCCGT	27-24	Silene_conica_mito_79	35643	A>G	TAGCAAAAAAGAGTTAAAGCAAGACATACCTAACCTAAAGAAACTCCCCAAAGTACAGCTCCAAGAGCGCCTTTTAGTTCAAGCCTATTAATGCTCAAGGTACTACTACTATATTCGCCCTAAGTGGATAGGAGCTTTTTCCTTGTCTTTTCCTTTTGTAGACATACACCA
Silene conica	1	cp	AGATAAATATGACAAAGTCGTAAT	23-13	Silene_conica_mito_79	35643	A>G	CTTATGATGATGACAGGGGCGCGAGTGTAGTTTCGTAGCGAGATAGCAAAAAAGAGTTAAAGCAAGACATACCTAACCTAAAGAAACTCCCCAAAGTACAGCTCCAAGAGCGCCTTTTAGTTCAAGCCTATTAATGCTCAAGGTACTACTACTATATTCGCCCTAAGTGGATAGG
Silene conica	1	cp	ACCCCCCTAACCTCGATTGGGAAA[R2]	24-15	Silene_conica_mito_79	35643	A>G	CTTTTCTAGTCTATAGCACCCACTTGGGCCATTTCTTATGATGATGACAGGGGCGCGAGTGTAGTTTCGTAGCGAGATAGCAAAAAAGAGTTAAAGCAAGACATACCTAACCTAAAGAAACTCCCCAAAGTAC
Silene conica	1	mt	CCATCGGCACCATAACAACATTCT[R2]	17-9	Silene_conica_mito_79	35643	A>G	CTAAAGAAACTCCCCAAAGTACAGCTCCAAGAGCGCCTTTTAGTTCAAGCCTATTAATGCTCAAGGTACTACTACTATATTCGCCCTAAGTGGATAGGAGCTTTTTCCTTGTCTTTTCCTTTTGTAGACATAC
Silene conica	1	cp	CAGGTTCCATAGCCATAACCCAAA[R1]	26-17	Silene_conica_mito_79	51680	A>G	AAACTTTACTTTAATCTTAGATTCTCGAAGAGAAAGAAAGCTCCGTCTCAACTCTCTCTCCTCACCTTGCCAACGAAGGGAGAGATTTCATTCAACAAGTCCCAACCCCCGAGGGCGCTTGCTAGTAGACTCA
Silene conica	1	mt	AACGCTACGACAATGACGGCATGT	14-12	Silene_conica_mito_79	51680	A>G	ATCTTTCTTACTTCGGAAACTTTACTTTAATCTTAGATTCTCGAAGAGAAAGAAAGCTCCGTCTCAACTCTCTCTCCTCACCTTGCCAACGAAGGGAGAGATTTCATTCAACAAGTCCCAACCCCCGAGGGCGCTTGCTAGTAGACTCAATCAGTAGTAAACTTTTTCGTATATCTTTTGTCTTCGACTACGAAATCCCTCTTAGACTCTTTTTTT
Silene conica	3	cp	CATGAGTGCCATTCAAAAAGGGTT	15-8	Silene_conica_mito_79	51680	A>G	CTTTACTTTAATCTTAGATTCTCGAAGAGAAAGAAAGCTCCGTCTCAACTCTCTCTCCTCACCTTGCCAACGAAGGGAGAGATTTCATTCAACAAGTCCCAACCCCCGAGGGCGCTTGCTAGTAGACTCAATCAGTAG
Silene conica	3	cp	GACGTTTGAAACTCCAATAGCTCT[R1]	6-5	Silene_conica_mito_79	51680	A>G	GAAAGCTCCGTCTCAACTCTCTCTCCTCACCTTGCCAACGAAGGGAGAGATTTCATTCAACAAGTCCCAACCCCCGAGGGCGCTTGCTAGTAGACTCAATCAGTAGTAAACTTTTTCGTATATCTTTTGTCTT
Silene conica	3	mt	CGGCGGCTGGGCTGCCACCGAGAT	20-18	Silene_conica_mito_8	26577	A>G	CTTCTCTAATAGTAGTCGTGTCTACTAAGGTTCTTTTTTACAGTCGAAGTTAAATCATCCTCTCCTTCTCAGTCGAGCCTACCGCCCATTTTTACTTCTTTTTCGGGTCTCTCGAGGGGGGTCAGATCTCTTTCTTGCCCTTTTTGAAAAGAGCAAGCGGCAAAATAAAAATTCTTTCTAGCCCGGGAAAATCGAAGACAACTTGTCCAAAAAAGG
Silene conica	3	cp	GAAAAGGTCCGATATTTACCCTTA	11-8	Silene_conica_mito_8	51211	A>G	AAAGCAGGCAGCTTTCCTGTATTCTGAGCCGAGCCTAAACCCTGTCCCTACGGAAAATCGAGAACTTTCAAGGGGTGATCAATTGTGCCATTTTGACTTTTGCATAATAAAGAAACAAAGAAAAGAAAAGATGACTGACGAAAAGCACTAATTCTCTCTGTCCTGCGCTATGCACTTTCCTTC
Silene conica	3	mt	ATTTCCGTGACGTCATAACCTCCT[R1]	27-26	Silene_conica_mito_8	62815	C>G	TTCACTGCGCTTTACTCAAGAAAGATCAGTCCACTCGTCAGTCCAAGATGAAGACATAGACAAGGACAATTGGAAGCAAAAGACAGGAAAAGGAGAAAGGCTCGAACGTTAGTGAGAGGAGGTGAAAACGCTC
Silene conica	3	mt	GTGCACATTCCCTGACTGGGCTAA[R1]	11-5	Silene_conica_mito_80	36092	C>A	GCTGCTTAACCACCGACAGCTTCTTTTTGATTGGCTGACTTTTCTAATAGCGTGCGGACTTGTCTGTAAACTTGTTCAGATGCTTCTCCACGAACATTTTGTTTAAGAGCTCATTGCAAAGAGGAAGTTGTTA
Silene conica	1	cp	CTTCCCAGCATTGTCATGAGATTG[R1]	25-20	Silene_conica_mito_80	40131	A>C	ACTTTTTGGGGCTTTGTGCTTACTCTTGCTGCCACAGATGCTGAATACCCTTCTCCAACCAAAAAGAGGCCAATCTTCTCGTAGGTTCAATCTCTCAAACACAGAGACAATTTATACTTCGGGCACAGGTTCG
Silene conica	1	mt	AACTATACGACCTAAAGTGAGACG	14-10	Silene_conica_mito_80	40131	A>C	ATTTAAGCTTCATTGGGGCAAAGGTGCGCATCGGCTAGATCACTTTCCGTGAGAGATTAGTCGCCCTAACCTGACGGGAGTTGGGACATTGTATCTACATGTAAGATGTAAGACAGAGGATGTCCAAGATGCTCTTTACTTTTTGGGGCTTTGTGCTTACTCTTGCTGCCACAGATGCTGAATACCCTTCTCCAACCAAAAAGAGGCCAATCTTCTCGTAGGTTCAATCTCTCAAAC
Silene conica	1	mt	ATTAGCGAGCGTCTAATACTGAAT[R2]	25-18	Silene_conica_mito_80	40131	A>C	CAAGATGCTCTTTACTTTTTGGGGCTTTGTGCTTACTCTTGCTGCCACAGATGCTGAATACCCTTCTCCAACCAAAAAGAGGCCAATCTTCTCGTAGGTTCAATCTCTCAAACACAGAGACAATTTATACTTC
Silene conica	1	mt	CTCGAGACCCACTACCGAAACCGA	21-9	Silene_conica_mito_80	40131	A>C	AGAGGATGTCCAAGATGCTCTTTACTTTTTGGGGCTTTGTGCTTACTCTTGCTGCCACAGATGCTGAATACCCTTCTCCAACCAAAAAGAGGCCAATCTTCTCGTAGGTTCAATCTCTCAAACACAGAGACAATTTA
Silene conica	2	cp	AATTCTAATTTCCGGTCAGAAACT[R1]	18-13	Silene_conica_mito_80	40131	A>C	CCTGACGGGAGTTGGGACATTGTATCTACATGTAAGATGTAAGACAGAGGATGTCCAAGATGCTCTTTACTTTTTGGGGCTTTGTGCTTACTCTTGCTGCCACAGATGCTGAATACCCTTCTCCAACCAAAAA
Silene conica	2	cp	TCATTTAGATCGTGAGATCATGAA[R1]	12-9	Silene_conica_mito_80	40131	A>C	TTTCCGTGAGAGATTAGTCGCCCTAACCTGACGGGAGTTGGGACATTGTATCTACATGTAAGATGTAAGACAGAGGATGTCCAAGATGCTCTTTACTTTTTGGGGCTTTGTGCTTACTCTTGCTGCCACAGAT
Silene conica	2	cp	TTCACGCAGCTCTTGAACACAAGT	15-3	Silene_conica_mito_80	40131	A>C	CACTTTCCGTGAGAGATTAGTCGCCCTAACCTGACGGGAGTTGGGACATTGTATCTACATGTAAGATGTAAGACAGAGGATGTCCAAGATGCTCTTTACTTTTTGGGGCTTTGTGCTTACTCTTGCTGCCACAGATGCTGAATACCCTTCTCC
Silene conica	3	cp	GATCAAGCAACGGCGTTCTGAGGA[R1]	12-7	Silene_conica_mito_80	40131	A>C	CTCTTTACTTTTTGGGGCTTTGTGCTTACTCTTGCTGCCACAGATGCTGAATACCCTTCTCCAACCAAAAAGAGGCCAATCTTCTCGTAGGTTCAATCTCTCAAACACAGAGACAATTTATACTTCGGGCACA
Silene conica	3	mt	CACACTTTCAGACGACGGCCTGAA	23-23	Silene_conica_mito_80	40131	A>C	TCACTTTCCGTGAGAGATTAGTCGCCCTAACCTGACGGGAGTTGGGACATTGTATCTACATGTAAGATGTAAGACAGAGGATGTCCAAGATGCTCTTTACTTTTTGGGGCTTTGTGCTTACTCTTGCTGCCACAGATGCTGAATACCCTTCTCCAACCAAAAAGAGGCCAATCTTCTC
Silene conica	3	mt	CCCATTAAAAACCCTGGAGCCCTT	39-12	Silene_conica_mito_80	40131	A>C	AAGATGTAAGACAGAGGATGTCCAAGATGCTCTTTACTTTTTGGGGCTTTGTGCTTACTCTTGCTGCCACAGATGCTGAATACCCTTCTCCAACCAAAAAGAGGCCAATCTTCTCGTAGGTTCAATCTCTCAAACACAGAGACAATT
Silene conica	2	cp	TCGCTATGCCTCTCGCTCCCCCGA	11-5	Silene_conica_mito_81	15822	C>G	TCTTACTAAGTATAAGTAGAGCAGACACAAAGAAAATAAAAGAGGGAAAACTCTGGCCTATGAACAAGCAGAAAGTCAGCTAAAGAAGAGCGACCAGGCCTTGACGACTTCTTAAACTACTACATTGATAATAGCTAGCACACCAACTTATATCTTAGCATAGAGCTTCA
Silene conica	3	cp	AATGCGCAAACAATAAATAATTAA	7-4	Silene_conica_mito_81	60786	A>G	AAAAAGGTGAAAGGGATATACGTATATAAGAATGAAGATCTTTTTCTTAATTTAAATAGGCTCGAAAGGTAGCGGAAAGTCCTTTTCTGTGTGAGGATAAGGGCTCGGCTAAAAGGAGAGGACCGAAGTATCTGAGTGACGCGGTGGTTTACCAGAGGAACGAAGTCGACCGGAAGGCGGATAAATGCCCTGAGGAGAGAGGATCGGCTAAG
Silene conica	1	cp	ACCCTTGCTACCACCTATACCGCG	17-15	Silene_conica_mito_82	12955	A>G	ATCTTCTCCTCCTTGACAATCTTTCCTATTTGTTTGTCTTCTTTAATTTTAGCCAAGTCTTATGGATAAAGGAACGGGGGAGACTCCCGCTACTCTCAAGCACTCCTTTGCCACGTCCATGATTCCATTATCTAGTTTAATTACAAGGCTTCGCTCCTCCCTA
Silene conica	1	mt	CACGGACCTATATGTCCAAATTGC[R1]	24-21	Silene_conica_mito_82	12955	A>G	GGACGGGCGATGCTCTATGCACAGAACCCTACCCATCTTCTCCTCCTTGACAATCTTTCCTATTTGTTTGTCTTCTTTAATTTTAGCCAAGTCTTATGGATAAAGGAACGGGGGAGACTCCCGCTACTCTCAA
Silene conica	1	mt	ACGGGATAAGAACCACCCACTATG[R2]	13-4	Silene_conica_mito_82	12955	A>G	GATGCTCTATGCACAGAACCCTACCCATCTTCTCCTCCTTGACAATCTTTCCTATTTGTTTGTCTTCTTTAATTTTAGCCAAGTCTTATGGATAAAGGAACGGGGGAGACTCCCGCTACTCTCAAGCACTCCT
Silene conica	1	mt	CCGGGTCCCGTTGACCCGAGTGCT	18-11	Silene_conica_mito_82	12955	A>G	CAATCTTTCCTATTTGTTTGTCTTCTTTAATTTTAGCCAAGTCTTATGGATAAAGGAACGGGGGAGACTCCCGCTACTCTCAAGCACTCCTTTGCCACGTCCATGATTCCATTATCTAGTTTAATTACAAGGCTTCGCTCCTCCCTATCCAGACGTTAAAAAGGAAAAGTCTCGCATTCTTCCTTTTTCTTTCT
Silene conica	1	mt	GAGCATGTAGAAGCCGAATTCCTT[R2]	17-15	Silene_conica_mito_82	12955	A>G	CTTCGCTTCTGCGGACGGGCGATGCTCTATGCACAGAACCCTACCCATCTTCTCCTCCTTGACAATCTTTCCTATTTGTTTGTCTTCTTTAATTTTAGCCAAGTCTTATGGATAAAGGAACGGGGGAGACTCC
Silene conica	3	mt	ACCACCAATCAATTCTAGGAATAT[R1]	13-12	Silene_conica_mito_82	12955	A>G	TCTATGCACAGAACCCTACCCATCTTCTCCTCCTTGACAATCTTTCCTATTTGTTTGTCTTCTTTAATTTTAGCCAAGTCTTATGGATAAAGGAACGGGGGAGACTCCCGCTACTCTCAAGCACTCCTTTGCC
Silene conica	3	mt	ACAACGTATTCGAGTGAATTACAA	18-16	Silene_conica_mito_82	12955	A>G	CAATCTTTCCTATTTGTTTGTCTTCTTTAATTTTAGCCAAGTCTTATGGATAAAGGAACGGGGGAGACTCCCGCTACTCTCAAGCACTCCTTTGCCACGTCCATGATTCCATTATCTAGTTTAATTACAAGGCTTCGCTCCTCCCTATCCAGACGTTAAAAAGGAAAAGTCTCGCATTCTTCCTTTTTCTTTCTTACTCCCCCTTATAATTTACATGTCAAAATG
Silene conica	1	mt	CACACACCACATCCCATCGCCTGA[R2]	13-9	Silene_conica_mito_82	28770	A>T	TGGTACAAGGGGCCTTCGAGTGTGGAATTTTCTACTTTAATAATTACCTTCATCTCTGCCCTTCTTTTCTATCAGATGATACAAAAGGAAGTGCTTCGCAGAACCTATAAAAAAAGATATGATTGAAGCCCAA
Silene conica	1	mt	AATCGTAAATAAAATGTACGTGAG	17-6	Silene_conica_mito_82	53904	A>G	CTCCTCTCTATACTATACCTCCTCTCCCTCATGGTCGAGCATTTTTACCCTTTTACTCTGGTCGAGTCTCATTTCTATCATCTCGCCCGCATACTTTGGACTACGCCTCTCTCATCTCCTTCTTACTTTCTTTATGTAAAAAGACTCCGCCCCTAGAAAAAGAAAGGG
Silene conica	1	mt	ATCACTAATAAACTGTGGCCTGAA[R1]	20-13	Silene_conica_mito_82	53904	A>G	CATACTTTGGACTACGCCTCTCTCATCTCCTTCTTACTTTCTTTATGTAAAAAGACTCCGCCCCTAGAAAAAGAAAGGGAGGGCCTAAAACAGGAAAATTACACCGAAAGTAGGCTCAAATGCACAGAAGCTT
Silene conica	1	mt	CATCAAGAAAAGCGTTAGGCCCGT	10-9	Silene_conica_mito_82	53904	A>G	CCCTTTTACTCTGGTCGAGTCTCATTTCTATCATCTCGCCCGCATACTTTGGACTACGCCTCTCTCATCTCCTTCTTACTTTCTTTATGTAAAAAGACTCCGCCCCTAGAAAAAGAAAGGGAGGGCCTAAAACAGGAAAATTACACCGAAAGTAGGCTCAAATGCACAGAAGCTTCAGAATACTTAGAATATGGAGAAGAAGCTGCTT
Silene conica	2	cp	AAATGTTTGCGACTGACAGGTCGT	15-7	Silene_conica_mito_82	53904	A>G	CTCATGGTCGAGCATTTTTACCCTTTTACTCTGGTCGAGTCTCATTTCTATCATCTCGCCCGCATACTTTGGACTACGCCTCTCTCATCTCCTTCTTACTTTCTTTATGTAAAAAGACTCCGCCCCTAGAAAAAGAAAGGGA
Silene conica	2	cp	AATCCTTCTGTCACGAAACCCCAC	9-8	Silene_conica_mito_82	53904	A>G	TACTTTGGACTACGCCTCTCTCATCTCCTTCTTACTTTCTTTATGTAAAAAGACTCCGCCCCTAGAAAAAGAAAGGGAGGGCCTAAAACAGGAAAATTACACCGAAAGTAGGCTCAAATGCACAGAAGCTTCAGAATACTTAG
Silene conica	2	cp	AGCAAACCCAGGTCGCAACGAACG[R1]	19-17	Silene_conica_mito_82	53904	A>G	TACTTTGGACTACGCCTCTCTCATCTCCTTCTTACTTTCTTTATGTAAAAAGACTCCGCCCCTAGAAAAAGAAAGGGAGGGCCTAAAACAGGAAAATTACACCGAAAGTAGGCTCAAATGCACAGAAGCTTCA
Silene conica	3	mt	AAGCCCATAGTCTCTTGATTTGAA[R2]	25-23	Silene_conica_mito_82	53904	A>G	CTTACTTTCTTTATGTAAAAAGACTCCGCCCCTAGAAAAAGAAAGGGAGGGCCTAAAACAGGAAAATTACACCGAAAGTAGGCTCAAATGCACAGAAGCTTCAGAATACTTAGAATATGGAGAAGAAGCTGCT
Silene conica	3	mt	AGGCTGGAACGCCCCTTTCGACAT	14-13	Silene_conica_mito_82	53904	A>G	CTCTCATCTCCTTCTTACTTTCTTTATGTAAAAAGACTCCGCCCCTAGAAAAAGAAAGGGAGGGCCTAAAACAGGAAAATTACACCGAAAGTAGGCTCAAATGCACAGAAGCTTCAGAATACTTAGAAT
Silene conica	3	mt	CCCAGCTGCTTGCCGAAAAGTAAC	19-14	Silene_conica_mito_82	53904	A>G	TTTCTATCATCTCGCCCGCATACTTTGGACTACGCCTCTCTCATCTCCTTCTTACTTTCTTTATGTAAAAAGACTCCGCCCCTAGAAAAAGAAAGGGAGGGCCTAAAACAGGAAAATTACACCGAAAGTAGGCTCAAATGCACAGAAGCTTCAGAATACTTAGAATATGGAGAAGAAGCTGCTTCTGAACTGAAAG
Silene conica	3	mt	CTCGATGACCGAGAACCTCCTAAG[R2]	21-18	Silene_conica_mito_82	53904	A>G	CTTCTTACTTTCTTTATGTAAAAAGACTCCGCCCCTAGAAAAAGAAAGGGAGGGCCTAAAACAGGAAAATTACACCGAAAGTAGGCTCAAATGCACAGAAGCTTCAGAATACTTAGAATATGGAGAAGAAGCT
Silene conica	3	mt	GCCGATAGGACCTTAGTAGATATA	17-14	Silene_conica_mito_82	53904	A>G	ATACCTCCTCTCCCTCATGGTCGAGCATTTTTACCCTTTTACTCTGGTCGAGTCTCATTTCTATCATCTCGCCCGCATACTTTGGACTACGCCTCTCTCATCTCCTTCTTACTTTCTTTATGTAAAAAGACTCCGCCCCTAGAAAAAGAAAGGGAGGGCCTAAAACAGGAAAATTACACCGAAAGTAGGCTCAAATGCACAGAAGCTTCAGAATACTTA
Silene conica	3	mt	TATGAGTAAAATTTTAACATACGA[R1]	21-12	Silene_conica_mito_82	53904	A>G	TATCATCTCGCCCGCATACTTTGGACTACGCCTCTCTCATCTCCTTCTTACTTTCTTTATGTAAAAAGACTCCGCCCCTAGAAAAAGAAAGGGAGGGCCTAAAACAGGAAAATTACACCGAAAGTAGGCTCAA
Silene conica	3	mt	TTAGAAACCCACTTGGTTCAAACC[R1]	17-13	Silene_conica_mito_82	53904	A>G	TCCTTCTTACTTTCTTTATGTAAAAAGACTCCGCCCCTAGAAAAAGAAAGGGAGGGCCTAAAACAGGAAAATTACACCGAAAGTAGGCTCAAATGCACAGAAGCTTCAGAATACTTAGAATATGGAGAAGAAG
Silene conica	1	mt	AACCGCAGTTGCTGATGAAAAGTC[R2]	15-4	Silene_conica_mito_82	61275	A>G	AGAATACTTAGAAGCTGAGTGCCCTCCGGAAGGTGAATACGTGGAAGCATCCGGAAAAGCTGCCTAAGTCGAAGAAGGTAGCAAGAATTAGAGCGATAGGGGAGTTTCATAGAAAGGTTTCCCAAGACTTGAC
Silene conica	3	mt	ACAATAGAAGAATCTCCACTAGAT[R1]	21-13	Silene_conica_mito_82	64667	A>G	CACTGACTTCTTATATTAAGCGCCCACTCTTAGCCTGAGAGAGGCGACCCTTCTTTACCGGCTTGCCTACGCAGTGGGTACTCGACTGACAAGCAGATAGGAAAGGAAGGCGAAGACGCAGTAGAAGAGGGAG
Silene conica	3	mt	TCTGAGTAGAAATTTCCATTTCAA[R2]	22-15	Silene_conica_mito_82	71372	A>G	AAGAGATCTTCAAATGTCTTCTTTAATTTGCGCAAAACCGACGTCTTATCTACACGACTGTCGCACCTCAAGAGGGAAGCCCCCTAAAAAAGAGGGGCAGGAGCGAGATCCTATTAAGTTCGTTCTTCTTAAG
Silene conica	3	cp	GAATAATCCTTCTCCTTAACGCAT	9-3	Silene_conica_mito_83	1552	A>C	CAAAAGGTAGTAGAAGGGCATGAGACTCGACTGCTAAGTAGAGGTGGTTTACCAAGCATCACAAGGAGGGGGTCTAGTTTCACTCGATGGGGGGTTTTTTCTTTTAGATTCTGGCTCATCCTCTCTTACCGGGCCTCTTATCTCGTTCTCACATTTCGAGCAATCCTTGTCAGTCCTT
Silene conica	3	mt	CCAAACACTCAGCCGAGAGTGAGA	28-8	Silene_conica_mito_83	1552	A>C	GAGACTCGACTGCTAAGTAGAGGTGGTTTACCAAGCATCACAAGGAGGGGGTCTAGTTTCACTCGATGGGGGGTTTTTTCTTTTAGATTCTGGCTCATCCTCTCTTACCGGGCCTCTTATCTCGTTCTCACATTTCGAGCAATCCTTGTCAGTCCTTTCTCTTTTATTTGCTTTATTCCCGACGAATACCCCGGTTTTAGATTCTTACTTTTGCATATAACG
Silene conica	1	cp	AAGGCCCATTTGCGGAGTGATCTA[R1]	19-15	Silene_conica_mito_83	4783	C>G	GCTACGACTTAAAAAAACGAAGACGAAGAATGAAGGAGCATGCACCCCTCTTATAAGAACTCAACTGGAGCAGAGTCATCCAGACTATAGTGGGCGTGGAGCGAAATCTTGCCCTCTTTCTTGAGAACAAGAG
Silene conica	1	mt	ATACGAAATGGAGCAACTCGCCAT	19-19	Silene_conica_mito_83	17016	A>G	TAAAATTGATCGAGATTGAGCCTTTTATCTTAAGAAGAGAGGTTTGGTCGTCGAAAAAGAGAGCCTTAACTAGTAAGAGGATCCCTTAGCAAGCAACCTCACCATTGTCTGGTCAATTCTGTATTCCTGGACTTTGTAATTGAACTGTGTTCCTCACTAACTTACTTACTACTTAATATAGGCTCATCAGGATTTGACTAGACTTACCAGCCGGAGATCGCCACAAGA
Silene conica	1	mt	ACCCAAATTTGATCCATTAAACGT[R1]	22-13	Silene_conica_mito_83	17016	A>G	TAACTAGTAAGAGGATCCCTTAGCAAGCAACCTCACCATTGTCTGGTCAATTCTGTATTCCTGGACTTTGTAATTGAACTGTGTTCCTCACTAACTTACTTACTACTTAATATAGGCTCATCAGGATTTGACT
Silene conica	2	cp	AGGTGATGCCTCTACCCTGTGGAG[R1]	11-9	Silene_conica_mito_83	17016	A>G	CTCAATTTTGGTTTTCATTAGGCCCCTGCCTCCTAAAATTGATCGAGATTGAGCCTTTTATCTTAAGAAGAGAGGTTTGGTCGTCGAAAAAGAGAGCCTTAACTAGTAAGAGGATCCCTTAGCAAGCAACCTC
Silene conica	2	cp	AGTTGCCATTCACCCAAGAAAGAC[R2]	11-3	Silene_conica_mito_83	17016	A>G	TTTTATCTTAAGAAGAGAGGTTTGGTCGTCGAAAAAGAGAGCCTTAACTAGTAAGAGGATCCCTTAGCAAGCAACCTCACCATTGTCTGGTCAATTCTGTATTCCTGGACTTTGTAATTGAACTGTGTTCCTC
Silene conica	2	cp	ATGTCTTCCATGCCTTAGAGTTCA	13-10	Silene_conica_mito_83	17016	A>G	CTTTTATCTTAAGAAGAGAGGTTTGGTCGTCGAAAAAGAGAGCCTTAACTAGTAAGAGGATCCCTTAGCAAGCAACCTCACCATTGTCTGGTCAATTCTGTATTCCTGGACTTTGTAATTGAACTGTGTTCCTCACTAACTTACTTACTACTTAATATAGGCTCATCAGGATTTGACTAGACTTACCAGCCGGAGATCGCCACAAG
Silene conica	2	cp	CAAATCTAAAAATTCGGTAACACG	10-6	Silene_conica_mito_83	17016	A>G	CGTCGAAAAAGAGAGCCTTAACTAGTAAGAGGATCCCTTAGCAAGCAACCTCACCATTGTCTGGTCAATTCTGTATTCCTGGACTTTGTAATTGAACTGTGTTCCTCACTAACTTACTTACTACTTAATATAGGCTCATCAGGATTTGACTAGACTTACCAGCCGGAGATCGCCACAAGAGCACGTTTCAGTTCTTGTT
Silene conica	2	cp	CCTTCATCCCAGTAGTTGCATCGC[R2]	11-9	Silene_conica_mito_83	17016	A>G	AAGAGAGCCTTAACTAGTAAGAGGATCCCTTAGCAAGCAACCTCACCATTGTCTGGTCAATTCTGTATTCCTGGACTTTGTAATTGAACTGTGTTCCTCACTAACTTACTTACTACTTAATATAGGCTCATCA
Silene conica	2	cp	CGAGCGGGTATAGTAGAATATATA[R2]	8-7	Silene_conica_mito_83	17016	A>G	AAATTGATCGAGATTGAGCCTTTTATCTTAAGAAGAGAGGTTTGGTCGTCGAAAAAGAGAGCCTTAACTAGTAAGAGGATCCCTTAGCAAGCAACCTCACCATTGTCTGGTCAATTCTGTATTCCTGGACTTT
Silene conica	2	cp	ACATGAGCGACTTGTCCTACTTAA	12-7	Silene_conica_mito_83	17016	A>G	CAGGGCTGCTTTGTCATAGGTGCCCCTTTTTGGAGAGGTGCTTCGGCAGGTAAAGAAGGAATCTCGTCCATTTCTTTCTCAATTTTGGTTTTCATTAGGCCCCTGCCTCCTAAAATTGATCGAGATTGAGCCTTTTATCTTAAGAAGAGAGGTTTGGTCGTCGAAAAAGAGAGCCTTAACTAGTAAGAGGATCCCTTAGCAAGCAACCTCACCATTGTCT
Silene conica	3	cp	CCCAAGAACGCCGATCAAGCTATT	11-9	Silene_conica_mito_83	17016	A>G	TAAGAAGAGAGGTTTGGTCGTCGAAAAAGAGAGCCTTAACTAGTAAGAGGATCCCTTAGCAAGCAACCTCACCATTGTCTGGTCAATTCTGTATTCCTGGACTTTGTAATTGAACTGTGTTCCTCACTAACTTACTTACTACTTAATATAGGCTCATCAGGATTTGACTAGACTTACCAGCCGGA
Silene conica	3	mt	AGGCAACAGGCACGTCTTACGAGC	33-5	Silene_conica_mito_83	17016	A>G	GAATCTCGTCCATTTCTTTCTCAATTTTGGTTTTCATTAGGCCCCTGCCTCCTAAAATTGATCGAGATTGAGCCTTTTATCTTAAGAAGAGAGGTTTGGTCGTCGAAAAAGAGAGCCTTAACTAGTAAGAGGATCCCTTAGCAAGCAACCTCACCATTGTCTGGTCAATTCTG
Silene conica	3	mt	CTTTCGCGGGACGCCGAAAAAATA	26-25	Silene_conica_mito_83	17016	A>G	AAGAGAGCCTTAACTAGTAAGAGGATCCCTTAGCAAGCAACCTCACCATTGTCTGGTCAATTCTGTATTCCTGGACTTTGTAATTGAACTGTGTTCCTCACTAACTTACTTACTACTTAATATAGGCTCATCAGGATTTGACTAGACTTACCAGCCGGAGATCGCCACAAGAGCACGTTT
Silene conica	3	mt	GTCTTCCCATACTGATCAATACAG	16-12	Silene_conica_mito_83	17016	A>G	TAAAATTGATCGAGATTGAGCCTTTTATCTTAAGAAGAGAGGTTTGGTCGTCGAAAAAGAGAGCCTTAACTAGTAAGAGGATCCCTTAGCAAGCAACCTCACCATTGTCTGGTCAATTCTGTATTCCTGGACTTTGTAATTGAACTGTGTTCCTCACTAACTTACTTA
Silene conica	3	mt	CCCCCCCGCACGCTACGCTTTTAT[R2]	19-17	Silene_conica_mito_83	17016	A>G	TAGTAAGAGGATCCCTTAGCAAGCAACCTCACCATTGTCTGGTCAATTCTGTATTCCTGGACTTTGTAATTGAACTGTGTTCCTCACTAACTTACTTACTACTTAATATAGGCTCATCAGGATTTGACTAGAC
Silene conica	1	cp	AACTGGCAAGCCTCACGAACCTAT	28-23	Silene_conica_mito_83	32477	A>T	GACAAGAACTGAGCGTATCCCCGCCCGTGCTATCTGGTGAGCAGTTGAGCGCGCCAACGATGCTTGATTACTCCTCTTATCCCGAGCAAGACCCCTTAGGAGGGGCCGTTGGGAATTGGTAACTTCCAAAGAATAGGATATGATCTCATATGATCGACGACAAGGACTAGTAAACCGGGCAGACGTGGTGAGCATATGTTAGAGCTCTCGA
Silene conica	2	cp	GGCCGAAGAATTGGCTTCGGAATG	9-5	Silene_conica_mito_83	32477	A>T	AGCCAAGCATAAAGAGAGGAGGGTCTTTTCTTTTAAGGGAAGAGCTAAAGACAAGAACTGAGCGTATCCCCGCCCGTGCTATCTGGTGAGCAGTTGAGCGCGCCAACGATGCTTGATTACTCCTCTTATCCCGAGCAAGACCCCTTAGGAGGGGCCGTTGGGAATTGGTAA
Silene conica	1	mt	AAAATACAGAACCCGCCTCCGCAA[R2]	13-7	Silene_conica_mito_83	32989	A>T	TGAAACTCTCGATCCTTATCTGACGGGCGTTTCAGGTAAAGCCTAAAAGAGACCTATTTCAGATGCATGGCTTGAGCGCGCGGATAGACCCACCTTGTTTACAAAATTAAAGGGCTTTGAAAAGTAGGATCTA
Silene conica	1	cp	CAGCAAGACATACATCGAAAAAGT[R2]	11-8	Silene_conica_mito_83	39234	A>C	TGGGGGATATGGAATGGGATCATATTTAAAGGATCTCACTAGTTATGTTAGGGATGATAGAAGGAATCAACTCAATACCAAATATATGAGACCCGTAAGTAGAAAAAGGGCGTCGATGCTTTCACTTGCTCAG
Silene conica	1	mt	ATCCGCATGGACGCCTGTTTAGGA	17-15	Silene_conica_mito_83	39234	A>C	GAAATCAAAGTCCGGTATAGCAAGCAATACAGCGGGTGTCATTTAAGTTAAGTTAGGATAGATGGGGGATATGGAATGGGATCATATTTAAAGGATCTCACTAGTTATGTTAGGGATGATAGAAGGAATCAACTCAATACCAAATATATGAGACCCGTAAGTAGAAAAAGGGCGTCGATGCTTTCACTTGCTCAGGCCGAGTCTAAACTGGTAAT
Silene conica	1	mt	GTTATTCCGTAATACTGCCCTTAA	20-9	Silene_conica_mito_83	39234	A>C	TCAAAGTCCGGTATAGCAAGCAATACAGCGGGTGTCATTTAAGTTAAGTTAGGATAGATGGGGGATATGGAATGGGATCATATTTAAAGGATCTCACTAGTTATGTTAGGGATGATAGAAGGAATCAACTCAATACCAAATATATGAGACCCGTAAGTAGAAAAAGGGCGTCGATGCTTTCACTTGCTCAGGCCGAGTCTAAACTGGTAATTAATTAGATG
Silene conica	3	cp	ACAAACAACGAAACAATAATCCTT	14-3	Silene_conica_mito_83	39234	A>C	GTTAGGATAGATGGGGGATATGGAATGGGATCATATTTAAAGGATCTCACTAGTTATGTTAGGGATGATAGAAGGAATCAACTCAATACCAAATATATGAGACCCGTAAGTAGAAAAAGGGCGTCGATGCTTTCACTTGCTCAGGCCGAGTCTAAACTGGTA
Silene conica	3	cp	ACAATGTCCTTCCATGATGACCAT[R1]	13-9	Silene_conica_mito_83	39234	A>C	CATTTAAGTTAAGTTAGGATAGATGGGGGATATGGAATGGGATCATATTTAAAGGATCTCACTAGTTATGTTAGGGATGATAGAAGGAATCAACTCAATACCAAATATATGAGACCCGTAAGTAGAAAAAGGG
Silene conica	3	mt	CAGAACTGCATCGTGCGAAAGCAG[R2]	17-13	Silene_conica_mito_83	39234	A>C	AGTCCGGTATAGCAAGCAATACAGCGGGTGTCATTTAAGTTAAGTTAGGATAGATGGGGGATATGGAATGGGATCATATTTAAAGGATCTCACTAGTTATGTTAGGGATGATAGAAGGAATCAACTCAATACC
Silene conica	3	mt	CGAATGTTAACAGAGAAAATAAGA[R2]	33-12	Silene_conica_mito_83	39234	A>C	ATTAAGAAAGCAAACTGGCTGGAAATCAAAGTCCGGTATAGCAAGCAATACAGCGGGTGTCATTTAAGTTAAGTTAGGATAGATGGGGGATATGGAATGGGATCATATTTAAAGGATCTCACTAGTTATGTTA
Silene conica	1	mt	CCGCCGAGGAAAGAAGTCGTGGGT	16-16	Silene_conica_mito_83	53103	A>G	AAAGAGGGAGCACTCTATAAGAGAAAGCAGACCCTATAAAACGAGAAACCCCAAAGGAATCCTCGAGTACTACTTCAAGGCAGACAGACGTTATGAGCAATATAGGCGGAAAGGTAAGAAGAATGGGCGTACTCGGGGACTTGGGTCGTTACCTACCAACCTCTATCATATGAGGCATGCTGGGGAGGCGCGCATCTCCTTAACCAAATTCTACA
Silene conica	1	mt	GCCCACCGAAAGGGGCCTAGCCCG[R2]	15-13	Silene_conica_mito_83	53103	A>G	AAGGAATCCTCGAGTACTACTTCAAGGCAGACAGACGTTATGAGCAATATAGGCGGAAAGGTAAGAAGAATGGGCGTACTCGGGGACTTGGGTCGTTACCTACCAACCTCTATCATATGAGGCATGCTGGGGA
Silene conica	1	mt	AACTTACAAGATAATTCGGCGCGT[R2]	17-8	Silene_conica_mito_83	53103	A>G	GAGTACTACTTCAAGGCAGACAGACGTTATGAGCAATATAGGCGGAAAGGTAAGAAGAATGGGCGTACTCGGGGACTTGGGTCGTTACCTACCAACCTCTATCATATGAGGCATGCTGGGGAGGCGCGCATCT
Silene conica	3	cp	CAGCCGGGTTCCTAAGCAAGAAGG	16-15	Silene_conica_mito_83	53103	A>G	TAAGAAGAATGGGCGTACTCGGGGACTTGGGTCGTTACCTACCAACCTCTATCATATGAGGCATGCTGGGGAGGCGCGCATCTCCTTAACCAAATTCTACAGACTCTCTCTGGAAGAATGCAGCCATACAT
Silene conica	3	mt	GCATCACACTCCTATTTAGACTTG[R1]	20-16	Silene_conica_mito_83	53103	A>G	CTATAAAACGAGAAACCCCAAAGGAATCCTCGAGTACTACTTCAAGGCAGACAGACGTTATGAGCAATATAGGCGGAAAGGTAAGAAGAATGGGCGTACTCGGGGACTTGGGTCGTTACCTACCAACCTCTAT
Silene conica	3	mt	ACATCCAGCTGAAGTGAAAAGCTA	20-16	Silene_conica_mito_83	53103	A>G	AAAGAAAGAGGGAGCACTCTATAAGAGAAAGCAGACCCTATAAAACGAGAAACCCCAAAGGAATCCTCGAGTACTACTTCAAGGCAGACAGACGTTATGAGCAATATAGGCGGAAAGGTAAGAAGAATGGGCGTACTCGGGGACTTGGGTCGTTACCTACCAACCTCTATCATATGAGGCATGCTGGGGAG
Silene conica	3	mt	ACCTCGGTTTATAGTGCAGGAAAC	10-9	Silene_conica_mito_83	53103	A>G	CAGACAGACGTTATGAGCAATATAGGCGGAAAGGTAAGAAGAATGGGCGTACTCGGGGACTTGGGTCGTTACCTACCAACCTCTATCATATGAGGCATGCTGGGGAGGCGCGCATCTCCTTAACCAAATTCTACAGACTCTCTCTGGAAGAATGCAGCCATACATGAAATGAAAAACCCCATTGCAGCAGCAGTGAATACACAAATGGATG
Silene conica	3	mt	ATAACGCGATGGGCTTGTTGAAAT[R1]	13-12	Silene_conica_mito_83	53103	A>G	TATAGGCGGAAAGGTAAGAAGAATGGGCGTACTCGGGGACTTGGGTCGTTACCTACCAACCTCTATCATATGAGGCATGCTGGGGAGGCGCGCATCTCCTTAACCAAATTCTACAGACTCTCTCTGGAAGAAT
Silene conica	3	mt	CAAAGCCATTCCCCTCTAATATTG[R2]	19-15	Silene_conica_mito_83	53103	A>G	AAGAGAAAGCAGACCCTATAAAACGAGAAACCCCAAAGGAATCCTCGAGTACTACTTCAAGGCAGACAGACGTTATGAGCAATATAGGCGGAAAGGTAAGAAGAATGGGCGTACTCGGGGACTTGGGTCGTTA
Silene conica	2	cp	AAAACTGAAGTAGTTTCAAATCCT[R1]	10-7	Silene_conica_mito_84	6504	A>G	CGAAAGCACAAAGGAGCGCAGCCACTCTTTCTTCCCGCCGCCCCTCAAAAGAAGTCTGTGGACTTACTGTTACTGTCTATGTAATGGTCTGCTGAAGTACGCGATTGAAGTACCGAAACGCGCTAAAGGGAGT
Silene conica	3	cp	AATCCGATCAGGGAGGTACTAAAA[R2]	16-4	Silene_conica_mito_84	6504	A>G	CATACTCTTTATCCAGCCCTTCTCTGTCGAAAGCACAAAGGAGCGCAGCCACTCTTTCTTCCCGCCGCCCCTCAAAAGAAGTCTGTGGACTTACTGTTACTGTCTATGTAATGGTCTGCTGAAGTACGCGATT
Silene conica	1	cp	CAAGACGACCAGTATTAACTTGCA	17-17	Silene_conica_mito_84	12038	A>C	TAGAACTTAAGGAGGTCAATTTACAAAGAACACTGCCGCGCTCAATAGAGTCTAACCCGAGGGGTTACAGTAGCATATCTCATATCTTATCACAATCTTAGCACGGGATGCTCCCCACAGTAGGGCTTGGTTCTAATTCCCTCGTGTATCTCAGAGGAGTTTTGTTAATTAATATAGTTAGCGTTAAGAGACT
Silene conica	1	mt	ACTAAGGCCAGTTAGCTGCCACCT[R2]	18-8	Silene_conica_mito_84	12038	A>C	GGTCCTATTACACGAGAAATCAAGGCATTTAGTAGAACTTAAGGAGGTCAATTTACAAAGAACACTGCCGCGCTCAATAGAGTCTAACCCGAGGGGTTACAGTAGCATATCTCATATCTTATCACAATCTTAG
Silene conica	3	mt	CCACAACCAAAGTCGACACCAGAC	37-6	Silene_conica_mito_84	12038	A>C	CTAACCCGAGGGGTTACAGTAGCATATCTCATATCTTATCACAATCTTAGCACGGGATGCTCCCCACAGTAGGGCTTGGTTCTAATTCCCTCGTGTATCTCAGAGGAGTTTTGTTAATTAATATAGTTAGCGTTAAGAGACTCCTTTATCTTTCCACCAGCCAAAAGACGGGCTAAACCAACTCATAGAACC
Silene conica	1	cp	AAGCGAAATGCAGGGGTTATATAC	18-17	Silene_conica_mito_84	29056	A>G	ACTATATATATAAGATGGATCAGGCAGGGAGAAGCGTGTTAACGAGAGGGGATAGCCCGACAGGGCGGAGACTGAGGTACGCTGGATAAGAGAGAGAGAAATGAGACGCAGAGCGAAAGGACCCGCAGGGGACGGACTTGACTGATAAGGATCGGGCAAAGAGGCTCGGTTGCATACGATAAGGTGATTACGCTTGAGCAAAGC
Silene conica	1	cp	AGTAAAACTCACATCCTCGGTGTA	25-12	Silene_conica_mito_84	29056	A>G	AGGGAGAAGCGTGTTAACGAGAGGGGATAGCCCGACAGGGCGGAGACTGAGGTACGCTGGATAAGAGAGAGAGAAATGAGACGCAGAGCGAAAGGACCCGCAGGGGACGGACTTGACTGATAAGGATCGGGCAAAGAGGCTCGGTTGCATACGATAAGGTGATTACGCTTGAG
Silene conica	2	cp	CTGTGGAGCCAATTGAGGCCGGAA[R1]	15-11	Silene_conica_mito_84	29056	A>G	GACAGGGCGGAGACTGAGGTACGCTGGATAAGAGAGAGAGAAATGAGACGCAGAGCGAAAGGACCCGCAGGGGACGGACTTGACTGATAAGGATCGGGCAAAGAGGCTCGGTTGCATACGATAAGGTGATTAC
Silene conica	3	mt	AAAAACACAGAGTGTGCGCCACGT	23-14	Silene_conica_mito_84	29056	A>G	AAGGACCCGCAGGGGACGGACTTGACTGATAAGGATCGGGCAAAGAGGCTCGGTTGCATACGATAAGGTGATTACGCTTGAGCAAAGCGGTAATGTCGACTAGAAGGAGATAAGGATATAGGCGTAGAGAGAGTACCACAGATGCGGACTGGTAGTACGACGATGGGACGTGCTTATTCTCTAAAC
Silene conica	3	mt	CGAAAGACTTCCGACTGACTAGAA[R2]	20-10	Silene_conica_mito_84	29056	A>G	AGGACCCGCAGGGGACGGACTTGACTGATAAGGATCGGGCAAAGAGGCTCGGTTGCATACGATAAGGTGATTACGCTTGAGCAAAGCGGTAATGTCGACTAGAAGGAGATAAGGATATAGGCGTAGAGAGAGT
Silene conica	1	cp	GAGAATTTATATTTCCTCGAGCTT[R2]	19-12	Silene_conica_mito_85	1035	A>G	AACCAGAGGTAATGCATATACGTATATAAGATAAAAAAATTAATTGAAGCAAATACATAAAGAAAAGGGGGGGCTCTCTGCTTAAAAAGAGAGTAGGAAGTTAAAGCAACTGTAAAGGGGTGAGAAAGAAGAT
Silene conica	1	mt	CAGATGTAGGGCGGCGAGATGCAA	17-11	Silene_conica_mito_85	1035	A>G	TGAGCAAAAGACCTCAAGGCTGGCCAATCTTTTCGTGAAACCAGAGGTAATGCATATACGTATATAAGATAAAAAAATTAATTGAAGCAAATACATAAAGAAAAGGGGGGGCTCTCTGCTTAAAAAGAGAGTAGGAAGTTAAAGCAACTGTAAAGGGGTGAGAAAGAA
Silene conica	1	mt	CCTGGACCTGAGTCAACATAACAT	18-8	Silene_conica_mito_85	1035	A>G	AGTCTGCACTCTCGCTCTCTTTCCTCCGGAAGTCTATGTGAGCAAAAGACCTCAAGGCTGGCCAATCTTTTCGTGAAACCAGAGGTAATGCATATACGTATATAAGATAAAAAAATTAATTGAAGCAAATACATAAAGAAAAGGGGGGGCTCTCTGCTTAAAAAGAGAGTAGGAAGTTA
Silene conica	2	cp	GGAGATAGTGACTCTGCTAAACAT	14-12	Silene_conica_mito_85	1035	A>G	TACTTTACAAAGTAAGAAAGAAAGTCTGCACTCTCGCTCTCTTTCCTCCGGAAGTCTATGTGAGCAAAAGACCTCAAGGCTGGCCAATCTTTTCGTGAAACCAGAGGTAATGCATATACGTATATAAGATAAAAAAATTAATTGAAGCAAATACATAAAGAAAAGGGGGGGCTCTCTGCTTAAAAAGAGAGTAGGAAGTTAA
Silene conica	2	cp	CGATTGGTATCAGAGAGCGGAAAA	12-4	Silene_conica_mito_85	1035	A>G	ACCAGAGGTAATGCATATACGTATATAAGATAAAAAAATTAATTGAAGCAAATACATAAAGAAAAGGGGGGGCTCTCTGCTTAAAAAGAGAGTAGGAAGTTAAAGCAACTGTAAAGGG
Silene conica	2	cp	CTCAGTCTCTAAGTTCTAAGGATA	18-7	Silene_conica_mito_85	1035	A>G	CTCTTTCCTCCGGAAGTCTATGTGAGCAAAAGACCTCAAGGCTGGCCAATCTTTTCGTGAAACCAGAGGTAATGCATATACGTATATAAGATAAAAAAATTAATTGAAGCAAATACATAAAGAAAAGGGGGGGCTCTCTGCTTAAAAAGAGAGTAGGAAGTT
Silene conica	3	cp	CCGACTGACATCGACCACTAGAAA	15-5	Silene_conica_mito_85	1035	A>G	AAAAAGAACTAGAAAGGGATATACATATATAAGAATGTTAAGAAATTTTACTTTACAAAGTAAGAAAGAAAGTCTGCACTCTCGCTCTCTTTCCTCCGGAAGTCTATGTGAGCAAAAGACCTCAAGGCTGGCCAATCTTTTCGTGAAACCAGAGGTAATGCATATACGTATATAAGATAAAAAAATTAATTGAAGCAAATACATAAAGAAAAGGGGGGGCTCTCTGCTT
Silene conica	3	mt	CAAGCCAACAAGGTACTTAGGGCG[R2]	18-13	Silene_conica_mito_85	1035	A>G	CATAAAGAAAAGGGGGGGCTCTCTGCTTAAAAAGAGAGTAGGAAGTTAAAGCAACTGTAAAGGGGTGAGAAAGAAGATAGGTCCATGTTCCAGGAAAGGCGCCCGAAGGGGGGTTTATCCCAATAGAAGAATC
Silene conica	3	mt	ACTGCTTAACTTTGAACGAAAGCA	14-6	Silene_conica_mito_85	1035	A>G	CTATGTGAGCAAAAGACCTCAAGGCTGGCCAATCTTTTCGTGAAACCAGAGGTAATGCATATACGTATATAAGATAAAAAAATTAATTGAAGCAAATACATAAAGAAAAGGGGGGGCTCTCTGCTTAAAAAGAGAGTAGGAAGTTAAAGCAACTGTAAAGGGGTGAGAAAGAAGATAGGTCCAT
Silene conica	3	mt	ATACAGCTATATTTTACTCTCTCC[R1]	17-12	Silene_conica_mito_85	1035	A>G	CAAAAGACCTCAAGGCTGGCCAATCTTTTCGTGAAACCAGAGGTAATGCATATACGTATATAAGATAAAAAAATTAATTGAAGCAAATACATAAAGAAAAGGGGGGGCTCTCTGCTTAAAAAGAGAGTAGGAA
Silene conica	3	mt	ACACCCGCCTCGCACCATCAACGT[R2]	13-6	Silene_conica_mito_85	1035	A>G	CGTGAAACCAGAGGTAATGCATATACGTATATAAGATAAAAAAATTAATTGAAGCAAATACATAAAGAAAAGGGGGGGCTCTCTGCTTAAAAAGAGAGTAGGAAGTTAAAGCAACTGTAAAGGGGTGAGAAAG
Silene conica	3	mt	CGATTCAGTGCGGCCCGATACCCA	22-17	Silene_conica_mito_85	1035	A>G	TATGTGAGCAAAAGACCTCAAGGCTGGCCAATCTTTTCGTGAAACCAGAGGTAATGCATATACGTATATAAGATAAAAAAATTAATTGAAGCAAATACATAAAGAAAAGGGGGGGCTCTCTGCTTAAAAAGAGAGTAGGAAGTTAAAGCAACTGTAAAGGGG
Silene conica	3	mt	ACTCACATGCGTATATGACAATAA[R1]	19-12	Silene_conica_mito_85	8849	A>G	CCCCTCCTCTTGTTTTCCTTCGAACAGAATAGAAGGAAGCAACAGCGCTCCCATCTACATGAGTGGCAGCCGCCGGTTATGCTAATGCTCCAGGGAAACATGCATAATAAAATAGAGGGATCCTCCGCCTCTA
Silene conica	1	cp	AAAGCAAAAATACGGAGCAGACGT	23-22	Silene_conica_mito_85	21678	A>G	AGCTGCTCGAGTATTAAGTAATGCCTTTTGTGAGAGAAAGTGATGACATATTAATCGCAGGATGCCACAAAAAGGCTGCTCACAATAAAAAGGGTTCTGGACCAAAGCTTGGTTTTAGAGGATTGTGGTCGGCGGGTGTGGCCCATGACTAAGT
Silene conica	3	mt	ACCTAAAACATGTGATATTGAATC[R1]	22-16	Silene_conica_mito_85	45741	C>T	TCCCTCTCGGTAACAACACTCGAGTCCACATGGGTTTATCTCCTCCTTGGTAGTCGTCCTCGCTTCGCTCTCCTCACGGTCGACAGGATCAATCCCGTCCTGGCTATCTCCCTCTCGGTAACAACACTCGAGT
Silene conica	2	cp	ATAGTCGTCAATGGAAATGTGCTA[R1]	22-8	Silene_conica_mito_85	53388	A>G	TCCTTTGTAATTCTCTAGGTCTACTGAGCCTTTGTACTCTTCATGTGTCCGATCAAAGCGCTTTCCCTCTGAGTAATTCTTCTTTTGCTAACCCTTCTTTTAACTAGAAAGGGAAGCCCCGCTTGGAGAGGCT
Silene conica	2	cp	ACGCATGCACATCCGTTAACAACT	17-11	Silene_conica_mito_85	64681	C>G	GTCTAGGGTGATGCCCTTGTTCTTCGACCCGAAGTGGTAACGGCTGCAAAGGAGATGGAAAAGAGACTTGAGTGGTAACTAACGACCAGAAAAGGGACTAGACCAGAGAATAGAAGGGGATTTAATGCTCGACCAACGGGAGAAGAGGTAGAATTTTCTTGGCTA
Silene conica	3	mt	AAATCTTTAACTCACAGGAGTACT	20-16	Silene_conica_mito_86	57303	A>G	GGAAATCTTCGTTGAACTCTGAATCCTGAATAAAGCGTCTTTCTTAAACTTGGATCCCGGGGCGAACTCTTCCCTTCTTTTAAGTAGGATTCCGGTCTCATTGGTCTTTCTGTTCCCTTTCTTTCGTATAGGCCTAGGATTCTCTTTGGTTGGGCGCTAGTTCAATCTTAATCTCAGCAAAAGTAAAGAGCTTTATCTAAACCATAATACAAGGCATGTTCTGCTTTAGCAAG
Silene conica	2	cp	CACCACAAGACAGCCAGCCCATCA	11-9	Silene_conica_mito_87	58693	A>G	CTCTGATTGTTGAGTCAGACTTCGTCTCTCGTTCGTTAGCCATATCGTATGTATACCGTAAAAGAAAGAGAAGGAGTTCAACTAGTAAACCAATGACAGGGCGGGTTGCGAAAGGTTCAACCAACGGTATTACGTTCCTCACCACAAAGAGCTTGACTATATCCCTTAATATACGAACA
Silene conica	3	cp	ACATGTAACCCAGTAAAGGCCAAG[R1]	14-14	Silene_conica_mito_87	58693	A>G	ATCGTATGTATACCGTAAAAGAAAGAGAAGGAGTTCAACTAGTAAACCAATGACAGGGCGGGTTGCGAAAGGTTCAACCAACGGTATTACGTTCCTCACCACAAAGAGCTTGACTATATCCCTTAATATACGA
Silene conica	3	mt	CGTAGTTCGCAAGTCCAGATATGC	28-24	Silene_conica_mito_87	58693	A>G	AGAAGGAGTTCAACTAGTAAACCAATGACAGGGCGGGTTGCGAAAGGTTCAACCAACGGTATTACGTTCCTCACCACAAAGAGCTTGACTATATCCCTTAATATACGAACATATACGAAAAGGAAAGTCGAGTATTCATCCAAGCCTGGAGAATGCTGCGTCCAGCCTATTTCCCTATCACGAGACGAAAGACCCCTC
Silene conica	3	mt	GATAATAAAAACTCCCTAGAAGCA[R1]	25-23	Silene_conica_mito_87	58693	A>G	AGAAAGAGAAGGAGTTCAACTAGTAAACCAATGACAGGGCGGGTTGCGAAAGGTTCAACCAACGGTATTACGTTCCTCACCACAAAGAGCTTGACTATATCCCTTAATATACGAACATATACGAAAAGGAAAG
Silene conica	1	mt	CCAGATGCGACATGGGGAGACACC[R2]	16-11	Silene_conica_mito_88	59873	A>G	GTCTTTCTTAATGTACAAGCCCCTATAAAGAAAGGATTGATTCTTTATCTATTTGCTGCATATTAAGAGTTGGGCTCTTTTCTACGCTATCACCCAACGCCGACCCCGGAGTAAGATTCTAAAGAATGGAACG
Silene conica	3	mt	GGTCGTCGCCTGGTAGTATCATCA[R2]	27-17	Silene_conica_mito_88	59873	A>G	GGTCTTTCTTAATGTACAAGCCCCTATAAAGAAAGGATTGATTCTTTATCTATTTGCTGCATATTAAGAGTTGGGCTCTTTTCTACGCTATCACCCAACGCCGACCCCGGAGTAAGATTCTAAAGAATGGAAC
Silene conica	3	mt	CCTACAACGTCTGCCCTTATTTGT	23-19	Silene_conica_mito_88	59873	A>G	CTATCACCCAACGCCGACCCCGGAGTAAGATTCTAAAGAATGGAACGAACCCATCTCATAGAAGACAAAAGCAAGGCATTCTTTATTTACCTGCCCATGTAACTGCCTTAAGTGAAGTGACTCTGACCCTAGACTCTCCCCTTATCTTAGAATTTTGGTTGTAA
Silene conica	2	cp	TACAGCAGGAGTTGAACGATTTCT	19-8	Silene_conica_mito_89	43950	A>G	TAGATACTAAGTAAAGCCCGAAAGAATAGAGGGGAGATAGTGCGAAAAGAGCCGAAAGAGTCTCCTTTTTTTCGATGAAATTCTTGCATTTTTTGAAAAGTGTAACAAGACAGGCTTATTTGGTTGAAATGGCCTTATTAAATACGTTTGTTTCGCGCTTTTTCTCCTTCTAGTCTACGCTTTCTCCTCTTC
Silene conica	3	mt	CGCGATCTTTAGGCGTGAACCTGT[R2]	18-17	Silene_conica_mito_89	43950	A>G	CGCTTGAATTGGCTAATGCATATACGTATATAAGAATGAAGAAGTTAGATACTAAGTAAAGCCCGAAAGAATAGAGGGGAGATAGTGCGAAAAGAGCCGAAAGAGTCTCCTTTTTTTCGATGAAATTCTTGCA
Silene conica	1	mt	CATCTCAAATCCGCTTAAGCTCGA[R1]	21-20	Silene_conica_mito_9	61880	A>G	CTTTCACACAAGGGAGCTATCCACTCGGCAGGCAGCTTTCTCCAATTCTACTAACGGAACGACGGGAAGCAGGCGCTACGGGTCAATCAATGAGGCAAGCGGGGGCGCGGCTTCTCTCCTTTCACTAAGTCAC
Silene conica	3	mt	AGACTTACTTGCTCAGACCTAGTC[R1]	30-16	Silene_conica_mito_9	70497	A>G	AAAGAGACTCTATTAATTTTAAGTATACCACAAGCTAGGAGGAGGGGCTCTCGGGTAGCGGTTCGGTATATTTTTTTCTCATACTACTAGCTAGAAGGTCCCCTTGTCACGAGCAGGTTCCACAGCTACAAGT
Silene conica	3	mt	CATCTAAGGGCGCTCATAAATGAA	17-17	Silene_conica_mito_9	102406	A>G	TGCCAATCTCAGTTCAATCTTCAGCCATAGCTCATTCTCCTCTTCAGTCTAATCTTTAGTTGCTTCAACTCGAAAGGGAGGAGCTTGAAAAGAGTTCAAAGGATCGTAAAGGGGTATCTGTATATAAGAGCAAAGGC
Silene conica	2	cp	AAAATAGTGTAGACCTACCAAAGA	9-6	Silene_conica_mito_9	122003	C>G	CCCTTTCCTTACCAGTCAAGCCCCCTTCGGGTCGTCTCCTTCGTGCCTCAGTCTCCCCCCCGCAGGGTATCTCCCTATCGGTCGCCAGGCTACGCTCCTCTTTGGGCTTATCTCCTTAGCAGTCGCCAGGCTACGCTCCTCT
Silene conica	3	cp	CAGTAGCAGCGACGATCATTAACA[R2]	17-7	Silene_conica_mito_90	59793	A>G	TAACCTCGGCTGCTAAGTAGAGGAGAAATAGGCTCCGCTGAGGTACGAAGTGGAGGAGAAGGCGAAGACTAGAAGGAGAGGATCGGGGGCTCTACTGACAAAGGAAGTGGAGGAGAAAGAGCGACGGTTGCAA
Silene conica	3	mt	AACGCTACAAGCTACAATTAACGC[R2]	15-12	Silene_conica_mito_90	59793	A>G	TAGAAGGAGAGGATCGGGGGCTCTACTGACAAAGGAAGTGGAGGAGAAAGAGCGACGGTTGCAAGGTGAATTCTGAGGAGAGTGAAACGAGGTCGAGGAGATAGGGAAGAAGACCTAGGTACGATTG
Silene conica	3	mt	CGTAATGGCTTGTGACGATAATAC	15-15	Silene_conica_mito_90	59793	A>G	TGACAAAGGAAGGCGAGGAGAGGTGACGAGATCGAGCATAGCGAGATAGATAAGCCAGGAAGGAGCTCGACTGCCAAGGGCCCGAAGGGGGATCGACTGGTAAGGAGAGGAGAGGATTTAACCTCGGCTGCTAAGTAGAGGAGAAATAGGCTCCGCTGAGGTACGAAGTGGAGGAGAAGGCGAAGACTAGAAGGAGAGGATCGGGGGCTCTACTGACAAAGGAAGTGGAG
Silene conica	2	cp	GCCACCAGGCCAGGATCACGGACC[R2]	10-10	Silene_conica_mito_91	5073	C>A	GACTTCCTTATGAGACAGGATCACACCCGAACATTCTTATATATGTACTTTGTCCGTCGTTGAGAAGTAAGATCTAAAACATAAGCAAGTTCACGGAAAGGAGTTCCGAGAGTTTAAAAAATTCTATAAGCCC
Silene conica	3	cp	AAAACCCTTTTTAGCCTCCAGCAT	18-12	Silene_conica_mito_91	12628	A>G	AGCTTTGCAACGCGACGGCTCTTAGGTTTCAATAGGGGTTTCCGTTCTCTAAACCACTTACTTACTGACTTATAGTCATCGGCATTCCACTCGAACCCACCTATGTATTAAGATTAAGGGGATAAAGTGAGCAACTCTGCCGTGTATCAATAGAGAGAGGAGATACGACCGCAATACGCCGCCTAAAAGGAAGCAA
Silene conica	1	cp	CCAACAAGAACATAATAACTGGCC[R2]	26-23	Silene_conica_mito_92	2875	A>G	AGGATTTAATAAAGACTCGAACATAGGAGAGCGAGGCGAGGAACGACTGACAAGGAGGTATAGTAGAGAGGGAGAGGAAGGTGGTCAAGAAGAAGAGCCTAGCTAGAGCGAGAAAAGAACCACTTCGGCCTTA
Silene conica	1	cp	ACGCTGCCCTTCCTAGCATCCGAA[R1]	21-20	Silene_conica_mito_92	2875	A>G	AGGGTGAAAGAGCGACTGAAGAATGAAGGAGATAGCCCGAAGGGGGATTGCCCGAGGTACGAGGATTTAATAAAGACTCGAACATAGGAGAGCGAGGCGAGGAACGACTGACAAGGAGGTATAGTAGAGAGGG
Silene conica	1	mt	CGACACACTTTCCTCCATCTAATA	19-8	Silene_conica_mito_92	2875	A>G	CGAACATAGGAGAGCGAGGCGAGGAACGACTGACAAGGAGGTATAGTAGAGAGGGAGAGGAAGGTGGTCAAGAAGAAGAGCCTAGCTAGAGCGAGAAAAGAACCACTTCGGCCTTATCTTCTTGGAAAGAGATGATAAGACTCGCTTGAAGCA
Silene conica	1	mt	ACATACTTGTACGACGGACACAGG[R2]	24-16	Silene_conica_mito_92	2875	A>G	ATTTAATAAAGACTCGAACATAGGAGAGCGAGGCGAGGAACGACTGACAAGGAGGTATAGTAGAGAGGGAGAGGAAGGTGGTCAAGAAGAAGAGCCTAGCTAGAGCGAGAAAAGAACCACTTCGGCCTTATCT
Silene conica	1	mt	GAGTGTTAATTCGCGCTAACAAGA	15-11	Silene_conica_mito_92	2875	A>G	AAAAGCAGAGGGTGAAAGAGCGACTGAAGAATGAAGGAGATAGCCCGAAGGGGGATTGCCCGAGGTACGAGGATTTAATAAAGACTCGAACATAGGAGAGCGAGGCGAGGAACGACTGACAAGGAGGTATAGTAGAGAGGGAGAGGAAGGTGGTCAAGAAGAAGAGCCTAGCTAGAGCGAGAAAAGAACCACTTCGGCCTT
Silene conica	1	mt	CACGGCTCCACACTCACCACCAAA[R1]	10-9	Silene_conica_mito_92	2875	A>G	GAAGGGGGATTGCCCGAGGTACGAGGATTTAATAAAGACTCGAACATAGGAGAGCGAGGCGAGGAACGACTGACAAGGAGGTATAGTAGAGAGGGAGAGGAAGGTGGTCAAGAAGAAGAGCCTAGCTAGAGCG
Silene conica	1	mt	GCCAATTATTTCTGTAAAGTTCGA[R1]	22-18	Silene_conica_mito_92	2875	A>G	GAGGGTGAAAGAGCGACTGAAGAATGAAGGAGATAGCCCGAAGGGGGATTGCCCGAGGTACGAGGATTTAATAAAGACTCGAACATAGGAGAGCGAGGCGAGGAACGACTGACAAGGAGGTATAGTAGAGAGG
Silene conica	1	mt	TACGCCTCATACTCTCTGTACTAC	24-20	Silene_conica_mito_92	2875	A>G	TGGAAATCCTGTTATGCGAAAGTCATAATGGCAGAAAAGATCACCCCTTCAGATAGACTGAAAAGCAGAGGGTGAAAGAGCGACTGAAGAATGAAGGAGATAGCCCGAAGGGGGATTGCCCGAGGTACGAGGATTTAATAAAGACTCGAACATAGGAGAGCGAGGCGAGGAACGACTGACAAGGAGGTATAGTAGAGAGGGAGAGGAAGGTGGTCAAGAAGAAGAGCCTA
Silene conica	1	mt	TATCCACAAACATGTCGTACCTGC	12-9	Silene_conica_mito_92	2875	A>G	AGGTACGAGGATTTAATAAAGACTCGAACATAGGAGAGCGAGGCGAGGAACGACTGACAAGGAGGTATAGTAGAGAGGGAGAGGAAGGTGGTCAAGAAGAAGAGCCTAGCTAGAGCGAGAAAAGAACCACTTCGGCCTTATCTTCTTGGAAAGAGATGATAAGACTCGCTTGAAGCAACT
Silene conica	3	mt	AACTCGGGTTATGCCCCGCATCGA	25-13	Silene_conica_mito_92	2875	A>G	AGGTACGAGGATTTAATAAAGACTCGAACATAGGAGAGCGAGGCGAGGAACGACTGACAAGGAGGTATAGTAGAGAGGGAGAGGAAGGTGGTCAAGAAGAAGAGCCTAGCTAGAGCGAGAAAAGAACCACTTCGGCCTTATCTTCTTGGAAAGAGATGATAAGACTCGCTTGAAGCAACTTCAGATTA
Silene conica	3	mt	ACATCTGCCTATGTTAAGCACCAT	21-13	Silene_conica_mito_92	2875	A>G	GATCTCAATCACCTTTTCCCTTTTCTTTGGAAATCCTGTTATGCGAAAGTCATAATGGCAGAAAAGATCACCCCTTCAGATAGACTGAAAAGCAGAGGGTGAAAGAGCGACTGAAGAATGAAGGAGATAGCCCGAAGGGGGATTGCCCGAGGTACGAGGATTTAATAAAGACTCGAACATAGGAGAGCGAGGCGAGGAACGACTGACAAGGAGGTATAGTAGAGAGG
Silene conica	3	mt	ACTGATATAGCCTACCCACAGCAA[R2]	21-13	Silene_conica_mito_92	2875	A>G	AGAGCGACTGAAGAATGAAGGAGATAGCCCGAAGGGGGATTGCCCGAGGTACGAGGATTTAATAAAGACTCGAACATAGGAGAGCGAGGCGAGGAACGACTGACAAGGAGGTATAGTAGAGAGGGAGAGGAAG
Silene conica	3	mt	CAACCTTCGAGCCTCACGCGTAGC[R1]	28-11	Silene_conica_mito_92	2875	A>G	AGATAGCCCGAAGGGGGATTGCCCGAGGTACGAGGATTTAATAAAGACTCGAACATAGGAGAGCGAGGCGAGGAACGACTGACAAGGAGGTATAGTAGAGAGGGAGAGGAAGGTGGTCAAGAAGAAGAGCCTA
Silene conica	3	mt	GACCTCATAAACTCGCCTGTATCA	20-19	Silene_conica_mito_92	2875	A>G	TACGAGGATTTAATAAAGACTCGAACATAGGAGAGCGAGGCGAGGAACGACTGACAAGGAGGTATAGTAGAGAGGGAGAGGAAGGTGGTCAAGAAGAAGAGCCTAGCTAGAGCGAGAAAAGAACCACTTCGGCCTTATCTTCTTGGAAAGAGATGATAAGACTCGCTTGAAGCAACTTCAGATTAGACTGACGAGGAGAAT
Silene conica	3	mt	CAGTACGGCTTTGCCGTCACAATA	18-17	Silene_conica_mito_92	2875	A>G	GAAAGAGCGACTGAAGAATGAAGGAGATAGCCCGAAGGGGGATTGCCCGAGGTACGAGGATTTAATAAAGACTCGAACATAGGAGAGCGAGGCGAGGAACGACTGACAAGGAGGTATAGTA
Silene conica	3	mt	CCGTCGAAATACGAAAGCTGCAAG	16-15	Silene_conica_mito_92	2875	A>G	TGCGAAAGTCATAATGGCAGAAAAGATCACCCCTTCAGATAGACTGAAAAGCAGAGGGTGAAAGAGCGACTGAAGAATGAAGGAGATAGCCCGAAGGGGGATTGCCCGAGGTACGAGGATTTAATAAAGACTCGAACATAGGAGAGCGAGGCGAGGAACGACTGACAAGGAGGTATAGTAGAGAGGGAGAGGAAGGTGGTCAAGAAGAAGAGCCTAGCTAGAGCGA
Silene conica	3	mt	CCACGAGTACTCTCGTTAGATTGT[R2]	26-9	Silene_conica_mito_92	2875	A>G	ACATAGGAGAGCGAGGCGAGGAACGACTGACAAGGAGGTATAGTAGAGAGGGAGAGGAAGGTGGTCAAGAAGAAGAGCCTAGCTAGAGCGAGAAAAGAACCACTTCGGCCTTATCTTCTTGGAAAGAGATGAT
Silene conica	3	mt	AATGCCGGCGACCCAATCTGTAGG[R1]	23-18	Silene_conica_mito_92	11266	C>A	AACAACTGCGGTTGTGGTACGCCTTCTCATAGTTTAAGGCGAAGGGCGCACGAAGATGGGATATGTCGTTTCCGAAACTGCCCAAAGAAGCTCTACTTTTAGTTTCACCCGTGCTTTTAGGGGCGGCTTCCCG
Silene conica	1	mt	CAGCTTAAAAAGTCCTAATTATTA[R1]	7-5	Silene_conica_mito_92	19017	A>G	GAATATATAAAGAAAAGAGGGTGTATGCAACCTTGCAATCTCACAAAAGATAAATGCTTCTTTCTTTGTACGAGAGATTCTTATCCTCACAACAGCAGGCGGGTATACTCCCCCACATTCTAATTAGACTGCT
Silene conica	1	mt	GCCTCGGATCAATTAGTGTGAATC	19-17	Silene_conica_mito_92	19017	A>G	AAATGCTTCTTTCTTTGTACGAGAGATTCTTATCCTCACAACAGCAGGCGGGTATACTCCCCCACATTCTAATTAGACTGCTACGGTTGTGATATATAAAGAGAAGAGAATAGGCACATGTGGAGCAGCCTTAGATAACTATTTCGAGGAAGATCTACAG
Silene conica	1	mt	GTGCCAGCAGATTAGGATGATTCA[R1]	19-11	Silene_conica_mito_92	19017	A>G	GCGATCCATACGAATATATAAAGAAAAGAGGGTGTATGCAACCTTGCAATCTCACAAAAGATAAATGCTTCTTTCTTTGTACGAGAGATTCTTATCCTCACAACAGCAGGCGGGTATACTCCCCCACATTCTA
Silene conica	3	mt	CCGCAAATACAGGGGGGGCTGCAA[R2]	24-17	Silene_conica_mito_92	19017	A>G	ACCTTGCAATCTCACAAAAGATAAATGCTTCTTTCTTTGTACGAGAGATTCTTATCCTCACAACAGCAGGCGGGTATACTCCCCCACATTCTAATTAGACTGCTACGGTTGTGATATATAAAGAGAAGAGAAT
Silene conica	1	mt	AGCCATCCGACGGGTAAAATTGGC	28-14	Silene_conica_mito_92	49721	A>G	ATGCGCGCCCCCATTTTTTAATGAGATCTCTAGACGTAGTGACCCTCTCATCATCACATACATACTACTTCTGTCTTTTCGAATAAAAGGATCTTTAACAAAAGAGGATCTCTCACATTTTCTTAGACTTCTTGATTCCGATGGATCCGCCAACGGGCTTAATGCTCGCTTTCCGGTGGGTTAACGCGGCTACTATGATTGGTAGGCTTT
Silene conica	1	cp	ACAAAGAATGATGAGCGTACAGAA	22-3	Silene_conica_mito_93	60303	C>G	TGGAACTTCTTACCACCTACCACCATATACTATATCCTTGAACTTTTTATCACCAGCTCACTTCTTATTCTTGGCTTATACCGGGGGTGGGCGCTCCTCTAACTCCAGTGGTGTCACGCTACTTGGGCGCTGCTTTGGTAAGGGCCCTTCAACTTCGGCGCCAGTACGCAGCACCCGCTTCTTCATCATGATCGCACATGCTTCGGTGTAGCGAGTTTCCTC
Silene conica	1	mt	ATGAATAGTACTGAAATCTGAGAT[R1]	25-22	Silene_conica_mito_94	11245	A>C	ACAAGCGTTACCAGCGCGTGTTTTTTCAAGGAGAGGTAGAACTCGATGCCTCACCAGTAACTACAGTAGAAAGAACTAGAAAAGGGCCCGATGCTCCAGTTCATCTTGGAACAAGACGGCCTGTTGGACTTAT
Silene conica	3	mt	AAAATAAAAAATGCGTACAAGACA	23-10	Silene_conica_mito_94	16585	A>G	CAAGTCTAAAGAAAAGATATTACAAGTCGATTAAGAAGAAAGCTTCCTCGTATCTACCGAAGGCTAGTCTACTAAGATGCTCCCTATTAAATCAGTGAGGCTTTGCTCCTTCCTTTTATAAAGTGGAAGTGAACCCCTTCCCCGAAAACTTCTGCAGGGACGAGTCCATAGGCGCTATATTGGAAAGAGCGACAAAACACTTCTTTATGGGGTTT
Silene conica	2	cp	ATTTGCAACACGTGACGAATCTGG[R2]	8-7	Silene_conica_mito_94	31037	A>G	GCGTTTAGTTTCTTTAAGTGGGTTGGGTGACAGACCGTCCATAGGAAGACTTCGGGAATTGTGGGCAAGAGATGTCTCTCATACGCCGCCCCTTTAAAATTGATGGAAGTCCCCGGCAGAGTGAAAGGGCCGT
Silene conica	2	cp	CTAATTCGACACTGCTAGACCGAG[R1]	8-6	Silene_conica_mito_94	32827	C>G	ACTTCAGTCTTTCCTTTATCCTCTCGTATGCACTCGTCCTCTCACCAAGGTCCGAGAACTTTCCTTCTCTTCTTTTCTTTATACCTCACGTGTTAAAGATCTAGACTTTTTCTCCTACGAGACCGAGGAACTG
Silene conica	1	cp	AGTTCTCACTAATCACGAACGTGC	14-13	Silene_conica_mito_95	4062	A>G	CTCCAGTTATAGCTACTTGACAAACAAAGCCTTACCCCGCTTCCATAGCGCCATATACATATAAAGATGGGGGAGGTAGGCAAAGAAAGTTAACTTCTTGGTTCTGATAATGCCCCTTTTGTACTAAAAGTTTCTCTGAAAT
Silene conica	3	cp	AAGGCATCGGGGGAGCCGGCGCTC[R2]	13-3	Silene_conica_mito_95	8021	A>G	AACTAAAGCTGCCACGCCCTATTCTACCAGGTCCCTTTAGTTGACAAAGCAGGAGGGTTGTTCTGATCATACCGCTCATACCGCGGCCTTTTGCTCTAACCTGCCCTAGCCCTCGGGGAGAACCTCTACTTTA
Silene conica	3	cp	GCGTACAACGGCTTTTTGCATGCA[R2]	17-12	Silene_conica_mito_95	8021	A>G	AAGCTGCCACGCCCTATTCTACCAGGTCCCTTTAGTTGACAAAGCAGGAGGGTTGTTCTGATCATACCGCTCATACCGCGGCCTTTTGCTCTAACCTGCCCTAGCCCTCGGGGAGAACCTCTACTTTAGTCCC
Silene conica	3	mt	CGGAATTTCTAAGGGCGCGCCGGG	26-16	Silene_conica_mito_95	8021	A>G	CCTAGCCCTCGGGGAGAACCTCTACTTTAGTCCCTTGCTTGCGTTTGTCAAAGAAATCACTCGGCCCGGAGAGGAAGGGGGGACTTAAGAGACTTTTTGTTGTATTGGAAAAAGGAGCAGCGTAATCTGAGAAGGTTGTCTTGTGGAAGAGACGGCT
Silene conica	2	cp	AAATCTCAGGTCTAAAAATATTGA	14-7	Silene_conica_mito_95	22253	A>G	CCCCAGTGAATCCACATACATAAAGAGCGCCTAATCTCAAGTGTCATCCCAAGCTTCCTCTTTTTAATTCAGGCACTTTTTTTCTACGCTTATCCTCCACTTTCCCCGCCGACGGGTGGGTGAGATCTGCAATGAGTACTGCTTGGGACCAGAGAAAGAG
Silene conica	3	cp	GCCCCCCTCATGTAGCTCTATAGG	13-8	Silene_conica_mito_95	22253	A>G	AGCTTCCTCTTTTTAATTATAGTAAACCCCAGTGAATCCACATACATAAAGAGCGCCTAATCTCAAGTGTCATCCCAAGCTTCCTCTTTTTAATTCAGGCACTTTTTTTCTACGCTTATCCTCCACTTTCCCCGCCGACGGGTGGGTGAGATCTGCAATGAGTACTGCTTGGGACCAGAGAAAGAGAAGAGAAGGAGGCTCG
Silene conica	3	mt	TCAGCACATAGATGATGCCTGACT[R2]	28-15	Silene_conica_mito_95	22253	A>G	CTAATCTCAAGTGTCATCCCAAGCTTCCTCTTTTTAATTCAGGCACTTTTTTTCTACGCTTATCCTCCACTTTCCCCGCCGACGGGTGGGTGAGATCTGCAATGAGTACTGCTTGGGACCAGAGAAAGAGAAG
Silene conica	1	cp	ATTAGCAAATGCGTTCGCGGACAA[R1]	32-20	Silene_conica_mito_96	11011	A>G	AAGAAAGAAACATTAGAAATCCTCATCACTAACGAAAGAGTACCACTTCAGGTAGAACAAGGCTACGCTCCTCTCACTAACGCGTTAACTCTCTTCACTCGTAAACTCTCCTTGGCGGGCTTGTGGGTGATCT
Silene conica	2	cp	AAACCGCTACAAACGCACATAATT[R1]	16-13	Silene_conica_mito_97	58533	A>G	CTCTTTTGGTACCTGCTTTTGCTTTCTTTTCTATCCTGGCGGCCCACTTCGCTCGTGGAACTGTTCCCAAAGGCATGCCCCCGGCTGGATTGATGCCTTGTCACTTTAATTGGCCTTTATTCTCGAATGAATT
Silene conica	3	mt	TAATCGCAATATTCCCACCACCAG[R2]	16-15	Silene_conica_mito_97	59611	A>G	CTTCGACAAAATGAAGGATCTTCCGCTCGGTACTATAAAGTTTTGTATACTTGTGAAGGCGATTCCTCACTGGCATTACTGGACTAGAGACTGGACTAGAGAATCAATCGACCCGTACTTAAAGAGTTTTGCG
Silene conica	3	mt	TAAAGCTAACTCTCCGAAAACTTG[R1]	21-6	Silene_conica_mito_98	30084	A>C	GAGCTGCCCCTTACTGGATCGGCAGCCTTTTCACTTGAATTATAACACAAGATATACCCACGGCTGTGTTTAGAGTTTTATGCAAGAGATAGAAGGTAGTGACATAAATACATAGGGAGTGATTAACAAGCTA
Silene conica	2	cp	TCACGGACACGCTCATTCACAAGA[R2]	16-11	Silene_conica_mito_99	5101	A>G	TCTTAGATAAGGTAAAGGAGCAAGCATGCCTCTTTGTCTGTATACTCTTCCATGTTGATTGCTCCCTCATTAGTAGTTTGGGATTTTATATTTGTGTTGTGAATCCGCCTTCTTGCTTGTGTTGTGAAGACGA
Silene conica	3	mt	GTCATTCGTTACTAACGTTACATT[R1]	19-12	Silene_conica_mito_99	29124	C>T	AACGAATTCCCTTTATATTATATATATAGAGAAAAGGGAGCGGGTAAGAGGGGGATAGCGCCCCATTCATCAATCCGCCCTACGGATTTAGATGCGATGTCTCCTGTTTTAAATCTTTGATAAGGTTGTTTCG
Silene conica	1	cp	ATACATTGAAGATCGGTTTTGCAC[R1]	21-11	Silene_conica_mito_frag2	7447	A>G	TTAGATGGTAGAAGGCTAGGAGAAAGCTTCCCGTTTTGATGGTGATCGAGTCCTAACTGATTAGCGTGGCACCATTCGCCCTATCCGTCTAAATTATATGGGGCTAGCAGACTTTATCTTGCGTTTTTCCGTG
Silene conica	1	mt	CACCCCCACCTTGGACTAGGCCAC[R2]	18-14	Silene_conica_mito_frag2	7447	A>G	CATGCCAGAGTGTTCTCTAGGATCAGAATGTTAGAGAAGTAGCAGCACCTGCCTTTTTTAGATGGTAGAAGGCTAGGAGAAAGCTTCCCGTTTTGATGGTGATCGAGTCCTAACTGATTAGCGTGGCACCATT
Silene conica	1	mt	CTGCGGACCTTATACAACCTAATT[R1]	17-16	Silene_conica_mito_frag2	7447	A>G	ATGCCAGAGTGTTCTCTAGGATCAGAATGTTAGAGAAGTAGCAGCACCTGCCTTTTTTAGATGGTAGAAGGCTAGGAGAAAGCTTCCCGTTTTGATGGTGATCGAGTCCTAACTGATTAGCGTGGCACCATTC
Silene conica	2	cp	CGTCCAGACCCCGTAAAATAGTAC[R1]	27-10	Silene_conica_mito_frag2	7447	A>G	CTAGGAGAAAGCTTCCCGTTTTGATGGTGATCGAGTCCTAACTGATTAGCGTGGCACCATTCGCCCTATCCGTCTAAATTATATGGGGCTAGCAGACTTTATCTTGCGTTTTTCCGTGAGGTATGTTGTCATT
Silene conica	3	cp	AACAAATGAGCTAATTCAACTCGG[R2]	20-10	Silene_conica_mito_frag2	7447	A>G	TTGAGAAAAACTTCATGCCAGAGTGTTCTCTAGGATCAGAATGTTAGAGAAGTAGCAGCACCTGCCTTTTTTAGATGGTAGAAGGCTAGGAGAAAGCTTCCCGTTTTGATGGTGATCGAGTCCTAACTGATTA
Silene conica	3	mt	CCGTTCGAATAAGACCTAATAATA[R1]	20-18	Silene_conica_mito_frag2	7447	A>G	TAGCAGCACCTGCCTTTTTTAGATGGTAGAAGGCTAGGAGAAAGCTTCCCGTTTTGATGGTGATCGAGTCCTAACTGATTAGCGTGGCACCATTCGCCCTATCCGTCTAAATTATATGGGGCTAGCAGACTTT
Silene conica	1	mt	CTAGCTCAAAAGGCGGCCAGTTAA	9-7	Silene_conica_mito_frag4	12866	C>T	AAGAGAGAAGTGAGAGGCAAAAGAAAGGAAATGGATTTTTCTAAAGGATTAACCTGCTGCCATTACATAGTTACGTTTGACTCTCCTTAATTCACAAGAAAAAAAGCAATCTCCAAGTAAGCTTGTAAGCTTTCCGAGGCAGGGGTGAGAAGGAAGCCTCGCGCGATCGGGCAGAAAGGGCTCCTTTGGTTGGAAGGGAATATCTTAGAGTAGAAGAGAGAG
Silene conica	2	cp	GGGGAGACTCAGTAACCACTACGA	14-11	Silene_conica_mito_frag4	18896	A>G	GATGCTAAGGTTCTTGCCCATTAACCCGTCAATGCATCTTCCTTAATCTAATGAAACGAGGGAGATCTCTTACTTCATCTGCTAGACACAAAGCACGCTTGCCTCATACGGCGGCACCACGCCCTAATAATA
Silene conica	3	cp	CGCTAGAGGATTTGCGTAATGTCC	13-8	Silene_conica_mito_frag4	18896	A>G	AGAAGGCTGGGATGCTAAGGTTCTTGCCCATTAACCCGTCAATGCATCTTCCTTAATCTAATGAAACGAGGGAGATCTCTTACTTCATCTGCTAGACACAAAGCACGCTTGCCTCATACGGCGGCACCACGCCCTAATAATAGGAAGAACGAAAAGTACATATACGACGTATATATCCGCATCTAGCTCAGAAGAGTCCCGTCGCCAACTTCCTACATATTGGATGGAACCTTTCC
Silene conica	2	cp	AACGTGGTAGGATTGTAAAAAACA	13-6	Silene_conica_mito_frag4	19605	A>G	CATTCCCTGGCGAGGGCCCGGTCGAAGAGATGCGATGATTTAAAGACCTGGCTACGGCATCATCATATGGACAAGCAGCAAAGGAGTAGTTAAAGCTTGCCTTCTGTTCCTTCCAGCTTTGTCGAGTTTGCTCGGGAGCGGAAGATGAAAGAGAATAAAAAACCAGTCCCAGGTAAAGTAGAGGGGTCCTTTCAGGAAAGACTTC
Silene conica	1	mt	CATTTTAACTATCGGCGAGAAAGA	21-18	Silene_conica_mito_frag7	111	C>T	TGCGTGTATCATGCCCGCGTAAACAAACTCCCCTCGCTCGCACCTTGCCCCGCTCGACTCCACGGACTCAGGCTTCATGACTTCCGGCTCTCCCCCGCTGGTTCTCTCGCTATGCTCGATCTCGTAAACTCTCCTTCGGGCTATCTCCTTCCCAGTCGCTACCACTTCGGGCTTATCTCCTCTCCTTGGCAGTCGATCCTCGTAACCTCTCCTCTCCCGTCGGTCGAGTCT
Silene conica	3	mt	GCAGCCTCGACTTCGCGATGACCC	36-19	Silene_conica_mito_frag7	164	A>C	GAAATCCGCACGTAGTGCGTGTATCATGCCCGCGTAAACAAACTCCCCTCGCTCGCACCTCGCCCCGCTCGACTCCACGGACTCAGGCTTCATGACTTCCGGCTCTCCCCCGCGGGTTCTCTCGCTATGCT
Silene conica	2	cp	AATACAAATTCGACCAAACACTTG[R1]	18-8	Silene_conica_mito_frag7	249	C>T	CTTCCGGCTCTCCCCCGCTGGTTCTCTCGCTATGCTCGATCTCGTAAACTCTCCTTCGGGCTATCTCCTTCCCAGTCGCTACCACTTCGGGCTTATCTCCTCTTCTTGGCAGTCGATCCTCGTAACCTCTCCT
Silene conica	3	cp	AACGCAACTAACTGGTGCATTGCC[R1]	11-5	Silene_conica_mito_frag7	502	A>G	ACCCATGAGGCCTAGATTCCGAGGATTTTCCGCAAAGAAAACCTCATTCCAGTGACAAAGACCTCCCCCTTAGGAAAGAAGCTTCAGCTTCATCAACAGCAAAAGAATCTGCATCAAAAAGTGTCTCAGAGGT
Silene conica	3	mt	CAAGTCAACATTGTTAATGCGAGA[R2]	19-17	Silene_conica_mito_frag7	1466	A>C	GAGCAAGGAAGCGATCAGGCAAGGAGGCACACCGCAGTCTTCGTTAGCGAAGGGAGACGAGATGACCCTCGAGGAGGTTGGCTTCGACTACGAAGGCTGAGCCGACTTGCAGTTATTTAAGCAAAAATACGGG
Silene conica	2	cp	AACAAAGTCGTTTAACTGCCATGT	15-6	Silene_conica_mito_frag7	1840	A>G	CTCCGAATTAATCTTAGGTGCATTCACGTCGTACATTTAGATTGCTACTTTATTCTTTTTTCCCGTGGGGTCGCGCCCGTTTCTGAGTCGCGCGCGCGCCATTATAGTACTCGCGCGCTGGCCCTTGATTTGTCTCTTTTCTTCATTTTTCCGACTCCG
Silene conica	3	cp	TGCCCAACCCAATTGCCATTGCAC[R1]	21-6	Silene_conica_mito_frag7	2672	A>G	CTCAGAGCACGCGCAGCCTTGCAAGCAAGCTCTTCCACTTCATGCTGCTGAGCCAATCTCCCTATCCTCTCACTACGATCGAGCCCCATTTCCCCCGTGTTTTTGACTCATTTGAAAACAGACCGCTCCCTCT
Silene conica	1	mt	AAAGACCAAACACTCAAGCGAATT[R1]	12-9	Silene_conica_mito_frag7	2769	C>T	CTAAATCGTTGCTCTTCTCCCGCCCACTATAGAATAGAGAAAATCTGCGCTCAAAAAAGTGATTTAATGATACCTATATAAGATAATTGGTCGGTTTCCTTCCAGTTTCTCACCAGATTTGTCGCCCTTAAAC
Silene latifolia	3	cp	AAGGTCTTATGAGAACAAGCATTC[R2]	11-4	Silene_latifolia_mito	6168	C>A	CAAGTACCGATATTGACGTTTTACCACCGATATTGACCAACTTTAAATATTTTAAATAAAAATAGGTAGACGACCAGTTCTTAAGAAGACCCTTGCTTTGGTTAAAACGAAGGAAGCACGTGATACGATTTCA
Silene latifolia	1	mt	ATTAGAGGTCTAGGTAGCAACCGA[R2]	16-9	Silene_latifolia_mito	7764	A>C	ATCAAAGAAGTCTTCTAGTGCCTTTCTTTCTAACAAAAGAAGGAGAATGTGTGCTTCATAGGGACATACCAGCTAAGGACCCGTTCCTCCGCTTTTTCCCATATCTAATCCTATGAATAAAGTGAAGTATCTG
Silene latifolia	1	mt	CTGTTCCTACCCTCCCGGGACCCA[R1]	23-17	Silene_latifolia_mito	12458	C>T	GAGTCACTTCGTACCTTTGCTAGATTTTTTCTGTCTTTCGGTTGTTTTACTTTTACGTAGGTGGGAATCCGCAGCGCGGATGGATTAAGAAGAAGAAAATCTTTACTTTACAATCAATAAAAGTCTCAATCAA
Silene latifolia	1	mt	TATCCCATAGACTGGTCGCCGTTA	17-17	Silene_latifolia_mito	13484	C>G	ATATTCCATTCCTTGAAAGCGAGTGAATACTAGAGCCAGTAAAACGGTAGCTACTAAAGCGTAAACTGCTCGTTTTTGCTTCCCCGCGAGTATAGCATGATGAGCCCAAGTTACGGCAGCTCCGGATGAAAGAAGAATAAGGGTATTAAGAAAAGGGATTTCCCAAGGATCTAAAACCCAAATCCCTTTTGGGGGCCAAATACCTCCGATCTCTACCGCAGGTGCC
Silene latifolia	3	mt	ATCCCTTATCCGGTCCTTCGCAAA	17-10	Silene_latifolia_mito	14096	C>T	CCCTAAAGTATAAAGAGGGGCTCTTTGGGCTCTTATTTTCTTTCTATCTGACAGGACAAAGAAATAGGAAGGGATGGTTCTTTCATTGCATTGATAGAAGTCTAACTAAAAAAAGATCTCTCTTGAGAAGAAAATCGTTGGTTTGACCGACGAACTACGTGGGAAAACTGATCTTCTTTCTTTGATTTTCAGCAAGCAAGTATTGGAAG
Silene latifolia	2	mt	TCCCAGGACGTATTTCCTGCTCCG[R1]	13-10	Silene_latifolia_mito	18250	C>T	TGACGAACGGAGTTTGCGGAGGGAGCAAAAAGAACGAATGGAACGTATGCCAGCCGAGTTGGCTGATGATGAAGAGAGTTCGCGAGCAGGAGAGGACACTGTACTTAAGCGGGTAGAATTTTTTTATACGTAG
Silene latifolia	1	cp	AGCTCACATGCCTTATACCTGATA[R2]	26-9	Silene_latifolia_mito	21260	C>T	AAGAGAATACCTGTGCGGATATATTCAGCTTTGGGTTGAAAGGTAAGGAATTTTACTCCGACTAAGATTATTGTCCATGGTGTAGTTGATAATAATAGGCACAGCCCAAATAACCCTCGGGTACAACATGCTA
Silene latifolia	3	cp	ACCTTCTCGGCCGTAAATTAATAT[R2]	11-9	Silene_latifolia_mito	24830	A>G	CTTGGCCTAAAAAGCATGGATTTCCCGCATCTGGGGGCATTGATCCGAAACTCGCCTACGGGCCTTGCGCTCTTTTTCTTTGTGTTCTTTTTGAATTAGACTCACACACCTAAGACTATGATCCTGGCTC
Silene latifolia	1	cp	CGCTCAAGTCACTGCAAACAACCA	14-11	Silene_latifolia_mito	29358	C>T	AAGACTAAGGCTGGCAAAAAAATAAGCAAAGCAAATAGGGATTTCTCTCTGCAGGATGAGTAAGCTAATAACCTCTTATATAGTCTTTCGCGTTTATCTTATATCCGAAGACATCTTTCCCTATGAAACTTCCTACTACGATAGCATCTGTTGACTTGTCATAACATAAGGCCTCTCTTCTGCTTTCTGAAACTCATAAAAAAGAAACCGAAGGCA
Silene latifolia	3	mt	ATTTTGTGCTATCAACCTTTTTGA	14-3	Silene_latifolia_mito	33866	C>T	AGAAAGAAACGGGATTCTATTCTTTCATTTTATTTAATAAGCGCCAGCCATAACATCTTTGAAACCTGGGACTAGCATCCTTGTTCATTATGAAAACTTGCTATTATATATGCTTCTGATTCAACCTCTGAGGAAGACTTTCGGGCATGAGACGTTCGTTCCC
Silene latifolia	3	mt	AGAGATACCATGCTAAAGCCGTAA	10-9	Silene_latifolia_mito	36963	C>T	AGTCTTCCGGCGACATGATTTCGATGCGCACTCGGAAACATAGTCTTGTAAGTTTGAATTTTTCTTAGGTCCGCCTTACAAGACTATGCTCGATGCGCTTAACGAAAGGGAACTCTCTAAATTCTTTCAGAATTTTCTTCGTAATTAAGCAG
Silene latifolia	1	mt	AGCAAGTTACTCCCAGGCGTGCAA	13-12	Silene_latifolia_mito	37264	C>T	GGACCGCCGACGAATAATAGGTACCCACACATTTGTAGCAAACTATGCAGAGTTAGTGAGCCGTGTAATAGGCGACCATTTCGCGCGGTTCGGGGGGCACTTGAGTCAGCCGCCGGCGCCCGACTGCGTCTTGACCCCTATCTAATTTTTGGGCCAATTCCCTCTTCGTACTACCAAAAAATGAGATTCTTGCCGA
Silene latifolia	3	mt	AGCAATTATCAGAGGCTAACGAAT[R1]	16-6	Silene_latifolia_mito	38019	C>T	AGATCATGACTTTACTAATAGAATATCAATCAAGGTTAGGGGGCTGAGAAGCTGTTGCTTGCTGCTTGCTGTCTACTTCGCGAGCCTTATGCGTTGTGCCCTGTTTTTTAACTTCCCTTTTTTCTTCCGTCCA
Silene latifolia	1	mt	AGGTCGCGTAAATGCCCGACCCAA	15-15	Silene_latifolia_mito	47341	C>T	TTTCATCATTCTCTTTTTTCATATATAAGATGATATTAGCTTTACAATAAGAATTTATGCTAGGGTAAACATACTTGACTAAGAGATCCATAACCAATATGGTTAGTAGGTCAAACTCGTTGATGAGGATATCCTCATTAAAGATCCGA
Silene latifolia	2	mt	AGAACACTAAGACGGAGAAGTATT[R1]	22-22	Silene_latifolia_mito	49911	C>G	TAACCTCGGTCTATGTAAACAAAGTTTTGTGTTTTTCATAACTTACCGCTTATGATAAATTTAATTGATTAAATTTCGTGCAAAAACAGAGGAGCGGAATACTGACTGATGGCATGATATTTCGTAGGTAGAC
Silene latifolia	2	mt	GACTATTAACAATGAAGGACATTA	27-24	Silene_latifolia_mito	72420	C>T	ACCCTTAGATATGCTTCTCTTACTTTTTCCCTAATATCATAAATATATAACTTTCTGCTTTTATAGTCCTGAACCCTCTCCCTATGTGAAGTGCCTAATTTCTTAGTAATAGATCCTATCCCCTTTCCTTTAGTCGAGAATAGGTTTCATACGAGGTAGGGCCTTCCAGACGCGCGAGGTAATGGGCACG
Silene latifolia	3	mt	AAGCCGAAGGAAGCATAGAACTTT[R1]	20-17	Silene_latifolia_mito	73432	A>T	CCCGGTATTTTCGGCATAAAACGGATTTGAGCTCATTTTCGAACAATTATACTAAGATAGCAAGTGCCATTTTAGGAGAGGTTTTATCCTTCATGAAAATAGCTGCTTCTGGCGAAAGACCCTTCCATTTCTA
Silene latifolia	2	mt	TAGACAAACTGGTTACGGAATGCA	10-4	Silene_latifolia_mito	74969	C>A	CCTTACCCATGAGGTTCCAACATTTTCTCCTTAATTTACCTAGGAGTTGTTCCCGTGCATCTTTAAAAAAGAGGTTATTATAAACTCTAAACCCATCCCTTGGAAAGAAAAAGGTAGCACCGAAGAAAGGAAAGAGC
Silene latifolia	1	mt	ACAGATAAAGGAATAAAGCGAGAG	13-8	Silene_latifolia_mito	77667	C>T	GTTTCTTTATCGCCAACATGATCCTTTCGAGCAGAGTCGAATGCAGGTTCATTTCAAACCAGTAAGCCAGCTTCAAATTATTTTTCTCACTCAGTCACTTGACCAGCTCACCTCTAAGTTCCCTTCGCTTGAGCTCTTGAAGCCAATT
Silene latifolia	1	mt	CCTCGACGCGCTTAAAGAATAAAG[R2]	15-15	Silene_latifolia_mito	78248	C>T	AGGCCAGGAAAAGAGGAAAAGAGAGTCTTGCTAGCCTTCATGCCGCGCTTCTGTTTGAGAATAGAATCCCGTGTGTGTCTTTCGCCCCAAGCATCAATTTGGAGATTATGCTTTGCTTTTTCTTTCGTGCATT
Silene latifolia	1	mt	AACCAAAAGCAACTATGACCGGGA[R1]	22-15	Silene_latifolia_mito	81857	C>T	GACGTACATTCAGTGGTTTAGGCCATAACCGTATATACTGTTGTCACGTCTCGACCCTAGTTCTGATTCCGCCTTTCTTTGTTCAACAGGGCTAACCCTGCCAGCTATTGGGCGAGAAAATGCGCCCGGGATG
Silene latifolia	3	cp	ATCTGCCTTGTATACTCGCCACTC[R1]	19-11	Silene_latifolia_mito	89073	C>T	TTGGTCTGTGCGCTTCTCTTATTACTTTTTTGTATTCTCCTGTTCTTTGGATACAATTTGATCCTTCTACGGCCAAATCTCAATTTGTCGAAAGCCTTCGATGGCTTCCTTATGAAAACATAAATTTTTATTT
Silene latifolia	3	cp	CATTACGAGAGCTATTCAATCTTT[R1]	11-7	Silene_latifolia_mito	90793	C>T	GTGGTCTAATGACAAGGGCCGACGACGAAAGCTCGGGACGGAGCCGTATGATGCGGAAGTCTCACGTACGGTTCCCTGAGAAGAGAGTGGCTACCTACTGGAGCTTCGACCAACCACAGATGGAAACTCTTAG
Silene latifolia	1	cp	AAAAAGCGTGAGTACTCTTCACCA[R1]	17-8	Silene_latifolia_mito	97681	C>G	ACCACAAGCAAGTGTTAACCACCAAGCGTTATTACCCACACATGTGGACAGCATTCGTTACCACCAATTCTTGTTGCCAAGCAATGAACACTAACTGAACAGCGCGTTTGCGCAAGCTATGTTGGTTGATGCG
Silene latifolia	3	mt	GCCAAAACAGCCTCCCGGAAAAAA[R1]	20-19	Silene_latifolia_mito	102692	A>T	TACCGAATGCTCATACGGGAAAGTGGACTCCTGGGTCAGGAACGAAGGAAGTCTCCGAGAAATCCTTTCTTTCTCGTCCACTCAGGGGGGTGCAGACACACCTGCGCGGATTACAGGTGACGGTTACAAGAAT
Silene latifolia	3	mt	AAGGCCGCAGGTCTTGAGATAGCT[R2]	23-15	Silene_latifolia_mito	109487	A>T	CAGATAGAGGGTTTGATTACCAAAACCTCGTGTTTTGGGCAGTAAATGCAAAAATAGCACATTTTTTAATTAATTGCTTAAGATACGAAGTCCCTTTTTTGCACCGAAAAATAATGACAGGTTCGAAACCTCG
Silene latifolia	3	mt	CGTATAACGCCAGGTGTAACGCCG	15-14	Silene_latifolia_mito	125646	C>T	CATCCAGCGTGTCGTCGTGGCGCCAACAGCCGTGTCCCGCTTCATGCTCTCCCCGCGCTCCGTTCCTTCGCTCGTCAACATGCTCTGCCCTCGTTCCTTTCCTCTGTCCAACCCACGTCTACTGAGGCTCATCCCCTTTCTTTCTCAGGAATCCTGGGCTCCGATCCTGGGCCCAAGCCCTCGCATATAAGAAGGAGACTCTCTACCAGAGGACAAGGGAATCATAAT
Silene latifolia	2	mt	AGCGTCATACAGCCCGCCGCTGGC	10-9	Silene_latifolia_mito	131847	A>T	AGAATATTGTTGTATGAACAGGTCTATTGGTTGGCTTTAGTAGCTGGAGCTGAAGCAAGCACTCTGCATACTGTATGAAAGAGTCATTCGACTAGACACGTCAGCTGGTGGATGTAGGATTTCATAGGAAGACCTGTGATTTAGAAGTGGTGAAGGTTGGTTATTGATAACAATAAGAGCCGTAT
Silene latifolia	1	mt	AGCAATTATAATTAAAACAAGCAT	21-15	Silene_latifolia_mito	143728	C>T	AAAGGATAACCTCAAAGTGAAAGACACAAAAATTTACGGGTTTGGAGCAACTTTTTCACGTGAAATCTCGTCGATCGAATTTCTTGCTTTTTTGAAAAACTAGTTTTCAATATCCAGCATTGGTTGAAACAGGTGCAGCGAGTGAAAGGAGCGAGTG
Silene latifolia	1	mt	ATCAGGCGGGCAGCATGAAAAATA	15-3	Silene_latifolia_mito	146258	C>A	GATCTCCACACATAACCGAGCAAGCTAAAGCTACCTCGAGCTGCAAGAGCCATATTCGTATTCGTATCAATCTTCAGAGGTTTCCCCAAGAAAGCCCCCCAATATGAATAGGAGATCCTCATCAA
Silene latifolia	2	mt	CACCATCCTGTAGTTAGCGATCCT	14-13	Silene_latifolia_mito	147589	C>T	GGGCTATGGTGGTAATACTCAAATTGAGTACAGAAAGCCGAAAATACCCTATACTTGTACAGGGCGTCAGACTATAGGCTCTCCAGGTAATCAATCTATGCTAAACCTCCCTGGTAAGGGAGAAGTCGCATGCATATAGGCTATCGG
Silene latifolia	1	cp	CGAACCAAATACCGAATGTCCGTC	15-12	Silene_latifolia_mito	159633	C>A	ATTTCCGACAGAAATAATCTCCATGCATGCCTTCTTTTTATTCTCCGCTCATAAGGTATTGAAACAGAAGAAACAGGCGAACATATCCAGTTGGGGACTCTAGTTTCCCCTGG
Silene latifolia	2	cp	CGCATCCTGAAACTAGCCCTGCAT[R2]	10-8	Silene_latifolia_mito	163156	C>A	TGTTTACTTGGGCGATATAGGAGATCAACAAGGATACTAGTGAAATAGACTAAGGAAGTAGGGCGATGACCTTATCTTTGCTGCAATTCACATATGAAATGGTGGAACAGGAAGATGCCTCTCATTTATCTTT
Silene latifolia	1	cp	CCGCTACCATTAGGATAATTCCTA	16-14	Silene_latifolia_mito	163441	C>T	TATGCCGTATCCATGCCCATTACTGCCTTTAAAAGTTTGGAGAACACACCCTGCTGAGGGACCTAACGAGGCATGGGTTTCACGCCCTTTCTTTCCTTACGCAAGCAGGCCTCTCTTGCCCAAACACTAGCG
Silene latifolia	1	mt	GCAATCTGCCCGTCATCCTAAGAT	11-6	Silene_latifolia_mito	168968	C>A	CCTCTGTTGTGTTGCTATAACCTAGTCTTACTCACTCTTACCTCCCTGCTTGTTTTCCTTTCTTTCTTATCAAATAAAATTAACATTAATAACTTTCTCTCCCCGATCTTATTAGCTTAGTAGCAGCAGTGGAAGTCACAGTAGTTGTAGCTGAGTAAGCTAGAGCCAAAAGCTT
Silene latifolia	2	mt	GATACGTGTCCTGTAACAAGAATT[R2]	16-14	Silene_latifolia_mito	171310	C>T	CTTTATTTTAGCTAAAAGAATGAGGTGAAATTCATCATGCTGTATTTTTAAAGACGAGATTTCCTGAAGAGTCGGCTTTTTGGTCCACGTTTTCCCTCTTTGAAGGGGAGTATTCTTCGAATTCCGACAAATC
Silene latifolia	1	cp	AATAGTACCACACGCCCTTACAGC	20-9	Silene_latifolia_mito	171654	C>T	TCCTATTTAAAAGGGAGATTTTCCAACAACATTGGGTGGGAAAACGATTTTCTTAGTAAAAAAATAAAAATTTTTTTAAAGAAAGCGGTGTTTTTGCTTACTAATGACTTTTTCTTAGTGAAACGAACTTTTCAAACGTGACTTTTTAAACAAACCCGCTATTTTTCGTCATTTGACGATTTTCTTAGTGATTTGGCC
Silene latifolia	2	cp	CCTCTGAAGCTCTTACTCGGTTAT[R1]	28-13	Silene_latifolia_mito	174322	A>C	CGAGAATTAAAAAGTTGGTAAAGACCCACCCCCTGTTTCAGGCAGAATGAGTCCCCGGGACCCCGGGACATTGGCTTCCGCCAACAGTGAACTATTAAGGATCGCATCCCGCGCATATTCTACATTATAGCCT
Silene latifolia	1	mt	ACAAAATTGATAACCAGCCAATTT	18-16	Silene_latifolia_mito	178439	C>T	TTCATGGGCGAGAAACTTTATCATTGCCCCTTTTCTTTTAGCGTAAGAAAATCCCTCGAAGAAGGCCTTAGTTTAGTCACACACCACTGTGGCCTGTCTTTACCACCTCTTTTTCCTCTTTTTGCGCACCCCTCTCTCTCCGGCGGAGACCTAAGG
Silene latifolia	3	mt	AAGCATACCGGGATCCCCTCCGTT[R1]	17-12	Silene_latifolia_mito	188034	A>C	TTTAGGTTTTTATTTCACGTGACATCCCCAAGTTACTCTTCTGAAAGCCATTCCTTCTTTGTCTCTTTTGTCCAGGAGTGAGTGCATGGATGCCTTTAATTTTTATTTAATTTTAATAAGGGGTTTGCCTTTG
Silene latifolia	2	cp	AGGCAAGATCGGTAACAAATGGCC[R2]	13-10	Silene_latifolia_mito	188035	C>T	ATGGATTTAGGTTTTTATTTCACGTGACATCCCCAAGTTACTCTTCTGAAAGCCATTCCTTCTTTGTCTCTTTTGTCCAGGAGTGAGTGCATTAATGCCTTTAATTTTTATTTAATTTTAATAAGGGGTTTGC
Silene latifolia	3	cp	AAGGAGTTTGGAGATGGCGTATGG	11-8	Silene_latifolia_mito	188728	A>T	AAGGCGATCGAAAGTAGCGAGCAGGAGTGTTAACGTTTAGTTCCTTAGCTTAAAGCTTAAGCTTATAGCTTATATTATAAAAGTTAAATTTAAATAAAGAAGTTAGCAGCAGGTGCTGGTAAAGGTACCTTTATTCTGAGACAGTCTAGAACCACGGGGAATGAACCACG
Silene latifolia	3	mt	CAGAAAAACCTCGACTCCAATTTA[R1]	15-8	Silene_latifolia_mito	191912	C>T	AAACACGATCGCCTACCAGTGGAAGGCTTTCTGCGTTCAGTCAATCTACGCAGAGTGAATCGGTCCCTAAGGAACCCCCGAAAGGGCTGCCGTCCGATGGGTACACGAAAGTGACGAAGTTGCTTTGACTACA
Silene latifolia	3	mt	CCCCGGTACCGACGGCAAGCTCGT	16-3	Silene_latifolia_mito	191930	C>T	TGACATGAGTAACGAGAAATCCTGTGAAAAACACGATCGCCTGCCAGTGGAAGGCTTTCTACGTTCAGTCAATCTACGCAGAGTGAATCGGTCCCTAAGGAACCCCCGAAAGGGCTGCCGTCCGATGGGTACACGAAAGTGACGAAGTTGCTTTGACTACAGAACCATGCCCTT
Silene latifolia	1	mt	ACCAGACCTTGAACGCAGCCACAC[R1]	22-9	Silene_latifolia_mito	196535	C>T	TGATAGCAATATGGGGGAAGTTCCCGTCAGGCAACAACGGTTCTGCCCGACCCTACAAAAGCATGCATATTATGTCAGTGAAGACTTGGTGTGAAGCCTTGGAGCTTACATTAGAAGTCGGAAGAATATGCCG
Silene latifolia	1	mt	GCCAGCCGTAGTTTAATTTGATGT[R2]	16-14	Silene_latifolia_mito	198536	C>T	GTTGGGTTGCTGGATACGGGATCCTTATAGTAGGCTGGGCCAAGATCCAGCCGAGAGAGGGCAGTCTTTAGAAGCAACAGGCTGGGAAAGCAAGAGAAGACTTTGTCTTTTCTTATCCTTTTCGCGCTTTCGC
Silene latifolia	1	cp	ATCACCAACTGCCACTCAATTTCA	15-12	Silene_latifolia_mito	202130	C>G	TATTCCTTCGACTGAGCACGTGGAATGAGATGCTTCAAGAAGGGCTTTTACTTCTCCTAGTGTTAAAGCCATGTTTCCATGTCCTTCTAATGGTAAGACCCACAGGAGGTTGTCCTCTCCTTTTTCAGTAAACAGAAGCCGTTGATGCGTACGTTTCATCCGCGAGCGGAAAGCTGACTCCTTGTTCTAAGACCCACAAGCGAGGAAGGGATTGGGGTTGGCATGTGATG
Silene latifolia	3	cp	AAAAATGCCGTGCGGTGGTCCCAT	10-6	Silene_latifolia_mito	213593	A>T	TTATTAAGTAGCATCCTAAGACTAAGCCTAGGAATATTAAGATGCGCTACGCTTGTTTATCAGCTCGTTCCTTAGACTCGTAGTTACCGGTCGGATCAGAGGAGTGACAACAGAATCCATAATCTCGATCGAGCCTTACTTAGCCCTATAAAAGCAGGCAAGACCTTGCCGCTTCTTTCTCTTCCGCC
Silene latifolia	3	mt	ATACACATACCATTAGCCACATAA[R1]	21-20	Silene_latifolia_mito	215891	A>G	ATAATAGGGCGAGAAGGCTGTTGCGAGCGAAATGCCCTTGTTAATTTTTTGTTCGAGTTCCAAAGGCCTACTCCGGGTGTTTCGTTTCAATCATCATGTACATATAGTATAATAAGAATTTGAGCTTGATCCT
Silene latifolia	1	mt	AGCTGCCAGATGCATTACCGACAC[R2]	23-14	Silene_latifolia_mito	217793	C>T	TTGGAATCGCTAGTAATCGCGGATCAGCATGCCGCGGTAAATATGTACCCGGGCCCTGTACACACCGCCCGTCACACCCTGGGAATAGGTTTCGCCCGAAGCATCGGACCAATGATCACCCATGACCTAATAT
Silene latifolia	1	mt	CCAGCGGCATTCCCGAAATTACAA[R2]	18-8	Silene_latifolia_mito	224402	C>T	TCCTTCCTTACAGAAATTATGACTACTAAACGATGACTCCTGGGGTGCCTTTGGACATAAGAAAAGTTGGTCTTCTGCTTCCTCTCTCCCAAAGCAAGGGCCACTCTCACGCGTGTTTGAGGATCGATAAGCG
Silene latifolia	1	mt	AAAATCCCGAGCTGTATTATTCGT[R1]	14-14	Silene_latifolia_mito	225073	A>G	CTTACTCTAAAGGATCGGGAGATTACGCAAAAGCAGATGTAGAATCGGCTGCTAGATCTGAACTTCCCGGAGATGACGTAACAGGAGACTTAGCTGGCTCGCCTGTCATATCTTAAGTTTCAATGGGCACCCT
Silene latifolia	1	mt	ATTTAAAATACGTTGCTAGGATGG[R1]	20-9	Silene_latifolia_mito	231137	C>A	TGCCTTGTTTCTTAGCCATTTGAGTGCCTCATAGGGGCACTCGCCCTTAACACTGCTGGCCTCCATTTCGGGTTTGGTTTATGGGCTGTGCCCCCAGTCAGTGTGTTTGCGGGTCTCAGCTGTGTCCCTAATT
Silene latifolia	1	mt	CGCCGTAACCTTTTTTACTTTATT[R2]	13-7	Silene_latifolia_mito	232768	C>T	CTTCTTCATGGTGAGCCAGTAGTATCCGGCTCTTAGTGCTTTGTGGGCCAGATTTCTGCCCCCAATGTGGTGTCCTCATATCCCTGAGTGGATGTCCGAGAGGACCTCTGCTGCCTCTACTGGGCTCAAGCAT
Silene latifolia	3	mt	CGGCGTATATCCTGACGCTTTGTG[R2]	9-7	Silene_latifolia_mito	237047	A>T	GGAGAGTAGTCTCACGTGCTTCCTGTGATCCATATTATAAAATTTATAGAAATTTAAATCTTAATTTAAAAAAAATAATTTATAGAAATTTAAATCTTAATTTAAAGAAAATAATTTAAAGAAATTTAAAGAA
Silene latifolia	1	mt	GTTCAACTTAATTCAGACACGACA[R2]	23-16	Silene_latifolia_mito	238334	C>T	GTTTTTTACGCCTGCATTCATTTCTTTTAATTTAAGTGTAAAACCCCCAAGCATACTATCAAACAAAGGTAAGGCATTTGGGCAGTCTTTTCGGACCAACGGGTTGGGATAAGGCAATGATATGGGCCAAGGG
Silene latifolia	2	mt	TCGACAGGCACGTGATCAGATAGT	18-17	Silene_latifolia_mito	250783	C>G	AAGAGCAATGAAATACTAGACCTTAGGGGAGAACGAACAAGCTTGTCCGTGGGTTCTCAATAGAGGAATCATGGAACACTTTCAATATTCGATTGAGGCGCGAAGCCCTTGCGACATATCTTCCGCCCGCTAACACACTACTGGCTACGTCTCTTCCTCTACCCGTTCATTTGGGTAAAAGATCTCTCTCCCTATAGGTCCTTTAAAAGATAAGATTTTCTCACAATTAAGGAT
Silene latifolia	3	mt	CTGTATTAAGACGGGGATTGACAA[R1]	17-9	Silene_latifolia_mito	252627	C>T	ACTTCACTCGCTCCAACCTAGCTTTTTAGTCAAGGGTAGGAAGTCAAAGCTTATGGGCTGCTTTTTTGCCATATCATATAACAAGGTATCACTGGCGCTTTCACCCCGATAAAGATCATATGAAAGTGCTTTT
Silene noctiflora	2	mt	AAACACGGTCCCTCAGCCGTAAAG[R2]	27-10	Silene_noctiflora_mito_1	61788	A>G	TAGTCCATCTTCTTGAAATCCGGTGTATCTATGATCAGTGCTTTGCTCCTCTCGTTCGGTCTCCTACACCCGAAGGTCTCAAAAGTCTTCCCATCCTGTTATTATTCTTACACTAAAGAAGCTTAGATTTTAA
Silene noctiflora	3	cp	AAAATACAGGGTCAAGTCAAATCA	9-8	Silene_noctiflora_mito_10	12029	C>G	AGAGCGTATAGGCCTTACAATCTATAAAGGGGATCTCATGTCAAAAGTCCCGCGGATCGTGCGGAAGACACAGCGCTCAGTCGGTGCTTACGGCGGCGAGACTGATCCTTACGTCTCTATCTTAGTCTAGAAAAGTCTTGCATTCTTATGATTGTGAGGCA
Silene noctiflora	3	mt	AAAAATTATATCCAAAAGACGACA[R2]	22-9	Silene_noctiflora_mito_10	68092	C>T	AATAAGGCTAATCTCAGAAAAAAGGAGGCTAGGGCAGCAGAATGGGGCTCGGTAGTGCGTTCCCAAGCAAAATCAAATGAGACTTTTGACCACTCACAAAAGAAAAAAAGGACCCACTCTTGGGAGAAGAGGT
Silene noctiflora	2	cp	ACGAAACTTCACCCAGTCCTGTAC	19-19	Silene_noctiflora_mito_10	79315	C>G	CTTATTCTTCCTTTACTTTAGTTCTGCTTTTAAGCCACGAGCATTCCCGCGAAAGTATAGAGTTTCTAGGGTACGACATTCACTCAGGAGCCTCGGGTTATAGCTTGGCTTCGATTGGACATGAGTGGTGATTAGTAAATAGTTCCCACTTCCTTCACCCTTGATTGATTTTTCTCTCTCTTCCGTAAGTCGACGCGCG
Silene noctiflora	2	mt	CACGCCGCAAAAGCCAGCGTGCTT[R2]	29-18	Silene_noctiflora_mito_11	13074	A>G	AGAGATCTTTCTTTTGTCCTCGATAAAGAGTTTTGTTATGACTTGGACTCTTGGGGAGCTCCCCCGGGAATGCCCTGCCTTTACTTTAGCAGGCTCGATCCTCGCACGCATATGCACATGGACTCAGCTCATG
Silene noctiflora	2	mt	GCATAACAAAACGGATGTCGCCCA[R1]	23-11	Silene_noctiflora_mito_11	130285	C>T	TGATCCTATAAAAAGAAAAGGAAGGAGGACGACATAAAAATAATGAAATTCCCGGTAAGCGAGGAAGAAAACAAAGAAAAAAGTAAAAGTAAACCTTTCCCACTTATTGAGTTACTTCGTTCCTTTGGACTCT
Silene noctiflora	2	cp	ATAAGACGCATTTGTAAAGCTATG	20-13	Silene_noctiflora_mito_12	38375	A>G	CCTATATATTAAATTAGAATAGACTTCTCCTTCTCTAGTTTAGCTTCCTTATCTTCATATAGAGCGATGCAGCACTCTTTTCGTTAAATTTTGGGATTGTGATGCCTCCGGAGCTGCGTTCCGAGAT
Silene noctiflora	3	mt	GACATGGAATTATGACCTCATGTT	17-13	Silene_noctiflora_mito_12	107033	A>G	GTAAAAGCAACTCAACTTTCTTTATGTTTATAAAGCTTGAACTTATGTGCTAAGGTTTTTTCTTGAGGTACTACTTATTCCTTACCTAAATCCAGTAACTAACGTAATCTCTCTTGTCGTAGCTGGAGCAAGAAAATCTATCTTATACCCAGTGGTCCGGAATTGGTACTTTCTCTGCTAATGCTAAAACTTCGGCTGCTTCTCTCCGGGATAGATTCCAAGAG
Silene noctiflora	2	cp	CCCCTCGAAAATGATCGTCCAATA[R1]	25-17	Silene_noctiflora_mito_13	113830	C>G	CTCTGGGATGTCGACATGCTCTAACGCGAGCTAGTTAGAAGGACCTTGTAAGGGCTATTGGCGCATGAAACATACTCTACAAGGAGCTTGCCTTGCTTCCTATATTTCTAGATTGTTGGGGCATTCTGTTTTA
Silene noctiflora	2	mt	AAAACTTGTAAGCCATTAGCGCCC[R1]	35-28	Silene_noctiflora_mito_19	11194	A>G	AGGTATGTACAGTGCATACCCCTTTTATCAATAAGAGGGCACCCCTCTTGATGTCTTATGCCCCGGGCCAGGCTCAGAGAAGAGCTAAGTTGCAAAGTTCATAGGGCCCATGAGAACTCAACCACACAA
Silene noctiflora	1	cp	CTGGTAAATAACGTATTGAAACTT[R2]	23-13	Silene_noctiflora_mito_20	20725	A>G	AAATCAAATAGTGTCCATCTTTCTTTATTATCAGCATCAAGAAGATATAGTCAAGTGTTTAACCTTAAGCTTGGTAGTAGGAGCCCCTTAATTAAGGTAGGGAGGCTATACAAAAAATGAATGGAAAGATTAC
Silene noctiflora	3	mt	GCCAAAACACAATAGAGGAGTGAG[R1]	14-14	Silene_noctiflora_mito_20	39620	C>T	AAGCTGTTCTCTTTGTTCCCGTTCCCTAAAAGCCGGTAACCCGCTCTCACTCACCCGCAGGCGGTGCTGGATAAAAAAGGTAGTCTCCCTTCTCTCCAATGATTTTTATGGATTGGAGTAACTAAAGCCACGG
Silene noctiflora	3	mt	ATCACACCCGATCACCAGTACCCA	7-5	Silene_noctiflora_mito_22	31499	A>G	TGAAACCATTTGACCCCAGTAAAGTGGGTACGGATGGGAATGACAACAAGGGTAAGGAGCTCCGCTCGGAAGCACATACGCACGGTTGTTCGAATGTCCGGTGAATACTAGCATGTGTAACAGGGTCCTTTTTTCCACGGGGCGAATCGACCGATCTTTCTATCAATCTATCAATAAAATATCCGTGAGGTACTAAATCGGCAAGCTT
Silene noctiflora	2	cp	AGCCTTACGAACCATAGTCAATCC	15-3	Silene_noctiflora_mito_23	102901	C>G	AATTCTCACCTACTTCTTTTCTACTGACGAACCTGGCTTATCTAAGTAAATCTTTATCCCGCCGCTTGGGGGATTTTTGTGCTAGAGTTGTAATAGCCTGCCTTTCTTTTCCTCGCGCATACGTTAGACTAAACTACCTCTCCCACTTCGGCTTATTAAGAGAATATGAAGTATTCCCCGTTGG
Silene noctiflora	1	mt	CGGCGTTCGACTTCAAAGCAGAAT	18-17	Silene_noctiflora_mito_23	106790	A>G	AATTAGAAGTTGAGATTCATTAAAAAGCGGTACCCTTTAACCTTCTTTCACCAGTAAGAGGCGGTTCGCCCTTGGAAGGTAGGCGGGGGTCCTCGTCCCACAGGAAATCCTAAGGCTTTTTAGAGGCTGCCCTGTGTGCTGATGCATATGTGAAGCTTTGGGGTGTTAACAGACGTAGTAGGTACTTAAATCATTA
Silene noctiflora	1	cp	AAGGCAAAAACAGCCCGCGTTCGC	14-12	Silene_noctiflora_mito_25	21097	C>G	AACTCGTTATGCTCTAATTCTTATTGTATGGAATTTCCAAAATACACTGACCCAGAACACTATGATTGGGGTAGTCGTCTCCTTCCAGTCTCACAGAGTCTGATGCCCCCAAATGAACTCGAGCTACAGATCCAGCACACTCCCCCTTCTTTAATTGGGTGAAT
Silene noctiflora	2	mt	CGGCAGGAGCGAGAGAAGGACTGA[R1]	16-11	Silene_noctiflora_mito_25	52824	C>T	CTGCATTTGTAAAGTTTAGATCATATAATAAAACCAAAGCTGCAGAATGCAGAAAAGGAAGTCTACCATAGACAAAGTAAAGTGAATATATATAAAGTGTGCAGAAAAGTGACCTCAGCTTTGTGCATCCGAT
Silene noctiflora	2	mt	GTTCAATCTCTGTGCCATCAAATC	23-19	Silene_noctiflora_mito_25	61211	C>T	AGGCAGTGAGACCCTCCTAGCTATAAGGCTATGTCCCCAAGCGTCAGAAACGGGCACCGAAAGATGTTAATCCGTCATCGGGGGAAACAGAGCATACTTACCAAAGCGAAAAAAGAAGGGTTGAGTCGGGCTCAAAAGACATGTTTTAGGACACAGAAGATGGGCACAAAAATAACGTTACACAAAAGTACTCAGCTATAATCGGGTGAAATAGCTAATACAAGAC
Silene noctiflora	3	cp	CACAGCAATTACGATGCATGGCAC	15-6	Silene_noctiflora_mito_25	69117	C>G	CTTTGGTGATACCCTTTTAATTCTTAAGTTTTAAAGCTTATTTCGCACTTTCCTCTAGAAAGAAAGGCTTGGGCTGGGTTTCGAAAAAAACGAAGGAAGGAGTCTGAATTCTATAATATAATAGAGACTTTGACTTTTCGGGTGGCTCACTCGCCTACTCTTTTTTATTTCATTACTGGTA
Silene noctiflora	2	cp	AACTACCAATAAGGGGTGCGAAAG[R2]	22-19	Silene_noctiflora_mito_27	9759	C>G	GTATAGAGTTTCCTCCTTAGTAATTGGTACGTCGATTAATGCAAGTAATAGGGGGGCGGCGAGCCCCTTATAGCACAACTCGAGAGGATCCCACTAAGGCTTTTCTCATAGCGCCCGCGTATATAAAAGGATT
Silene noctiflora	1	mt	ATTCAAGGTACAGATTTCCGAAAG[R2]	26-14	Silene_noctiflora_mito_27	21244	A>G	TGTTTACACCGATTCTATCTTCTCTAGCCGGGCTTTTCTCAAGAAAGTAGTCTGATCCCATATTAAGAAGTTCGTGCAGAAGAACGGCGGAGGTATACTTTTCTTGCTCTTTTCTCTTATCACCAAGTACTAA
Silene noctiflora	1	cp	CCACCACGATTGCTGATATAAGGA[R2]	15-8	Silene_noctiflora_mito_27	101273	C>G	TGGGGCTGTACCTAGTATACGTTAAGAAGCCCCCTCTCGTACTCCTTTCTCCCTTTTGTCGAGTCATGTTATAGCTTTGCAGCCGAGTCTTTTTGTTTTCCCTCATCCGCTAGAAGGCGACTTAACCAAAGAG
Silene noctiflora	3	mt	GATACAAGAAATTGTTTCGACCAG[R1]	14-7	Silene_noctiflora_mito_28	19819	A>C	GCCCTAGTAAACTAAGAGAGACGTGGCAGTTGTTTGATACCATTTTGAAGTTATCCGAAGCGGTTATTATCATTAAGTAGTATCGCGTGGTCTATAAGAGATAACAGCCAAGCCCCGTCGATCGGAAACTTAT
Silene noctiflora	3	mt	AAATGGAGTTAACATGTACGGAGT	24-17	Silene_noctiflora_mito_28	32049	C>A	AGCTGCCCCTGTAGACTAGAAAACACGCTGTCCTAGCATTAAAGGTAGGGGTTTTTTATCTTAACGCGGCACAAGTACTAAACTATTCATTAATGAAGGGCCAACAACTGCTTGTGTGAAGCAAGGAGGAAAGTTCGTCCATATAGCTGTTAAATTATAATAAGAAAGCTTAAGAACACATCCCTCTGACCTAGTGGTCATTGCAGGTAGGGCTTATTAATATACCG
Silene noctiflora	3	mt	ACCCGTACCGAATCCGGTTTTTAA[R1]	21-19	Silene_noctiflora_mito_28	35734	A>G	CATCTTTAAAGATCTGACTGAATTCAAAGAAAGTTTTACCACCTATATATAATAAGTAAAGCAAGCCATTGCTCTTTATCTTTAACAAGGGAAATTCCCCCTTAAGTAGAGCAATAAGTTAGTGATTGAGAAA
Silene noctiflora	3	mt	TATTGTGTGTTTTGTGTCACCTTA[R2]	16-15	Silene_noctiflora_mito_28	80457	A>G	TAGGTCAAAGGCGTTTGGAGAGAACCTTCTTTTTCTTTGTATTGGAACCCCCGTTCTCACAACCCGCTCAAGCATCAGGAACTGCCCCGCCGACTTCTTCTGTTTTGCTTCCAAAGTCTAGACATTCTTCTTA
Silene noctiflora	3	mt	ATGTAAAACGCTCAGCCTCCGGCA[R1]	17-15	Silene_noctiflora_mito_30	1614	C>A	TGCCCTCCCTTTATTTTATGTGTTTTTGTGCTTTCTCCTTCATCATTAGCTTAGCTTATGGTCTAAGAATCCTCTATTTAGTAGAATAAGTGCGCAAGATAGGGTGTTTACACCTCAACGGGAGAAGCTATTT
Silene noctiflora	1	cp	GACGCCTCACTATAAGCACGACAA	16-11	Silene_noctiflora_mito_30	31085	A>T	AGGAGAAGGAGATGGGGCCGCCTCAGTCTTGCTTAGTTCGATTCGGGATACGAGTTAGAAAAGCACTTTATTTATATCTCTGGCCCCCCTTCATCCAGCAGCAAAGCCCTCTTAAAAAAAAAAAAGCTTTCCTTGCCTTAATTGTTTTTCTTACTTATATGCGAGCCTGCTCGTTTTATACCTCTCGTTTACTATAG
Silene noctiflora	3	cp	CGGAGAATACTTTTAGTTAACGAA	12-3	Silene_noctiflora_mito_33	91267	A>G	GATCTGGTCAAATCTGTTTAGTGGCAGGGTAAGCTGCTGTACTGGAAAGAGCTTCAGTGGGCACTTCCGAAGCAGCCGTGCCCTACTTATGAGTCTAAGAAAAGGGGGTCTCTAGCACAGTAGTATATTCTTATCAAGAATTAATTTCAGAT
Silene noctiflora	1	mt	CTGGAGAAGTCTTCTAATTCTGGA[R1]	24-16	Silene_noctiflora_mito_34	94368	C>T	AGCTTAGGAATTTTGGTACCTAATTATAAAGGATTTGACGTCCCGAGGAAGAGTCCAACGAGGCTCACGGGCATCTTCAATCCTTCGATTGGATGAAAATAGTTTAGTAGTCTTGGCTTGACTTTTCTCTTAA
Silene noctiflora	3	cp	ACGAGCCACTACCTCAGCCCACGA[R1]	13-8	Silene_noctiflora_mito_36	21743	C>T	AAAGCTTTACTAGTAAGTTTTAGGAGAGTTTTCATATTTACGAACTCAGTATCCTATATGCTTGCCTTTCTTCAATTAAGTTACTAGCTCAATAAGAGGCCTATCCGAAACTTGTTATGCGGTATAAACGTGC
Silene noctiflora	1	cp	ATCGAGGAGGAAATTAAAACACAT[R1]	19-17	Silene_noctiflora_mito_37	98975	A>G	GTTGCTTAAGGTGTTCCGGCGAGGACAGCTATGAATAAGTGCTAAGGAGTTTAACTTTCCGTGGACTTTAGTAGAGGAAGCGCTTCTTGCCCTCTTTGGTATCTTACTCAAGGGTCTTACCCGGGCTTTAAGG
Silene noctiflora	1	mt	AAAGCGATGAGTGACGACAACGAC	25-10	Silene_noctiflora_mito_39	22334	C>T	TGTTGATGATCATTGTTATGAAACTAAATGAACCCTTTGTTTGGAACACACATTAGCAACGAAGTTCAGTCGTAGGTAGAGTGCACTTAACTTGTTTCGGGTATTCCACTCTGTAATGTAAAAGGGGAAGGAAGACCTTCTAACGCCAA
Silene noctiflora	2	mt	ATAAACTAAACGCCCTCCGAGCCC	20-12	Silene_noctiflora_mito_4	50747	A>G	GATTGATTGAACAGCTAAGCTTGGGATATGCGCTTTTACTGAAGGATCGGAATGAGCGAAAGAAAATTCAAATGCAAAACTGAAGCCTTTAAGTCAAGGGTCCTTGAATCGACCCCCCTAGGATTCCTTTACACTCTCTTGTTATCACTCTCGAGCAAGTAAACTCCCTTACT
Silene noctiflora	2	cp	CGTGTGGAGGCGGATCTGCCCGTG	16-14	Silene_noctiflora_mito_4	113747	C>G	TCAAAAAAAGAAATTTACTTTTCTTTTGCCAACGTGGTTCTCCAAAACCATACATACCTTCATTCTGAGCTTGAGGACTTTAATCATTGATGTCTCGAAAGAGAGGTAAGGCGCTAAGCATAGAACGATCCCCGTTCGGGCGGCAGCAGGGTTGGTTTTGACTGCTAGCGGTTCCGGGAAAGATAGCTTTTTTTCACCAAACTGGGGTATCTTCGTCATAAACCGATTT
Silene noctiflora	2	mt	ATGCCAGGTTGGCTGCTCCGGTAA	27-22	Silene_noctiflora_mito_40	57006	A>C	ATCTTGCATAGCTTTCTTGCGTGTGAGGGGCAGCTTAACCAAGTGAAGTACGCCTTTTGTTCACAGCTCTCTCTGTTTAAATAAAATATAAAAAGCTTTTCGTATACTTGTTTATGGCTAATTATTCCCCAAAAACTTAAGAATAAGTGTTATTTTAGCTTTCAAGCTT
Silene noctiflora	3	mt	CAGGGCAAAGAACCTCCGATACAC	22-15	Silene_noctiflora_mito_41	30542	C>T	CGATCTCCGCTTATTTACTATGCTAGCTTATTTGTTAGAATTAGAAATGTGTTTAAGTGAACGTGAGATTTAGCTCCTACCAAAAAGGCGCTGTTGTCGGGGACGATATACTTTCTTTGAATTGTTTAATGTTTACATTCGTATGAACCATTTAGCGTCTACCTTGATACATT
Silene noctiflora	2	cp	GGTTTAGCTCTTTAACACTATATC[R2]	13-13	Silene_noctiflora_mito_42	66528	C>T	TCATTTTATTCATTTGGCAAAGAGGGAAGACTTCTAGATAGCTCTTGGCGGAAGATCAGTCTATTATATCTTCTTTCCCAGTGCATAGCACTTTTTGTTTTAGTCAAGAAGCTTAAGATAGGTGACCCTTCGT
Silene noctiflora	3	cp	AACTAGACACCATCCCTTTATTCA[R2]	15-10	Silene_noctiflora_mito_42	76953	A>C	CATTTGGTCATCCGCCCGTGAAGAGGCGCGAAGCCCTTCTTTCTGTAACTGTAAACAGAATCCACGGGTTTCACCCAATAAGTGAGGCTAAAGATTGGTTATATAATTTTTTTCGGCATCGATTCCATCTTTT
Silene noctiflora	2	cp	CGAATAAAATAACTCACCAATCAT	25-4	Silene_noctiflora_mito_42	78622	C>G	CCCTTGGTTGCTTATGGCTTGTTTCCAAAGCTAGCTGAAGAAATAGATCCGACTATAAACCAGTAGGAGTTCGCATCTAATCCTATCTATTATTCTATTATAACAGGAATTCAAACAAGAAGTTAAAGAGGATTGGTTCACGCATCGTCATTCTTTTTTTCTT
Silene noctiflora	2	mt	ACGAAGCTGTAAAGAAACGCGCAT	23-23	Silene_noctiflora_mito_45	6428	C>T	CAGGCCGTCTTCCCATCCGATGAGATATGAGGAGGGGGAATCCTCAAACATTGGTAATTGTCACTTTCCCACCCTTAAACTCTGAATTTCTTTTTAGACAGAAGTTATTCGGAGAAGGAGGGCAGTATCCACCCTCTCCTTTACATGCAAAAGAGCTTTGCGACCCAGCCCAACTCCTATGCTT
Silene noctiflora	3	cp	AAATACTATGCGACTCGAACCAAG	8-4	Silene_noctiflora_mito_46	50562	C>G	GCTATAATATCTTTTCACTTACCGCGCTTTTCTAATCCTTGCTACCGAGGTCCTGTTAAAAAGATCCTGCTAACAAAGTGAGGAAGTACGCGGCCAAGCCTTGGCTTGGCTGACTTGGTCCAAAAACCCGAGCTACAAAATTAAATAAGAT
Silene noctiflora	2	mt	GGATTTAGTTCTTACACCGATGTC[R2]	24-19	Silene_noctiflora_mito_47	68200	A>G	TAACCACACTATCCTCCTTCTTCCCTTGTAAAGGGTTCCCGCCTAAATTTAATGTCTCATTATAACGAGAGGTGAGTGGGCGAAACCCTGTCTCATAGACGGATGGTTGCGTTAAATGTAAAGGCGCGAAACG
Silene noctiflora	3	mt	CCTGCTTGTAGCCGACCCTCTGAC	18-16	Silene_noctiflora_mito_48	24862	C>T	GCTTTGGTTTCACCCAAAGAATGAAGTTCAAAAAGGATGACTTTGAATTTAATTCCTATCTTAACAGTAAAATCAGAAGGCAATGCTCGCTTGATTCTTAAGTACGGATCCCTCAAGCTTTTTCTTGGAGTTTGACGCTTTGA
Silene noctiflora	3	cp	GAGCCGTACGTCGTTTACACGATT[R2]	13-8	Silene_noctiflora_mito_49	92734	A>G	GAAACTAGGCATAAAATGATTGATTCTCTTTCCTTTTTTATTATACCTTTTGCATTGCAAAGAAAGGGTAGGATTTACCGATCGTATCTCCCGCTGCTAATGTGTTAAGCAAAAATACCTTTAATTAAAAGGC
Silene noctiflora	3	cp	GTCTGATCGAATTCAATCAGGAAC	22-7	Silene_noctiflora_mito_51	29460	C>G	AATTAGTGTAGGCCTTCCTAAACCTAAAAGGCGAGACGAGAAAAGACCCTTTATTTATAACAAGACAAAAAGAAAGCAAAAAAAAGATGCCGGATCGACCGCTTTTCGGGCATATGCTTGGGTTGAGCACAGCGCGGATAGATAGACGACACTCTTGCTGATCAGACTGGTACCACTAGATTTCTTAGCTGTTACCATCTTATCTTGTAATGACCTTATCAGGCCTTGGCACCTTC
Silene noctiflora	2	mt	AACTCATGTAAGCAACCTGAGATC[R1]	31-26	Silene_noctiflora_mito_51	30792	A>G	CGATGGCTGCTCACAAGGAACCACGTGCCGGAACAGGCGAAGCGGGTGGACATACTCGAAGGAAAATAAAGGGCTTTGCCCATATATAAGGAGCAGTTGCAAGATAAAATTATTCCGTAAGACGTACTTACAG
Silene noctiflora	1	mt	CATTATATAACAGAGCCAGATTAA[R2]	23-14	Silene_noctiflora_mito_51	92067	A>C	GGACGCTTTCACTACTTTTGTAGCCTTTCGAATCCCGTGTCTTTCGGAAAGGACTTTTCTTCCCATCATCGGCTGCTTCCTCATCTGCCGCGTCTAGTGCATCTAGCCCCTGTTCTGTTTTAAATTCCTGTTC
Silene noctiflora	3	mt	AGATCTAGAATCGACATCGTTCCA	22-21	Silene_noctiflora_mito_53	2451	A>G	AAAGAGGGTTCTCGTGGGAGATGGAAAAAATGAAATGAGAAGCCTTTTCGTATATTTTGAGACAAGTGGGTTTGCTAAGTCAACTACATTAATATAATAATTGAACTTAATTCGATATGAGTTGTGATTCACGAAGGAGCTCTCTTGAAAAAAGAGGAAAGTAGTAAGCGAGGATCCTACTCTATTAAATTAAGTCAAGCTCGAGCGG
Silene noctiflora	1	cp	ATCAATCGCGAAGTGATTGAAAAG[R2]	22-18	Silene_noctiflora_mito_53	46531	C>G	ATAAAAGATCCATCCATGTAGGAAAAACGAAGTGGCATGATTTGATGCCGGTCATACCTGTTAAACCTTTCTCGACGCTTTCCTAGCCTTCCGTTGAAACGTAGACAGCCGACCTTCTAACCATCCGCATTCG
Silene noctiflora	1	mt	AGCAGGTTTTCAAGGACCGCAGCA	25-17	Silene_noctiflora_mito_55	5265	A>G	AAAGGGCTACCCCCCGCTTTCCCTCAGTAAGTATCGGCACTACGGGTATTTCCGGAAAAAGGAGTCAGTCGTATAAATACCCTTTGAATACGGGAGCAATTAGAAAGAGATGTAAAGGCTATCCATTCTATCCTATGCATGTGATCTTCTCTATCTGTCAACCAAGATGGAAAGCTCCGCTTGATTCTGGAATTTGGCATTCAAGGTTTCACATAAAGGATGATCTCAAGC
Silene noctiflora	1	cp	AAATAGGCACATGGTTCAATGACT[R1]	24-5	Silene_noctiflora_mito_57	3148	C>G	CTTTTTATTTAGTCAGGCAAATGGCATCACAGGCCAAAAAGAGCTGAAAAGACCATGAATTCATATTTCAGAAACGAGATTAATTGGCCGAAGCCCGAACGGTTGTTCTCATTGTTCAAGCATTGGCAGAGGA
Silene noctiflora	2	cp	ACGACTAAGTGACAAAGTCTTGGG[R2]	14-9	Silene_noctiflora_mito_58	19047	C>G	GAAGCCAGTTCATCCTCTTGATCCTATCCTTCTCGAACCTTACTTTCACATTTGACTAAGGAATGAATCTAAGCAAAATGACTCACAAGGTTCTAAGCCTACCTTTTGCATTGCTCTATTTGAGCCTTCAGAG
Silene noctiflora	3	mt	AACCAGAATTAACGTTCGGATGTC[R2]	20-11	Silene_noctiflora_mito_6	123449	C>T	AAAGGCTTACTTATCACATAACACCGAACAGTCCATATAACGGGCGGAAGTTTTTAGCCAGTGTGTTATCCACGCTTACCCGGAGGGGGGTGAAGTACAAATACCAGTCCACTTGAAAGCCTGGGCAAGGCGA
Silene noctiflora	1	mt	CACACTACAAGACGCGTGGAATCA[R1]	16-16	Silene_noctiflora_mito_7	136395	C>T	GGAGGAGACATCGAAGATGAAGCAAAAAATTCAAAGGCAAAGGAAGCAGATCCAAGTGAAAATGGTAAAGATGCCTCGACTGAGGAAGTAGTCGTTGCCACGTATGAGAAAGAGGCTGCTCCGGTACCTCAGG
Silene noctiflora	1	cp	TCCACACATATATTTTTAGAAATG	14-10	Silene_noctiflora_mito_8	803	A>C	TTCACTGTAATTCCTCCGGCTTCAATCGCCGAAACCAGCAAGCTTAGAGAACTATATGATTTTATTTCATTCTTACTCATCAGTCTCATTTTCTTATTAAGTGGTATTCTTTTTGAACACTTGTTAAGGCATAGCCACTCATTCTTACTCTCCTGCTTCGCTTGGTCTGGATCACTTCCTGCCTCTTCTTCCGCGAATTTTTTCTGGATA
Silene noctiflora	1	mt	ATGACTTAACTCCGTAATTTCCAC	14-8	Silene_noctiflora_mito_8	100937	A>C	AACAGGGCAAAGTGGGTCTAATTACTCGAGCAGAGTAATGAAAAGTCACAAACAGTCAGAGCATGTGAGGGCTCATATGGCATGGGTATCGAGTAAAAAATGCTTTTTTCAGGCTTACTTTTTAAACAGAATGAAAGGGTCGTGTAGACATGTCATAGCGATATGCGTTTCAACCGCGGGCAGCAGTTATCTCTCTCCAACAGGGT
Silene noctiflora	2	mt	ACAAAATTGTGCTTAATAAACAAT[R1]	38-9	Silene_noctiflora_mito_9	7249	A>G	ACTAGATTGCTAGCATAACAGCGGAGGATCAGACTAACTACCAAGTCCGGTCAGTACAAGTTGACAAGCCAAGTTTCTAAACCTTAGTTGACATTTGACTAATGATGGGATAATGGGGGCTATGAGAAATCTA

## Sheet: Excluded_SNVs
Species	Bio Rep	Library	Duplex UMI	SSCS Family Sizes	Reference Chromosome	Ref Position	Substitution Type	Filter	Read Sequence
Silene conica	2	cp	ATCTCCGTAATGCCCGACTAGCTT[R2]	8-8	Silene_conica_mito_1	122703	C>A	k-mer Count >= 10	AGTCTACGCCTTTTCCTCAACTTAGCAGCTGATTCTATTTTTCCTTGCCTTAGAGCCTTTAATGTCTCTATTCTCAGCCAGGATCAAACAAACTCAAGAAGGGTCTTTCTCTTTATTCTATCTTCTTTGCACT
Silene conica	3	mt	ACTCAAGATTCTGTATGCCAAGTT	24-13	Silene_conica_mito_10	17248	C>T	k-mer Count >= 10	CCTAATATTTAAAGTGCTATGAATCAAACTCCGCTCGGCTCAGAATAAAGCTCGGACGTCATCATTAGCCCCTGTCATAAGTAAGAAAGAGGCCTTACGTCTCAGTTGGTTGGTTATGAGAGGTCTTTTTGTTGCACTTTAGCGACTTGCCCACATTTCGGCCGAAGTCTTCATTCAATTCAAGCAGAAAGAAGGGCTT
Silene conica	2	cp	GTCTCGACTGACTAGGGATATTTT	13-7	Silene_conica_mito_10	28600	A>G	k-mer Count >= 10	TACTTACCATATGTCTCATCGTTCTTTAGATTTAATTCCAATACATATGGAGGATTTCCGAAGAGGTTCTATATGGGAGAGCGTTGAAGTACCGACCGCCGCTTGTCAACCTCTAGTCCTTTTTCTTTGTTTTGAGATAGCTCCACTCTTTGCTGGGAC
Silene conica	1	cp	CAAAACTAGAGACCTGCCCAATCC	20-16	Silene_conica_mito_10	81757	C>T	k-mer Count >= 10	GGCGTGTTTAAAGCGCTATCCCAAGCAGAATGAGGAAGGTCTGCGCAGTTACAAAACTTATTCCGTAAATGTTTGGAGGGGAGCCTAATCCTTTTACCTAAGAACACGAAAACAAGAATTTTAAAATGATTTATGGAAATTCTGCCTAAGCTCAGAATGTCAGACTATAAGGGCT
Silene conica	1	cp	CATGGGCGGGGCCGGTGCCCTGAA[R2]	29-17	Silene_conica_mito_10	81757	C>T	k-mer Count >= 10	AGCCTAATCCTTTTACCTAAGAACACGAAAACAAGAATTTTAAAATGATTTATGGAAATTCTGCCTAAGCTCAGAATGTCAGACTATAAGGGCTCATACAATATAACGCGAATTCCCCTCTTACATAGAGTTT
Silene conica	1	cp	CCGTCGCGTAGTGAAGAAAAACGA	18-9	Silene_conica_mito_10	81757	C>T	k-mer Count >= 10	CAGACAAGCATATAGAGCGGGAGAGAGGCGTGTTTAAAGCGCTATCCCAAGCAGAATGAGGAAGGTCTGCGCAGTTACAAAACTTATTCCGTAAATGTTTGGAGGGGAGCCTAATCCTTTTACCTAAGAACACGAAAACAAGAATTTTAAAATGATTTATGGAAATTCTGCCTAAGCTCAGAATGTCAGACTATAAGGGCTCATACAATATAACGCGAATTCCCCTCT
Silene conica	1	cp	CCTTTATTATTCCGCTGGAACTCG[R2]	30-17	Silene_conica_mito_10	81757	C>T	k-mer Count >= 10	ACAAAACTTATTCCGTAAATGTTTGGAGGGGAGCCTAATCCTTTTACCTAAGAACACGAAAACAAGAATTTTAAAATGATTTATGGAAATTCTGCCTAAGCTCAGAATGTCAGACTATAAGGGCTCATACAAT
Silene conica	1	cp	GAGCCAACACCGTAATATGTGATC[R2]	27-19	Silene_conica_mito_10	81757	C>T	k-mer Count >= 10	AGAATGAGGAAGGTCTGCGCAGTTACAAAACTTATTCCGTAAATGTTTGGAGGGGAGCCTAATCCTTTTACCTAAGAACACGAAAACAAGAATTTTAAAATGATTTATGGAAATTCTGCCTAAGCTCAGAATG
Silene conica	1	cp	CCTCTGGTTAATGCCCTAGAAGTA	36-22	Silene_conica_mito_10	81757	C>T	k-mer Count >= 10	AGGTAGCAGACAAGCATATAGAGCGGGAGAGAGGCGTGTTTAAAGCGCTATCCCAAGCAGAATGAGGAAGGTCTGCGCAGTTACAAAACTTATTCCGTAAATGTTTGGAGGGGAGCCTAATCCTTTTACCTAAGAACACGAAAACAAGAATTTTAAAATGATTTATGGAAATTCT
Silene conica	1	mt	AAGTGTAAATCAGTCACGGCAGGG[R1]	18-7	Silene_conica_mito_10	81757	C>T	k-mer Count >= 10	AAGGTCTGCGCAGTTACAAAACTTATTCCGTAAATGTTTGGAGGGGAGCCTAATCCTTTTACCTAAGAACACGAAAACAAGAATTTTAAAATGATTTATGGAAATTCTGCCTAAGCTCAGAATGTCAGACTAT
Silene conica	1	mt	AGTTATCCGGCGTGTCGCCCCTCC	29-16	Silene_conica_mito_10	81757	C>T	k-mer Count >= 10	TACCTAAGAACACGAAAACAAGAATTTTAAAATGATTTATGGAAATTCTGCCTAAGCTCAGAATGTCAGACTATAAGGGCTCATACAATATAACGCGAATTCCCCTCTTACATAGAGTTTACGCTTTTGAAAG
Silene conica	1	mt	CACGCACCAAATTCAGGCGATGTC[R1]	14-12	Silene_conica_mito_10	81757	C>T	k-mer Count >= 10	AAGCAGAATGAGGAAGGTCTGCGCAGTTACAAAACTTATTCCGTAAATGTTTGGAGGGGAGCCTAATCCTTTTACCTAAGAACACGAAAACAAGAATTTTAAAATGATTTATGGAAATTCTGCCTAAGCTCAG
Silene conica	1	mt	CCTTCCTGCTAGTCCCCAAACGCA[R2]	10-9	Silene_conica_mito_10	81757	C>T	k-mer Count >= 10	AATGAGGAAGGTCTGCGCAGTTACAAAACTTATTCCGTAAATGTTTGGAGGGGAGCCTAATCCTTTTACCTAAGAACACGAAAACAAGAATTTTAAAATGATTTATGGAAATTCTGCCTAAGCTCAGAATGTC
Silene conica	1	mt	GAAATTCCCCCTTCCCTAACAGAC[R2]	16-16	Silene_conica_mito_10	81757	C>T	k-mer Count >= 10	AGAATGAGGAAGGTCTGCGCAGTTACAAAACTTATTCCGTAAATGTTTGGAGGGGAGCCTAATCCTTTTACCTAAGAACACGAAAACAAGAATTTTAAAATGATTTATGGAAATTCTGCCTAAGCTCAGAATG
Silene conica	1	mt	AAATGGCAAAACGAGACGCGCGGG	17-9	Silene_conica_mito_10	81757	C>T	k-mer Count >= 10	TATCCCAAGCAGAATGAGGAAGGTCTGCGCAGTTACAAAACTTATTCCGTAAATGTTTGGAGGGGAGCCTAATCCTTTTACCTAAGAACACGAAAACAAGAATTTTAAAATGATTTATGGAAATTCTGCCTAAGCTCAGAATGTCAGACTATAAGGGCTCATACAATATAACGCGAATTCCCCTCTTACATA
Silene conica	1	mt	AACGACGGCTAGCTCCCCAACCCA	14-12	Silene_conica_mito_10	81757	C>T	k-mer Count >= 10	CTAATCCTTTTACCTAAGAACACGAAAACAAGAATTTTAAAATGATTTATGGAAATTCTGCCTAAGCTCAGAATGTCAGACTATAAGGGCTCATACAATATAACGCGAATTCCCCTCTTACATAGAGTTTACGCTTTTGAAAGATAAATTCCGCCCGCGGGGCTACTAATGGGAGAGGTAGGCCTA
Silene conica	1	mt	AACGATACAATAGCCGAAAGGTAG	14-14	Silene_conica_mito_10	81757	C>T	k-mer Count >= 10	GAGCCTAATCCTTTTACCTAAGAACACGAAAACAAGAATTTTAAAATGATTTATGGAAATTCTGCCTAAGCTCAGAATGTCAGACTATAAGGGCTCATACAATATAACGCGAATTCCCCTCTTACATAGAGTTTACGCTTTTGAAAGATAAATTCCGCCCGCGGGGC
Silene conica	1	mt	AAGGGCTAACCTGCGACTTCCGGA	15-9	Silene_conica_mito_10	81757	C>T	k-mer Count >= 10	AAGAACACGAAAACAAGAATTTTAAAATGATTTATGGAAATTCTGCCTAAGCTCAGAATGTCAGACTATAAGGGCTCATACAATATAACGCGAATTCCCCTCTTACATAGAGTTTACGCTTTTGAAAGATAAATTCCGCCCGCGGGGCTACTA
Silene conica	1	mt	CACGAATTGGAACGCGTGACGCAC[R2]	20-18	Silene_conica_mito_10	81757	C>T	k-mer Count >= 10	AGTTACAAAACTTATTCCGTAAATGTTTGGAGGGGAGCCTAATCCTTTTACCTAAGAACACGAAAACAAGAATTTTAAAATGATTTATGGAAATTCTGCCTAAGCTCAGAATGTCAGACTATAAGGGCTCATA
Silene conica	1	mt	CTACCTTTAACCTTGTGTCGGCCG	18-16	Silene_conica_mito_10	81757	C>T	k-mer Count >= 10	CCCTCTTAAACTACATGTTTTAAGTACTAGACCAGGTAGCAGACAAGCATATAGAGCGGGAGAGAGGCGTGTTTAAAGCGCTATCCCAAGCAGAATGAGGAAGGTCTGCGCAGTTACAAAACTTATTCCGTAAATGTTTGGAGGGGAGCCTAATCCTTTTACCTAAGAACACGAAAACAAGAATTTTAAAATGATTTATGGAAATTCTGCCTAAGCTCAGAATG
Silene conica	1	mt	CTCAATAATACGTTAAGAAATATA[R2]	21-21	Silene_conica_mito_10	81757	C>T	k-mer Count >= 10	GAGCCTAATCCTTTTACCTAAGAACACGAAAACAAGAATTTTAAAATGATTTATGGAAATTCTGCCTAAGCTCAGAATGTCAGACTATAAGGGCTCATACAATATAACGCGAATTCCCCTCTTACATAGAGTT
Silene conica	1	mt	GCAGATGCCTATTACATCCGCGAG	21-13	Silene_conica_mito_10	81757	C>T	k-mer Count >= 10	ACAAGAATTTTAAAATGATTTATGGAAATTCTGCCTAAGCTCAGAATGTCAGACTATAAGGGCTCATACAATATAACGCGAATTCCCCTCTTACATAGAGTTTACGCTTTTGAAAGATAAATTCCGCCCGCGGGGCTACTAATGGGAGAGGTAGGCCTAGTTTACTCACTGAAGTTACTCACATGGAATGCTCTGA
Silene conica	1	mt	GCATAGAAATATGGCCGAGCTAGA[R2]	27-13	Silene_conica_mito_10	81757	C>T	k-mer Count >= 10	GTAAATGTTTGGAGGGGAGCCTAATCCTTTTACCTAAGAACACGAAAACAAGAATTTTAAAATGATTTATGGAAATTCTGCCTAAGCTCAGAATGTCAGACTATAAGGGCTCATACAATATAACGCGAATTCC
Silene conica	1	mt	CATCAATTCCATTCACCTATACAA	17-11	Silene_conica_mito_10	81757	C>T	k-mer Count >= 10	TAGAGCGGGAGAGAGGCGTGTTTAAAGCGCTATCCCAAGCAGAATGAGGAAGGTCTGCGCAGTTACAAAACTTATTCCGTAAATGTTTGGAGGGGAGCCTAATCCTTTTACCTAAGAACACGAAAACAAGAATTTTAAAATGATTTATGGAAATTCTG
Silene conica	2	cp	AAGCTAACCCCAAGGAACCTGAAT	13-11	Silene_conica_mito_10	81757	C>T	k-mer Count >= 10	TGGAGGGGAGCCTAATCCTTTTACCTAAGAACACGAAAACAAGAATTTTAAAATGATTTATGGAAATTCTGCCTAAGCTCAGAATGTCAGACTATAAGGGCTCATACAATATAACGCGAATTCCCCTCTTACATAGAGTTTACGCTTTTGAAAGATAAATTCCGCCCGCGGGGCTACTAATGGGAGAG
Silene conica	2	cp	AATATTATCTAAGCCCCTTCAAAC	13-8	Silene_conica_mito_10	81757	C>T	k-mer Count >= 10	CCCCTGCCCGTAACCCTCTTAAACTACATGTTTTAAGTACTAGACCAGGTAGCAGACAAGCATATAGAGCGGGAGAGAGGCGTGTTTAAAGCGCTATCCCAAGCAGAATGAGGAAGGTCTGCGCAGTTACAAAACTTATTCCGTAAATGTTTGGAGGGGAGCCTAATCCTTTTACCTAAGAACACGAAAACAAGAATTTTAAAATGATTTATGGAAATTCTGCCTAAGCTCAG
Silene conica	2	cp	ACGTTCCAAAGTCTATGACGCCCG	14-8	Silene_conica_mito_10	81757	C>T	k-mer Count >= 10	AGAATGAGGAAGGTCTGCGCAGTTACAAAACTTATTCCGTAAATGTTTGGAGGGGAGCCTAATCCTTTTACCTAAGAACACGAAAACAAGAATTTTAAAATGATTTATGGAAATTCTGCCTAAGCTCAGAATGTCAGACTATAAGGGCTCATACAATATAACGCGAATTCCCCTCTTACATA
Silene conica	2	cp	GACGCTCAAACTTCGAGACCACTA[R2]	16-8	Silene_conica_mito_10	81757	C>T	k-mer Count >= 10	CACGAAAACAAGAATTTTAAAATGATTTATGGAAATTCTGCCTAAGCTCAGAATGTCAGACTATAAGGGCTCATACAATATAACGCGAATTCCCCTCTTACATAGAGTTTACGCTTTTGAAAGATAAATTCCG
Silene conica	2	cp	GACTGCAAATCATTATCCACATAG	15-11	Silene_conica_mito_10	81757	C>T	k-mer Count >= 10	AGGTAGCAGACAAGCATATAGAGCGGGAGAGAGGCGTGTTTAAAGCGCTATCCCAAGCAGAATGAGGAAGGTCTGCGCAGTTACAAAACTTATTCCGTAAATGTTTGGAGGGGAGCCTAATCCTTTTACCTAAGAACACGAAAACAAGAATTTTAAAATGATTTATGGAAATTCTGCCTAAGCTCAGAATG
Silene conica	2	cp	GAGGAAAGATCGGATCAACTAGTT[R1]	9-5	Silene_conica_mito_10	81757	C>T	k-mer Count >= 10	CCAAGCAGAATGAGGAAGGTCTGCGCAGTTACAAAACTTATTCCGTAAATGTTTGGAGGGGAGCCTAATCCTTTTACCTAAGAACACGAAAACAAGAATTTTAAAATGATTTATGGAAATTCTGCCTAAGCTC
Silene conica	2	cp	ACCTCGACCCACTTGAAAAGTGAC	10-8	Silene_conica_mito_10	81757	C>T	k-mer Count >= 10	AAGCATATAGAGCGGGAGAGAGGCGTGTTTAAAGCGCTATCCCAAGCAGAATGAGGAAGGTCTGCGCAGTTACAAAACTTATTCCGTAAATGTTTGGAGGGGAGCCTAATCCTTTTACCTAAGAACACGAAAACAAGAATTTTAAAATGATTTATGGAAATTCTGCCTAAGCTCAGAATGTCAGACTATAAG
Silene conica	2	cp	CATAACACTCCCGATTCAAACGCT[R1]	16-9	Silene_conica_mito_10	81757	C>T	k-mer Count >= 10	AGAATGAGGAAGGTCTGCGCAGTTACAAAACTTATTCCGTAAATGTTTGGAGGGGAGCCTAATCCTTTTACCTAAGAACACGAAAACAAGAATTTTAAAATGATTTATGGAAATTCTGCCTAAGCTCAGAATG
Silene conica	2	cp	CCCTGGCGAGACGAAACCAGCCAT	11-6	Silene_conica_mito_10	81757	C>T	k-mer Count >= 10	TGTTTGGAGGGGAGCCTAATCCTTTTACCTAAGAACACGAAAACAAGAATTTTAAAATGATTTATGGAAATTCTGCCTAAGCTCAGAATGTCAGACTATAAGGGCTCATACAATATAACGCGAATTCCCCTCTTACATAGAGTTTACGCTTTTGAAAGATAAATTCCGCCCGCGGGGCTACTAATGGGAGAGGTAGGCCT
Silene conica	2	cp	CGACAGGAACTAGCATCCCATTCT	14-10	Silene_conica_mito_10	81757	C>T	k-mer Count >= 10	CAGAATGAGGAAGGTCTGCGCAGTTACAAAACTTATTCCGTAAATGTTTGGAGGGGAGCCTAATCCTTTTACCTAAGAACACGAAAACAAGAATTTTAAAATGATTTATGGAAATTCTGCCTAAGCTCAGAATGTCAGACTATAAGGGCTCATACAATATAACGCGAATTCCCCTCTTACATAGAGTTTACGCTTTTG
Silene conica	3	cp	AATTACAACGACGTGTCGACGCGA	15-9	Silene_conica_mito_10	81757	C>T	k-mer Count >= 10	GTAAATGTTTGGAGGGGAGCCTAATCCTTTTACCTAAGAACACGAAAACAAGAATTTTAAAATGATTTATGGAAATTCTGCCTAAGCTCAGAATGTCAGACTATAAGGGCTCATACAATATAACGCGAATTCCCCTCTTACATAGAGTTTACGCTTTTGAAAGATAAATTCCGCCCGCGGGGCTAC
Silene conica	3	cp	AGTCATCGTAATGCGACAACAAAC	19-10	Silene_conica_mito_10	81757	C>T	k-mer Count >= 10	TGGAGGGGAGCCTAATCCTTTTACCTAAGAACACGAAAACAAGAATTTTAAAATGATTTATGGAAATTCTGCCTAAGCTCAGAATGTCAGACTATAAGGGCTCATACAATATAACGCGAATTCCCCTCTTACATAGAGTTTACGCTTTTGAAAGATAAATTCCGCCCGCGGGGCTACTAATGGGAGAGGTAGGCCT
Silene conica	3	cp	ATGGAAATAACTGTTCAAAGAGCT	9-5	Silene_conica_mito_10	81757	C>T	k-mer Count >= 10	GAGCCTAATCCTTTTACCTAAGAACACGAAAACAAGAATTTTAAAATGATTTATGGAAATTCTGCCTAAGCTCAGAATGTCAGACTATAAGGGCTCATACAATATAACGCGAATTCCCCTCTTACATAGAGTTTACGCTTTTGAAAGATAAATTCCGCCCGCGGGGCTACTAATGGGAGAGGTAG
Silene conica	3	cp	ACGGGCCACCGGCGAGAAAACAGA	8-7	Silene_conica_mito_10	81757	C>T	k-mer Count >= 10	CTAATCCTTTTACCTAAGAACACGAAAACAAGAATTTTAAAATGATTTATGGAAATTCTGCCTAAGCTCAGAATGTCAGACTATAAGGGCTCATACAATATAACGCGAATTCCCCTCTTACATAGAGTTTACGCTTTTGAAAGATAAATTCCGCCCGCGGGGCTACTAATGGGAGAGGTAGGCCTAGTTTACTCACTGAA
Silene conica	3	cp	CGCCGCATGTAACTCAGCCGAACG[R2]	14-9	Silene_conica_mito_10	81757	C>T	k-mer Count >= 10	GTTACAAAACTTATTCCGTAAATGTTTGGAGGGGAGCCTAATCCTTTTACCTAAGAACACGAAAACAAGAATTTTAAAATGATTTATGGAAATTCTGCCTAAGCTCAGAATGTCAGACTATAAGGGCTCATAC
Silene conica	3	mt	CAGGCCTCGCCACGACAATCAAAA[R2]	21-14	Silene_conica_mito_10	81757	C>T	k-mer Count >= 10	TTTAAAATGATTTATGGAAATTCTGCCTAAGCTCAGAATGTCAGACTATAAGGGCTCATACAATATAACGCGAATTCCCCTCTTACATAGAGTTTACGCTTTTGAAAGATAAATTCCGCCCGCGGGGCTACTA
Silene conica	3	mt	AAGCAATCAAGAGCGGGTGCCCCG	16-11	Silene_conica_mito_10	81757	C>T	k-mer Count >= 10	TTACAAAACTTATTCCGTAAATGTTTGGAGGGGAGCCTAATCCTTTTACCTAAGAACACGAAAACAAGAATTTTAAAATGATTTATGGAAATTCTGCCTAAGCTCAGAATGTCAGACTATAAGGGCTCATACAATATAACGCGAATTCCCCTCTTACATAGAGTTTACGCTTTTGAAAGATAAATTCCGCCCGCGGGGCTACTAATGGGAGAGGTAG
Silene conica	3	mt	AATAATATAATACGTGAGCAGCCA	14-11	Silene_conica_mito_10	81757	C>T	k-mer Count >= 10	GTTTGGAGGGGAGCCTAATCCTTTTACCTAAGAACACGAAAACAAGAATTTTAAAATGATTTATGGAAATTCTGCCTAAGCTCAGAATGTCAGACTATAAGGGCTCATACAATATAACGCGAATTCCCCTCTTACATAGAGTTTACGCTTTT
Silene conica	3	mt	ACTTACGAACATGGGTACTGCTCC	24-7	Silene_conica_mito_10	81757	C>T	k-mer Count >= 10	CACGAAAACAAGAATTTTAAAATGATTTATGGAAATTCTGCCTAAGCTCAGAATGTCAGACTATAAGGGCTCATACAATATAACGCGAATTCCCCTCTTACATAGAGTTTACGCTTTTGAAAGATAAATTCCGCCCGCGGGGCTACTAATGGGAGAG
Silene conica	3	mt	CGGCCATGGCTGGAAATTAGCCTG[R2]	22-11	Silene_conica_mito_10	81757	C>T	k-mer Count >= 10	GAATGAGGAAGGTCTGCGCAGTTACAAAACTTATTCCGTAAATGTTTGGAGGGGAGCCTAATCCTTTTACCTAAGAACACGAAAACAAGAATTTTAAAATGATTTATGGAAATTCTGCCTAAGCTCAGAATGT
Silene conica	3	mt	CTTTTGCGCTTATAGTGTAGAAAC[R2]	17-16	Silene_conica_mito_10	81757	C>T	k-mer Count >= 10	CCAAGCAGAATGAGGAAGGTCTGCGCAGTTACAAAACTTATTCCGTAAATGTTTGGAGGGGAGCCTAATCCTTTTACCTAAGAACACGAAAACAAGAATTTTAAAATGATTTATGGAAATTCTGCCTAAGCTC
Silene conica	3	mt	GCTAAACATTACTGATCGGACAGA[R1]	20-5	Silene_conica_mito_10	81757	C>T	k-mer Count >= 10	AGGGGAGCCTAATCCTTTTACCTAAGAACACGAAAACAAGAATTTTAAAATGATTTATGGAAATTCTGCCTAAGCTCAGAATGTCAGACTATAAGGGCTCATACAATATAACGCGAATTCCCCTCTTACATAG
Silene conica	3	mt	AAAATACATATTTAACACTATCGA[R1]	26-12	Silene_conica_mito_10	81757	C>T	k-mer Count >= 10	ACAAGAATTTTAAAATGATTTATGGAAATTCTGCCTAAGCTCAGAATGTCAGACTATAAGGGCTCATACAATATAACGCGAATTCCCCTCTTACATAGAGTTTACGCTTTTGAAAGATAAATTCCGCCCGCGG
Silene conica	3	mt	AAACTAAAAATCCGTTTCCCAAGT	23-15	Silene_conica_mito_10	81757	C>T	k-mer Count >= 10	CTTATTCCGTAAATGTTTGGAGGGGAGCCTAATCCTTTTACCTAAGAACACGAAAACAAGAATTTTAAAATGATTTATGGAAATTCTGCCTAAGCTCAGAATGTCAGACTATAAGGGCTCATACAATATAACGCGAATTCCCCTCTTA
Silene conica	3	mt	ACGTGGCTCGTTTGTGGCTTCAGG	17-16	Silene_conica_mito_10	81757	C>T	k-mer Count >= 10	AAAGCGCTATCCCAAGCAGAATGAGGAAGGTCTGCGCAGTTACAAAACTTATTCCGTAAATGTTTGGAGGGGAGCCTAATCCTTTTACCTAAGAACACGAAAACAAGAATTTTAAAATGATTTATGGAAATTCTGCCTAAGCTCAGAATGTCAGACT
Silene conica	3	mt	ACGTGGTAGAAACGACGTGCTCCT[R1]	19-11	Silene_conica_mito_10	81757	C>T	k-mer Count >= 10	CTAAGAACACGAAAACAAGAATTTTAAAATGATTTATGGAAATTCTGCCTAAGCTCAGAATGTCAGACTATAAGGGCTCATACAATATAACGCGAATTCCCCTCTTACATAGAGTTTACGCTTTTGAAAGATA
Silene conica	3	mt	AGGACAAATCATCTAAGAAAACTG	22-17	Silene_conica_mito_10	81757	C>T	k-mer Count >= 10	ACACGAAAACAAGAATTTTAAAATGATTTATGGAAATTCTGCCTAAGCTCAGAATGTCAGACTATAAGGGCTCATACAATATAACGCGAATTCCCCTCTTACATAGAGTTTACGCTTTTGAAAGATAAATT
Silene conica	3	mt	AGTGAGAAGTTAGGAAAGATCACA	17-8	Silene_conica_mito_10	81757	C>T	k-mer Count >= 10	AAGGTCTGCGCAGTTACAAAACTTATTCCGTAAATGTTTGGAGGGGAGCCTAATCCTTTTACCTAAGAACACGAAAACAAGAATTTTAAAATGATTTATGGAAATTCTGCCTAAGCTCAGAATGTCAGACTATAAGGGCTCATACAATATAACG
Silene conica	3	mt	GCAAACAATATCGGTCGTTAAACA	16-12	Silene_conica_mito_10	81757	C>T	k-mer Count >= 10	AGAATTTTAAAATGATTTATGGAAATTCTGCCTAAGCTCAGAATGTCAGACTATAAGGGCTCATACAATATAACGCGAATTCCCCTCTTACATAGAGTTTACGCTTTTGAAAGATAAATTCCGCCCGCGGGGCTACTAATGGGAGAGGTAGGCC
Silene conica	1	mt	CAACCTGTCAAAGAGGCCCATCAC[R2]	20-15	Silene_conica_mito_10	82112	A>G	k-mer Count >= 10	GAGCCCTTTATCTCCCCCCTCCCCTCTTGCTTTGCTCGAGTCTTTCATTCCTGGCGGTCAAGCTCTAAACACTTGGTACCTCTCATTGCGCAAACTAAACGCATCCCTTCCCTTTTCGATCTAGAGAATTATA
Silene conica	1	mt	AAGAGAGTGCTAACTGAAACCTCG	17-10	Silene_conica_mito_10	82112	A>G	k-mer Count >= 10	TTTCTCTTCTTCCTCGAGCCCTTTATCTCCCCCCTCCCCTCTTGCTTTGCTCGAGTCTTTCATTCCTGGCGGTCAAGCTCTAAACACTTGGTACCTCTCATTGCGCAAACTAAACGCATCCCTTCCCTTTTCGATCTAGAGAATTATACAA
Silene conica	1	mt	ATAGCCCAGAGCTATTTACTTGAA[R1]	21-6	Silene_conica_mito_10	82112	A>G	k-mer Count >= 10	CATTTGCCGCTCCTATCCTTTACAGCCTTCGTTTCTCTTCTTCCTCGAGCCCTTTATCTCCCCCCTCCCCTCTTGCTTTGCTCGAGTCTTTCATTCCTGGCGGTCAAGCTCTAAACACTTGGTACCTCTCATT
Silene conica	1	mt	ATGGGCGATACGTTTCCAAACTTC[R1]	24-13	Silene_conica_mito_10	82112	A>G	k-mer Count >= 10	GCCATTTGCCGCTCCTATCCTTTACAGCCTTCGTTTCTCTTCTTCCTCGAGCCCTTTATCTCCCCCCTCCCCTCTTGCTTTGCTCGAGTCTTTCATTCCTGGCGGTCAAGCTCTAAACACTTGGTACCTCTCA
Silene conica	1	mt	CAGCGCGTTGGTTGATCCCGAGGG	14-11	Silene_conica_mito_10	82112	A>G	k-mer Count >= 10	CTATCCTTTACAGCCTTCGTTTCTCTTCTTCCTCGAGCCCTTTATCTCCCCCCTCCCCTCTTGCTTTGCTCGAGTCTTTCATTCCTGGCGGTCAAGCTCTAAACACTTGGTACCTCTCATTGCGCAAACTAAACGCATCCCTTCCCTT
Silene conica	1	mt	GATCCGAAAATTGCCTAGACCCAA[R2]	30-8	Silene_conica_mito_10	82112	A>G	k-mer Count >= 10	TCGTTTCTCTTCTTCCTCGAGCCCTTTATCTCCCCCCTCCCCTCTTGCTTTGCTCGAGTCTTTCATTCCTGGCGGTCAAGCTCTAAACACTTGGTACCTCTCATTGCGCAAACTAAACGCATCCCTTCCCTTT
Silene conica	1	mt	GATAATCGTGATGATCCTGGGTGC[R1]	16-11	Silene_conica_mito_10	82112	A>G	k-mer Count >= 10	CCTTTATCTCCCCCCTCCCCTCTTGCTTTGCTCGAGTCTTTCATTCCTGGCGGTCAAGCTCTAAACACTTGGTACCTCTCATTGCGCAAACTAAACGCATCCCTTCCCTTTTCGATCTAGAGAATTATACAAC
Silene conica	2	cp	AACTAGTAATCCATGCAAGAACCT	18-17	Silene_conica_mito_10	82112	A>G	k-mer Count >= 10	CCCTTTATCTCCCCCCTCCCCTCTTGCTTTGCTCGAGTCTTTCATTCCTGGCGGTCAAGCTCTAAACACTTGGTACCTCTCATTGCGCAAACTAAACGCATCCCTTCCCTTTTCGATCTAGAGAATTATACAACTAACTGTCTGGCGCAGAATGACTACAAGATCAAAGCATCTCTATACCACATTTAACGAGTTAAGACAAGCGAGGA
Silene conica	2	cp	AGCCGGCATACGCATAACTATTGC	17-4	Silene_conica_mito_10	82112	A>G	k-mer Count >= 10	TGCCGCTCCTATCCTTTACAGCCTTCGTTTCTCTTCTTCCTCGAGCCCTTTATCTCCCCCCTCCCCTCTTGCTTTGCTCGAGTCTTTCATTCCTGGCGGTCAAGCTCTAAACACTTGGTACCTCTCATTGCGCAAACTAAACGCATCCCTTCCCTTTTCGA
Silene conica	2	cp	ACTTACAATTATATGAAAATGTAA	11-4	Silene_conica_mito_10	82112	A>G	k-mer Count >= 10	CCTATCCTTTACAGCCTTCGTTTCTCTTCTTCCTCGAGCCCTTTATCTCCCCCCTCCCCTCTTGCTTTGCTCGAGTCTTTCATTCCTGGCGGTCAAGCTCTAAACACTTGGTACCTCTCATTGCGCAAACTAAACGCATCCCT
Silene conica	3	cp	CCTCATCACTTAGAGATCTACCAA[R1]	13-6	Silene_conica_mito_10	82112	A>G	k-mer Count >= 10	AAAGGGTGCCATTTGCCGCTCCTATCCTTTACAGCCTTCGTTTCTCTTCTTCCTCGAGCCCTTTATCTCCCCCCTCCCCTCTTGCTTTGCTCGAGTCTTTCATTCCTGGCGGTCAAGCTCTAAACACTTGGTA
Silene conica	3	mt	ATCTAGCCCCCATCCGCACGTAGC	17-8	Silene_conica_mito_10	82112	A>G	k-mer Count >= 10	TTTCTCTTCTTCCTCGAGCCCTTTATCTCCCCCCTCCCCTCTTGCTTTGCTCGAGTCTTTCATTCCTGGCGGTCAAGCTCTAAACACTTGGTACCTCTCATTGCGCAAACTAAACGCATCCCTTCCCTTTTCGATCT
Silene conica	3	mt	CCAGACTCGCGTGCTGGTAGTGTA	17-11	Silene_conica_mito_10	82112	A>G	k-mer Count >= 10	CGTTTCTCTTCTTCCTCGAGCCCTTTATCTCCCCCCTCCCCTCTTGCTTTGCTCGAGTCTTTCATTCCTGGCGGTCAAGCTCTAAACACTTGGTACCTCTCATTGCGCAAACTAAACGCATCCCTTCCCTTTTCGATCTAGAGAATTATACAACTAACTGTCTGGCGCAGAATG
Silene conica	3	mt	AAATCGCTAATATCCCGTTGATGA[R1]	19-17	Silene_conica_mito_10	82112	A>G	k-mer Count >= 10	TATCTCCCCCCTCCCCTCTTGCTTTGCTCGAGTCTTTCATTCCTGGCGGTCAAGCTCTAAACACTTGGTACCTCTCATTGCGCAAACTAAACGCATCCCTTCCCTTTTCGATCTAGAGAATTATACAACTAAC
Silene conica	3	mt	GAATCACCCGAGGGCCCTCTGGAC[R1]	18-9	Silene_conica_mito_10	82112	A>G	k-mer Count >= 10	CCTTTATCTCCCCCCTCCCCTCTTGCTTTGCTCGAGTCTTTCATTCCTGGCGGTCAAGCTCTAAACACTTGGTACCTCTCATTGCGCAAACTAAACGCATCCCTTCCCTTTTCGATCTAGAGAATTATACAAC
Silene conica	1	cp	CCGCGCGTGGCTGAATGCTTTCAA	27-23	Silene_conica_mito_101	4959	C>T	k-mer Count >= 10	CCATTAAAACAGTAGCTACTAAAGCGAAAACTGCGCGTTTTGACTTCCCCGCGAGTATCGCATGATGAGCCCATGTTACGGCTGCTCCGGATGAGAGAAGAATCATTGTATTGAGAAAAGGTATTTCCCAAGGATCTAAAACTAGAAGGCCTT
Silene conica	1	cp	ACTGGACGGAAACAGCCACAAAGA	27-27	Silene_conica_mito_101	4959	C>T	k-mer Count >= 10	GCCATTAAAACAGTAGCTACTAAAGCGAAAACTGCGCGTTTTGACTTCCCCGCGAGTATCGCATGATGAGCCCATGTTACGGCTGCTCCGGATGAGAGAAGAATCATTGTATTGAGAAAAGGTATTTCCCAAGGATCTAAAACTAGAAGGCCTTTAGGCGGCCAAATACCTCCTATCTCTACTGCGGGCGCCAAAGAAGAAT
Silene conica	1	cp	GGCTCGGATACAGTCTGCAAGTGC[R1]	29-23	Silene_conica_mito_101	4959	C>T	k-mer Count >= 10	CTGCGCGTTTTGACTTCCCCGCGAGTATCGCATGATGAGCCCATGTTACGGCTGCTCCGGATGAGAGAAGAATCATTGTATTGAGAAAAGGTATTTCCCAAGGATCTAAAACTAGAAGGCCTTTAGGCGGCCA
Silene conica	1	mt	CAGGGCGCGAGGCCATCTACCAAG	17-17	Silene_conica_mito_101	4959	C>T	k-mer Count >= 10	CGCTTGGAAATACTCCATTCCTTGAAATCCGGTGAAGACTAAAGCCATTAAAACAGTAGCTACTAAAGCGAAAACTGCGCGTTTTGACTTCCCCGCGAGTATCGCATGATGAGCCCATGTTACGGCTGCTCCGGATGAGAGAAGAATCATTGTATTGA
Silene conica	1	mt	AAGCACTAGTAAGCCTCTATACCT	19-18	Silene_conica_mito_101	4959	C>T	k-mer Count >= 10	AAAACTGCGCGTTTTGACTTCCCCGCGAGTATCGCATGATGAGCCCATGTTACGGCTGCTCCGGATGAGAGAAGAATCATTGTATTGAGAAAAGGTATTTCCCAAGGATCTAAAACTAGAAGGCCTTTAGGCGGCCAAATACCTCCTATCTCTA
Silene conica	1	mt	ACTACTCATTTGTCGTGTGCACAT[R2]	23-19	Silene_conica_mito_101	4959	C>T	k-mer Count >= 10	AGCTACTAAAGCGAAAACTGCGCGTTTTGACTTCCCCGCGAGTATCGCATGATGAGCCCATGTTACGGCTGCTCCGGATGAGAGAAGAATCATTGTATTGAGAAAAGGTATTTCCCAAGGATCTAAAACTAGA
Silene conica	1	mt	GAACTTGCCATTTTCGATGGATCT[R1]	20-17	Silene_conica_mito_101	4959	C>T	k-mer Count >= 10	CTACTAAAGCGAAAACTGCGCGTTTTGACTTCCCCGCGAGTATCGCATGATGAGCCCATGTTACGGCTGCTCCGGATGAGAGAAGAATCATTGTATTGAGAAAAGGTATTTCCCAAGGATCTAAAACTAGAAG
Silene conica	1	mt	GACGAAAGACGTTACAAAACGACC[R2]	21-17	Silene_conica_mito_101	4959	C>T	k-mer Count >= 10	GGAAATACTCCATTCCTTGAAATCCGGTGAAGACTAAAGCCATTAAAACAGTAGCTACTAAAGCGAAAACTGCGCGTTTTGACTTCCCCGCGAGTATCGCATGATGAGCCCATGTTACGGCTGCTCCGGATGA
Silene conica	1	mt	GCGTGAAACGTGTGCCTGAATTGC	17-16	Silene_conica_mito_101	4959	C>T	k-mer Count >= 10	CGAAAACTGCGCGTTTTGACTTCCCCGCGAGTATCGCATGATGAGCCCATGTTACGGCTGCTCCGGATGAGAGAAGAATCATTGTATTGAGAAAAGGTATTTCCCAAGGATCTAAAACTAGAAGGCCTTTAGGC
Silene conica	1	mt	GAAACAAAGCACGCGAACGCAATC	16-13	Silene_conica_mito_101	4959	C>T	k-mer Count >= 10	TGCTAAGAAAAAGGTCGAACCATAAATGCTATCCGAAATAGTGAAGGGCGCTTGGAAATACTCCATTCCTTGAAATCCGGTGAAGACTAAAGCCATTAAAACAGTAGCTACTAAAGCGAAAACTGCGCGTTTTGACTTCCCCGCGAGTATCGCATGATGAGCCCATGTTACGGCTGCTCCGGAT
Silene conica	2	cp	ACAGATGCGGACCGAGATCCAACT[R1]	23-12	Silene_conica_mito_101	4959	C>T	k-mer Count >= 10	GAGTATCGCATGATGAGCCCATGTTACGGCTGCTCCGGATGAGAGAAGAATCATTGTATTGAGAAAAGGTATTTCCCAAGGATCTAAAACTAGAAGGCCTTTAGGCGGCCAAATACCTCCTATCTCTACTGCG
Silene conica	2	cp	AACGCCTCGAACCATCTAACCCGA[R2]	11-5	Silene_conica_mito_101	4959	C>T	k-mer Count >= 10	ATACTCCATTCCTTGAAATCCGGTGAAGACTAAAGCCATTAAAACAGTAGCTACTAAAGCGAAAACTGCGCGTTTTGACTTCCCCGCGAGTATCGCATGATGAGCCCATGTTACGGCTGCTCCGGATGAGAGA
Silene conica	2	cp	CCCATCCAGGCTGGGAGAGAAAAA	17-16	Silene_conica_mito_101	4959	C>T	k-mer Count >= 10	AAGCCATGAAAGCCTGTTGCTAAGAAAAAGGTCGAACCATAAATGCTATCCGAAATAGTGAAGGGCGCTTGGAAATACTCCATTCCTTGAAATCCGGTGAAGACTAAAGCCATTAAAACAGTAGCTACTAAAGCGAAAACTGCGCGTTTTGACTTCCCCGCGAGTATCGCATGATGAGCCCATGTTACGGCTGCTCCGGATGAGAGAAGAATCATTGTATTGAGAAAAG
Silene conica	3	cp	AAAAACAAAACCCATCAAACATCC	11-11	Silene_conica_mito_101	4959	C>T	k-mer Count >= 10	AAGCCATGAAAGCCTGTTGCTAAGAAAAAGGTCGAACCATAAATGCTATCCGAAATAGTGAAGGGCGCTTGGAAATACTCCATTCCTTGAAATCCGGTGAAGACTAAAGCCATTAAAACAGTAGCTACTAAAGCGAAAACTGCGCGTTTTGACTTCCCCGCGAGTATCGCATGATGAGCCCATGTTACGGCTGCTCCGGATGAGA
Silene conica	3	cp	ATCACAAAACCATCAGTCACTTAG[R2]	10-8	Silene_conica_mito_101	4959	C>T	k-mer Count >= 10	CTACTAAAGCGAAAACTGCGCGTTTTGACTTCCCCGCGAGTATCGCATGATGAGCCCATGTTACGGCTGCTCCGGATGAGAGAAGAATCATTGTATTGAGAAAAGGTATTTCCCAAGGATCTAAAACTAGAAG
Silene conica	3	cp	CAATCACAATACTACTCGTCGCAA	14-14	Silene_conica_mito_101	4959	C>T	k-mer Count >= 10	CGAAATAGTGAAGGGCGCTTGGAAATACTCCATTCCTTGAAATCCGGTGAAGACTAAAGCCATTAAAACAGTAGCTACTAAAGCGAAAACTGCGCGTTTTGACTTCCCCGCGAGTATCGCATGATGAGCCCATGTTACGGCTGCTCCGGATGAGAGAAGAATCATTG
Silene conica	3	cp	CACACATGGCCCCACTCTAAAACG	19-9	Silene_conica_mito_101	4959	C>T	k-mer Count >= 10	CGCTTGGAAATACTCCATTCCTTGAAATCCGGTGAAGACTAAAGCCATTAAAACAGTAGCTACTAAAGCGAAAACTGCGCGTTTTGACTTCCCCGCGAGTATCGCATGATGAGCCCATGTTACGGCTGCTCCGGATGAGAGAAGAATCATTGTATTGAGAA
Silene conica	3	mt	AATAAAAATAATTGAACGAATGGA	20-17	Silene_conica_mito_101	4959	C>T	k-mer Count >= 10	CATGATGAGCCCATGTTACGGCTGCTCCGGATGAGAGAAGAATCATTGTATTGAGAAAAGGTATTTCCCAAGGATCTAAAACTAGAAGGCCTTTAGGCGGCCAAATACCTCCTATCTCTACTGCGGGCGCCAAAGAAGAATGAAAAAAAGCCCAAAAAAAGGCAAAAAAGAACATAACTTCAGAGACGATGAACAAAAGAAAGCCATATCG
Silene conica	3	mt	ATCGCCGGCCCCTTGTCCTTCTGA[R1]	25-23	Silene_conica_mito_101	4959	C>T	k-mer Count >= 10	AAAACAGTAGCTACTAAAGCGAAAACTGCGCGTTTTGACTTCCCCGCGAGTATCGCATGATGAGCCCATGTTACGGCTGCTCCGGATGAGAGAAGAATCATTGTATTGAGAAAAGGTATTTCCCAAGGATCTA
Silene conica	3	mt	CGTCCAACATCTGTTGACTTAGGA[R2]	17-5	Silene_conica_mito_101	4959	C>T	k-mer Count >= 10	TGGAAATACTCCATTCCTTGAAATCCGGTGAAGACTAAAGCCATTAAAACAGTAGCTACTAAAGCGAAAACTGCGCGTTTTGACTTCCCCGCGAGTATCGCATGATGAGCCCATGTTACGGCTGCTCCGGATG
Silene conica	3	mt	CTAAGATGTTAATTAACCACTACC	27-26	Silene_conica_mito_101	4959	C>T	k-mer Count >= 10	AAAGGTCGAACCATAAATGCTATCCGAAATAGTGAAGGGCGCTTGGAAATACTCCATTCCTTGAAATCCGGTGAAGACTAAAGCCATTAAAACAGTAGCTACTAAAGCGAAAACTGCGCGTTTTGACTTCCCCGCGAGTATCGCATGATGAGCCCATGTTACGGCTGCTCCGGATGAGA
Silene conica	3	mt	GCCGGACCTGTGTGCTGGCGGAAA	21-13	Silene_conica_mito_101	4959	C>T	k-mer Count >= 10	GAAAGCCTGTTGCTAAGAAAAAGGTCGAACCATAAATGCTATCCGAAATAGTGAAGGGCGCTTGGAAATACTCCATTCCTTGAAATCCGGTGAAGACTAAAGCCATTAAAACAGTAGCTACTAAAGCGAAAACTGCGCGTTTTGACTTCCCCGCGAGTATCGCATGATGAGCCCATGTTACGGCTGCT
Silene conica	1	cp	CAGTACCCCCACGCAAAGCTGCGT[R2]	7-6	Silene_conica_mito_101	5557	A>G	No k-mer coverage for reference allele	AACCAGGACCCGCATATAAAAAAGTCAAGGCAAAGGACTAATCTCGTCTACTAACTAAATGACTAAAAGAGAGAACTTCTCTTATTATTCTAAAGTCTTTTCAACCCTTATCCTCTCGCTACGGGAAATCGAC
Silene conica	1	cp	GCCTTCTCCCTTTAATCTAACGAA	33-18	Silene_conica_mito_101	5557	A>G	No k-mer coverage for reference allele	CATATAAAAAAGTCAAGGCAAAGGACTAATCTCGTCTACTAACTAAATGACTAAAAGAGAGAACTTCTCTTATTATTCTAAAGTCTTTTCAACCCTTATCCTCTCGCTACGGGAAATCGACCCCCTTTCTCCCACTTCGTGTCCTTTCGCTTTGGTCGAGCCCAACCAACCAGTCCTCCTCCTTTTTTCGTCACAAAATGAAGAAGCA
Silene conica	1	cp	AAGTGACTAAATTAACCAGTGCGA[R2]	25-24	Silene_conica_mito_101	5557	A>G	No k-mer coverage for reference allele	AACCCTTATCCTCTCGCTACGGGAAATCGACCCCCTTTCTCCCACTTCGTGTCCTTTCGCTTTGGTCGAGCCCAACCAACCAGTCCTCCTCCTTTTTTCGTCACAAAATGAAGAAGCAGAAGTAGGACCAAAC
Silene conica	1	mt	AGATATTAATAGGGTTTTCTAATC[R1]	11-11	Silene_conica_mito_101	5557	A>G	No k-mer coverage for reference allele	CCTCTCGCTACGGGAAATCGACCCCCTTTCTCCCACTTCGTGTCCTTTCGCTTTGGTCGAGCCCAACCAACCAGTCCTCCTCCTTTTTTCGTCACAAAATGAAGAAGCAGAAGTAGGACCAAACTGAGAGTAA
Silene conica	1	mt	CGCGCCCCCCCTTTCTCGTCCTTT[R1]	19-6	Silene_conica_mito_101	5557	A>G	No k-mer coverage for reference allele	CCTTATCCTCTCGCTACGGGAAATCGACCCCCTTTCTCCCACTTCGTGTCCTTTCGCTTTGGTCGAGCCCAACCAACCAGTCCTCCTCCTTTTTTCGTCACAAAATGAAGAAGCAGAAGTAGGACCAAACTGA
Silene conica	1	mt	AACCATCAGTCGAGGTGACATCAA[R1]	23-6	Silene_conica_mito_101	5557	A>G	No k-mer coverage for reference allele	AAAGTCTTTTCAACCCTTATCCTCTCGCTACGGGAAATCGACCCCCTTTCTCCCACTTCGTGTCCTTTCGCTTTGGTCGAGCCCAACCAACCAGTCCTCCTCCTTTTTTCGTCACAAAATGAAGAAGCAGAAG
Silene conica	1	mt	ACCAAGGCGCGGGGTTTCCGGCGC[R2]	25-13	Silene_conica_mito_101	5557	A>G	No k-mer coverage for reference allele	GCATATAAAAAAGTCAAGGCAAAGGACTAATCTCGTCTACTAACTAAATGACTAAAAGAGAGAACTTCTCTTATTATTCTAAAGTCTTTTCAACCCTTATCCTCTCGCTACGGGAAATCGACCCCCTTTCTCC
Silene conica	1	mt	ACGTAACTCTATGCAGGACGTTCA[R1]	23-15	Silene_conica_mito_101	5557	A>G	No k-mer coverage for reference allele	TCGTCTACTAACTAAATGACTAAAAGAGAGAACTTCTCTTATTATTCTAAAGTCTTTTCAACCCTTATCCTCTCGCTACGGGAAATCGACCCCCTTTCTCCCACTTCGTGTCCTTTCGCTTTGGTCGAGCCCA
Silene conica	1	mt	AGATCCTAACCCGCAGGATGCTGT	28-15	Silene_conica_mito_101	5557	A>G	No k-mer coverage for reference allele	TTATTCTAAAGTCTTTTCAACCCTTATCCTCTCGCTACGGGAAATCGACCCCCTTTCTCCCACTTCGTGTCCTTTCGCTTTGGTCGAGCCCAACCAACCAGTCCTCCTCCTTTTTTCGTCACAAAATGAAGAAGCAGAAGTAGGACCAAACTGAGAGTAAGCAGCATAAA
Silene conica	1	mt	CAAGAACAAGCCCTATGCGAATAG[R1]	21-17	Silene_conica_mito_101	5557	A>G	No k-mer coverage for reference allele	AGTCTTTTCAACCCTTATCCTCTCGCTACGGGAAATCGACCCCCTTTCTCCCACTTCGTGTCCTTTCGCTTTGGTCGAGCCCAACCAACCAGTCCTCCTCCTTTTTTCGTCACAAAATGAAGAAGCAGAAGTA
Silene conica	1	mt	CATACCTACAACGAGTCATAACAA[R1]	24-19	Silene_conica_mito_101	5557	A>G	No k-mer coverage for reference allele	TTCAACCCTTATCCTCTCGCTACGGGAAATCGACCCCCTTTCTCCCACTTCGTGTCCTTTCGCTTTGGTCGAGCCCAACCAACCAGTCCTCCTCCTTTTTTCGTCACAAAATGAAGAAGCAGAAGTAGGACCA
Silene conica	1	mt	CCGGAAACCTACGGGGCATCAAGA	23-17	Silene_conica_mito_101	5557	A>G	No k-mer coverage for reference allele	AAAAGAGAGAACTTCTCTTATTATTCTAAAGTCTTTTCAACCCTTATCCTCTCGCTACGGGAAATCGACCCCCTTTCTCCCACTTCGTGTCCTTTCGCTTTGGTCGAGCCCAACCAACCAGTCCTCCTCCTTTTTTCGTCACAAAATGAAGAAGCAGAAGTAGGAC
Silene conica	1	mt	CTCTCCCTTGTGTCCGCCCCATCA	18-9	Silene_conica_mito_101	5557	A>G	No k-mer coverage for reference allele	AAAGTCTTTTCAACCCTTATCCTCTCGCTACGGGAAATCGACCCCCTTTCTCCCACTTCGTGTCCTTTCGCTTTGGTCGAGCCCAACCAACCAGTCCTCCTCCTTTTTTCGTCACAAAATGAAGAAGCAGAAGTAGGACCAAACTGAGAGTAAGCAGCATAAACAAGTAGGTGGTCTTTGTGAATGAGAAATAAAAGCTTTGTAGTTTCAGAGGAATCC
Silene conica	1	mt	CTTAAAAAATAAGTAGCGTCGGAT	19-18	Silene_conica_mito_101	5557	A>G	No k-mer coverage for reference allele	AAGAGAGAACTTCTCTTATTATTCTAAAGTCTTTTCAACCCTTATCCTCTCGCTACGGGAAATCGACCCCCTTTCTCCCACTTCGTGTCCTTTCGCTTTGGTCGAGCCCAACCAACCAGTCCTCCTCCTTTTTTCGTCACAAAATGAAGAAGCAGAAGTAGGACCAAACTGAGAGTAAGCAGCATAAACAAGTAGGTGGTCTTTGTG
Silene conica	1	mt	GAAGTGGAATACGTCCCCGCTCAA[R1]	18-10	Silene_conica_mito_101	5557	A>G	No k-mer coverage for reference allele	TGACTAAAAGAGAGAACTTCTCTTATTATTCTAAAGTCTTTTCAACCCTTATCCTCTCGCTACGGGAAATCGACCCCCTTTCTCCCACTTCGTGTCCTTTCGCTTTGGTCGAGCCCAACCAACCAGTCCTCCT
Silene conica	1	mt	GCTGTCTTCAAGTGTCATAGACGA	19-17	Silene_conica_mito_101	5557	A>G	No k-mer coverage for reference allele	AAAGAGAGAACTTCTCTTATTATTCTAAAGTCTTTTCAACCCTTATCCTCTCGCTACGGGAAATCGACCCCCTTTCTCCCACTTCGTGTCCTTTCGCTTTGGTCGAGCCCAACCAACCAGTCCTCCTCCTT
Silene conica	1	mt	GGACGAGGGCGTGGGGTTTCCTCA[R2]	26-12	Silene_conica_mito_101	5557	A>G	No k-mer coverage for reference allele	TTTTCAACCCTTATCCTCTCGCTACGGGAAATCGACCCCCTTTCTCCCACTTCGTGTCCTTTCGCTTTGGTCGAGCCCAACCAACCAGTCCTCCTCCTTTTTTCGTCACAAAATGAAGAAGCAGAAGTAGGAC
Silene conica	1	mt	GGCGGTCGGCAGTGACGCACAATT[R2]	22-13	Silene_conica_mito_101	5557	A>G	No k-mer coverage for reference allele	TAAAGTCTTTTCAACCCTTATCCTCTCGCTACGGGAAATCGACCCCCTTTCTCCCACTTCGTGTCCTTTCGCTTTGGTCGAGCCCAACCAACCAGTCCTCCTCCTTTTTTCGTCACAAAATGAAGAAGCAGAA
Silene conica	1	mt	AATCACAATATGCAGTGGTGCCTC	20-11	Silene_conica_mito_101	5557	A>G	No k-mer coverage for reference allele	AGAGAGAACTTCTCTTATTATTCTAAAGTCTTTTCAACCCTTATCCTCTCGCTACGGGAAATCGACCCCCTTTCTCCCACTTCGTGTCCTTTCGCTTTGGTCGAGCCCAACCAACCAGTCCTCCTCCTTTTTTCGTCACAAAATGAAGAAGCAGAAGTAGGACCAAACTGAGAGTAAGCAGCATAAACAAGTAGGT
Silene conica	1	mt	ACCACTAAATGATCTAGACAGAAA[R1]	21-16	Silene_conica_mito_101	5557	A>G	No k-mer coverage for reference allele	CAAAGGACTAATCTCGTCTACTAACTAAATGACTAAAAGAGAGAACTTCTCTTATTATTCTAAAGTCTTTTCAACCCTTATCCTCTCGCTACGGGAAATCGACCCCCTTTCTCCCACTTCGTGTCCTTTCGCT
Silene conica	1	mt	ACGCCAACCGGGAGACACCGAACA[R2]	34-9	Silene_conica_mito_101	5557	A>G	No k-mer coverage for reference allele	ACCCTTATCCTCTCGCTACGGGAAATCGACCCCCTTTCTCCCACTTCGTGTCCTTTCGCTTTGGTCGAGCCCAACCAACCAGTCCTCCTCCTTTTTTCGTCACAAAATGAAGAAGCAGAAGTAGGACCAAACT
Silene conica	1	mt	ACTTTCGTGCTAGAAATGCGAAAC	22-13	Silene_conica_mito_101	5557	A>G	No k-mer coverage for reference allele	TCTTTTCAACCCTTATCCTCTCGCTACGGGAAATCGACCCCCTTTCTCCCACTTCGTGTCCTTTCGCTTTGGTCGAGCCCAACCAACCAGTCCTCCTCCTTTTTTCGTCACAAAATGAAGAAGCAGAAGTAGGACCAAACTGAGAGTAAGCAGCAT
Silene conica	1	mt	ATGACATCCTAACCCTTCCCCCAA[R2]	18-15	Silene_conica_mito_101	5557	A>G	No k-mer coverage for reference allele	CTCTTATTATTCTAAAGTCTTTTCAACCCTTATCCTCTCGCTACGGGAAATCGACCCCCTTTCTCCCACTTCGTGTCCTTTCGCTTTGGTCGAGCCCAACCAACCAGTCCTCCTCCTTTTTTCGTCACAAAAT
Silene conica	1	mt	CACACTGATCTCTGGACGATCCTT	19-10	Silene_conica_mito_101	5557	A>G	No k-mer coverage for reference allele	CCCCTCGGGTGTACGTAAACTTTTCAACCAGGACCCGCATATAAAAAAGTCAAGGCAAAGGACTAATCTCGTCTACTAACTAAATGACTAAAAGAGAGAACTTCTCTTATTATTCTAAAGTCTTTTCAACCCTTATCCTCTCGCTACGGGAAATCGACCCCCTTTCTCCCACTTCGTGTCCTTTCGCTTTGGTCGAGCCCAACCAA
Silene conica	1	mt	CAGTTAACGTGTCTGTCATGGCCT[R2]	15-11	Silene_conica_mito_101	5557	A>G	No k-mer coverage for reference allele	AAGTCAAGGCAAAGGACTAATCTCGTCTACTAACTAAATGACTAAAAGAGAGAACTTCTCTTATTATTCTAAAGTCTTTTCAACCCTTATCCTCTCGCTACGGGAAATCGACCCCCTTTCTCCCACTTCGTGT
Silene conica	1	mt	GGAGGCATAGGCTGCACAAAGCCA[R1]	24-8	Silene_conica_mito_101	5557	A>G	No k-mer coverage for reference allele	ATTATTCTAAAGTCTTTTCAACCCTTATCCTCTCGCTACGGGAAATCGACCCCCTTTCTCCCACTTCGTGTCCTTTCGCTTTGGTCGAGCCCAACCAACCAGTCCTCCTCCTTTTTTCGTCACAAAATGA
Silene conica	2	cp	ACGTGTAACGGCGAATCTGGAGTA[R2]	13-12	Silene_conica_mito_101	5557	A>G	No k-mer coverage for reference allele	TTATCCTCTCGCTACGGGAAATCGACCCCCTTTCTCCCACTTCGTGTCCTTTCGCTTTGGTCGAGCCCAACCAACCAGTCCTCCTCCTTTTTTCGTCACAAAATGAAGAAGCAGAAGTAGGACCAAACTG
Silene conica	2	cp	CCGTCATTAGAATCTCGGACAAAC	10-9	Silene_conica_mito_101	5557	A>G	No k-mer coverage for reference allele	CGTCTACTAACTAAATGACTAAAAGAGAGAACTTCTCTTATTATTCTAAAGTCTTTTCAACCCTTATCCTCTCGCTACGGGAAATCGACCCCCTTTCTCCCACTTCGTGTCCTTTCGCTTTGGTCGAGCCCAACCAACCAGTCCTCCTCCTTTTTTCG
Silene conica	2	cp	ATAGAAAACTAACCTATACCGAAA	22-8	Silene_conica_mito_101	5557	A>G	No k-mer coverage for reference allele	AAGGCAAAGGACTAATCTCGTCTACTAACTAAATGACTAAAAGAGAGAACTTCTCTTATTATTCTAAAGTCTTTTCAACCCTTATCCTCTCGCTACGGGAAATCGACCCCCTTTCTCCCACTTCGTGTCCTTTCGCTTTGGTCGAGCCCAACCAACCAGTCCTCCTCCTTTTTTCGTCACAAAATGAAGAAGCAGAAG
Silene conica	2	cp	CCCAGCTAGCACTAGTCCCTTTAA	15-11	Silene_conica_mito_101	5557	A>G	No k-mer coverage for reference allele	AGGCCCCTCGGGTGTACGTAAACTTTTCAACCAGGACCCGCATATAAAAAAGTCAAGGCAAAGGACTAATCTCGTCTACTAACTAAATGACTAAAAGAGAGAACTTCTCTTATTATTCTAAAGTCTTTTCAACCCTTATCCTCTCGCTACGGGAAATCGACCCCCTTTCTCCCACTTCGTGTCCTTTCGCTTTGGTCGAGCCCAACCAACCAGTCCTCCTCCTTTTTT
Silene conica	3	cp	CATTACATGAGGTCAAACTGAAAG	8-8	Silene_conica_mito_101	5557	A>G	No k-mer coverage for reference allele	ATGACTAAAAGAGAGAACTTCTCTTATTATTCTAAAGTCTTTTCAACCCTTATCCTCTCGCTACGGGAAATCGACCCCCTTTCTCCCACTTCGTGTCCTTTCGCTTTGGTCGAGCCCAACCAACCAGTCCTCCTCCTTTTTTCGTCACAAAATGAAGAAG
Silene conica	3	cp	GAAGAGGTTTCATCCATTAAATGT	11-10	Silene_conica_mito_101	5557	A>G	No k-mer coverage for reference allele	TAAAAGAGAGAACTTCTCTTATTATTCTAAAGTCTTTTCAACCCTTATCCTCTCGCTACGGGAAATCGACCCCCTTTCTCCCACTTCGTGTCCTTTCGCTTTGGTCGAGCCCAACCAACCAGTCCTCCTCCTTTTTTCGTCACAAAATGAAGAAGCAGAAGTAGGACCAAACTGAGAGTAAGCAGCATAAACAAGTAGGTGGTCTTTGTGAATG
Silene conica	3	cp	AAATCGAAGAGAATTCAAAGTTAG	17-12	Silene_conica_mito_101	5557	A>G	No k-mer coverage for reference allele	TAAAGTCTTTTCAACCCTTATCCTCTCGCTACGGGAAATCGACCCCCTTTCTCCCACTTCGTGTCCTTTCGCTTTGGTCGAGCCCAACCAACCAGTCCTCCTCCTTTTTTCGTCACAAAATGAAGAAGCAGAAGTAGGACCAAACTGAGAGTAAGCAGCATAAACAAGTAGGTGGTCTTTGTGAATGAGAAATAAAAGCTTTGTAGTTTCAGAGGAATCCAATTGAGAATTT
Silene conica	3	cp	AGCAATTTGCTGTTCTCGCGAAAC	22-16	Silene_conica_mito_101	5557	A>G	No k-mer coverage for reference allele	TCTACTAACTAAATGACTAAAAGAGAGAACTTCTCTTATTATTCTAAAGTCTTTTCAACCCTTATCCTCTCGCTACGGGAAATCGACCCCCTTTCTCCCACTTCGTGTCCTTTCGCTTTGGTCGAGCCCAACCAACCAGTCCTCCTCCTTTTTTCGTCACAAAATGAAGAAGCAGAAGTAGGACCAAACTGAGAGTAAGCAGCATAAACAAGTAGGTGGTCTTT
Silene conica	3	cp	CCTTCGACACATGATTAAGGCGCC[R2]	15-12	Silene_conica_mito_101	5557	A>G	No k-mer coverage for reference allele	AAAGGACTAATCTCGTCTACTAACTAAATGACTAAAAGAGAGAACTTCTCTTATTATTCTAAAGTCTTTTCAACCCTTATCCTCTCGCTACGGGAAATCGACCCCCTTTCTCCCACTTCGTGTCCTTTCGCTT
Silene conica	3	cp	GACTATACTACATTGCTTGATAAA	17-6	Silene_conica_mito_101	5557	A>G	No k-mer coverage for reference allele	AAAAGTCAAGGCAAAGGACTAATCTCGTCTACTAACTAAATGACTAAAAGAGAGAACTTCTCTTATTATTCTAAAGTCTTTTCAACCCTTATCCTCTCGCTACGGGAAATCGACCCCCTTTCTCCCACTTCGTGTCCTTTCGCTTTGGTCGAGCCCAACCA
Silene conica	3	mt	GCGAGTGCTCCTGGCCAAGCCCTT[R1]	20-14	Silene_conica_mito_101	5557	A>G	No k-mer coverage for reference allele	CCTCTCGCTACGGGAAATCGACCCCCTTTCTCCCACTTCGTGTCCTTTCGCTTTGGTCGAGCCCAACCAACCAGTCCTCCTCCTTTTTTCGTCACAAAATGAAGAAGCAGAAGTAGGACCAAACTGAGAGTAA
Silene conica	3	mt	AAAACCACCGGGGAACATGTTCAC	25-17	Silene_conica_mito_101	5557	A>G	No k-mer coverage for reference allele	TATTCTAAAGTCTTTTCAACCCTTATCCTCTCGCTACGGGAAATCGACCCCCTTTCTCCCACTTCGTGTCCTTTCGCTTTGGTCGAGCCCAACCAACCAGTCCTCCTCCTTTTTTCGTCACAAAATGAAGAAGCAGAAGTAGGACCAAACTGAGAGTAAGCAGCATAAACAAGTAGGTGGTCTTTGTGAATGAGAAATAAAAGCTTTGTAGTTT
Silene conica	3	mt	AAAACGGGCCCTTACTATCACCGG	21-21	Silene_conica_mito_101	5557	A>G	No k-mer coverage for reference allele	CGTCTACTAACTAAATGACTAAAAGAGAGAACTTCTCTTATTATTCTAAAGTCTTTTCAACCCTTATCCTCTCGCTACGGGAAATCGACCCCCTTTCTCCCACTTCGTGTCCTTTCGCTTTGGTCGAGCCCAACCAACCAGTCCTCCTCCTTTTTTCGTCACAAAATGAAGAAGCAG
Silene conica	3	mt	AACAACATGACTAGCCTGCAAACA	15-15	Silene_conica_mito_101	5557	A>G	No k-mer coverage for reference allele	CAAATGAAATGAATGCCGTTGAGCTTCAATCATGAGGCAGGCCCCTCGGGTGTACGTAAACTTTTCAACCAGGACCCGCATATAAAAAAGTCAAGGCAAAGGACTAATCTCGTCTACTAACTAAATGACTAAAAGAGAGAACTTCTCTTATTATTCTAAAGTCTTTTCAACCCTTATCCTCTCGCTACGGGAAATCGACCCCCTTTCTCCCACTTCGTGTCCTTTCGCTTT
Silene conica	3	mt	AAGACCATTGCAGCAGCTAAACCA	14-9	Silene_conica_mito_101	5557	A>G	No k-mer coverage for reference allele	TACTAACTAAATGACTAAAAGAGAGAACTTCTCTTATTATTCTAAAGTCTTTTCAACCCTTATCCTCTCGCTACGGGAAATCGACCCCCTTTCTCCCACTTCGTGTCCTTTCGCTTTGGTCGAGCCCAACCAACCAGTCCTCCTCCTTTTTTCGTCACAAAATGAAGAAGCAGAAGTAGGACCAAACTGAGA
Silene conica	3	mt	AATCGAAAGTCAAGCCATTAAAAC[R2]	17-10	Silene_conica_mito_101	5557	A>G	No k-mer coverage for reference allele	ACCCGCATATAAAAAAGTCAAGGCAAAGGACTAATCTCGTCTACTAACTAAATGACTAAAAGAGAGAACTTCTCTTATTATTCTAAAGTCTTTTCAACCCTTATCCTCTCGCTACGGGAAATCGACCCCCTTT
Silene conica	3	mt	AGGCGGAATACTGAAAAGCTGACG[R1]	16-10	Silene_conica_mito_101	5557	A>G	No k-mer coverage for reference allele	TTTCAACCCTTATCCTCTCGCTACGGGAAATCGACCCCCTTTCTCCCACTTCGTGTCCTTTCGCTTTGGTCGAGCCCAACCAACCAGTCCTCCTCCTTTTTTCGTCACAAAATGAAGAAGCAGAAGTAGG
Silene conica	3	mt	CCCCATAGAAAATGACTGGCGTAT	23-21	Silene_conica_mito_101	5557	A>G	No k-mer coverage for reference allele	GAGAACTTCTCTTATTATTCTAAAGTCTTTTCAACCCTTATCCTCTCGCTACGGGAAATCGACCCCCTTTCTCCCACTTCGTGTCCTTTCGCTTTGGTCGAGCCCAACCAACCAGTCCTCCTCCTTTTTTCGTCACAAAATGAAGAAGCAGAAGTAGGACCAAACTGAGAGTAAGCAGCATAAACAAGTAGGTGGTCT
Silene conica	3	mt	CCTGCTACACCAGAGACCTGTCCA	29-26	Silene_conica_mito_101	5557	A>G	No k-mer coverage for reference allele	AGGACTAATCTCGTCTACTAACTAAATGACTAAAAGAGAGAACTTCTCTTATTATTCTAAAGTCTTTTCAACCCTTATCCTCTCGCTACGGGAAATCGACCCCCTTTCTCCCACTTCGTGTCCTTTCGCTTTGGTCGAGCCCAACCAACCAGTCCTCCTCCTTTTTTCGTCACAAAATGAAGAAGCAGAAGTAGGACCAAACTGAGAG
Silene conica	3	mt	CGCCATATTTACGTAAGATACCGA	26-24	Silene_conica_mito_101	5557	A>G	No k-mer coverage for reference allele	AAGGCAAAGGACTAATCTCGTCTACTAACTAAATGACTAAAAGAGAGAACTTCTCTTATTATTCTAAAGTCTTTTCAACCCTTATCCTCTCGCTACGGGAAATCGACCCCCTTTCTCCCACTTCGTGTCCTTTCGCTTTGGTCGAGCCCAACCAACCAGTCCTCCTCCTT
Silene conica	3	mt	CGTAGCAATTATGGATGAAAGGAC[R1]	18-16	Silene_conica_mito_101	5557	A>G	No k-mer coverage for reference allele	AAAGAGAGAACTTCTCTTATTATTCTAAAGTCTTTTCAACCCTTATCCTCTCGCTACGGGAAATCGACCCCCTTTCTCCCACTTCGTGTCCTTTCGCTTTGGTCGAGCCCAACCAACCAGTCCTCCTCCTTTT
Silene conica	3	mt	CTTTCATGTCTTGTTACGTGTGGA[R1]	27-23	Silene_conica_mito_101	5557	A>G	No k-mer coverage for reference allele	AGGACTAATCTCGTCTACTAACTAAATGACTAAAAGAGAGAACTTCTCTTATTATTCTAAAGTCTTTTCAACCCTTATCCTCTCGCTACGGGAAATCGACCCCCTTTCTCCCACTTCGTGTCCTTTCGCTTTG
Silene conica	3	mt	TAAGTGGAAACCTATGAGCCCAGC[R1]	28-20	Silene_conica_mito_101	5557	A>G	No k-mer coverage for reference allele	AACCAGGACCCGCATATAAAAAAGTCAAGGCAAAGGACTAATCTCGTCTACTAACTAAATGACTAAAAGAGAGAACTTCTCTTATTATTCTAAAGTCTTTTCAACCCTTATCCTCTCGCTACGGGAAATCGAC
Silene conica	1	cp	AACCCTCGCACCGTGGCGTACAGC[R2]	34-29	Silene_conica_mito_101	56619	A>G	No k-mer coverage for reference allele	TGCCTTAAGTCTTTTCTAAATAAAGGCATCGCTATAAGGTAAGGGCGTTTACATTATTTACTTTACATAATAGGGGACATAAACGGGAGTAGATCCGAGGGCTTTTCCAATATCCGAACACCCCTCGTCTCCC
Silene conica	1	cp	ATGGCTAGGAATCTATAATCTGAG	25-11	Silene_conica_mito_101	56619	A>G	No k-mer coverage for reference allele	CAATATCCGAACACCCCTCGTCTCCCCGTCTTTCTCTTGGGCTCAACTCCTGGTGCAAGGCCTATAAGGCCCCAACCAACCACCAAAGAAGTAAAATCTTCACCTGCAGCTTCTTCAATTCATAGAGGGCTCTTAGAGACCCCATCTTGAAAACGGATTGCTTGTGATTCTTCTTAGCTTTCCCTTTAGACTTGGTATTGGCTTTCTCAA
Silene conica	1	cp	CCTATCATACCAGAATCATCATGC[R1]	31-30	Silene_conica_mito_101	56619	A>G	No k-mer coverage for reference allele	ATTATTTACTTTACATAATAGGGGACATAAACGGGAGTAGATCCGAGGGCTTTTCCAATATCCGAACACCCCTCGTCTCCCCGTCTTTCTCTTGGGCTCAACTCCTGGTGCAAGGCCTATAAGGCCCCAACCA
Silene conica	1	cp	AAGACCACTGCGTACTCTGTCCAG[R1]	49-20	Silene_conica_mito_101	56619	A>G	No k-mer coverage for reference allele	CTTTTCCAATATCCGAACACCCCTCGTCTCCCCGTCTTTCTCTTGGGCTCAACTCCTGGTGCAAGGCCTATAAGGCCCCAACCAACCACCAAAGAAGTAAAATCTTCACCTGCAGCTTCTTCAATTCATAGAG
Silene conica	1	cp	CAAAGTCGACTACGCGTACACCAC[R1]	28-15	Silene_conica_mito_101	56619	A>G	No k-mer coverage for reference allele	CATAATAGGGGACATAAACGGGAGTAGATCCGAGGGCTTTTCCAATATCCGAACACCCCTCGTCTCCCCGTCTTTCTCTTGGGCTCAACTCCTGGTGCAAGGCCTATAAGGCCCCAACCAACCACCAAAGAAG
Silene conica	1	cp	GAGAAAAAGACCGTATAGGGAACC[R2]	20-18	Silene_conica_mito_101	56619	A>G	No k-mer coverage for reference allele	GAGTAGATCCGAGGGCTTTTCCAATATCCGAACACCCCTCGTCTCCCCGTCTTTCTCTTGGGCTCAACTCCTGGTGCAAGGCCTATAAGGCCCCAACCAACCACCAAAGAAGTAAAATCTTCACCTGCAGCTT
Silene conica	1	mt	CAAATTCTGAACTCTAGGAAAACC	14-5	Silene_conica_mito_101	56619	A>G	No k-mer coverage for reference allele	AAATCTTTCTTAGTTGGATACGCCTACAGACAGGTTTAATGTTAACTCTCGGTATCTAAAGTGGCTGCCTTAAGTCTTTTCTAAATAAAGGCATCGCTATAAGGTAAGGGCGTTTACATTATTTACTTTACATAATAGGGGACATAAACGGGAGTAGATCCGAGGGCTTTTCCAATATCCGAACACCCCTCGTCTCCCCG
Silene conica	1	mt	AAGACAAATAGCCCGTTCGCTAAA[R1]	13-10	Silene_conica_mito_101	56619	A>G	No k-mer coverage for reference allele	GTAAGGGCGTTTACATTATTTACTTTACATAATAGGGGACATAAACGGGAGTAGATCCGAGGGCTTTTCCAATATCCGAACACCCCTCGTCTCCCCGTCTTTCTCTTGGGCTCAACTCCTGGTGCAAGGCCTA
Silene conica	1	mt	AATGATGCCTCTGGAAGCAAGATA[R1]	24-9	Silene_conica_mito_101	56619	A>G	No k-mer coverage for reference allele	TACATAATAGGGGACATAAACGGGAGTAGATCCGAGGGCTTTTCCAATATCCGAACACCCCTCGTCTCCCCGTCTTTCTCTTGGGCTCAACTCCTGGTGCAAGGCCTATAAGGCCCCAACCAACCACCAAAGA
Silene conica	1	mt	ACCAAGGCGAATTGGCCCGAAGCA[R1]	17-11	Silene_conica_mito_101	56619	A>G	No k-mer coverage for reference allele	TTACATTATTTACTTTACATAATAGGGGACATAAACGGGAGTAGATCCGAGGGCTTTTCCAATATCCGAACACCCCTCGTCTCCCCGTCTTTCTCTTGGGCTCAACTCCTGGTGCAAGGCCTATAAGGCCCCA
Silene conica	1	mt	AGCACACCCAGATAGGATCTGGTT[R1]	22-18	Silene_conica_mito_101	56619	A>G	No k-mer coverage for reference allele	ACTTTACATAATAGGGGACATAAACGGGAGTAGATCCGAGGGCTTTTCCAATATCCGAACACCCCTCGTCTCCCCGTCTTTCTCTTGGGCTCAACTCCTGGTGCAAGGCCTATAAGGCCCCAACCAACCACCA
Silene conica	1	mt	ATAATGCAAATTCCACGGGAGAAA	22-19	Silene_conica_mito_101	56619	A>G	No k-mer coverage for reference allele	TATAAGGTAAGGGCGTTTACATTATTTACTTTACATAATAGGGGACATAAACGGGAGTAGATCCGAGGGCTTTTCCAATATCCGAACACCCCTCGTCTCCCCGTCTTTCTCTTGGGCTCAACTCCTGGTGCAAGGCCTATAAGGCCCCAACCAACCACCAAAGAAGTAAAATCTTCACCTGCAGCTTCTTCAATTCATAG
Silene conica	1	mt	CATACGGAACATCCGAACTAGTTC[R2]	21-18	Silene_conica_mito_101	56619	A>G	No k-mer coverage for reference allele	GTAAGGGCGTTTACATTATTTACTTTACATAATAGGGGACATAAACGGGAGTAGATCCGAGGGCTTTTCCAATATCCGAACACCCCTCGTCTCCCCGTCTTTCTCTTGGGCTCAACTCCTGGTGCAAGGCCTA
Silene conica	1	mt	CCGTAACCATCCGTCGCAGCACAC[R2]	20-20	Silene_conica_mito_101	56619	A>G	No k-mer coverage for reference allele	CATCGCTATAAGGTAAGGGCGTTTACATTATTTACTTTACATAATAGGGGACATAAACGGGAGTAGATCCGAGGGCTTTTCCAATATCCGAACACCCCTCGTCTCCCCGTCTTTCTCTTGGGCTCAACTCCTG
Silene conica	1	mt	CCTAAAAATCTATTCAGCTTGCTT	16-3	Silene_conica_mito_101	56619	A>G	No k-mer coverage for reference allele	AAGGTAAGGGCGTTTACATTATTTACTTTACATAATAGGGGACATAAACGGGAGTAGATCCGAGGGCTTTTCCAATATCCGAACACCCCTCGTCTCCCCGTCTTTCTCTTGGGCTCAACTCCTGGTGCAAGGCCTATAAGGCCCCAACCAACCACCAAAGAAGTAAAATCTTC
Silene conica	1	mt	GGCGGCAAACTCTCCGTGGACCCC	12-11	Silene_conica_mito_101	56619	A>G	No k-mer coverage for reference allele	CTGCCTTAAGTCTTTTCTAAATAAAGGCATCGCTATAAGGTAAGGGCGTTTACATTATTTACTTTACATAATAGGGGACATAAACGGGAGTAGATCCGAGGGCTTTTCCAATATCCGAACACCCCTCGTCTCCCCGTCTTTCTCTTGGGCTCAACTCCTGGTGCAAGGCCT
Silene conica	1	mt	GTCTCATCCATATGTCGTCTTGGC	15-5	Silene_conica_mito_101	56619	A>G	No k-mer coverage for reference allele	GTCTTTTCTAAATAAAGGCATCGCTATAAGGTAAGGGCGTTTACATTATTTACTTTACATAATAGGGGACATAAACGGGAGTAGATCCGAGGGCTTTTCCAATATCCGAACACCCCTCGTCTCCCCGTCTTTCTCTTGGGCTCAACTCCTGGTGCAAGGCCTATAAGGCCCCAACCAACCACCAAAGAAGTA
Silene conica	1	mt	AAAGAACCCGATGACCACATGAAA[R2]	7-7	Silene_conica_mito_101	56619	A>G	No k-mer coverage for reference allele	CATCGCTATAAGGTAAGGGCGTTTACATTATTTACTTTACATAATAGGGGACATAAACGGGAGTAGATCCGAGGGCTTTTCCAATATCCGAACACCCCTCGTCTCCCCGTCTTTCTCTTGGGCTCAACTCCTG
Silene conica	1	mt	ACAGACTTAACCTAAGGCATAAAC[R1]	15-15	Silene_conica_mito_101	56619	A>G	No k-mer coverage for reference allele	AGGGGACATAAACGGGAGTAGATCCGAGGGCTTTTCCAATATCCGAACACCCCTCGTCTCCCCGTCTTTCTCTTGGGCTCAACTCCTGGTGCAAGGCCTATAAGGCCCCAACCAACCACCAAAGAAGTAAAAT
Silene conica	1	mt	AGAACTGAAAACATTCCTGCAGGT[R2]	22-13	Silene_conica_mito_101	56619	A>G	No k-mer coverage for reference allele	AAGGCATCGCTATAAGGTAAGGGCGTTTACATTATTTACTTTACATAATAGGGGACATAAACGGGAGTAGATCCGAGGGCTTTTCCAATATCCGAACACCCCTCGTCTCCCCGTCTTTCTCTTGGGCTCAACT
Silene conica	1	mt	AGACGACGTTCGCATTTGAGCGAA[R1]	26-16	Silene_conica_mito_101	56619	A>G	No k-mer coverage for reference allele	ACATAAACGGGAGTAGATCCGAGGGCTTTTCCAATATCCGAACACCCCTCGTCTCCCCGTCTTTCTCTTGGGCTCAACTCCTGGTGCAAGGCCTATAAGGCCCCAACCAACCACCAAAGAAGTAAAATCTTCA
Silene conica	1	mt	AGTCCATGTAGCCATAGGACTAAA[R1]	21-14	Silene_conica_mito_101	56619	A>G	No k-mer coverage for reference allele	AGTAGATCCGAGGGCTTTTCCAATATCCGAACACCCCTCGTCTCCCCGTCTTTCTCTTGGGCTCAACTCCTGGTGCAAGGCCTATAAGGCCCCAACCAACCACCAAAGAAGTAAAATCTTCACCTGCAGCTTC
Silene conica	1	mt	CACCAGTATACCGTTCTTGAATCC[R1]	23-8	Silene_conica_mito_101	56619	A>G	No k-mer coverage for reference allele	ACATAAACGGGAGTAGATCCGAGGGCTTTTCCAATATCCGAACACCCCTCGTCTCCCCGTCTTTCTCTTGGGCTCAACTCCTGGTGCAAGGCCTATAAGGCCCCAACCAACCACCAAAGAAGTAAAATCTTCA
Silene conica	1	mt	CATGTGCCCGCGCTGTCACGCCGG	13-11	Silene_conica_mito_101	56619	A>G	No k-mer coverage for reference allele	CTCTCGGTATCTAAAGTGGCTGCCTTAAGTCTTTTCTAAATAAAGGCATCGCTATAAGGTAAGGGCGTTTACATTATTTACTTTACATAATAGGGGACATAAACGGGAGTAGATCCGAGGGCTTTTCCAATATCCGAACACCCCTCGTCTCCCCGTCTTTCTCTTGGGCTCAACTCCTGGTGCAAGGCCTATAAGGCCCCAACCAACCACCAAAGAAGTAAAATCTTCACCTG
Silene conica	1	mt	CTAAGTTACTGATCGCGACCCCCA	15-11	Silene_conica_mito_101	56619	A>G	No k-mer coverage for reference allele	ATGTTAACTCTCGGTATCTAAAGTGGCTGCCTTAAGTCTTTTCTAAATAAAGGCATCGCTATAAGGTAAGGGCGTTTACATTATTTACTTTACATAATAGGGGACATAAACGGGAGTAGATCCGAGGGCTTTTCCAATATCCGAACACCCCTCGTCTCCCCGTCTTTCTCTTGGGC
Silene conica	1	mt	CTCGCACCATCGGAACTGACTAAT[R1]	25-23	Silene_conica_mito_101	56619	A>G	No k-mer coverage for reference allele	AACGGGAGTAGATCCGAGGGCTTTTCCAATATCCGAACACCCCTCGTCTCCCCGTCTTTCTCTTGGGCTCAACTCCTGGTGCAAGGCCTATAAGGCCCCAACCAACCACCAAAGAAGTAAAATCTTCACCTGC
Silene conica	1	mt	GTCTTCGACTAGTATCATACGAGC	17-8	Silene_conica_mito_101	56619	A>G	No k-mer coverage for reference allele	TGCCTTAAGTCTTTTCTAAATAAAGGCATCGCTATAAGGTAAGGGCGTTTACATTATTTACTTTACATAATAGGGGACATAAACGGGAGTAGATCCGAGGGCTTTTCCAATATCCGAACACCCCTCGTCTCCCCGTCTTTCTCTTGGGCTCAACTCCTGGTGCAAGGCCTATAAGGCCCCA
Silene conica	2	cp	CGCTAAATTTATGAATTAACGCGT[R1]	6-5	Silene_conica_mito_101	56619	A>G	No k-mer coverage for reference allele	CTTAAGTCTTTTCTAAATAAAGGCATCGCTATAAGGTAAGGGCGTTTACATTATTTACTTTACATAATAGGGGACATAAACGGGAGTAGATCCGAGGGCTTTTCCAATATCCGAACACCCCTCGTCTCCCCGT
Silene conica	2	cp	ATAAAAACGGCCATTTGAGCTGTA	14-8	Silene_conica_mito_101	56619	A>G	No k-mer coverage for reference allele	AGATATCGCTACCGAAAGAAACAGCATTAAATCTTTCTTAGTTGGATACGCCTACAGACAGGTTTAATGTTAACTCTCGGTATCTAAAGTGGCTGCCTTAAGTCTTTTCTAAATAAAGGCATCGCTATAAGGTAAGGGCGTTTACATTATTTACTTTACATAATAGGGGACATAAACGGGAGTAGATCCGAGGGCTTTTCCAATATCCGAACACCCCTCGTCTCC
Silene conica	2	cp	CATCCACAGAGATTAACGACACGT	20-9	Silene_conica_mito_101	56619	A>G	No k-mer coverage for reference allele	TCCAATATCCGAACACCCCTCGTCTCCCCGTCTTTCTCTTGGGCTCAACTCCTGGTGCAAGGCCTATAAGGCCCCAACCAACCACCAAAGAAGTAAAATCTTCACCTGCAGCTTCTTCAATTCAT
Silene conica	2	cp	AGCAGCCTAGAAGATCAAGAAACA[R2]	14-6	Silene_conica_mito_101	56619	A>G	No k-mer coverage for reference allele	AATATCCGAACACCCCTCGTCTCCCCGTCTTTCTCTTGGGCTCAACTCCTGGTGCAAGGCCTATAAGGCCCCAACCAACCACCAAAGAAGTAAAATCTTCACCTGCAGCTTCTTCAATTCATAGAGGGCTCTT
Silene conica	2	cp	CCAGTGAGTGCGCCGTAAGCTTAT[R1]	11-7	Silene_conica_mito_101	56619	A>G	No k-mer coverage for reference allele	TTACATTATTTACTTTACATAATAGGGGACATAAACGGGAGTAGATCCGAGGGCTTTTCCAATATCCGAACACCCCTCGTCTCCCCGTCTTTCTCTTGGGCTCAACTCCTGGTGCAAGGCCTATAAGGCCCCA
Silene conica	2	cp	CCTCGCCGGCAATATAGGGAGAAT	18-13	Silene_conica_mito_101	56619	A>G	No k-mer coverage for reference allele	CTACAGACAGGTTTAATGTTAACTCTCGGTATCTAAAGTGGCTGCCTTAAGTCTTTTCTAAATAAAGGCATCGCTATAAGGTAAGGGCGTTTACATTATTTACTTTACATAATAGGGGACATAAACGGGAGTAGATCCGAGGGCTTTTCCAATATCCGAACACCCCTCGTCTCCCCGTCTTTCTCTTGGGCTCAACTCCTGGTGCAAGGCCT
Silene conica	2	cp	GATAACTGCGCTGCGGACGCACAT[R2]	14-8	Silene_conica_mito_101	56619	A>G	No k-mer coverage for reference allele	TTACATTATTTACTTTACATAATAGGGGACATAAACGGGAGTAGATCCGAGGGCTTTTCCAATATCCGAACACCCCTCGTCTCCCCGTCTTTCTCTTGGGCTCAACTCCTGGTGCAAGGCCTATAAGGCCCCA
Silene conica	2	cp	AAAGTTCTAAAGAATACCGAGAAA	20-10	Silene_conica_mito_101	56619	A>G	No k-mer coverage for reference allele	CTCGGTATCTAAAGTGGCTGCCTTAAGTCTTTTCTAAATAAAGGCATCGCTATAAGGTAAGGGCGTTTACATTATTTACTTTACATAATAGGGGACATAAACGGGAGTAGATCCGAGGGCTTTTCCAATATCCGAACACCCCTCGTCTCCCCGTCTTTCTCTTGGGCTCAACTCCTGGTGCAAGGCCT
Silene conica	2	cp	CAAAGTTCCGCTTCTTGAGCTCTC	14-6	Silene_conica_mito_101	56619	A>G	No k-mer coverage for reference allele	GACATAAACGGGAGTAGATCCGAGGGCTTTTCCAATATCCGAACACCCCTCGTCTCCCCGTCTTTCTCTTGGGCTCAACTCCTGGTGCAAGGCCTATAAGGCCCCAACCAACCACCAAAGAAGTAAAATCTTCACCTGCAGCTTCTTCAATTCATAGAGGGCTCTTAGAGACCCCATCTTGAAA
Silene conica	3	cp	AGATGTAGGATAGCCAAGGTAATA[R1]	20-7	Silene_conica_mito_101	56619	A>G	No k-mer coverage for reference allele	CTTAAGTCTTTTCTAAATAAAGGCATCGCTATAAGGTAAGGGCGTTTACATTATTTACTTTACATAATAGGGGACATAAACGGGAGTAGATCCGAGGGCTTTTCCAATATCCGAACACCCCTCGTCTCCCCGT
Silene conica	3	cp	ATGGCCGACACCGTGTGCGAGCTA	10-10	Silene_conica_mito_101	56619	A>G	No k-mer coverage for reference allele	AAGGCATCGCTATAAGGTAAGGGCGTTTACATTATTTACTTTACATAATAGGGGACATAAACGGGAGTAGATCCGAGGGCTTTTCCAATATCCGAACACCCCTCGTCTCC
Silene conica	3	cp	AGATGTAGGATAGCCAAGGTAATA[R2]	20-7	Silene_conica_mito_101	56619	A>G	No k-mer coverage for reference allele	AATATCCGAACACCCCTCGTCTCCCCGTCTTTCTCTTGGGCTCAACTCCTGGTGCAAGGCCTATAAGGCCCCAACCAACCACCAAAGAAGTAAAATCTTCACCTGCAGCTTCTTCAATTCATAGAGGGCTCTT
Silene conica	3	cp	ACGATGATGTAATGGAGCAGAATC	10-9	Silene_conica_mito_101	56619	A>G	No k-mer coverage for reference allele	TAAAGGCATCGCTATAAGGTAAGGGCGTTTACATTATTTACTTTACATAATAGGGGACATAAACGGGAGTAGATCCGAGGGCTTTTCCAATATCCGAACACCCCTCGTCTCCCCGTCTTTCTCTTGGGCTCAACTCCTGGTGCAAGGCCTATAAGGCCCCAACCAACCACCAAAGAAGTAAAATCTTCACCTGCAGCTTCTT
Silene conica	3	cp	ACACGAATCCCAGTCCATCCTATG[R2]	13-8	Silene_conica_mito_101	56619	A>G	No k-mer coverage for reference allele	AAGGCATCGCTATAAGGTAAGGGCGTTTACATTATTTACTTTACATAATAGGGGACATAAACGGGAGTAGATCCGAGGGCTTTTCCAATATCCGAACACCCCTCGTCTCCCCGTCTTTCTCTTGGGCTCAACT
Silene conica	3	cp	CCAACGCATACACGATTACATATA	20-11	Silene_conica_mito_101	56619	A>G	No k-mer coverage for reference allele	TAAGGGCGTTTACATTATTTACTTTACATAATAGGGGACATAAACGGGAGTAGATCCGAGGGCTTTTCCAATATCCGAACACCCCTCGTCTCCCCGTCTTTCTCTTGGGCTCAACTCCTGGTGCAAGGCCTATAAGGCCCCAACCAACC
Silene conica	3	cp	CCCTTCTCAAGCTCACAGAACAAA	14-12	Silene_conica_mito_101	56619	A>G	No k-mer coverage for reference allele	GTTTACATTATTTACTTTACATAATAGGGGACATAAACGGGAGTAGATCCGAGGGCTTTTCCAATATCCGAACACCCCTCGTCTCCCCGTCTTTCTCTTGGGCTCAACTCCTGGTGCAAGGCCTATAAGGCCCCAACCAA
Silene conica	3	cp	CCTAGCAAACTCTGCGGTTTTCGT[R1]	16-6	Silene_conica_mito_101	56619	A>G	No k-mer coverage for reference allele	GGGCGTTTACATTATTTACTTTACATAATAGGGGACATAAACGGGAGTAGATCCGAGGGCTTTTCCAATATCCGAACACCCCTCGTCTCCCCGTCTTTCTCTTGGGCTCAACTCCTGGTGCAAGGCCTATAAG
Silene conica	3	cp	GCTTGCCAGTAGTGTTCGAAAAGT[R1]	15-5	Silene_conica_mito_101	56619	A>G	No k-mer coverage for reference allele	TACTTTACATAATAGGGGACATAAACGGGAGTAGATCCGAGGGCTTTTCCAATATCCGAACACCCCTCGTCTCCCCGTCTTTCTCTTGGGCTCAACTCCTGGTGCAAGGCCTATAAGGCCCCAACCAACCACC
Silene conica	3	mt	CTGTAAAACCACGCGGTAAATATT[R1]	27-25	Silene_conica_mito_101	56619	A>G	No k-mer coverage for reference allele	GCTGCCTTAAGTCTTTTCTAAATAAAGGCATCGCTATAAGGTAAGGGCGTTTACATTATTTACTTTACATAATAGGGGACATAAACGGGAGTAGATCCGAGGGCTTTTCCAATATCCGAACACCCCTCGTCTC
Silene conica	3	mt	AAATGCACCGAACGATCTCTGAAT[R2]	26-10	Silene_conica_mito_101	56619	A>G	No k-mer coverage for reference allele	ATAAAGGCATCGCTATAAGGTAAGGGCGTTTACATTATTTACTTTACATAATAGGGGACATAAACGGGAGTAGATCCGAGGGCTTTTCCAATATCCGAACACCCCTCGTCTCCCCGTCTTTCTCTTGGGCTCA
Silene conica	3	mt	ACGAGAGCAAATCCTGGCGACGCC[R2]	20-20	Silene_conica_mito_101	56619	A>G	No k-mer coverage for reference allele	ACATAAACGGGAGTAGATCCGAGGGCTTTTCCAATATCCGAACACCCCTCGTCTCCCCGTCTTTCTCTTGGGCTCAACTCCTGGTGCAAGGCCTATAAGGCCCCAACCAACCACCAAAGAAGTAAAATCTTCA
Silene conica	3	mt	AGATGCAAGGCGTCCACAAGCCGA	26-6	Silene_conica_mito_101	56619	A>G	No k-mer coverage for reference allele	GTCTTTTCTAAATAAAGGCATCGCTATAAGGTAAGGGCGTTTACATTATTTACTTTACATAATAGGGGACATAAACGGGAGTAGATCCGAGGGCTTTTCCAATATCCGAACACCCCTCGTCTCCCCGTCTTTCTCTTGGGCTCAACTCCTGGTGCAAGGCCTATAAGGCCC
Silene conica	3	mt	CCAGCCCTTCAAGTAAAACAACTA	17-17	Silene_conica_mito_101	56619	A>G	No k-mer coverage for reference allele	AGGGCTTTTCCAATATCCGAACACCCCTCGTCTCCCCGTCTTTCTCTTGGGCTCAACTCCTGGTGCAAGGCCTATAAGGCCCCAACCAACCACCAAAGAAGTAAAATCTTCACCTGCAGCTTCTTCAATTCATAGAGGGCTCTTAGAGACCCCATCTTGAAAACGGATTGCTTGTGATTCTTCTTAGCTTTCCCTTTAGACTTGGTATTGGCTTTCTCAATCCG
Silene conica	3	mt	CCCACAATAACCTCGGCCCCCGAT[R1]	16-9	Silene_conica_mito_101	56619	A>G	No k-mer coverage for reference allele	AATAAAGGCATCGCTATAAGGTAAGGGCGTTTACATTATTTACTTTACATAATAGGGGACATAAACGGGAGTAGATCCGAGGGCTTTTCCAATATCCGAACACCCCTCGTCTCCCCGTCTTTCTCTTGGGCTC
Silene conica	3	mt	CCGCGGCTGCATTTCATGGGTGTA[R2]	27-13	Silene_conica_mito_101	56619	A>G	No k-mer coverage for reference allele	ACATAAACGGGAGTAGATCCGAGGGCTTTTCCAATATCCGAACACCCCTCGTCTCCCCGTCTTTCTCTTGGGCTCAACTCCTGGTGCAAGGCCTATAAGGCCCCAACCAACCACCAAAGAAGTAAAATCTTCA
Silene conica	3	mt	CGCTCCAGTCCTTCGCAAACGGAA	14-5	Silene_conica_mito_101	56619	A>G	No k-mer coverage for reference allele	CTTTACATAATAGGGGACATAAACGGGAGTAGATCCGAGGGCTTTTCCAATATCCGAACACCCCTCGTCTCCCCGTCTTTCTCTTGGGCTCAACTCCTGGTGCAAGGCCTATAAGGCCCCAACCAACCACCAAAGAAGTAAAATCTTCACCTGCAGCTTCTTCAATTCATAGAGGGCTCTTAGAGACCCCATCTT
Silene conica	3	mt	AAAGCTATCATGAAATCTTAGGTG[R2]	18-8	Silene_conica_mito_101	56619	A>G	No k-mer coverage for reference allele	ACATAATAGGGGACATAAACGGGAGTAGATCCGAGGGCTTTTCCAATATCCGAACACCCCTCGTCTCCCCGTCTTTCTCTTGGGCTCAACTCCTGGTGCAAGGCCTATAAGGCCCCAACCAACCACCAAAGAA
Silene conica	3	mt	ACAGGGCGGCCGAGTAAGACCCTA	21-16	Silene_conica_mito_101	56619	A>G	No k-mer coverage for reference allele	TTACATTATTTACTTTACATAATAGGGGACATAAACGGGAGTAGATCCGAGGGCTTTTCCAATATCCGAACACCCCTCGTCTCCCCGTCTTTCTCTTGGGCTCAACTCCTGGTGCAAGGCCTATAAGGCCCCAACCAACCACCAAAGAAGTAAAATCTTCACCTG
Silene conica	3	mt	ATCAAACAAGATCCGCACCCCCCA	30-22	Silene_conica_mito_101	56619	A>G	No k-mer coverage for reference allele	GGCATCGCTATAAGGTAAGGGCGTTTACATTATTTACTTTACATAATAGGGGACATAAACGGGAGTAGATCCGAGGGCTTTTCCAATATCCGAACACCCCTCGTCTCCCCGTCTTTCTCTTGGGCTCAACTCCTGGTGCAAGGCCTATAAGGCCCCAACCAACCACCAAAGAAGTAAAATCTTCACCTGCAGCTTCTTCAATTCATAGAGG
Silene conica	3	mt	CAAGGCAATACCCATACTATTAAA[R2]	20-17	Silene_conica_mito_101	56619	A>G	No k-mer coverage for reference allele	AGGCATCGCTATAAGGTAAGGGCGTTTACATTATTTACTTTACATAATAGGGGACATAAACGGGAGTAGATCCGAGGGCTTTTCCAATATCCGAACACCCCTCGTCTCCCCGTCTTTCTCTTGGGCTCAACTC
Silene conica	3	mt	CACGTGGATAAATAGAGTTTTAAT[R2]	24-17	Silene_conica_mito_101	56619	A>G	No k-mer coverage for reference allele	ATAGGGGACATAAACGGGAGTAGATCCGAGGGCTTTTCCAATATCCGAACACCCCTCGTCTCCCCGTCTTTCTCTTGGGCTCAACTCCTGGTGCAAGGCCTATAAGGCCCCAACCAACCACCAAAGAAGTAAA
Silene conica	3	mt	AACGACCCAGCAAGACGTATTTAA[R1]	28-14	Silene_conica_mito_102	13757	C>A	k-mer Count >= 10	AATCTCTAACTTTTCAATCTCTGACTCTGAGTATTCTACGGGCACCGAGTGCGGCCAAGCATAAATAAAAAAAGGATCTTAATACTGGCAGAGTCCTATCTCGATACGGTAAAACCTGACCTTACCAAGGAGA
Silene conica	1	mt	ATTGCTATCTTCGTCCACTGAGAA	16-6	Silene_conica_mito_102	16344	A>G	k-mer Count >= 10	CGTCTCGTCTTCGTGTAAGAGAGGGATGAACGACTAAAAAGGAAGGTAGGCAGGTGGTGGTAGGCTCTAAGAATTGCTCTGTCTTGCCCGATCCATCCGATGGAGCGCTAGCTTCCTCTTGGCTCCCCATTTCTTCCTATCGAGTC
Silene conica	2	cp	AATTCCCCGGCAAGAATCTTCTAA	15-12	Silene_conica_mito_102	27779	A>C	k-mer Count >= 10	TGTTTTTCTCTTTTCTTCCGATGTTCCTCTATTCTAACAGCCCTCAACTGTACACTAACCTTTTAAGGAGATAAGGAGGCTCCGCTGAGGTACGAGGTGGAGGGGCCAGACGCTGAGTTAATCTCAGTAGATCAGGTCGCGGCAGTAGACTATCAGCCTGTGGAGTCGAGTTCATTTGGGAAGTCAAGTAGATC
[truncated: 4,736 more rows]
